# Supplementary material for: Comparative Genomic Analysis of Drechmeria coniospora Reveals Core and Specific Genetic Requirements for Fungal Endoparasitism of Nematodes
Source: PubMed Central journal article supplement (PMC4859500; doi:10.1371/journal.pgen.1006017), 2016-05-06
Supplement: pgen.1006017.s014.pdf [file pgen.1006017.s014.pdf]

|           |                                               |
|-----------|-----------------------------------------------|
| 1-36      | .MHIQLRND..R..Y.RNGY.grhcnPDN..YGTGSGYDDDSAAA |
| 37-74     | WLHIQLRNEHRR..Y.RSCW..whhdPDD..GRTGTGHDDDPAAA |
| 75-111    | RMQFRLRNECYR....NGYG..whhdPDD..HGTGSRHDDDSAAA |
| 112-149   | WLHIQLRDEHRR..Y.RSCW..whhdPDN..GRPGPRYKYDSAAA |
| 150-186   | WMYFRLRNE..R..Y.RNCY.eryrdPDD..YGTGSGYEYDGA   |
| 187-223   | WMHIQLRDE..R..Y.RDCY.rrlydPDD..YGTGSGYEHDGTAA |
| 224-261   | WMHIQLRNKHRY..Y.RSCW..whydPDD..GRPGPGYKYDSAAA |
| 262-298   | RVYFRLCNECYR....NGYG..rhrnPDD..YGSGRHDDDSAA   |
| 299-335   | WLYIQLRDE..R..Y.RDCY.rrlydPDD..YGTGSGHEHDGTAA |
| 336-373   | WMHIQLRNKHRY..Y.RSCW..whydPDD..GRPGPRYKYDSAAA |
| 374-410   | RVYFRLCNE..R..Y.RNCY.grlndPDD..YGTGSGYEHDSTAA |
| 411-448   | WMHIQLRNEYR..Y.RSCW..whydPDD..GRPSPRYKYDSAAA  |
| 449-485   | WVYFRLCNE..R..Y.RNCY.rrlydPDD..YGTGSGITTQTTTG |
| 505-541   | RVHCRLRDE..R..Y.RDGY.gwlydPDD..YGTGSGYEYDRTTA |
| 542-579   | WMHIQLHNEHYR..Y.RSCW..whydPDD..YGTGSGHEHDGTAA |
| 580-619   | WMHIQLRNEHYR..Y.RSCW..whydPDDddYGTGSGYEHNGTAA |
| 620-656   | WMIYQLRNEHYRngYgRHC.....nPDD..YGTGSRHDDDCAAA  |
| 657-693   | WMHIQLRDE..R..Y.RDCY.rrlydPDD..YGTGSGYKYNATA  |
| 694-730   | RVYIQLRNEHYRngYgRHC.....nPDD..YGTGSRHDDDCAAA  |
| 731-767   | WMHIQLRDE..R..Y.RDCY.rrlydPDD..YGTGSGYEHDGTAA |
| 768-805   | WMHIQLRNEHYR..Y.RSCW..whydPDD..YGTGSGHEYDGTAA |
| 806-845   | WMIYQLRNEHYR..Y.RSCWwhydsdDDD..YGTGSGYEHDGTAA |
| 846-882   | WMHIQLRNEHYRngYgRHC.....nPDD..YGTGSRHDDDCAAA  |
| 883-914   | WMHIQLRDE..R..Y.CDCY.rrlydPDD..YGTGSGYEH..... |
| 916-931   | .....DD..YGTGSGHEHDGTAA                       |
| 932-969   | WMHIQLPNEHYR..Y.RSCW..whydPDD..YGTGSGYEHDGTAA |
| 970-1007  | WMHIQLRNEHYR..Y.RSCW..whydPDD..YGTGSGYEHDGTAA |
| 1008-1045 | WMHIQLRNEHYH..N.RSCW..whydPDD..YGTGSGYKHDSTAA |
