# Supplementary material for: Comparative Genomic Analysis of Drechmeria coniospora Reveals Core and Specific Genetic Requirements for Fungal Endoparasitism of Nematodes
Source: PubMed Central journal article supplement (PMC4859500; doi:10.1371/journal.pgen.1006017), 2016-05-06

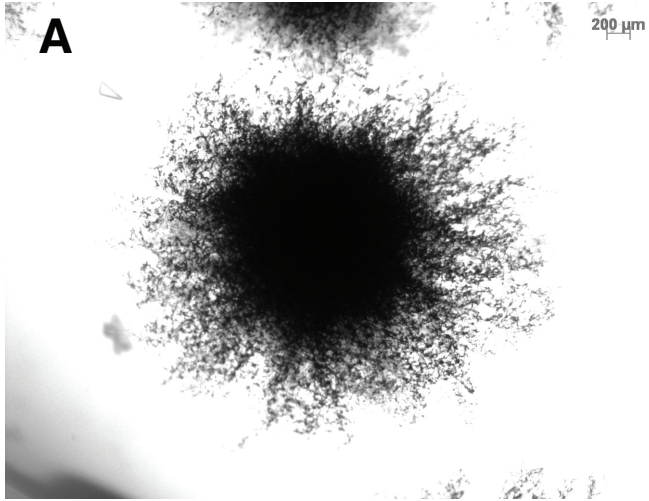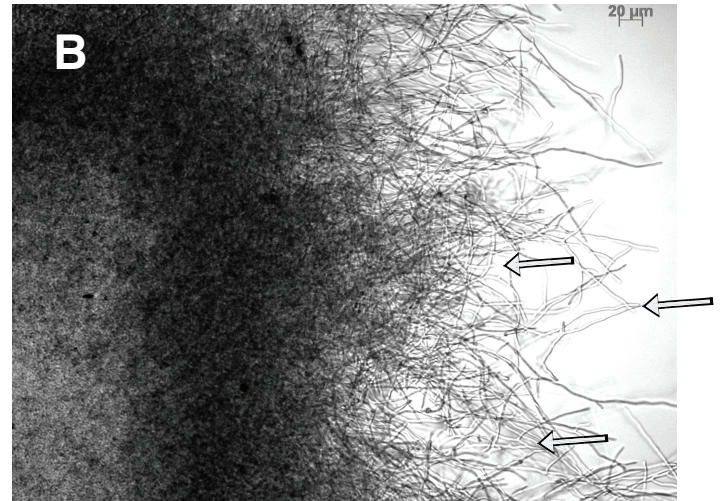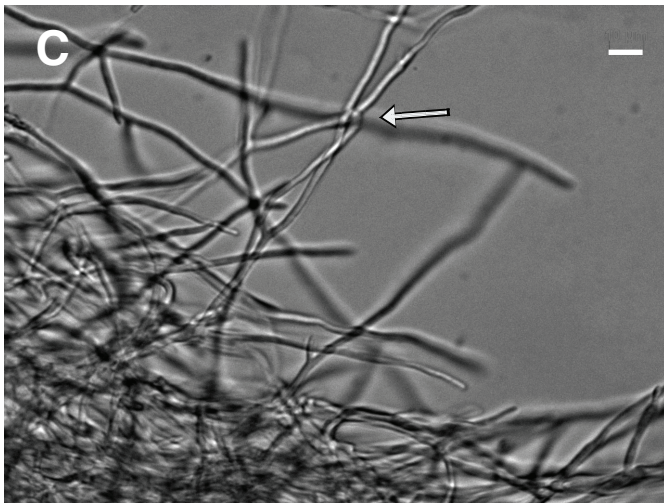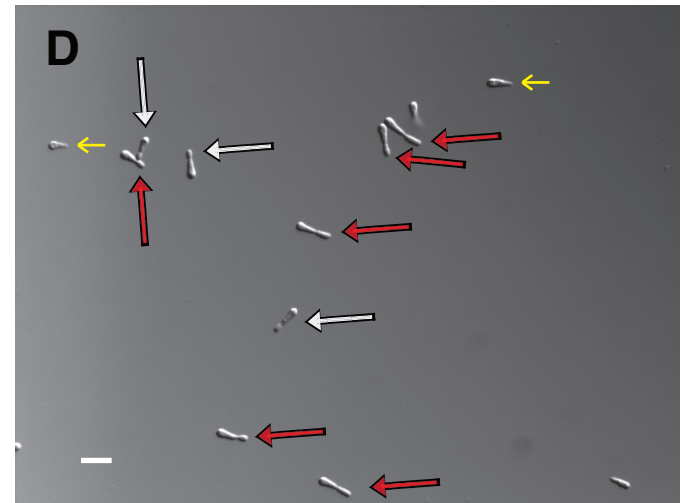

Supplement: pgen.1006017.s015.pdf [file pgen.1006017.s015.pdf]
