# Supplementary material for: Comparative Genomic Analysis of Drechmeria coniospora Reveals Core and Specific Genetic Requirements for Fungal Endoparasitism of Nematodes
Source: PubMed Central journal article supplement (PMC4859500; doi:10.1371/journal.pgen.1006017), 2016-05-06

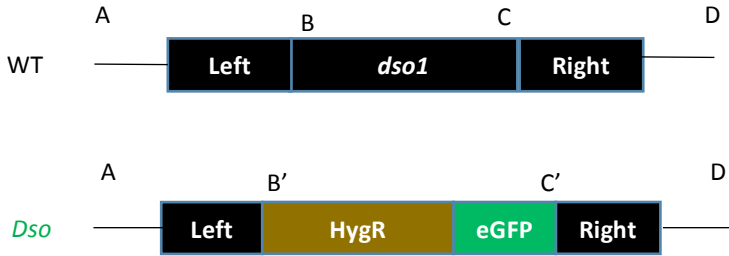

|        | Primer  | Primer sequence        |
|--------|---------|------------------------|
| A      | JEP2267 | CGAGTCCAGCGACTTGCGAC   |
| B      | JEP2674 | CGCACGCCGCGGCTGGCTTC   |
| B'     | JEP2266 | CTTGTTGATGTACGGAGCACCC |
| C      | JEP2675 | CACATCTGGAGTACGGAAGG   |
| C'     | JEP2269 | GCATGGACGAGCTGTACAAG   |
| D      | JEP2268 | GTACCAGGTACCTACCCCTCC  |
| HygR F | JEP2162 | ATGCCTGAACTACCGCGAC    |
| HygR R | JEP2216 | TTCCTTTGCCCTCGGACGAG   |

| Primer pair | Expected size | Amplifies from WT | Amplifies from <i>Dso</i> knock-in |
|-------------|---------------|-------------------|------------------------------------|
| AB          | 1.6 kb        | Yes               | No                                 |
| AB'         | 1.6 kb        | No                | Yes                                |
| CD          | 1.6 kb        | Yes               | No                                 |
| CD'         | 1.6 kb        | No                | Yes                                |
| HygR F/R    | 1 kb          | No                | Yes                                |

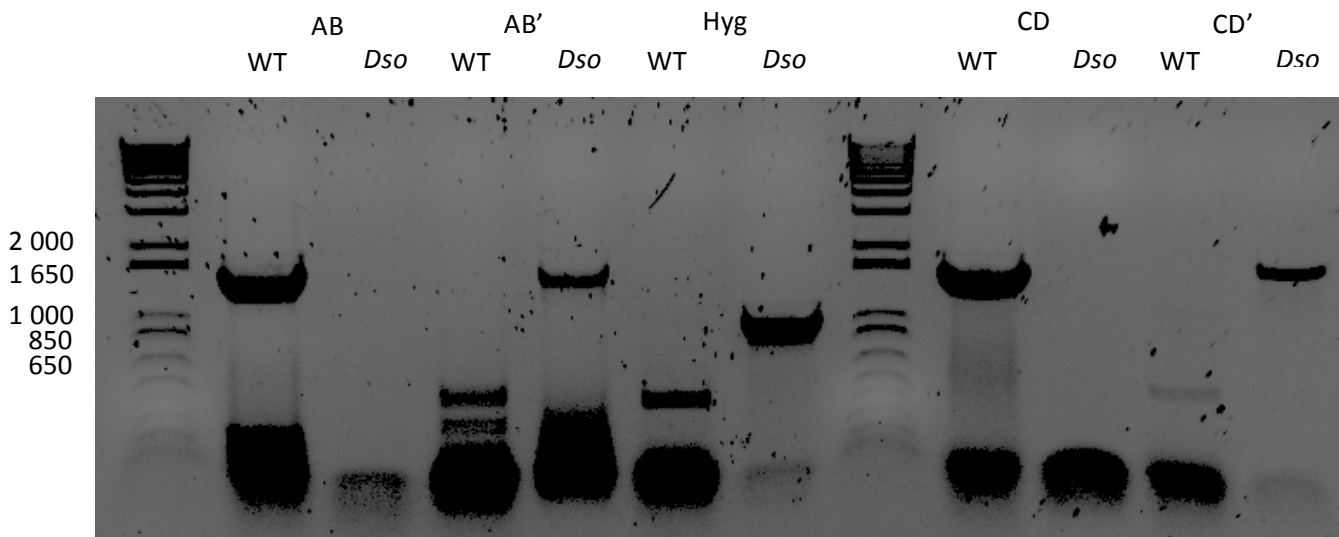

Supplement: pgen.1006017.s016.pdf [file pgen.1006017.s016.pdf]
