# Supplementary material for: Comparative Genomic Analysis of Drechmeria coniospora Reveals Core and Specific Genetic Requirements for Fungal Endoparasitism of Nematodes
Source: PubMed Central journal article supplement (PMC4859500; doi:10.1371/journal.pgen.1006017), 2016-05-06
Supplement: pgen.1006017.s017.pdf [file pgen.1006017.s017.pdf]

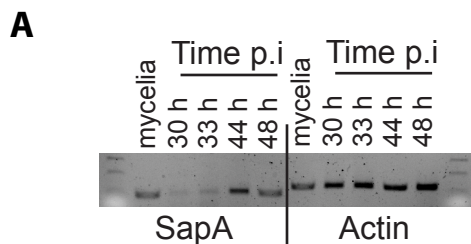

**B**

|                                    |                                                               |
|------------------------------------|---------------------------------------------------------------|
| WBGene00004998   F08F1.6   SPP-13  | MQSLQLLTFVLIALMVSVTFABIIQKGLAKHGMLKENKPNCLLRSRLGCTCTTCKEIV    |
| WBGene00004999   K09F5.3   SPP-14  | MKT---TFCLLA-LVAVATAL-----ALPSQQDNAMSCLMCEVGV                 |
| WBGene00004991   T08A9.10   SPP-6  | -----MTCM-----TGLR-QRNALDCEMCKLAV                             |
| WBGene00004987   T08A9.12   SPP-2  | MKT---VLVLA-VAVALCV-----VLPK-ERSSLGCMCELAV                    |
| WBGene00004990   T08A9.9   SPP-5   | MKT---LLVLAV-LVAVASGL-----AIPE-NRSALSCQMCELVV                 |
| WBGene00005000   C48E7.10   SPP-15 | -MNYLIL--LA--FLAITLTVSNV-----EGAKKMHSDTSKPLCGLCVNVV           |
| WBGene00004986   T07C4.4   SPP-1   | -MTRILPCLFLV--LLAAAPLLANP-----AN-PLNLKHHGVFCDVCKALV           |
| WBGene00004997   T22G5.7   SPP-12  | MFSK--TVVLL--MVVPAISLAQP-----AS-PLVLKSHGAFCHLCEDLI            |
|                                    | . * * :                                                       |
| WBGene00004998   F08F1.6   SPP-13  | NFTRMLILNHVPE-EQEVMEKVCYRIFGDDKKKESFCEELIKEELPDI IKYVRNHLEPKQ |
| WBGene00004999   K09F5.3   SPP-14  | RAAENPADREAHT-VEDKFDAECKKELGIIPFAEKECEKYGNSKLDPIINELEGGTAPED  |
| WBGene00004991   T08A9.10   SPP-6  | KSADGDADKDTND-IKKDFDAKCKKAFHSIQFAPRECEHYVDKKLDPIIKELESGETSPKD |
| WBGene00004987   T08A9.12   SPP-2  | KTYDGSADKDVTS-IKKDFDAECKKLFHAI PFAPQCEHYVNEKLDPIIKELESGETAPKD |
| WBGene00004990   T08A9.9   SPP-5   | KKYEGSADKDVTS-IKKDFDAECKKLFHTIPFGTRECDHYVNSKVDPIIHELEGGTAPKD  |
| WBGene00005000   C48E7.10   SPP-15 | KQLDQVLEHGGD--IEAAVDKFKEDVP--SFMVDMCEKVI EKNLEYIINKLKDHEEADK  |
| WBGene00004986   T07C4.4   SPP-1   | EGGEKVGDDDLDAWLDVNI GTLCWTML---LPLHHECEEELKVKKELKDKDIENKDSPDK |
| WBGene00004997   T22G5.7   SPP-12  | KDGKEAGDVALDVWLDEEIGSRCKDFG----VLASECFKELKVAEHWIWEAIDQEI PEDK |
|                                    | . * * . . : : :                                               |
| WBGene00004998   F08F1.6   SPP-13  | ACA KFC-----                                                  |
| WBGene00004999   K09F5.3   SPP-14  | VCKKLKEC-----                                                 |
| WBGene00004991   T08A9.10   SPP-6  | VCTKLGECS-----                                                |
| WBGene00004987   T08A9.12   SPP-2  | VCKKLGECPK-----                                               |
| WBGene00004990   T08A9.9   SPP-5   | VCTKLNECP-----                                                |
| WBGene00005000   C48E7.10   SPP-15 | ICTDILLCRTPKQYFLETQK                                          |
| WBGene00004986   T07C4.4   SPP-1   | ACKDVDLC-----                                                 |
| WBGene00004997   T22G5.7   SPP-12  | TCKEAKLC-----                                                 |
|                                    | .                                                             |
