# Supplementary material for: Comparative Genomic Analysis of Drechmeria coniospora Reveals Core and Specific Genetic Requirements for Fungal Endoparasitism of Nematodes
Source: PLoS Genet. 2016 May 6;12(5):e1006017. doi: 10.1371/journal.pgen.1006017 (PMC4859500; doi:10.1371/journal.pgen.1006017)
Supplement: S11 Table — The first sheet lists the D. coniospora proteins predicted to be secreted, together with the scores from the analysis programs, and annotations taken from S5 Table. The second sheet gives the data sources for the comparative analysis. The last sheet shows the results of sequence based clustering of proteins from five nematophagous fungal species. Only clusters including at least one predicted secreted protein are considered. (XLSX) [file pgen.1006017.s011.xlsx]

## Sheet: Drechmeria secretome
Gene_id	Alternative ID	sequence	Cmax	pos	Ymax	pos	Smax	pos	Smean	D	?	Dmaxcut	Networks-used		WolFPsort_FUNGI	Mature seq	mature length	NLStradamus	NucPred-score	WolFPsort_mature_ANIMAL	Top_loc	cluster	BLASTP	PHIBASE	Pfam	PANTHER	SUPERFAMILY	TIGRFAM	ProDom	ProSitePatterns	ProSiteProfiles	SMART	Coils	Gene3D	Hamap	PIRSF	PRINTS
g79.t1	Dreco_g79	MKFSTFAVVAWAAAVQANPEPTPMPDIIADASSFIGNAIPNAATFISGIAPAAGGIISDAKSIASKVVPGLGSEWASITSSFGAKQSSLSSVLATATDNAVKSSINAELSKAAAGLAAASNSLVAAATTTSSSSAGAAAPAQTGVVAIGALLGGAAVLANM	0.352	18	0.467	18	0.755	6	0.627	0.553	Y	0.45	SignalP-noTM		extr 23, mito 3	PEPTPMPDIIADASSFIGNAIPNAATFISGIAPAAGGIISDAKSIASKVVPGLGSEWASITSSFGAKQSSLSSVLATATDNAVKSSINAELSKAAAGLAAASNSLVAAATTTSSSSAGAAAPAQTGVVAIGALLGGAAVLANM	143	none	0.06	plas 8, lyso 8, mito 7, cyto 5, extr 4, cysk_plas 4	plas		-	-	-	-	-	-	-	-	-	-	-	-	-	-	-
g147.t1	Dreco_g147	MQLFALLLALAMGARAAPSTYQPYGVEIKPVTPKQLEHSQQVKGTTILDRMVDEWALQRSLRCYFDLAALRCVVARSGWPRENRFYELKVHVEVPEVGHQTAWSTPYIYFGDKKNVNDNDALTQLFDAPSPNYDNLVTIDIRKTFGEQYNAPLARLSKFKIAQPLAVAQFPIPALVFEMRLKGSPMVFTQTVQADKNHEYCENGESGYAITMEGELKEEGWHAEVDLEPEASEKIKSLNDARLKDIGWIWE	0.819	17	0.877	17	0.958	8	0.933	0.907	Y	0.45	SignalP-noTM		extr 7, cyto_mito 6.166, cyto_nucl 5.833, mito 5.5, cyto 5.5, nucl 4, pero 4	PSTYQPYGVEIKPVTPKQLEHSQQVKGTTILDRMVDEWALQRSLRCYFDLAALRCVVARSGWPRENRFYELKVHVEVPEVGHQTAWSTPYIYFGDKKNVNDNDALTQLFDAPSPNYDNLVTIDIRKTFGEQYNAPLARLSKFKIAQPLAVAQFPIPALVFEMRLKGSPMVFTQTVQADKNHEYCENGESGYAITMEGELKEEGWHAEVDLEPEASEKIKSLNDARLKDIGWIWE	234	none	0.05	cyto 23.5, cyto_nucl 15, nucl 3.5, extr 3	cyto		-	-	-	-	-	-	-	-	-	-	-	-	-	-	-
g185.t1	Dreco_g185	MHPLRTLASALAAVVLAVPSSLAYSVRRNPLRSVSFVDDAVIKTPSHRVHAYSAFDLTFTLRDGRRKVRLVLEPNDDLIHDDFGVTILAADGTVRRVEKVARTEFKVFRGDAFIDRPGHGGWSKAGWARITVREDGERPIFDGAFRIDGDNHHVQTAVEYLQLRGDDDPVIRSSEGAMVFFRDSDVMDSPDEATELKRRSVQESLCDADSLDFNGKFDPRSQSPGLLDIRSLFGRQAIDGGGSGSGLNLVSSIGSVDGCPTTRKVALVGIATDCTYWEDFDTQEELRQNVISMVNKASQVYESTFKISLAIQNLTISEKGCPGTPSQFTPWNVNCSSQVTINDRLNTFSKWRGQFSDDNAYWTLLTKCATDSAVGLAWRGQLCRTGSGDNSNGKGSNET…	0.59	24	0.683	24	0.935	6	0.794	0.743	Y	0.45	SignalP-noTM		extr 23, plas 2	SVRRNPLRSVSFVDDAVIKTPSHRVHAYSAFDLTFTLRDGRRKVRLVLEPNDDLIHDDFGVTILAADGTVRRVEKVARTEFKVFRGDAFIDRPGHGGWSKAGWARITVREDGERPIFDGAFRIDGDNHHVQTAVEYLQLRGDDDPVIRSSEGAMVFFRDSDVMDSPDEATELKRRSVQESLCDADSLDFNGKFDPRSQSPGLLDIRSLFGRQAIDGGGSGSGLNLVSSIGSVDGCPTTRKVALVGIATDCTYWEDFDTQEELRQNVISMVNKASQVYESTFKISLAIQNLTISEKGCPGTPSQFTPWNVNCSSQVTINDRLNTFSKWRGQFSDDNAYWTLLTKCATDSAVGLAWRGQLCRTGSGDNSNGKGSNETVAATNVVVRTASEWLIFAHESGHT…	776	720 - RKRSRRRRLPK - 730	0.54	mito 10.5, nucl 9, cyto_mito 7, plas 5, extr_plas 4, pero 3	mito	Cluster03305	Q4WQ08|ADMB_ASPFU|0	-	PF13688|Metallo-peptidase family M12|1.8E-60;PF00200|Disintegrin|4.0E-18;	PTHR11905:SF129||2.0E-162;PTHR11905||2.0E-162;	SSF57552||1.3E-13;SSF55486||1.53E-41;	-	-	-	PS50214|Disintegrin domain profile.|16.732;PS50215|ADAM type metalloprotease domain profile.|14.618;	SM00050|Homologues of snake disintegrins|1.2E-24;	-	G3DSA:4.10.70.10||8.2E-14;G3DSA:3.40.390.10||1.1E-47;	-	-	-
g197.t1	Dreco_g197	MTPPSPLIGPALLAFLAFLACGVPAPPPAILANGVHAATEGTLLRPRREPLSPEYRGDDGEYVELNDLSSSTTTSVESLPRYEAVIGLSISSSAAASPAGPSTNLHATHTFQIETLGHPLIALPFSTTPVPILIYRVLPTGTLGPLAYQSLRQTRRSGNSVLVKPDDHLAEQPLCSTSYRFGPKRPPHMQLLGEAACDEVFEVHAKGCHTRAQGIRTHLGTFRWRYASRAERRAAGADSLVVLDLVTSVALAGGKSRERRRRIAQLVRNDEWRTKGTRGCTAGNGGRLMMDLGDWAAAKSELLQMEVLVIASCIVMLKKEVDRRKMQQMIIMAGGAGGGP	0.31	23	0.531	23	0.948	7	0.909	0.735	Y	0.45	SignalP-noTM		extr 13, plas 7, mito 3, E.R. 3	PAPPPAILANGVHAATEGTLLRPRREPLSPEYRGDDGEYVELNDLSSSTTTSVESLPRYEAVIGLSISSSAAASPAGPSTNLHATHTFQIETLGHPLIALPFSTTPVPILIYRVLPTGTLGPLAYQSLRQTRRSGNSVLVKPDDHLAEQPLCSTSYRFGPKRPPHMQLLGEAACDEVFEVHAKGCHTRAQGIRTHLGTFRWRYASRAERRAAGADSLVVLDLVTSVALAGGKSRERRRRIAQLVRNDEWRTKGTRGCTAGNGGRLMMDLGDWAAAKSELLQMEVLVIASCIVMLKKEVDRRKMQQMIIMAGGAGGGP	317	none	0.55	cyto 15, pero 6.5, mito_pero 5.5, mito 3.5, nucl 3, plas 2.5	cyto	Cluster01080	-	-	-	-	-	-	-	-	-	-	-	-	-	-	-
g199.t1	Dreco_g199	MFRKTIAALAAVSALTGQVSASNHRHNHRGEAHKREVVHKVETITSTVVEYHKPDAGKDFVYNVKPAPPQQAAPPLDAAQAQAQAQAQAQAQAQAQAQAQAQAQAQAQTQAQTQAQASPAPAQAGGSPFPGGKRGIAFESLDAANTLKKSCDTCTWGYNWQPTCPSGVNAGFTYIPTLWGNDHDRRTAWPAIAEQAIAAGSKIFFCFNEPDIPEQSNITPQQAAVDFVALMNPYKKDNITLGAPSVSNAGEANKGLDWLKNFLAACKQLPEPCVIDFCNVHWYSGFKYRETLFTHLAEAYTICDKKPIWLTEFAPNDGNVTQFMEEVIPRLDDIDYLHGYSYFKAETLVKGTIVNENGDAYASVH	0.797	22	0.692	22	0.805	1	0.59	0.637	Y	0.45	SignalP-noTM		extr 21, mito 5	NHRHNHRGEAHKREVVHKVETITSTVVEYHKPDAGKDFVYNVKPAPPQQAAPPLDAAQAQAQAQAQAQAQAQAQAQAQAQAQAQAQTQAQTQAQASPAPAQAGGSPFPGGKRGIAFESLDAANTLKKSCDTCTWGYNWQPTCPSGVNAGFTYIPTLWGNDHDRRTAWPAIAEQAIAAGSKIFFCFNEPDIPEQSNITPQQAAVDFVALMNPYKKDNITLGAPSVSNAGEANKGLDWLKNFLAACKQLPEPCVIDFCNVHWYSGFKYRETLFTHLAEAYTICDKKPIWLTEFAPNDGNVTQFMEEVIPRLDDIDYLHGYSYFKAETLVKGTIVNENGDAYASVH	343	none	0.21	cyto 19, mito 6, pero 4	cyto	Cluster00802	Q09788|ASL1_SCHPO|1e-12	-	PF11790|Glycosyl hydrolase catalytic core|3.6E-50;	PTHR34154||6.3E-59;PTHR34154:SF3||6.3E-59;	SSF51445||2.11E-16;	-	-	-	-	-	Coil||-;	G3DSA:3.20.20.80||4.0E-11;	-	-	-
g200.t1	Dreco_g200	MPNVARVPIATSFLAVFLAAVATVGADDGATVSPVSQVPALASSNSLQLTLSAQSSHQYTVIPLTQNPGLNGSLPSPGYVKIVGNLRAATATTYFDIKGPQDVAYLSCDGAPDTNFINPNRMFNELMKQKPNAIVLYSTSQNMCDISSDSSGTFPYDNILTMADAGEASNLLNHLNASKTRSVGVTISGNATDGDNEASGGSNNSAVAMSILYSITGLITLLFLVIIATGAIRAHRYPERYGPRNAIGGRARQSRAKGLARAVLDTIPIVKFGPQESTKVDPQLELEASTSRSEPGTQMTRPSMAEEASTAGGAGASRRQSRDTTTSGNHSADNERAEEDHLGCSICTEDFKVGEDVRVLPCNHQFHPNCVDPWLIDVSGTCPLCRLDLRPSHANARKA…	0.577	27	0.72	27	0.957	17	0.893	0.814	Y	0.45	SignalP-noTM		extr 22, E.R. 3	DGATVSPVSQVPALASSNSLQLTLSAQSSHQYTVIPLTQNPGLNGSLPSPGYVKIVGNLRAATATTYFDIKGPQDVAYLSCDGAPDTNFINPNRMFNELMKQKPNAIVLYSTSQNMCDISSDSSGTFPYDNILTMADAGEASNLLNHLNASKTRSVGVTISGNATDGDNEASGGSNNSAVAMSILYSITGLITLLFLVIIATGAIRAHRYPERYGPRNAIGGRARQSRAKGLARAVLDTIPIVKFGPQESTKVDPQLELEASTSRSEPGTQMTRPSMAEEASTAGGAGASRRQSRDTTTSGNHSADNERAEEDHLGCSICTEDFKVGEDVRVLPCNHQFHPNCVDPWLIDVSGTCPLCRLDLRPSHANARKASTAGDDESIAPPLALEAEDGRPPSSSR…	472	none	0.46	plas 13, extr 8, mito 4, nucl 2, lyso 2	plas	Cluster03991	Q9M2S6|SDIR1_ARATH|6e-14	2401|PHI:2401|CaRING1|G0T3B3|456327|Xanthomonascampestrispvvesicatoria|Mixedoutcome|1e-09	PF13639|Ring finger domain|1.7E-12;	PTHR22765||8.0E-74;PTHR22765||8.0E-74;PTHR22765:SF27||8.0E-74;PTHR22765:SF27||8.0E-74;	SSF57850||6.56E-18;	-	-	-	PS50089|Zinc finger RING-type profile.|12.784;	SM00184|Ring finger|8.7E-8;	-	G3DSA:3.30.40.10||5.0E-17;	-	-	-
g227.t1	Dreco_g227	MKPSFLLVTSLIGAHAAPGGNVNAGLRKKLDCGRESDDIVLCRLVEDVPHTFDRIGLRVKLSKRDDAGTSVKIYGTFRPETAFYPSNPHVHQLFDAPQSGSSFAQEFNFWDEFGEDKMAVKDFSQFQILQMLNDQVHLKGNSYLIEGIVLEIHHVQSGQILRNELEAPCDDCTSWFPPKNALLREHDGKVLNSIWTERWEWHEWLVRVNTTSEHRSGPCMPETFDQEQCDLDPIYRGYPPILEMAEASNGIFSNHI	0.394	17	0.481	17	0.762	16	0.611	0.551	Y	0.45	SignalP-noTM		extr 7, pero 6, cyto_nucl 5.333, nucl 5, cyto_mito 3.666, cyto 3.5, mito 2.5	PGGNVNAGLRKKLDCGRESDDIVLCRLVEDVPHTFDRIGLRVKLSKRDDAGTSVKIYGTFRPETAFYPSNPHVHQLFDAPQSGSSFAQEFNFWDEFGEDKMAVKDFSQFQILQMLNDQVHLKGNSYLIEGIVLEIHHVQSGQILRNELEAPCDDCTSWFPPKNALLREHDGKVLNSIWTERWEWHEWLVRVNTTSEHRSGPCMPETFDQEQCDLDPIYRGYPPILEMAEASNGIFSNHI	239	none	0.16	cyto 19, cyto_nucl 12, extr 8, nucl 3	cyto	Cluster03867	-	-	-	-	-	-	-	-	-	-	-	-	-	-	-
g253.t1	Dreco_g253	MKFSTTVTVLFATIASAGVIGRDEEASAASSNPLDNILTPIRTFLTDLNTLDTTDRARAGVAVDESFKNLMLKIVRSIFGHGSARTQAS	0.221	22	0.401	18	0.816	15	0.744	0.586	Y	0.45	SignalP-noTM		extr 19, cyto 5, mito 3	DEEASAASSNPLDNILTPIRTFLTDLNTLDTTDRARAGVAVDESFKNLMLKIVRSIFGHGSARTQAS	67	none	0.04	cyto 18.5, cyto_nucl 13, cysk 5, nucl 4.5	cyto		-	-	-	-	-	-	-	-	-	-	-	-	-	-	-
g281.t1	Dreco_g281	MHLHTAARSLFAAALTLQVASAHHIVLQAQGLECFHEKLHKDDKMSVTFQVGDREFGSAGSLEIDFWITNPTGVYEVTDKAVASGDHSFTANQDGIYTYCFGNQHWGANTKEVSFNVHGVVFVSESDLPTDPIESEVRRLSDLLAQVRDEQQYIVVRERTHRNTAESTNARVKWWNLFVIGVVIGESLFQVWWLRRFFEVKRVV	0.724	23	0.742	23	0.885	2	0.761	0.752	Y	0.45	SignalP-noTM		extr 13, cyto 6, mito 5, pero 2	HIVLQAQGLECFHEKLHKDDKMSVTFQVGDREFGSAGSLEIDFWITNPTGVYEVTDKAVASGDHSFTANQDGIYTYCFGNQHWGANTKEVSFNVHGVVFVSESDLPTDPIESEVRRLSDLLAQVRDEQQYIVVRERTHRNTAESTNARVKWWNLFVIGVVIGESLFQVWWLRRFFEVKRVV	181	none	0.01	cyto 19, cyto_nucl 15, nucl 7, cysk 4	cyto	Cluster01342	P32803|EMP24_YEAST|8e-61	-	PF01105|emp24/gp25L/p24 family/GOLD|3.1E-44;	PTHR22811:SF31||5.5E-74;PTHR22811||5.5E-74;	SSF101576||8.24E-15;	-	-	-	PS50866|GOLD domain profile.|16.036;	-	-	-	-	-	-
g375.t1	Dreco_g375	MHRILLTLPALVAIANAVDSCQPQAPSVHTITYTTTTTLYRGKPCATPPSATKLPSITTQPQPSKPHSSSEPDVECTADPKVESVFGSAPVKSHTLSPGSSGSWSNTTTNSTDIPTRAQTSLASATSQLQPQSTGNLGRYPVAGNTTKGLKNALYFTNWGIYARNYLPSMIPVDKITHLLYAFAGVDANGTVISIDPWADEQKQLNDTSSMPGSNVYGCVKEIYLHKKKHRNLKTLLSIGGWTASDKGAFNFAASDTGRRQFARSAVSLMSDWGMDGLDVDWEYPKNAEEAQQYVQLLEACRKELDDFATKHRQKYHYLLTVASSAGPNTYNVMDLKGMDRFLDAWNLMAYDYAGDWSDNTGHLANLHPNSNNPNSTVFSTAKAVGDYLAAGISPHKLI…	0.659	18	0.767	18	0.926	9	0.89	0.833	Y	0.45	SignalP-noTM		extr 22, mito 2, nucl 1, cyto 1, cyto_nucl 1, vacu 1	DSCQPQAPSVHTITYTTTTTLYRGKPCATPPSATKLPSITTQPQPSKPHSSSEPDVECTADPKVESVFGSAPVKSHTLSPGSSGSWSNTTTNSTDIPTRAQTSLASATSQLQPQSTGNLGRYPVAGNTTKGLKNALYFTNWGIYARNYLPSMIPVDKITHLLYAFAGVDANGTVISIDPWADEQKQLNDTSSMPGSNVYGCVKEIYLHKKKHRNLKTLLSIGGWTASDKGAFNFAASDTGRRQFARSAVSLMSDWGMDGLDVDWEYPKNAEEAQQYVQLLEACRKELDDFATKHRQKYHYLLTVASSAGPNTYNVMDLKGMDRFLDAWNLMAYDYAGDWSDNTGHLANLHPNSNNPNSTVFSTAKAVGDYLAAGISPHKLIIGLPLYGRSFEMTLGLGK…	515	none	0.27	nucl 26.5, cyto_nucl 15, mito 3	nucl	Cluster00042	P32470|CHI1_APHAL|1e-134	144|PHI:144|CHT42|AAC05829|29875|Trichodermavirens|Reducedvirulence|1e-121	PF00704|Glycosyl hydrolases family 18|9.1E-72;	PTHR11177||5.6E-111;PTHR11177||5.6E-111;	SSF51445||5.46E-95;SSF51445||5.46E-95;SSF54556||3.46E-15;	-	-	PS01095|Chitinases family 18 active site.|-;	-	SM00636||1.6E-109;	-	G3DSA:3.20.20.80||3.7E-98;G3DSA:3.20.20.80||3.7E-98;G3DSA:3.10.50.10||4.1E-22;	-	-	-
g382.t1	Dreco_g382	MRVLPVLLWLGLCGRSMANLHLVFDFDGTITEADTTDVLARASITRYKGHRCRNLRGIWDDVVDAYLADYKKFDRRYWPAARHRTTVAQELRYLEKLKPVEEASLNRVSETRFFARLDDQALYRAGIDAVLSGRVVVRPGFRALLELAYDKGWQTDILSANWSRAFIRGVLHAYPDIRTTSNEVTPSTGELRGTNLDLGRLTTSSDKLKALQYLTDGDQGPVIYFGDSTTDLACLLHVQGVILAANKKTSLMKTVSRLGLDAPHVSEPQEEQPALTWASDFHDILDSGILEM	0.579	19	0.687	19	0.905	3	0.81	0.753	Y	0.45	SignalP-noTM		extr 17, mito 6, cyto 2	LHLVFDFDGTITEADTTDVLARASITRYKGHRCRNLRGIWDDVVDAYLADYKKFDRRYWPAARHRTTVAQELRYLEKLKPVEEASLNRVSETRFFARLDDQALYRAGIDAVLSGRVVVRPGFRALLELAYDKGWQTDILSANWSRAFIRGVLHAYPDIRTTSNEVTPSTGELRGTNLDLGRLTTSSDKLKALQYLTDGDQGPVIYFGDSTTDLACLLHVQGVILAANKKTSLMKTVSRLGLDAPHVSEPQEEQPALTWASDFHDILDSGILEM	273	none	0.12	cyto 19, cyto_nucl 15.5, nucl 8, cysk 5	cyto	Cluster05336	Q9UUE0|YNZC_SCHPO|3e-09	-	PF12710|haloacid dehalogenase-like hydrolase|2.7E-13;	PTHR28181||9.3E-24;PTHR28181:SF1||9.3E-24;	SSF56784||9.32E-20;	-	-	-	-	-	-	G3DSA:3.40.50.1000||9.8E-7;G3DSA:3.40.50.1000||9.8E-7;	-	-	-
g388.t1	Dreco_g388	MPSFLSALALAAAAVTAATVPQPSAPSPPSLNDYQSLVLGNGHIVNKTERKPSLAELGVDNVTQHSGYIDVADDKHLFYWFFESRNDPENDPVVLWLNGGPGCSSMIGLFDEVGPVTAPAENLTLVRNAHSWNNNASIIFLDQPVGTGFSYGASNVSTTAEASRDVYAFLTLFFEKFPDYSKLDFHMAGKSYAGTYIPIFAHEILSRANGSIKLKSVMIGNGITDPLTQYGALRPMACGGGGHEPVLDEEQCEAMDEALPSCENLIRQCQDEGTAKECGWARVSCDLNLLDAYSKSNRSLCDVRRAQGSLGVSFGREFLNLPHVQDALGVKPSRFDICSDQVYFDFVRGESMLPAYKFVPKILDKISVLIYAGDASLICNWLGNRAWVHKLDWTGSKDF…	0.418	18	0.621	18	0.949	9	0.92	0.783	Y	0.45	SignalP-noTM		extr 27	TVPQPSAPSPPSLNDYQSLVLGNGHIVNKTERKPSLAELGVDNVTQHSGYIDVADDKHLFYWFFESRNDPENDPVVLWLNGGPGCSSMIGLFDEVGPVTAPAENLTLVRNAHSWNNNASIIFLDQPVGTGFSYGASNVSTTAEASRDVYAFLTLFFEKFPDYSKLDFHMAGKSYAGTYIPIFAHEILSRANGSIKLKSVMIGNGITDPLTQYGALRPMACGGGGHEPVLDEEQCEAMDEALPSCENLIRQCQDEGTAKECGWARVSCDLNLLDAYSKSNRSLCDVRRAQGSLGVSFGREFLNLPHVQDALGVKPSRFDICSDQVYFDFVRGESMLPAYKFVPKILDKISVLIYAGDASLICNWLGNRAWVHKLDWTGSKDFNEAADDRLRISPDREAYG…	441	none	0.02	cyto_nucl 12, nucl 10.5, cyto 10.5, cysk 5, mito 2, lyso 2	cyto_nucl	Cluster00045	C7YQJ2|CBPYA_NECH7|1e-153	901|PHI:901|um01886||5270|Ustilagomaydis|Unaffectedpathogenicity|2e-93	PF00450|Serine carboxypeptidase|6.3E-111;	PTHR11802:SF51||9.1E-151;PTHR11802||9.1E-151;	SSF53474||7.93E-117;	-	-	-	-	-	-	G3DSA:1.10.287.410||4.3E-21;G3DSA:3.40.50.1820||1.2E-107;G3DSA:3.40.50.1820||1.2E-107;	-	-	PR00724|Carboxypeptidase C serine protease (S10) family signature|4.2E-21;PR00724|Carboxypeptidase C serine protease (S10) family signature|4.2E-21;PR00724|Carboxypeptidase C serine protease (S10) family signature|4.2E-21;PR00724|Carboxypeptidase C serine protease (S10) family signature|4.2E-21;
g415.t1	Dreco_g415	MARRRGRKGLSLLLALALGSGSAVAASITAVAAGPAPASAPAPAPAAHPPPAVQPQPPQRKEDAAPPRVRADRDRRQQAPLQQWPLHAPAAAEDESRAQAGAPPAPPPRRLHGRFLHITDFHPDDLYKVHSSTDEDIACHRGNGIAGTYGTARSDCDSPYSLVNATFAWIEANIRDQIDFVIWTGDSARHDSDERHPRHEAQVLASNRAIADKFVETFVADGSGRLSVPVVPTFGNNDFLPHNIMRPGPNKWFQAYGDIWRRFIPEEQRHLFAFGGWFAVDVVPDRLAVLSLNTMFFFDRNAAVDGCADPAEPGYKLMEWLGVQLQRLRDKGMKAILMGHVPPARTDSKQNWDETCWQRYHLWLHQYRDVVTASLFGHMNIDHFLLADTRNIDLATVAG…	0.667	26	0.787	26	0.976	17	0.921	0.859	Y	0.45	SignalP-noTM		extr 17, mito 6, plas 2	SITAVAAGPAPASAPAPAPAAHPPPAVQPQPPQRKEDAAPPRVRADRDRRQQAPLQQWPLHAPAAAEDESRAQAGAPPAPPPRRLHGRFLHITDFHPDDLYKVHSSTDEDIACHRGNGIAGTYGTARSDCDSPYSLVNATFAWIEANIRDQIDFVIWTGDSARHDSDERHPRHEAQVLASNRAIADKFVETFVADGSGRLSVPVVPTFGNNDFLPHNIMRPGPNKWFQAYGDIWRRFIPEEQRHLFAFGGWFAVDVVPDRLAVLSLNTMFFFDRNAAVDGCADPAEPGYKLMEWLGVQLQRLRDKGMKAILMGHVPPARTDSKQNWDETCWQRYHLWLHQYRDVVTASLFGHMNIDHFLLADTRNIDLATVAGQRRPPKHDSISLLSKGDYLQDLRDEW…	790	503 - GKKNRKGRKSRKKKKKKGGKKKGKNK - 528	0.79	nucl 10, cyto 5, mito 5, cyto_mito 5, cysk 4	nucl	Cluster05327	Q9P3S1|PPN1_NEUCR|1e-146	-	-	PTHR10340:SF36||6.4E-201;PTHR10340:SF36||6.4E-201;PTHR10340:SF36||6.4E-201;PTHR10340:SF36||6.4E-201;PTHR10340||6.4E-201;PTHR10340||6.4E-201;PTHR10340||6.4E-201;PTHR10340||6.4E-201;	SSF56300||2.61E-22;SSF56300||2.61E-22;	-	-	-	-	-	-	G3DSA:3.60.21.10||3.4E-26;	-	-	-
g418.t1	Dreco_g418	MRRPRPAFLTLALAALVSASPYPRSEWYDAGFSLLVRRGCSAYCGADSQFCCNANEVCTTLANNVATCVGAGYGPYTTTWTETRTFTSTYMTNWNPAPLPTAGVDCVPQGAEQEACGSICCAGWQTCAFKGQCSIRPGYAEPSAVIVTHDGQIATRYSAPFRVTGTTTVIGRGPSTATATSTGDGTAVGADGGSNRRALSPGAIAGIVIGTLAGIGLLLLLCFCCVARGLWNALFGRADKKEERRERVEVTEERYSRHGSRVPSAYSRRDRHSGWVGSSSRPSSAGYRREKKSDGKWWLGLAGVAATLLALLNLKSDKKKPARKDMSSRYSDSYLSYTDVTSPTASSSSDRRTNYSRRTGDSRAGRSQHSRAPSRRP	0.737	20	0.794	20	0.9	12	0.852	0.825	Y	0.45	SignalP-noTM		extr 15, plas 9, mito 1, E.R. 1, vacu 1	PYPRSEWYDAGFSLLVRRGCSAYCGADSQFCCNANEVCTTLANNVATCVGAGYGPYTTTWTETRTFTSTYMTNWNPAPLPTAGVDCVPQGAEQEACGSICCAGWQTCAFKGQCSIRPGYAEPSAVIVTHDGQIATRYSAPFRVTGTTTVIGRGPSTATATSTGDGTAVGADGGSNRRALSPGAIAGIVIGTLAGIGLLLLLCFCCVARGLWNALFGRADKKEERRERVEVTEERYSRHGSRVPSAYSRRDRHSGWVGSSSRPSSAGYRREKKSDGKWWLGLAGVAATLLALLNLKSDKKKPARKDMSSRYSDSYLSYTDVTSPTASSSSDRRTNYSRRTGDSRAGRSQHSRAPSRRP	357	none	0.33	plas 31	plas	Cluster02794	-	-	-	-	-	-	-	-	-	-	-	-	-	-	-
g435.t1	Dreco_g435	MLAAFIIVVTLAAGLDAAPSPHRHWHHSHHARHHDGIRPSSTAMRRRMVEEGSGAPYENGLPKANSPVPVRIRVLDEHPDIRAVVDNAMLPLVM	0.572	18	0.694	18	0.914	1	0.821	0.762	Y	0.45	SignalP-noTM		extr 13, plas 6, E.R. 4, nucl 1, mito 1, cyto 1, cyto_nucl 1, pero 1, cyto_mito 1, mito_nucl 1, cyto_pero 1	PSPHRHWHHSHHARHHDGIRPSSTAMRRRMVEEGSGAPYENGLPKANSPVPVRIRVLDEHPDIRAVVDNAMLPLVM	76	none	0.2	nucl 15.5, mito 10, cyto_nucl 10, cyto 3.5	nucl		-	-	-	-	-	-	-	-	-	-	-	-	-	-	-
g446.t1	Dreco_g446	MRASPLVVLAAAAAAVSAQAQNYTSELEMKIDPNTVQVQVRASWCQAQTNTCTLLCDNETDKNSCAQEDLSFACTCASNSSAPGLQYYVQTMPTFICETLFEQCNIQQVSNAEGQKACMTNIKNLCGKNPPPKGPVSGDSASTTAATTATASTTSASSTTVSTSKSAGFAAPTLALPGSGAAAAAAAVGVLAYFI	0.624	21	0.68	21	0.849	4	0.732	0.708	Y	0.45	SignalP-noTM		extr 27	NYTSELEMKIDPNTVQVQVRASWCQAQTNTCTLLCDNETDKNSCAQEDLSFACTCASNSSAPGLQYYVQTMPTFICETLFEQCNIQQVSNAEGQKACMTNIKNLCGKNPPPKGPVSGDSASTTAATTATASTTSASSTTVSTSKSAGFAAPTLALPGSGAAAAAAAVGVLAYFI	174	none	0.15	plas 9, mito 7, cyto_plas 7, cyto 5, nucl 4, E.R._mito 4	plas	Cluster13587	-	-	-	PTHR38118:SF1||1.4E-30;PTHR38118||1.4E-30;	-	-	-	-	-	-	-	-	-	-	-
g496.t1	Dreco_g496	MQTNMGLLRATFLLLLFLGIGWGQSLPSRRSGTMLDRRQADDFDGEFPKEVYRGETKRTPADVERDGGFVSRGLQKQRAGTALSAMELDLGSSLFHHASGDDTASFTRYVSTSTDPGVALTFAVDDDAPTQKGYLYKIHADDRFLDLNRSLGKYSPYPGQKEHAAIEFIRYEQIEGWYEVTYEKHFSEPQIGKESQDKLRRGAFGHFKKNAKFDKSRFHNLRGRGRVPQLAGFPAISPAWQEVPWKAFKTQAVDKNLNAVIDSLCGGRLRARRGLGCTGRPGGQQGIDGSGPKRPSTGSKGKPRAEKADGGGRKASEAKGPVGAAKGKSRTGEPVRNAGTGPKYQSTGVRLTKETARVAAFVLVLPYARDLLEAIKQWDHPIGHAVKWFDDVMAAFQES…	0.839	24	0.887	24	0.975	16	0.937	0.914	Y	0.45	SignalP-noTM		extr 23, mito 2	SLPSRRSGTMLDRRQADDFDGEFPKEVYRGETKRTPADVERDGGFVSRGLQKQRAGTALSAMELDLGSSLFHHASGDDTASFTRYVSTSTDPGVALTFAVDDDAPTQKGYLYKIHADDRFLDLNRSLGKYSPYPGQKEHAAIEFIRYEQIEGWYEVTYEKHFSEPQIGKESQDKLRRGAFGHFKKNAKFDKSRFHNLRGRGRVPQLAGFPAISPAWQEVPWKAFKTQAVDKNLNAVIDSLCGGRLRARRGLGCTGRPGGQQGIDGSGPKRPSTGSKGKPRAEKADGGGRKASEAKGPVGAAKGKSRTGEPVRNAGTGPKYQSTGVRLTKETARVAAFVLVLPYARDLLEAIKQWDHPIGHAVKWFDDVMAAFQESIGGSQRQDIYGNDLKASLICALKG…	715	291 - GPKRPSTGSKGKPRAEKADGGGRKASEAKGPVGAAKGKSRT - 331	0.42	nucl 15.5, cyto_nucl 15.5, cyto 14.5	nucl	Cluster13585	P43528|E2BA_ECOLX|6e-17	698|PHI:698|CtxA|AAF94614|243277|Vibriocholerae|Reducedvirulence|8e-11	PF01375|Heat-labile enterotoxin alpha chain|6.6E-30;	-	SSF56399||2.8E-30;	-	-	-	-	-	-	G3DSA:3.90.210.10||1.7E-65;	-	-	PR00771|Heat-labile enterotoxin A chain signature|1.5E-7;PR00771|Heat-labile enterotoxin A chain signature|1.5E-7;PR00771|Heat-labile enterotoxin A chain signature|1.5E-7;
g506.t1	Dreco_g506	MPCPKPSLARTLLSSLVLAANLVGLVSASISPALFRDLERHSRIVDITYCIGNSGIRKPFECISRCNDFPELSLVTTWSTGLLLTDSCGYIAVDHGRNKAAKRPGENEDENAKAKADENKRQLGAIVVAFRGTYSIRNTIVDLSTLPQQYVPYPPPDDGGQEPAGKAENRCDNCTVHMGFLQSWQSARDIVLPELKALRAKHPSYPIHLVGHSLGGAVACLAGLEIKTSLGWDDIKVTTFGEPRVGNHELARFIDTVFALDDDAELESRSFRRVTHSRDPVPLLPWGEWGYRSHAGEIYISKPDLSPTEVDMTPCIGDNDPACITDGQSFLHQVMSRWLHFGKPGTNLLEYLETMMFPMRIKPWQLFFAHRDYFWRLGLCVPGGDPTNWGRSHLTDFEQ…	0.689	29	0.763	29	0.947	10	0.84	0.805	Y	0.45	SignalP-noTM		extr 19, E.R. 3, golg 3	ISPALFRDLERHSRIVDITYCIGNSGIRKPFECISRCNDFPELSLVTTWSTGLLLTDSCGYIAVDHGRNKAAKRPGENEDENAKAKADENKRQLGAIVVAFRGTYSIRNTIVDLSTLPQQYVPYPPPDDGGQEPAGKAENRCDNCTVHMGFLQSWQSARDIVLPELKALRAKHPSYPIHLVGHSLGGAVACLAGLEIKTSLGWDDIKVTTFGEPRVGNHELARFIDTVFALDDDAELESRSFRRVTHSRDPVPLLPWGEWGYRSHAGEIYISKPDLSPTEVDMTPCIGDNDPACITDGQSFLHQVMSRWLHFGKPGTNLLEYLETMMFPMRIKPWQLFFAHRDYFWRLGLCVPGGDPTNWGRSHLTDFEQGEL	373	none	0.18	cyto 13.5, cyto_nucl 12.5, extr 7, nucl 6.5, mito 3	cyto	Cluster02337	P61869|MDLA_PENCY|2e-27	2925|PHI:2925|lip2|J9MBA2|59765|Fusariumoxysporumf.sp.Lycopersici|Unaffectedpathogenicity|2e-61	PF01764|Lipase (class 3)|3.5E-31;	PTHR21493||1.5E-85;PTHR21493:SF119||1.5E-85;PTHR21493:SF119||1.5E-85;PTHR21493||1.5E-85;	SSF53474||1.07E-47;SSF53474||1.07E-47;	-	-	-	-	-	-	G3DSA:3.40.50.1820||8.8E-61;G3DSA:3.40.50.1820||8.8E-61;	-	-	-
g580.t1	Dreco_g580	MKSIATLGMLAAAVTASVPRHQYFSRTNMTLSGAGESALGAGETALGASETALGANETALGAGETAPGAGEPTPVAGEPTTSAGETTPGAGQTTLTVLATKVYSVVSCAPSVTNCPAQKSVIDSLPESEKALHFVTSVYALSTTVCPVTDASRIESSISSDHSLTPVVNASSPTLGPENPPIVPETPATTDDTPRTLSYTLGSGTRASVTTAVIGNKHGRPFPPPRPTPQSSDESTTTRTRTSPDGGNPDGGNPDGGIPNGGNPNGGNPDGGIPIGGRPNGGRPDGGNPDGSNTDGGIPNGGNPNGGNPDGGIPIGGRPNGGRPDGGNPDGGNPDGSNTDGGIPNGGNPNGGNPDGGIPIGGRPKGGSPQGCDGQCPPPSTVTVTLPASTVYVTACPSP…	0.359	17	0.452	17	0.718	15	0.547	0.504	Y	0.45	SignalP-noTM		extr 23, nucl 2	VPRHQYFSRTNMTLSGAGESALGAGETALGASETALGANETALGAGETAPGAGEPTPVAGEPTTSAGETTPGAGQTTLTVLATKVYSVVSCAPSVTNCPAQKSVIDSLPESEKALHFVTSVYALSTTVCPVTDASRIESSISSDHSLTPVVNASSPTLGPENPPIVPETPATTDDTPRTLSYTLGSGTRASVTTAVIGNKHGRPFPPPRPTPQSSDESTTTRTRTSPDGGNPDGGNPDGGIPNGGNPNGGNPDGGIPIGGRPNGGRPDGGNPDGSNTDGGIPNGGNPNGGNPDGGIPIGGRPNGGRPDGGNPDGGNPDGSNTDGGIPNGGNPNGGNPDGGIPIGGRPKGGSPQGCDGQCPPPSTVTVTLPASTVYVTACPSPNPADGGKKSGFEADNNL…	507	none	0.46	nucl 20, cyto_nucl 14, cyto 6, mito 4	nucl		-	-	-	-	-	-	-	-	-	-	-	-	-	-	-
g582.t1	Dreco_g582	MRFHASAVVAALPLLARAQENPFGPYKAQLQQVLGKMCSYLPNPGRHDQVAALEAKFGPMHLSTLTLENWKETLYEQDLGPGARSVDEWWVLISGRNKTCFGHCGQVEKAFNETAAKFATTPGAPHMALLNCDDQPILCNSWAAGTGHIWSFGMVPDPDKVEIYKKRLNLTSTTSDDLVALHEAETKEGWVALESWFHPFTGQATELGLAVPWGYIIWAFNLVPNWLFMIIVSFASRSMMGNRMGNMANDRRPGAPGSAGAAGRAQRPS	0.734	19	0.675	19	0.786	16	0.612	0.641	Y	0.45	SignalP-noTM		extr 17, mito 5, plas 3	ENPFGPYKAQLQQVLGKMCSYLPNPGRHDQVAALEAKFGPMHLSTLTLENWKETLYEQDLGPGARSVDEWWVLISGRNKTCFGHCGQVEKAFNETAAKFATTPGAPHMALLNCDDQPILCNSWAAGTGHIWSFGMVPDPDKVEIYKKRLNLTSTTSDDLVALHEAETKEGWVALESWFHPFTGQATELGLAVPWGYIIWAFNLVPNWLFMIIVSFASRSMMGNRMGNMANDRRPGAPGSAGAAGRAQRPS	250	none	0.04	plas 16, mito 4.5, cyto 4, E.R._mito 3.5, nucl 3, extr 2, cyto_pero 2	plas	Cluster07415	-	-	-	-	-	-	-	-	-	-	-	-	-	-	-
g590.t1	Dreco_g590	MLIQFALIALAVGLAGAVPSLVVKGSHFVNPATGKVFQIVGIAYQPGGSAGYDPSTGKDPLSHGDACLRDAALMQAMGVNTIRVYNLDPDINHDECASIFNAAGIYMIIDVNSPLVGEAITSYQPWTSYYMAYLNHTFAVVESFSNYPNTLLYFSGNEVIDKPESATDVPPYLRAITRDLKNYIKNNVKRQIPVGYSAADVRTVLWDTWNYMQCAIDGEATDMSRADIFALNSYSWCGPEATFESSSYNELTDKFKDSSVPVFFSEYGCNRPQPRLWNETVAIYSDKMMPTFSGGVVYQWTEEENNYGLVSIKDGKLSIMGDYNRLKAKWATIDWDTVQSQSPSKKNNAPPECEASLIVEKEFDKNFTLPAVPDDAQKLIDKGIKPKPVGKIVDISDYK…	0.71	18	0.821	18	0.979	3	0.946	0.888	Y	0.45	SignalP-noTM		extr 10, plas 7, golg 5, mito 4	PSLVVKGSHFVNPATGKVFQIVGIAYQPGGSAGYDPSTGKDPLSHGDACLRDAALMQAMGVNTIRVYNLDPDINHDECASIFNAAGIYMIIDVNSPLVGEAITSYQPWTSYYMAYLNHTFAVVESFSNYPNTLLYFSGNEVIDKPESATDVPPYLRAITRDLKNYIKNNVKRQIPVGYSAADVRTVLWDTWNYMQCAIDGEATDMSRADIFALNSYSWCGPEATFESSSYNELTDKFKDSSVPVFFSEYGCNRPQPRLWNETVAIYSDKMMPTFSGGVVYQWTEEENNYGLVSIKDGKLSIMGDYNRLKAKWATIDWDTVQSQSPSKKNNAPPECEASLIVEKEFDKNFTLPAVPDDAQKLIDKGIKPKPVGKIVDISDYKVKLTVVDSDGKEVSDLKV…	481	none	0.07	cyto 17, pero 8, E.R._mito 4	cyto	Cluster02705	P0C954|GEL2_ASPFU|1e-145	434|PHI:434|GEL2|EAL88984|5085|Aspergillusfumigatus|Reducedvirulence|2e-147	PF03198|Glucanosyltransferase|2.5E-108;	PTHR31468:SF4||5.2E-189;PTHR31468||5.2E-189;	SSF51445||1.51E-43;	-	-	-	-	-	-	G3DSA:3.20.20.80||2.8E-27;	-	-	-
g601.t1	Dreco_g601	MPSFISTFAWAAAVSAAAVLQQTKITSGLGHKHTIRRADTLWDHVVRGADLDKRSIGGDSGNFKRYDGQLAGYNLHARSVDPSSLGVDSVKQYSGYLDDEENDKHIFYWFFESRNDPVNDPVALWLNGGPGCSSMVGLFDELGPASIPEENLKPVRNPHSWNSNASIIFLDQPIGTGFSYSSSGKNVSSTAAASKDIYAFLTLFFHQFPQYAKRDFHIAGQSFAGQFIPTFASDILSHNDSNINLKSVLIGNGLVDPLTQYRYFRPMACGEGGHGPALNRSECEEMDEGLPECQRLIKSCYDTLDSAICSSATWQCNMSLFPIYEGSGRDMYDIRRNKGGGKGGYSKQFLNLQNVKETLGAKVDRFEQCSDSVYHNLVKEGGEWMRPAHRSVPKMLEQI…	0.218	18	0.414	18	0.881	3	0.764	0.603	Y	0.45	SignalP-noTM		extr 19, mito 3, cyto 2, E.R. 2	VLQQTKITSGLGHKHTIRRADTLWDHVVRGADLDKRSIGGDSGNFKRYDGQLAGYNLHARSVDPSSLGVDSVKQYSGYLDDEENDKHIFYWFFESRNDPVNDPVALWLNGGPGCSSMVGLFDELGPASIPEENLKPVRNPHSWNSNASIIFLDQPIGTGFSYSSSGKNVSSTAAASKDIYAFLTLFFHQFPQYAKRDFHIAGQSFAGQFIPTFASDILSHNDSNINLKSVLIGNGLVDPLTQYRYFRPMACGEGGHGPALNRSECEEMDEGLPECQRLIKSCYDTLDSAICSSATWQCNMSLFPIYEGSGRDMYDIRRNKGGGKGGYSKQFLNLQNVKETLGAKVDRFEQCSDSVYHNLVKEGGEWMRPAHRSVPKMLEQISVLVYAGDADFICNWLGN…	948	none	0.32	cyto 15, nucl 8, cyto_pero 8, cyto_golg 8	cyto	Cluster00045	C7YQJ2|CBPYA_NECH7|0	901|PHI:901|um01886||5270|Ustilagomaydis|Unaffectedpathogenicity|1e-86	PF00450|Serine carboxypeptidase|5.3E-117;PF00004|ATPase family associated with various cellular activities (AAA)|3.2E-15;PF08542|Replication factor C C-terminal domain|3.2E-12;	PTHR11669:SF18||1.7E-243;PTHR11669||1.7E-243;	SSF53474||1.67E-121;SSF52540||7.71E-51;SSF48019||5.1E-15;	-	-	PS00560|Serine carboxypeptidases, histidine active site.|-;	-	SM00382|ATPases associated with a variety of cellular activities|6.5E-12;	-	G3DSA:1.20.272.10||1.0E-27;G3DSA:1.10.8.60||1.1E-19;G3DSA:3.40.50.300||7.5E-62;G3DSA:3.40.50.1820||2.2E-111;G3DSA:3.40.50.1820||2.2E-111;G3DSA:1.10.287.410||1.3E-24;	-	-	PR00724|Carboxypeptidase C serine protease (S10) family signature|2.3E-22;PR00724|Carboxypeptidase C serine protease (S10) family signature|2.3E-22;PR00724|Carboxypeptidase C serine protease (S10) family signature|2.3E-22;PR00724|Carboxypeptidase C serine protease (S10) family signature|2.3E-22;
g602.t1	Dreco_g602	MRPITYGTILALASSGVLAGVINKRDSAIIINVLNEVKAAMSDVETSIKSFNGDLTSLDPANKKLDKVVTDGTDAVSGMKEQLTLVEAIGLQKLTEGLETEGKALVAAMIAKRDAFKEAGGCDGLRQSLKTMNSNSAALTKAIISKVPEEAQAIAQTQSSGLNKIMEETAKEFSEEKCPSKGPTASSASTNNGVEEEEAPQPTASVQATPTPEAGVATGSVETNGIEDDGQDDTEDTEDTEDIDDTKDNEGSPSPADVGQPPITTNGTDNTAAMTNGTGNTAGSDAVPVVPISLPPPFPASNSTSNSTNLNSNATVAGNPVVQESNPVSNFAVEEAPPAANADSSAQPPAEAVVPPPAEAVVPPPADAADAAEQPPSPPVTPSMEPPVEVASMPPPPPA…	0.798	20	0.674	20	0.734	2	0.544	0.604	Y	0.45	SignalP-noTM		extr 15, mito 7, cyto 5	VINKRDSAIIINVLNEVKAAMSDVETSIKSFNGDLTSLDPANKKLDKVVTDGTDAVSGMKEQLTLVEAIGLQKLTEGLETEGKALVAAMIAKRDAFKEAGGCDGLRQSLKTMNSNSAALTKAIISKVPEEAQAIAQTQSSGLNKIMEETAKEFSEEKCPSKGPTASSASTNNGVEEEEAPQPTASVQATPTPEAGVATGSVETNGIEDDGQDDTEDTEDTEDIDDTKDNEGSPSPADVGQPPITTNGTDNTAAMTNGTGNTAGSDAVPVVPISLPPPFPASNSTSNSTNLNSNATVAGNPVVQESNPVSNFAVEEAPPAANADSSAQPPAEAVVPPPAEAVVPPPADAADAAEQPPSPPVTPSMEPPVEVASMPPPPPAEVEVQEPAPRLPQGPMRPTR…	469	424 - RGPRR - 428	0.15	nucl 15, cyto 12, extr 3	nucl	Cluster14312	Q8TG42|MP1_ASPFL|3e-09	-	PF12296|Hydrophobic surface binding protein A|9.7E-19;	-	-	-	-	-	-	-	-	-	-	-	-
g606.t1	Dreco_g606	MQFISVVAALLSIAQAVDVHIVAVGKNPMNNQTGLKYYPEKIKALPGSMVQYQFWDGNHTVTQSSFDKPCVPLSVSNTSAVGVYSSFQPAAASQNTGRIPVFSVMINDTKPIWLYCGQGTHCQKGMVMVINENTQANASRSLENYKKLAEVATQGNSGIPSGGNGSNSGNNSSSKTTPGTQSTSVKDKPTATSVAVSAANSRIYAATSTLLLLGIAFVLL	0.669	17	0.761	17	0.918	12	0.873	0.822	Y	0.45	SignalP-noTM		extr 23, plas 2	DVHIVAVGKNPMNNQTGLKYYPEKIKALPGSMVQYQFWDGNHTVTQSSFDKPCVPLSVSNTSAVGVYSSFQPAAASQNTGRIPVFSVMINDTKPIWLYCGQGTHCQKGMVMVINENTQANASRSLENYKKLAEVATQGNSGIPSGGNGSNSGNNSSSKTTPGTQSTSVKDKPTATSVAVSAANSRIYAATSTLLLLGIAFVLL	203	none	0.03	plas 12, cyto 7.5, cyto_mito 6.5, mito 4.5, nucl 4, golg 2	plas	Cluster06950	D4B3I5|A3024_ARTBC|7e-17	-	-	PTHR34883:SF1||1.8E-53;PTHR34883||1.8E-53;	SSF49503||2.0E-13;	-	-	-	-	-	-	G3DSA:2.60.40.420||2.0E-10;	-	-	-
g615.t1	Dreco_g615	MRPARLVALAGAAAVAVTTSNAPTTAPATTLSVAWTAVEDHVGDDAGSSRSASQPNTSAHFTSTNVSTTRANATASHSHAVEVAGGAIPQQMQASMLGLLGFCIMGLIML	0.141	21	0.307	21	0.781	2	0.657	0.496	Y	0.45	SignalP-noTM		extr 25	APTTAPATTLSVAWTAVEDHVGDDAGSSRSASQPNTSAHFTSTNVSTTRANATASHSHAVEVAGGAIPQQMQASMLGLLGFCIMGLIML	89	none	0.03	extr 14, extr_plas 13.5, plas 11, mito 4	extr		-	-	-	-	-	-	-	-	-	-	-	-	-	-	-
g648.t1	Dreco_g648	MVPRRIFAALFATGALCGTYIEYQNIKLGDVIGTSETAKFQIERLTEYFKGQPPAYKEQCIHCTEPKGWMISGAPCYTTREIAFPDEDGIEILIDAHEVREEISGRVNENIDVKESHVLIKTNTFGWRNQTGLTGGGDGSIGYSFPGAPPGGFYGGGGGGVHASKENEQKNETTNTSDDLVSFDLNFVCLRFRLCSVQLWTYRIKIRGRCPVVPTVDPVCYRNWINNHRSDRGNSWYDEIEKSPIFKQKEFLNGKFSLPSVYHQIKEWDVASKGYVDSIFDTTKTSCPSGGPCEVWQNETISPHSQVDGLWWPLESRYLVKYTTDEPCELEFPVFVDGERKKSQVVMQYAMTNALREALEKDKEFSELEKEYNKLTGTTAEKESVGGGTGTKFSTENNR…	0.169	18	0.338	18	0.827	1	0.628	0.495	Y	0.45	SignalP-noTM		extr 12, mito 6, cyto 5, nucl 2	TYIEYQNIKLGDVIGTSETAKFQIERLTEYFKGQPPAYKEQCIHCTEPKGWMISGAPCYTTREIAFPDEDGIEILIDAHEVREEISGRVNENIDVKESHVLIKTNTFGWRNQTGLTGGGDGSIGYSFPGAPPGGFYGGGGGGVHASKENEQKNETTNTSDDLVSFDLNFVCLRFRLCSVQLWTYRIKIRGRCPVVPTVDPVCYRNWINNHRSDRGNSWYDEIEKSPIFKQKEFLNGKFSLPSVYHQIKEWDVASKGYVDSIFDTTKTSCPSGGPCEVWQNETISPHSQVDGLWWPLESRYLVKYTTDEPCELEFPVFVDGERKKSQVVMQYAMTNALREALEKDKEFSELEKEYNKLTGTTAEKESVGGGTGTKFSTENNRNRLGSHRRARKLKARWED…	451	405 - HRRARKLK - 412	0.2	cyto 23, extr 2, nucl 2, mito 2, mito_nucl 2	cyto	Cluster02180	-	-	-	-	-	-	-	-	-	-	Coil||-;	-	-	-	-
g656.t1	Dreco_g656	MYPLVPSLTVLLAAASAAAAILEMPWNRPCGTDAPPADLVTLHQKLSRKKGMARRGAYPTIDVDVRVHVIYSGQSTGKSSEHLVSNSMIQRQMAVLNEGFNATGFVFHFKGADWTYNETLTRGHHTLQFVKSLPPGGEDCLHVYMVEQVFAEDSRVAGYAPFPYRIVGTRARVVFIAIGTVPGAARPWYSRNLGRSLIHEAGHSLGLLHLHDGRDCLGDGDYVHDTPSQRAPTYLCNTKVDTCEGEPELKAGSNYMDVLHESVGPLTPTWQAKGSG	0.409	20	0.594	20	0.956	12	0.873	0.745	Y	0.45	SignalP-noTM		extr 17, E.R. 4, plas 3, mito 2	ILEMPWNRPCGTDAPPADLVTLHQKLSRKKGMARRGAYPTIDVDVRVHVIYSGQSTGKSSEHLVSNSMIQRQMAVLNEGFNATGFVFHFKGADWTYNETLTRGHHTLQFVKSLPPGGEDCLHVYMVEQVFAEDSRVAGYAPFPYRIVGTRARVVFIAIGTVPGAARPWYSRNLGRSLIHEAGHSLGLLHLHDGRDCLGDGDYVHDTPSQRAPTYLCNTKVDTCEGEPELKAGSNYMDVLHESVGPLTPTWQAKGSG	256	none	0.02	cyto_nucl 15, cyto 14.5, nucl 8.5, extr 4, mito 4	cyto_nucl	Cluster02219	E3QKH9|MEP2_COLGM|8e-15	479|PHI:479|MEP1|AAQ07436|199306|Coccidioidesposadasii|Reducedvirulence|2e-11	PF05572|Pregnancy-associated plasma protein-A|6.7E-9;	-	SSF55486||6.83E-11;	-	-	-	-	-	-	G3DSA:3.40.390.10||2.7E-5;	-	-	-
g658.t1	Dreco_g658	MRGRLDGLLLAVRALVLLSCPSLRPAIHVHASPTPAEPGGHDLLPALVHRGCEFEPADVFARGFKPRASWGPMVQDYVVGWHVKHRGGSAYTSTTSSQHVAESFAAFGTLVHAADVAPDAPPIEWERRKGDGELRDNWVYEIIPTAAFVQVYGTLLPGYRRRGHSLREPQMEYAAVGSIDADQIVAAYRVADPQRRLLFNPNFNFAYLGLKAGPGRPELDRDLFALVKEGKDVQVCTEIKEKALEIRAAAEKTKEDCRREYEKRPRPRPNWHEHMRHADFLQSFADVISVRRRESGADVGPTKATTHGDGSRHDDDDDEDDATSQEKDEKDGRPGAGTRCKRSQLCGPGEEARNPTKAAEAGAKTKAPSSPENGGRHPQRLDDGKDGHGKDRHNGRDHD…	0.2	27	0.386	27	0.908	14	0.767	0.592	Y	0.45	SignalP-noTM		extr 19, E.R. 3, golg 2, vacu 2	HVHASPTPAEPGGHDLLPALVHRGCEFEPADVFARGFKPRASWGPMVQDYVVGWHVKHRGGSAYTSTTSSQHVAESFAAFGTLVHAADVAPDAPPIEWERRKGDGELRDNWVYEIIPTAAFVQVYGTLLPGYRRRGHSLREPQMEYAAVGSIDADQIVAAYRVADPQRRLLFNPNFNFAYLGLKAGPGRPELDRDLFALVKEGKDVQVCTEIKEKALEIRAAAEKTKEDCRREYEKRPRPRPNWHEHMRHADFLQSFADVISVRRRESGADVGPTKATTHGDGSRHDDDDDEDDATSQEKDEKDGRPGAGTRCKRSQLCGPGEEARNPTKAAEAGAKTKAPSSPENGGRHPQRLDDGKDGHGKDRHNGRDHDRHNERDHGQDHNQDNGEDNGEDNGEDN…	709	543 - HFRRDPRGGKGVGTGAGHARHQSRPGRTGSGA - 574	0.58	nucl 18, cyto_nucl 16, cyto 12	nucl		-	-	-	-	SSF56399||5.11E-9;SSF56399||5.11E-9;	-	-	-	-	-	Coil||-;	G3DSA:3.90.210.10||8.0E-21;	-	-	-
g659.t1	Dreco_g659	MRSLALLVPFLVRACDASRSDLDPAVQRRAGWGEDVKDAFVLDPREAVACPTDAGQLEMLTQSSGGKALDAEIYGCVPGLKAFFRSRSGIGAGESDATPTSSRLRRRSRTCADSVKIWGCIRGFDCRHVQSVLATSQCRQFECGSRSMEMQCSPLQEAAPGSEVAVDELIFDVEVADEAGADALGQLVADVGGQRQVDLFPHLGRGESATVAVNIADVFGGAVEVPLRTLSKLKLLYKPMRTSSLFAGHSLCDHAILKTVRMRVRHTGSGLFLRYSPIVTSTGMKNCETRLNPVWIGELPFGSWRAELSE	0.508	18	0.586	18	0.812	13	0.673	0.633	Y	0.45	SignalP-noTM		extr 16, cyto 6, mito 5	RSDLDPAVQRRAGWGEDVKDAFVLDPREAVACPTDAGQLEMLTQSSGGKALDAEIYGCVPGLKAFFRSRSGIGAGESDATPTSSRLRRRSRTCADSVKIWGCIRGFDCRHVQSVLATSQCRQFECGSRSMEMQCSPLQEAAPGSEVAVDELIFDVEVADEAGADALGQLVADVGGQRQVDLFPHLGRGESATVAVNIADVFGGAVEVPLRTLSKLKLLYKPMRTSSLFAGHSLCDHAILKTVRMRVRHTGSGLFLRYSPIVTSTGMKNCETRLNPVWIGELPFGSWRAELSE	292	none	0.19	nucl 16.5, cyto_nucl 13.5, cyto 7.5, extr 6	nucl	Cluster14340	-	-	-	-	-	-	-	-	-	-	-	-	-	-	-
g675.t1	Dreco_g675	MSLFSPTRGTWLLVLGITLVLMPGKVVAFGAGNIPSIAQVEGHNWRHGDIEDMLASIAFLHGKKWTSMLIKRTYFGNWLRDYSQAVDVGSLKGVNAATVRILVWVLSFMAFGYATDEFEVTEERLGCYRPEEHIDNPKGYADGMDARKFDPRLRGPVEPVELEVDPRTGMKNYIANETGHWATSAGYLRYSFARSVHFGRLYTCGAQGKGKDENLCEALRCLGQALHCMEDFGAHSNYCELALRELGHHNVFTHCGAQAEMNIQGKRLYPVVTGTFGAVDFLHSVIGEANDHFTQSEVDEVDVALKNAEAARGGDVSGSRGLFDGSGSNDFISLISKLPDVGNDFANQARSLKAASDSQEQQNQERSRAGENVNIVPGMSANFDPVKTAGQIYPILQFR…	0.755	29	0.826	29	0.949	8	0.903	0.868	Y	0.45	SignalP-noTM		extr 15, plas 11	GAGNIPSIAQVEGHNWRHGDIEDMLASIAFLHGKKWTSMLIKRTYFGNWLRDYSQAVDVGSLKGVNAATVRILVWVLSFMAFGYATDEFEVTEERLGCYRPEEHIDNPKGYADGMDARKFDPRLRGPVEPVELEVDPRTGMKNYIANETGHWATSAGYLRYSFARSVHFGRLYTCGAQGKGKDENLCEALRCLGQALHCMEDFGAHSNYCELALRELGHHNVFTHCGAQAEMNIQGKRLYPVVTGTFGAVDFLHSVIGEANDHFTQSEVDEVDVALKNAEAARGGDVSGSRGLFDGSGSNDFISLISKLPDVGNDFANQARSLKAASDSQEQQNQERSRAGENVNIVPGMSANFDPVKTAGQIYPILQFRDRIVKAISRGISKIPGLEKLLEHISETLT…	720	none	0.34	cyto 7.5, cyto_nucl 7, E.R. 6.5, E.R._mito 6.33333, nucl 5.5, mito_pero 3.5, extr 3, mito 3, pero 2.5, extr_plas 2.5	cyto	Cluster05772	-	-	PF07217|Heterokaryon incompatibility protein Het-C|7.8E-291;	PTHR14905:SF7||2.5E-240;PTHR14905:SF7||2.5E-240;PTHR14905||2.5E-240;PTHR14905||2.5E-240;	-	-	-	PS00289|Pentaxin family signature.|-;	-	-	-	-	-	-	-
g678.t1	Dreco_g678	MALSIAAKLAAVVAVAGIATAATVQQDFNITWVRANPDGAFERPVIGINGKWPIPLIECNKGDRIVINVNNQLGNQSTSLHFHGLFMNGTTHMDGPSGVTQCPILPGESLTYNFTIDQPGTYWYHSHTHAQYPDGLRGPLIVHDKDFPYNGQFDYERVLTLSDWYHDEMRNMLPAFMSKTNPTGAEPVPDAALINETQNLTIPVETGKTYLFRVINIGAFAGQYLWVEGHKLRIVEVDGVYTQQAEADTIYLSAAQRVSFLLTTKNDTDANFPIVASMDKTLFDQLPPELNYNATAWLTYDDAKPKPEAALVDSYDEFDDMKLEPYDGMALLPEPDHNVELDVAMDNLGDGANYAFFNNITYAPPKVPTLYSVLSAGEHVMNPTVYGEYTHPFVLKKDE…	0.474	22	0.631	22	0.913	5	0.841	0.745	Y	0.45	SignalP-noTM		extr 21, plas 2, E.R. 2	TVQQDFNITWVRANPDGAFERPVIGINGKWPIPLIECNKGDRIVINVNNQLGNQSTSLHFHGLFMNGTTHMDGPSGVTQCPILPGESLTYNFTIDQPGTYWYHSHTHAQYPDGLRGPLIVHDKDFPYNGQFDYERVLTLSDWYHDEMRNMLPAFMSKTNPTGAEPVPDAALINETQNLTIPVETGKTYLFRVINIGAFAGQYLWVEGHKLRIVEVDGVYTQQAEADTIYLSAAQRVSFLLTTKNDTDANFPIVASMDKTLFDQLPPELNYNATAWLTYDDAKPKPEAALVDSYDEFDDMKLEPYDGMALLPEPDHNVELDVAMDNLGDGANYAFFNNITYAPPKVPTLYSVLSAGEHVMNPTVYGEYTHPFVLKKDEIVQIVVNNLDPGRHPFHLHGHN…	593	none	0.01	cyto 15.5, cyto_nucl 9.5, pero 7, mito 4, nucl 2.5	cyto	Cluster00640	P38993|FET3_YEAST|0	2920|PHI:2920|FET3-1|E3QRA4|31870|Colletotrichumgraminicola|Reducedvirulence|0.0	PF00394|Multicopper oxidase|9.1E-37;PF07731|Multicopper oxidase|8.4E-40;PF07732|Multicopper oxidase|1.4E-43;	PTHR11709:SF105||4.4E-214;PTHR11709||4.4E-214;	SSF49503||1.42E-44;SSF49503||3.92E-42;SSF49503||1.75E-42;	-	-	PS00079|Multicopper oxidases signature 1.|-;PS00080|Multicopper oxidases signature 2.|-;PS00079|Multicopper oxidases signature 1.|-;	-	-	-	G3DSA:2.60.40.420||3.4E-37;G3DSA:2.60.40.420||2.6E-44;G3DSA:2.60.40.420||3.4E-46;	-	-	-
g742.t1	Dreco_g742	MRGGSWLLSATCPFALASLLLADSVIVSSEEGGTFVITHFCHLQVPAPTCISCCPNIAYRQTTSVCHLPSISQPLLLVA	0.605	23	0.752	23	0.974	15	0.934	0.85	Y	0.45	SignalP-noTM		extr 23, cyto 2	SVIVSSEEGGTFVITHFCHLQVPAPTCISCCPNIAYRQTTSVCHLPSISQPLLLVA	56	none	0.04	extr 16, cysk 8, extr_plas 8	extr		-	-	-	-	-	-	-	-	-	-	-	-	-	-	-
g759.t1	Dreco_g759	MPSTLLATFKAALALTATATIGYASTIRPPPGTFPAARGFGLERRAPGVSGKPWIRSFNLSVPIDHFHNDSCYEPHSDGHFNLRYWLDASNYKEGGPVIVLHSGEFNSQDRLAYLDYGIVSILTKATGGVGLILEHRYYGTSFPTANLTFENLRFLTTEQALADTAYFAKHVQFYGLEHHNLTAPNAPWILYGGSYAGSVAAFARKLYPDIFWGAISSSGPLQAIDNFWQFFEVSRRYAPADCSVTQQKLVHVIDTMLFSNDSRDATRIKKVFGLEYLWDDEFAGLLSATWGRFQNTNWDPKLNDTSFNAYCTTITSNSLLFQNATSLRSEVERAVILAGYKGEAELLSTQMLNWIGYTRKKMERLGEWCRKKDLRECISGRFDQPNTRLDAGFMRTWG…	0.312	25	0.468	25	0.847	12	0.711	0.6	Y	0.45	SignalP-noTM		extr 13, mito 6, pero 3, cyto 2, nucl 1, plas 1, vacu 1	TIRPPPGTFPAARGFGLERRAPGVSGKPWIRSFNLSVPIDHFHNDSCYEPHSDGHFNLRYWLDASNYKEGGPVIVLHSGEFNSQDRLAYLDYGIVSILTKATGGVGLILEHRYYGTSFPTANLTFENLRFLTTEQALADTAYFAKHVQFYGLEHHNLTAPNAPWILYGGSYAGSVAAFARKLYPDIFWGAISSSGPLQAIDNFWQFFEVSRRYAPADCSVTQQKLVHVIDTMLFSNDSRDATRIKKVFGLEYLWDDEFAGLLSATWGRFQNTNWDPKLNDTSFNAYCTTITSNSLLFQNATSLRSEVERAVILAGYKGEAELLSTQMLNWIGYTRKKMERLGEWCRKKDLRECISGRFDQPNTRLDAGFMRTWGYQTCTEWGLFQSGEGFPEDVLPVVS…	529	none	0.36	nucl 14, cyto 8, mito 8, cyto_mito 8	nucl	Cluster00930	D4AYS6|A1345_ARTBC|1e-143	-	PF05577|Serine carboxypeptidase S28|1.4E-49;	PTHR11010:SF11||1.7E-110;PTHR11010||1.7E-110;	SSF53474||1.28E-14;	-	-	-	-	-	-	G3DSA:3.40.50.1820||6.4E-14;G3DSA:3.40.50.1820||6.4E-14;	-	-	-
g760.t1	Dreco_g760	MKFNLAASFLLVASALSSPVASTEPTFDRVKLADPQNWVAGISLFPSQIIAGYNAKLDEYTAQQWADHVLAECKKFRACTSTVSFAGKPTPHFPTIEFSYTNDVVDMTIADNSGDDGGRFWFGYVFRGGATTPASYKRSKNGNVSDSVAYTVV	0.647	23	0.747	23	0.95	11	0.863	0.81	Y	0.45	SignalP-noTM		extr 26	EPTFDRVKLADPQNWVAGISLFPSQIIAGYNAKLDEYTAQQWADHVLAECKKFRACTSTVSFAGKPTPHFPTIEFSYTNDVVDMTIADNSGDDGGRFWFGYVFRGGATTPASYKRSKNGNVSDSVAYTVV	130	none	0.09	cyto 10.5, mito 9, cyto_nucl 9, nucl 6.5, extr 4	cyto	Cluster02645	-	-	-	-	-	-	-	-	-	-	-	-	-	-	-
g761.t1	Dreco_g761	MARTSLLLSLAVAPLAALAHRACDDAVPRAYMLELKRDCPPHVLDEAIGEIGTIRLNLVSDIYTGVSFQVDDVPDADERADGLAKHPCVQAMSPVCRFKVVKSTRRRPRTDPTSDRAKWKRHASANVTEDTFEPHVMTQVDRLRALGYTGTGVRIAVIDSGIDFTHPDLGGCYGGTCLVSFGADLAGDYGNGTNPDAPSLPMDGTGHGTHVAGIVAGQPNELGFSGVAPGAKLGAYRTEGLDGQAEDDFLTAAYLRAYNDKVDVIVTSISIIGGWPHHIFATTIQSIVEKGVPCVVSAGNDGDIGYFNSHSPATAKGAMSVATFISIANTTLEHKAKYVVDDGGAVVGFNYKPAEPSAWGKTRLGLYTASTNTTDHPHDACGALPESTPDLANKIVLIH…	0.249	20	0.476	20	0.96	11	0.914	0.713	Y	0.45	SignalP-noTM		extr 25	RACDDAVPRAYMLELKRDCPPHVLDEAIGEIGTIRLNLVSDIYTGVSFQVDDVPDADERADGLAKHPCVQAMSPVCRFKVVKSTRRRPRTDPTSDRAKWKRHASANVTEDTFEPHVMTQVDRLRALGYTGTGVRIAVIDSGIDFTHPDLGGCYGGTCLVSFGADLAGDYGNGTNPDAPSLPMDGTGHGTHVAGIVAGQPNELGFSGVAPGAKLGAYRTEGLDGQAEDDFLTAAYLRAYNDKVDVIVTSISIIGGWPHHIFATTIQSIVEKGVPCVVSAGNDGDIGYFNSHSPATAKGAMSVATFISIANTTLEHKAKYVVDDGGAVVGFNYKPAEPSAWGKTRLGLYTASTNTTDHPHDACGALPESTPDLANKIVLIHPGNCSYTTQAKNLAALGAKY…	852	none	0.15	cyto 12, nucl 10, pero 4, extr 3, mito_pero 3	cyto	Cluster00057	P29141|SUBV_BACSU|6e-30	3662|PspB(notPD0218)|PHI:3662|Q87ET0|2371|Xylellafastidiosa|Increasedvirulence(Hypervirulence)|2e-06	PF02225|PA domain|4.0E-5;PF00082|Subtilase family|3.0E-40;PF06280|Fn3-like domain|1.5E-17;	PTHR10795:SF363||5.3E-69;PTHR10795:SF363||5.3E-69;PTHR10795||5.3E-69;PTHR10795||5.3E-69;PTHR10795||5.3E-69;PTHR10795:SF363||5.3E-69;	SSF52743||7.2E-63;SSF52743||7.2E-63;	-	-	PS00136|Serine proteases, subtilase family, aspartic acid active site.|-;PS00137|Serine proteases, subtilase family, histidine active site.|-;	-	-	-	G3DSA:3.50.30.30||4.0E-4;G3DSA:3.40.50.200||8.5E-69;G3DSA:3.40.50.200||8.5E-69;	-	-	PR00723|Subtilisin serine protease family (S8) signature|2.84E-21;PR00723|Subtilisin serine protease family (S8) signature|2.84E-21;PR00723|Subtilisin serine protease family (S8) signature|2.84E-21;
g774.t1	Dreco_g774	MSIRSLAFGGFLLLASPVLGRTDLTGCTHYETVVKPSGMAAYASRVWYVPDTYELCEVLDCGGGRAPPKTTVPGCPQYKGSESYQPKFTDPASIKPDTVQASVTSAAQAASSAAAASSASAAASPSSSSAQPSSTSSSSETTSASTTASITTSTTASASITASATTSGSASSSGSALPSGSGVRTNGTSSLTAAGVAVDGASAVMGSLFAAALAVGLGLL	0.575	21	0.712	21	0.942	14	0.884	0.805	Y	0.45	SignalP-noTM		extr 26	TDLTGCTHYETVVKPSGMAAYASRVWYVPDTYELCEVLDCGGGRAPPKTTVPGCPQYKGSESYQPKFTDPASIKPDTVQASVTSAAQAASSAAAASSASAAASPSSSSAQPSSTSSSSETTSASTTASITTSTTASASITASATTSGSASSSGSALPSGSGVRTNGTSSLTAAGVAVDGASAVMGSLFAAALAVGLGLL	199	none	0.16	plas 14, mito 7, cysk_plas 7, cyto 5	plas	Cluster04752	-	-	-	-	-	-	-	-	-	-	-	-	-	-	-
g784.t1	Dreco_g784	MFNKAFSAAAVALAASSVVSAQTFSTCNPMKESCPADPAFCAKVDCDLRKGDCEMFKPLKGTTVDHTDKGAVFSIEKDLQGPTLRTPKYIFYGRVDVEVQAAKGQGIVTSVVLQSDDLDEIDWEWVGTNSTNVLSNYFSKGNTSIYDRGKDHPVDDALGRFHTYSIEWTPDALVWLIDNVEVRRLNNVGLFGSSAFPQSPMQLRIGTWVGGGKDTAPDTVKWAGGYTNFDDGPFLGYYKKVTVVDYAGTGKPCQGGVKEYVYSDRSGQSKSINVVGGSDEDTSSESASATATSVESTSSATELAKSSHTSVASEPTSQSTAVARPAGNSTGTHTGTHTGPAPSSTGVYATPSTLPSSGAERGAVFASFFLAVAGVLVAIL	0.78	22	0.783	22	0.87	3	0.788	0.786	Y	0.45	SignalP-noTM		extr 27	TFSTCNPMKESCPADPAFCAKVDCDLRKGDCEMFKPLKGTTVDHTDKGAVFSIEKDLQGPTLRTPKYIFYGRVDVEVQAAKGQGIVTSVVLQSDDLDEIDWEWVGTNSTNVLSNYFSKGNTSIYDRGKDHPVDDALGRFHTYSIEWTPDALVWLIDNVEVRRLNNVGLFGSSAFPQSPMQLRIGTWVGGGKDTAPDTVKWAGGYTNFDDGPFLGYYKKVTVVDYAGTGKPCQGGVKEYVYSDRSGQSKSINVVGGSDEDTSSESASATATSVESTSSATELAKSSHTSVASEPTSQSTAVARPAGNSTGTHTGTHTGPAPSSTGVYATPSTLPSSGAERGAVFASFFLAVAGVLVAIL	358	none	0.02	cyto 9, mito 9, cyto_mito 9, plas 6	cyto	Cluster00851	D4B4J2|CRH12_ARTBC|3e-61	-	PF00722|Glycosyl hydrolases family 16|4.2E-40;	PTHR10963:SF27||1.7E-81;PTHR10963||1.7E-81;	SSF49899||6.21E-50;	-	-	-	-	-	-	G3DSA:2.60.120.200||1.6E-54;	-	PIRSF037299||7.5E-110;	-
g789.t1	Dreco_g789	MTSVRSAAAALLALAAIINAQIKLQSLSFFSILGNTAITNTGATTVDGNIGIFPNNVVEGFPPGVVHDGAIYKIGPKTGQAKDDLVVAFILASSLRPTATVPTELGNTAYGPGVYLIGESGNASLNGTLTLHTDDPNKIWVFQMRNSLAIGNNARVVLANGSASCNVFWKVGGVVRMGTSVDVSGIFLSVGSIHVGSGGTINGGLYTLNDQVSLDSDTIHRCVPPPSTTSTAATNLDAATPPPPEATTTSTTARDAATTADPSATADAPATDATSMDTTTAHVTTSAASTDGTGAVAATTSTTATASTTDAETRCTGGTTASKATPPATRGGRGDRVVATTVITFTVTCPVAPTVITSCGQTFYITSPGATVLRATSTATLQNAPACKECATSPPYRGT…	0.412	21	0.548	21	0.844	4	0.719	0.64	Y	0.45	SignalP-noTM		extr 25	IKLQSLSFFSILGNTAITNTGATTVDGNIGIFPNNVVEGFPPGVVHDGAIYKIGPKTGQAKDDLVVAFILASSLRPTATVPTELGNTAYGPGVYLIGESGNASLNGTLTLHTDDPNKIWVFQMRNSLAIGNNARVVLANGSASCNVFWKVGGVVRMGTSVDVSGIFLSVGSIHVGSGGTINGGLYTLNDQVSLDSDTIHRCVPPPSTTSTAATNLDAATPPPPEATTTSTTARDAATTADPSATADAPATDATSMDTTTAHVTTSAASTDGTGAVAATTSTTATASTTDAETRCTGGTTASKATPPATRGGRGDRVVATTVITFTVTCPVAPTVITSCGQTFYITSPGATVLRATSTATLQNAPACKECATSPPYRGTAIGMRCPACTSRGPLGSKTGQ…	446	none	0.08	extr 13, plas 4, pero 4, E.R. 3.5, E.R._mito 3.5, lyso 3, mito 2.5, cyto_pero 2.5, cyto_plas 2.5	extr	Cluster14082	-	-	PF11999|Protein of unknown function (DUF3494)|2.0E-42;	-	-	-	-	-	-	-	-	-	-	-	-
g858.t1	Dreco_g858	MKAFASFLAAAGSAAAVTIAEINGNRFLSPLDGKSVTDVTGVVTAVSKNGIYLRSAEPDDDPVTSEGLFVYGSSAAQKVEVGDLVSLDGVVKEYRAKTEHIYLTQLTDPTNIVVVSSSHKVKPLVIGKDTLPPPTRDFSKLDKGGIFGVPNAVDTVSAANPKLDPATYGLDFWESLVGELVILKDVYQTSRPSKYGDVWVRGSWAVTGINSHGGVTMLDGDANPETVIIGTPLDGSSNPIDTKMGDYLGDVTGVVSNAFGFYRVLPLTSVSPLRNASATYSAVSFSGDGTCKAITVADYNAENLAPDSAHMPRVVDQIVHKLLLPDLIFLQEIQDGSGPTDDGVVSANVTLATLTQGIEEVSSVVYQWAEVDPVDGEDGGQPGGNIRCAYLYRPDVVEL…	0.316	17	0.453	17	0.777	1	0.603	0.534	Y	0.45	SignalP-noTM		extr 22, cyto 3.5, cyto_nucl 2.5	TIAEINGNRFLSPLDGKSVTDVTGVVTAVSKNGIYLRSAEPDDDPVTSEGLFVYGSSAAQKVEVGDLVSLDGVVKEYRAKTEHIYLTQLTDPTNIVVVSSSHKVKPLVIGKDTLPPPTRDFSKLDKGGIFGVPNAVDTVSAANPKLDPATYGLDFWESLVGELVILKDVYQTSRPSKYGDVWVRGSWAVTGINSHGGVTMLDGDANPETVIIGTPLDGSSNPIDTKMGDYLGDVTGVVSNAFGFYRVLPLTSVSPLRNASATYSAVSFSGDGTCKAITVADYNAENLAPDSAHMPRVVDQIVHKLLLPDLIFLQEIQDGSGPTDDGVVSANVTLATLTQGIEEVSSVVYQWAEVDPVDGEDGGQPGGNIRCAYLYRPDVVELYKPNQGGSLDANKVLDG…	587	none	0.06	cyto_nucl 11.3333, cyto 11, nucl 10.5, cyto_pero 6.33333, extr 4, cysk 4	cyto_nucl	Cluster03258	-	3078|ssnA|PHI:3078|C5VVJ6|1307|Streptococcussuis|reducedvirulence|3e-61	PF03372|Endonuclease/Exonuclease/phosphatase family|2.3E-9;	PTHR33607||3.3E-173;PTHR33607||3.3E-173;PTHR33607:SF1||3.3E-173;PTHR33607:SF1||3.3E-173;	SSF56219||1.7E-25;	-	-	-	-	-	-	G
g860.t1	Dreco_g860	MARSRSSLALGLGLLCWITCLFAPLAFVQNVHADDSVENYGTVIGIDLGTTYSCVGVMQKGKVEILVNDQGHRITPSYVAFTDDERLVGDSAKNQAAANPTNTIFDIKRLIGRKFADEHVQSDIKHFPFKVINKGGKPVVKVNVKNEAKELTPEEISAMILGKMKEVAESYLGKKVTHAVVTVPAYFNDNQRQATKDAGIIAGLNVLRIVNEPTAAAIAYGLDKTEGERQIIVYDLGGGTFDVSLLSIDQGVFEVLATAGDTHLGGEDFDQRIINELAKKYNDQNNVDVTKDLKAMGKLKREAEKAKRTLSSQMSTRIEIEAFFEGKDFSEVLTRTKFEILNADLFKKTIKPVEKVLKDANVKKSEINDIVLVGGSTRIPKVQALIEDFFKKAASKGIN…	0.871	34	0.827	34	0.986	20	0.844	0.836	Y	0.45	SignalP-noTM		extr 16, E.R. 7, nucl 2	DSVENYGTVIGIDLGTTYSCVGVMQKGKVEILVNDQGHRITPSYVAFTDDERLVGDSAKNQAAANPTNTIFDIKRLIGRKFADEHVQSDIKHFPFKVINKGGKPVVKVNVKNEAKELTPEEISAMILGKMKEVAESYLGKKVTHAVVTVPAYFNDNQRQATKDAGIIAGLNVLRIVNEPTAAAIAYGLDKTEGERQIIVYDLGGGTFDVSLLSIDQGVFEVLATAGDTHLGGEDFDQRIINELAKKYNDQNNVDVTKDLKAMGKLKREAEKAKRTLSSQMSTRIEIEAFFEGKDFSEVLTRTKFEILNADLFKKTIKPVEKVLKDANVKKSEINDIVLVGGSTRIPKVQALIEDFFKKAASKGINPDEAVAFGAAVQAGVLSGEEGTEEIVLMDVNPLT…	630	none	0.11	cyto 23, cysk 4, nucl 2, mito 2, cysk_plas 2, mito_nucl 2	cyto	Cluster02114	P78695|GRP78_NEUCR|0	2058|PHI:2058|LHS1|MGG_06648.5|148305|Magnaportheoryzae(related:Magnaporthegrisea)|Reducedvirulence|6e-28	PF00012|Hsp70 protein|9.5E-262;	PTHR19375||0.0;	SSF100934||2.49E-23;SSF53067||1.83E-71;SSF53067||2.41E-63;SSF100920||2.35E-63;	-	-	PS00329|Heat shock hsp70 proteins family signature 2.|-;PS00297|Heat shock hsp70 proteins family signature 1.|-;PS01036|Heat shock hsp70 proteins family signature 3.|-;	-	-	Coil||-;	G3DSA:3.90.640.10||1.6E-27;G3DSA:2.60.34.10||1.6E-64;G3DSA:3.30.30.30||3.1E-34;G3DSA:3.30.420.40||6.5E-67;G3DSA:3.30.420.40||6.5E-67;G3DSA:3.30.420.40||1.6E-37;G3DSA:3.30.420.40||1.6E-37;G3DSA:1.20.1270.10||1.2E-39;	-	-	PR00301|70kDa heat shock protein signature|5.3E-82;PR00301|70kDa heat shock protein signature|5.3E-82;PR00301|70kDa heat shock protein signature|5.3E-82;PR00301|70kDa heat shock protein signature|5.3E-82;PR00301|70kDa heat shock protein signature|5.3E-82;PR00301|70kDa heat shock protein signature|5.3E-82;PR00301|70kDa heat shock protein signature|5.3E-82;PR00301|70kDa heat shock protein signature…
g879.t1	Dreco_g879	MKFSGLALVAFIASAIAAPGYSGDNNRSPGHNVGHPGNTRPGNNYGNNRGSNYGNNYGNNHGNNRGNNYGNNRGNNRGNNYGNNRGNNRGNNHRVSPNRHRRPNPFNWPSQGPWGRQGYCNKNAAIYCLDEKHLVVDIDVDANLLGLDIDVDVDVDVALFNTKKCYQTACCKRGCQRGRYLDTNQYQCNHY	0.507	18	0.676	18	0.924	11	0.897	0.796	Y	0.45	SignalP-noTM		extr 26	PGYSGDNNRSPGHNVGHPGNTRPGNNYGNNRGSNYGNNYGNNHGNNRGNNYGNNRGNNRGNNYGNNRGNNRGNNHRVSPNRHRRPNPFNWPSQGPWGRQGYCNKNAAIYCLDEKHLVVDIDVDANLLGLDIDVDVDVDVALFNTKKCYQTACCKRGCQRGRYLDTNQYQCNHY	173	none	0.19	nucl 15, extr 10, cyto_nucl 10	nucl		-	-	-	-	-	-	-	-	-	-	-	-	-	-	-
g880.t1	Dreco_g880	MHSYSVLAAALTQLLLVTSASGAVLPGSIVPDDSSPSSKHVVRRYEDKKVVFKMDYFIQLINHDDPPFGYFKQRYWWNDEHYKGKGSPIILKAPSEGNGEDDLAYLTNDTLLGQFAEAVGGAIIVLEHRYWGKSSPYPELTAETLQYLNVGNATADLAYFARNVFLDFDKTQSSRPSKAPWVLSGASYSGALAAWTNAIRPGTFWAYHCSSATVQALPDMSDSFDIAEAAMPRNCSADFQKMIKHVDDVLTKKNYLARKYLKNQFGLGAMDDDNSFAAVLALGPLRWQGAQFYTGYTELHRMCDYVENQWPGSTSNPAGAEGVGLHKALEGYGRFFQEVIIPENCDMKELAKNNDTASCFSTDNVETSPVYSDLSVNNTMGRQWRWLSCNEPLESWMTG…	0.711	23	0.798	23	0.956	14	0.895	0.85	Y	0.45	SignalP-noTM		extr 21, mito 3, cyto 2	VLPGSIVPDDSSPSSKHVVRRYEDKKVVFKMDYFIQLINHDDPPFGYFKQRYWWNDEHYKGKGSPIILKAPSEGNGEDDLAYLTNDTLLGQFAEAVGGAIIVLEHRYWGKSSPYPELTAETLQYLNVGNATADLAYFARNVFLDFDKTQSSRPSKAPWVLSGASYSGALAAWTNAIRPGTFWAYHCSSATVQALPDMSDSFDIAEAAMPRNCSADFQKMIKHVDDVLTKKNYLARKYLKNQFGLGAMDDDNSFAAVLALGPLRWQGAQFYTGYTELHRMCDYVENQWPGSTSNPAGAEGVGLHKALEGYGRFFQEVIIPENCDMKELAKNNDTASCFSTDNVETSPVYSDLSVNNTMGRQWRWLSCNEPLESWMTGGPNMESGIVSTLFTSDSLRSECE…	517	none	0.19	nucl 14.5, cyto_nucl 13, cyto 10.5, mito 2, golg 2	nucl	Cluster00346	D4AYS6|A1345_ARTBC|2e-28	-	PF05577|Serine carboxypeptidase S28|6.8E-44;	PTHR11010:SF23||1.3E-134;PTHR11010||1.3E-134;	SSF53474||2.74E-8;SSF53474||2.74E-8;	-	-	-	-	-	-	G3DSA:3.40.50.1820||4.2E-7;	-	-	-
g893.t1	Dreco_g893	MPSLSAFALVAAAALPLVNAAPHKREVLADTIGPAPYRNLPPLGDAESVDLDLSSFKAFNIPENTDKYKCHATCGILIRVSAVKKDACHHPWALPLASYCFGPCPDADKSSQYSTATKFRDECNFDLGRAAREAKFEPPVTPKDDEKDIKGQTLTAETPPSRAALDAAVAMPKVTKDERNTKGAPVTLPADGVTSRFSGSDSSTNTTGGAVKPKRPDSCLDPRHRSRSA	0.847	21	0.812	21	0.909	1	0.765	0.787	Y	0.45	SignalP-noTM		extr 23, mito 2	PHKREVLADTIGPAPYRNLPPLGDAESVDLDLSSFKAFNIPENTDKYKCHATCGILIRVSAVKKDACHHPWALPLASYCFGPCPDADKSSQYSTATKFRDECNFDLGRAAREAKFEPPVTPKDDEKDIKGQTLTAETPPSRAALDAAVAMPKVTKDERNTKGAPVTLPADGVTSRFSGSDSSTNTTGGAVKPKRPDSCLDPRHRSRSA	208	none	0.24	extr 15, nucl 9, cyto_nucl 8, cyto 5	extr		-	-	-	-	-	-	-	-	-	-	-	-	-	-	-
g894.t1	Dreco_g894	MRSFRTVLAVGLAVASAVVAQHDSKSGKSAGNPSTSSVTDNNMGPAAFMWPPDRVWSGDMDNTAPCGSRAAPGNRTKFPLTGGAVALVAQDDYYNSKISIAYSNDPTSNTDFTTLVDSRDINDLNPGHTCAKIPDAPSTVTAGTNATIQIIYKADWDAPHNQTFYACADITFVALNDFNMKIPCFNATEPGEDDKKMANDEVNGKKSSSSEPSGSGSAANSAGGSAGMSSGAMAGTIIGSLAGAFILSGAALYFYRRREQKKRSLRLARMEENARMGHYSLNKVVSQGSL	0.471	21	0.628	21	0.901	12	0.833	0.738	Y	0.45	SignalP-noTM		extr 24, E.R. 2	HDSKSGKSAGNPSTSSVTDNNMGPAAFMWPPDRVWSGDMDNTAPCGSRAAPGNRTKFPLTGGAVALVAQDDYYNSKISIAYSNDPTSNTDFTTLVDSRDINDLNPGHTCAKIPDAPSTVTAGTNATIQIIYKADWDAPHNQTFYACADITFVALNDFNMKIPCFNATEPGEDDKKMANDEVNGKKSSSSEPSGSGSAANSAGGSAGMSSGAMAGTIIGSLAGAFILSGAALYFYRRREQKKRSLRLARMEENARMGHYSLNKVVSQGSL	269	none	0.43	plas 14, extr_plas 8.5, cyto 7, E.R. 5, nucl 4, cyto_mito 4	plas	Cluster01753	-	-	-	PTHR34992||1.1E-26;PTHR34992:SF1||1.1E-26;	-	-	-	-	-	-	-	-	-	-	-
g896.t1	Dreco_g896	MGFHHFSLLVSLVLTCTECFIIPVTFPGNAQESSALALISPSKADQLPSPSVLSSLEQRGPATANGRNLNYIATGAFEFQAPKAGIASNSTAGDIKRPTVTIHRSVNSTFVYERYFLLTFITTSIHSPSYAAAIPSSTLNSTMVSQDIFAEPIDCKAPPSSVAVRDDHPVPRKGIQSQAPLQTNKFYSNFFLGDQLGPTYTFPYSVQWAGGKGVTASWGLSCSHIEPHQRVFGQERHNGAAAYYLNPVGIQSMVMSAKELGNDTSLAVDSITAFSARVSLSKDRHSPPAISFPLVQGMAYITAQYDGATPVLRSGVFFRTVSQVIRQPKEHVTKFTFHLEDGTLWRVYAWRTKGDDLDLAVINNGLAEATKPFHGIIQVCKDPATPGSEAMLDDGAGIY…	0.599	20	0.741	20	0.966	4	0.917	0.836	Y	0.45	SignalP-noTM		extr 23, cyto 1.5, cyto_nucl 1.5	IIPVTFPGNAQESSALALISPSKADQLPSPSVLSSLEQRGPATANGRNLNYIATGAFEFQAPKAGIASNSTAGDIKRPTVTIHRSVNSTFVYERYFLLTFITTSIHSPSYAAAIPSSTLNSTMVSQDIFAEPIDCKAPPSSVAVRDDHPVPRKGIQSQAPLQTNKFYSNFFLGDQLGPTYTFPYSVQWAGGKGVTASWGLSCSHIEPHQRVFGQERHNGAAAYYLNPVGIQSMVMSAKELGNDTSLAVDSITAFSARVSLSKDRHSPPAISFPLVQGMAYITAQYDGATPVLRSGVFFRTVSQVIRQPKEHVTKFTFHLEDGTLWRVYAWRTKGDDLDLAVINNGLAEATKPFHGIIQVCKDPATPGSEAMLDDGAGIYPLTLSLSGTASGSEGTYSFN…	835	none	0.25	nucl 31.5, cyto_nucl 16.5	nucl	Cluster05371	D4AZ24|ENG1_ARTBC|0	-	PF03639|Glycosyl hydrolase family 81|4.2E-281;	PTHR31983||3.3E-247;PTHR31983:SF0||3.3E-247;	-	-	-	-	-	-	-	-	-	-	-
g902.t1	Dreco_g902	MFKMAHPFNLLLRCLVQVCLLVAPASATNDAHHSPLVTVRNGTYAGVHSPGYRQDFFLGIPYAQVPGRFTVAKGLRASWNGIRNAGKYPPHCVGYGSDHVGYETSEDCLFLNVIRPAGVSAAANLPVAVWIHGGGLLVGGSADKRYNLSFIVERSVDMGTPIIGVSLNYRLSAYGFLPGREALNAGATNIGFRDQRLALRWLQENIDAFGGSPEKVTIFGESAGAESVSAQVLAYNGRDDQLFRGAIGQSGFGSVIRRSPYNGGFNETERLQASYDNLVSNTSCARFIGTAESLDCIRKAPIDELHRALNGSDSGPWPPTLDGDFFRDYTTHQLRKGNFRKVPVMIGINTDEGGNFSLDNGKVDTDEDVRMLLRRLLLSKQTEDDVDALVKELMHLYPN…	0.735	28	0.812	28	0.976	8	0.901	0.86	Y	0.45	SignalP-noTM		extr 25	NDAHHSPLVTVRNGTYAGVHSPGYRQDFFLGIPYAQVPGRFTVAKGLRASWNGIRNAGKYPPHCVGYGSDHVGYETSEDCLFLNVIRPAGVSAAANLPVAVWIHGGGLLVGGSADKRYNLSFIVERSVDMGTPIIGVSLNYRLSAYGFLPGREALNAGATNIGFRDQRLALRWLQENIDAFGGSPEKVTIFGESAGAESVSAQVLAYNGRDDQLFRGAIGQSGFGSVIRRSPYNGGFNETERLQASYDNLVSNTSCARFIGTAESLDCIRKAPIDELHRALNGSDSGPWPPTLDGDFFRDYTTHQLRKGNFRKVPVMIGINTDEGGNFSLDNGKVDTDEDVRMLLRRLLLSKQTEDDVDALVKELMHLYPNVQSVGIPSLIRWPHIIQPNDTMAQMLGA…	564	none	0.12	nucl 11, cyto 9, mito 5, pero 4	nucl	Cluster14107	P32948|LIP4_CANRU|1e-66	541|PHI:541|LIP1|AAU87359|332648|Botrytiscinerea|Unaffectedpathogenicity|5e-60	PF00135|Carboxylesterase family|7.2E-86;	PTHR11559:SF206||1.1E-186;PTHR11559:SF206||1.1E-186;PTHR11559||1.1E-186;PTHR11559||1.1E-186;	SSF53474||5.7E-105;	-	-	PS00122|Carboxylesterases type-B serine active site.|-;PS00941|Carboxylesterases type-B signature 2.|-;	-	-	-	G3DSA:3.40.50.1820||1.1E-121;	-	-	-
g935.t1	Dreco_g935	MTMATATLHHHGIHRLVSIVILLLVALASGTAPGDKYLIGVGKADITGPVVEIGFAGYANSEQVGSGLRQRLHSRAFVVANVRNPKDCFVYLVLDTQSGDTAIRYGVLEGLKALGNDYNVYGHNNLALTGTHSHAGPGGWFNYLLPQFTTLGFSQQSYQAIVDGAVLSIKRAHQSLQEGYLDVGTTVIKDGAINRSLHSYLANPKAERDRYDATTDTTMTLLRFRRVSDGKNLGVLTWFPVHGTSLLGNNTHAAGDNKGVAAWMLEESLNGDSSAADGFVAGFSQANVGDTSPNVLGAYCDDGSGQECSFQSSTCADGKSQKCHGRGPEFRTLDLGVKSCYEIGRRQFDGAKRIYDSMDASGTAIVGPTVKAFHFFHDMRYWEFTLPNGQKAKTCPAAL…	0.446	31	0.647	31	0.979	23	0.874	0.77	Y	0.45	SignalP-noTM		extr 26	APGDKYLIGVGKADITGPVVEIGFAGYANSEQVGSGLRQRLHSRAFVVANVRNPKDCFVYLVLDTQSGDTAIRYGVLEGLKALGNDYNVYGHNNLALTGTHSHAGPGGWFNYLLPQFTTLGFSQQSYQAIVDGAVLSIKRAHQSLQEGYLDVGTTVIKDGAINRSLHSYLANPKAERDRYDATTDTTMTLLRFRRVSDGKNLGVLTWFPVHGTSLLGNNTHAAGDNKGVAAWMLEESLNGDSSAADGFVAGFSQANVGDTSPNVLGAYCDDGSGQECSFQSSTCADGKSQKCHGRGPEFRTLDLGVKSCYEIGRRQFDGAKRIYDSMDASGTAIVGPTVKAFHFFHDMRYWEFTLPNGQKAKTCPAALGYSFAAGTSDWPGAFDFTQGDSGEPKANPIW…	700	none	0.12	cyto 19.5, cyto_nucl 17.5, nucl 12.5	cyto	Cluster00410	Q29C43|NCASE_DROPS|1e-153	-	PF04734|Neutral/alkaline non-lysosomal ceramidase, N-terminal|5.2E-215;PF17048|Neutral/alkaline non-lysosomal ceramidase, C-terminal|3.1E-54;	PTHR12670:SF5||0.0;PTHR12670||0.0;	-	-	-	-	-	-	-	-	-	-	-
g937.t1	Dreco_g937	MVQLKAILSAALLVATVAGDDVCHPDPNSMMNRILKYEYMDEDKQKVMTGPIFADLVPWIKLAGNQTESLHLEGPYIGRRLIELVCESWTRYFESKLNKPYQDLEKVLIIEDLAMNLRAVQKNLCRKQ	0.686	20	0.78	20	0.946	9	0.89	0.839	Y	0.45	SignalP-noTM		extr 9, cyto 5, E.R. 5, nucl 4, golg 3, cyto_mito 3	DVCHPDPNSMMNRILKYEYMDEDKQKVMTGPIFADLVPWIKLAGNQTESLHLEGPYIGRRLIELVCESWTRYFESKLNKPYQDLEKVLIIEDLAMNLRAVQKNLCRKQ	108	none	0.12	cyto 18.5, cyto_nucl 11.5, extr 5, nucl 3.5, mito 3	cyto		-	-	-	-	-	-	-	-	-	-	-	-	-	-	-
g957.t1	Dreco_g957	MMIPNIAVAALALAAAPLAVAQNPYPITGVPIPPENNGAAPMRLNINTLQANGGPMWDLYIRANRAMQARDVNNPLGWFQIEGASLLTRTKQEALFVSWHRPYVLLYEQALVMNAKRIALQYPQSVRAQYVAAANRLRAPYWDWASNPTVPPATVPERVTIMIPDGNRNRVVPRAVRNPLTNYKVPDAARQFDGFQNLQQTTRCPSPQRYPESANTLLARRPYRSWIYDLFTRGTTFSEFAVSGGNIVSLELIHNGVHWDGACGQQFLSPDLSAFDPLFMLHHTNIDRFWSYWQAIHPTQGIFTNSYSGQSRWATPGGTTINSASALQPFYMANGSPHTTQTVRNIRNFGYTYEGLEYWRMSPAQLTQSATTLINRMYGPTTGPTRGQTRGQGIARRAE…	0.782	22	0.827	22	0.927	4	0.874	0.853	Y	0.45	SignalP-noTM		extr 21, plas 4	NPYPITGVPIPPENNGAAPMRLNINTLQANGGPMWDLYIRANRAMQARDVNNPLGWFQIEGASLLTRTKQEALFVSWHRPYVLLYEQALVMNAKRIALQYPQSVRAQYVAAANRLRAPYWDWASNPTVPPATVPERVTIMIPDGNRNRVVPRAVRNPLTNYKVPDAARQFDGFQNLQQTTRCPSPQRYPESANTLLARRPYRSWIYDLFTRGTTFSEFAVSGGNIVSLELIHNGVHWDGACGQQFLSPDLSAFDPLFMLHHTNIDRFWSYWQAIHPTQGIFTNSYSGQSRWATPGGTTINSASALQPFYMANGSPHTTQTVRNIRNFGYTYEGLEYWRMSPAQLTQSATTLINRMYGPTTGPTRGQTRGQGIARRAEKQNIERFFVHITAERGDLQRPC…	549	none	0.39	nucl 13, cyto_nucl 12.5, cyto 10, extr 6	nucl	Cluster00059	P00440|TYRO_NEUCR|1e-39	-	PF00264|Common central domain of tyrosinase|3.5E-33;	PTHR11474||2.5E-32;PTHR11474||2.5E-32;PTHR11474:SF32||2.5E-32;PTHR11474:SF32||2.5E-32;	SSF48056||1.64E-42;	-	-	PS00498|Tyrosinase and hemocyanins CuB-binding region signature.|-;	-	-	-	G3DSA:1.10.1280.10||1.1E-52;	-	-	PR00092|Tyrosinase copper-binding domain signature|2.2E-9;PR00092|Tyrosinase copper-binding domain signature|2.2E-9;PR00092|Tyrosinase copper-binding domain signature|2.2E-9;
g960.t1	Dreco_g960	MRSTTPMLSCSWTAVLCLLAALVCLLHPAAAVKEHDFKKCDQSGFCKRNRAYADNAASQSSTWNSPYRILPGSSSFKDGQLHATILKTIDDKGKTARLPMIVSFLKSGAVRVTVDEERRQKKDIELRHNSPARKERYNEAENLVIVGGLDLDKEARIVFQDEAQMNIEYGAKLEAVVKMSPFEVEFRRDGVTHIKFNDRGLLNMEHWRPKVDKPEVPEGQESQGGEAKQDEGEGDKGDEESTWWDETFGGNTDTKPRGPESVALDISFVEYEHVYGIPEHAGPLSLKQTRGGEGNYDEPYRLYNADVFEYILDSPMTLYGSIPFMQAHRKGSSVGVFWLNAAETWVDIIKGRSPSNPHNLGPGAKANTHTHWISESGLLDVFVFLGPTPHDLTRQYGEL…	0.869	32	0.915	32	0.994	19	0.959	0.939	Y	0.45	SignalP-noTM		extr 14, golg 4, plas 3, E.R. 3, vacu 2	KEHDFKKCDQSGFCKRNRAYADNAASQSSTWNSPYRILPGSSSFKDGQLHATILKTIDDKGKTARLPMIVSFLKSGAVRVTVDEERRQKKDIELRHNSPARKERYNEAENLVIVGGLDLDKEARIVFQDEAQMNIEYGAKLEAVVKMSPFEVEFRRDGVTHIKFNDRGLLNMEHWRPKVDKPEVPEGQESQGGEAKQDEGEGDKGDEESTWWDETFGGNTDTKPRGPESVALDISFVEYEHVYGIPEHAGPLSLKQTRGGEGNYDEPYRLYNADVFEYILDSPMTLYGSIPFMQAHRKGSSVGVFWLNAAETWVDIIKGRSPSNPHNLGPGAKANTHTHWISESGLLDVFVFLGPTPHDLTRQYGELTGYSAMPQEFAIGYHQCRWNYKSDDDVRDVDR…	947	none	0.33	cyto_nucl 19.5, nucl 16, cyto 15	cyto_nucl	Cluster05511	Q9US55|GLU2A_SCHPO|0	1071|PHI:1071|Gas1|CAF05793|5270|Ustilagomaydis|Lossofpathogenicity|0.0	PF01055|Glycosyl hydrolases family 31|7.0E-124;PF13802|Galactose mutarotase-like|2.3E-24;	PTHR22762||0.0;PTHR22762:SF54||0.0;PTHR22762:SF54||0.0;PTHR22762:SF54||0.0;PTHR22762||0.0;PTHR22762||0.0;	SSF51445||3.61E-81;SSF74650||1.98E-13;SSF74650||1.98E-13;SSF51011||5.25E-12;	-	-	PS00129|Glycosyl hydrolases family 31 active site.|-;	-	-	-	-	-	-	-
g964.t1	Dreco_g964	MVRNGGVALLLSLSLAWSVGVDCLAIESTTSSVENEMETKPETVTESPDRLYRVDTRTPATIWDAGGFLPWAALEDPEADFSVYDHALGPSNQSVYVSTTSDLDWALAYAEGIQGYIYAIDPTENMFCVADSLRANDTDIQQQLEKHLRQKEWVALGGIRGDQISGVARAPLNGQNYDVKFSPFNGYNKSKYSDGHAASGPQPELAGFPLDGQAGLELRPQKVLSAPPLREAGMKLMDTAMESGWEKPADSQGRSESIKDKETGMKMTGKEVPASARLRGGDADGRMPANDKKITMCSISPMTLEKRRGRGGGSGRSFFKRPAFSSRQGRPAGTRNRGRKTCYGLASAIEIAFWAIIEQMEKSPIDWDKASTSDGTNGTRLNFPDEEPSPRVSAFVPDE…	0.451	24	0.643	24	0.982	14	0.915	0.79	Y	0.45	SignalP-noTM		extr 9, cyto 4, golg 4, mito 3, plas 2, cyto_nucl 2, E.R. 2, vacu 2	AIESTTSSVENEMETKPETVTESPDRLYRVDTRTPATIWDAGGFLPWAALEDPEADFSVYDHALGPSNQSVYVSTTSDLDWALAYAEGIQGYIYAIDPTENMFCVADSLRANDTDIQQQLEKHLRQKEWVALGGIRGDQISGVARAPLNGQNYDVKFSPFNGYNKSKYSDGHAASGPQPELAGFPLDGQAGLELRPQKVLSAPPLREAGMKLMDTAMESGWEKPADSQGRSESIKDKETGMKMTGKEVPASARLRGGDADGRMPANDKKITMCSISPMTLEKRRGRGGGSGRSFFKRPAFSSRQGRPAGTRNRGRKTCYGLASAIEIAFWAIIEQMEKSPIDWDKASTSDGTNGTRLNFPDEEPSPRVSAFVPDEVKEALDQQRAESGRISTDNEIVRE…	453	306 - KRRGRGGGSGRSFFKRPAFSSRQGRPAGTRNRGR - 339	0.5	nucl 20, cyto_nucl 15, cyto 8	nucl	Cluster00573	P13810|E2AA_ECOLX|2e-08	698|PHI:698|CtxA|AAF94614|243277|Vibriocholerae|Reducedvirulence|9e-10	PF01375|Heat-labile enterotoxin alpha chain|9.9E-17;	-	SSF56399||8.63E-28;	-	-	-	-	-	-	G3DSA:3.90.210.10||1.6E-38;	-	-	-
g968.t1	Dreco_g968	MRVTTSVVVLGSLASAVAAAAAAAGSFQFPESVPLHSRQTQGPSYQCHANCGYAIQNSVREGYCNDDAWLDLLDGCLDCALEYNIWQHYGNKVGAAAEKCGLDASPRQPGNGQSSAAPTSAAPATTVTGTSSAVVVQPTTATGASSAVIVQPTTATGASSAVVVQPTTAVSSALRPSPPSFSPTKVSTIAGSGVTTSASAPVTRIGHGNTCAFQLRYCIGGKIARH	0.338	20	0.549	20	0.954	14	0.901	0.739	Y	0.45	SignalP-noTM		extr 27	AAAAGSFQFPESVPLHSRQTQGPSYQCHANCGYAIQNSVREGYCNDDAWLDLLDGCLDCALEYNIWQHYGNKVGAAAEKCGLDASPRQPGNGQSSAAPTSAAPATTVTGTSSAVVVQPTTATGASSAVIVQPTTATGASSAVVVQPTTAVSSALRPSPPSFSPTKVSTIAGSGVTTSASAPVTRIGHGNTCAFQLRYCIGGKIARH	206	none	0.06	nucl 12.5, cyto_nucl 12.1667, cyto 10.5, extr 7, cyto_pero 6.83333, mito_nucl 6.83333	nucl		-	-	-	-	-	-	-	-	-	-	-	-	-	-	-
g972.t1	Dreco_g972	MTKHALALAAGLVAGVNAFWRMECPGRVGLARIDPIVNPNDVSGHVHTIHGSSGFSATSSTADLVAGDCTSCRVTQDKSSYWHPALYFQDAATGQFELVEQVGGMLAYYLLNGQNITAFPSGFQMISGDNMRRNYTVGDPSKPDPGKSQWQALGQTTQDALSQRAVGFNCLNYAGTPEATLFRHFLPDKSYLDANCMNGIRLELMFPSCWKGGNALDSPNHKDHVAFPDLVIDGTCPPGFPVRLPSLLFEVIWNTYAFKNRNGKFVFSNTDTTGFGYHGDFLTGWDPGFLQKAIDTCTNPSGRIEDCKVFNVVDQGTATSCKMKAPLPQSLADENVKGPMNKLPGGMTGKSPGPVANIGQQKDANAASPAAATPAPAGQTPAAGQAPAGQAPGQAPGQA…	0.62	19	0.662	19	0.828	4	0.71	0.688	Y	0.45	SignalP-noTM		extr 23, mito 1, plas 1, pero 1, vacu 1	WRMECPGRVGLARIDPIVNPNDVSGHVHTIHGSSGFSATSSTADLVAGDCTSCRVTQDKSSYWHPALYFQDAATGQFELVEQVGGMLAYYLLNGQNITAFPSGFQMISGDNMRRNYTVGDPSKPDPGKSQWQALGQTTQDALSQRAVGFNCLNYAGTPEATLFRHFLPDKSYLDANCMNGIRLELMFPSCWKGGNALDSPNHKDHVAFPDLVIDGTCPPGFPVRLPSLLFEVIWNTYAFKNRNGKFVFSNTDTTGFGYHGDFLTGWDPGFLQKAIDTCTNPSGRIEDCKVFNVVDQGTATSCKMKAPLPQSLADENVKGPMNKLPGGMTGKSPGPVANIGQQKDANAASPAAATPAPAGQTPAAGQAPAGQAPGQAPGQAPAGQAPGQAPAGQAPADPA…	559	557 - AHRRRRRDGHLHAHKHGKRFRR - 578	0.47	nucl 15.5, cyto_nucl 14.5, cyto 10.5, cysk 3	nucl	Cluster04724	-	-	PF09362|Domain of unknown function (DUF1996)|2.2E-74;	PTHR32208:SF33||8.4E-110;PTHR32208:SF33||8.4E-110;PTHR32208||8.4E-110;PTHR32208||8.4E-110;	-	-	-	-	-	-	-	-	-	-	-
g978.t1	Dreco_g978	MTVSKLKAGLLAAVGLTAAAMAQKFPKEDLVLCDCGIGDNKEHEDWSTSRQMNWYQDITWPRSGYTYPEAPDMVVQVPYKDGKYPWEPTGVTATMPNGHVWTAYIEGGTPDGFKAGYAVSPKEGGQLLHCWAYRGRPVSGAINKTVNHDAVCWSAFVCSRSNKPPPRPKDMGSRTSLTTSPAAPSTSVFSEPPATLYPTTVSGHAAPTPVPRVGSLSVSTTVNPRFINWQDTWQAFINHFVWDKNTGGCVGGPAQGNGFSISFDCFGVQIDEDTHMTLLLIKALRDVGVNSLWFNQNPIVPGNGTSTQHQSWVVMPESFTIQAKDSSNNNVVGRLSYKTRYDGFLAGTCSVCETGRFNRQYFDPIIAAVQGSYPVYNNFTIEARCDPWMVCL	0.374	23	0.52	23	0.84	6	0.723	0.63	Y	0.45	SignalP-noTM		extr 24, mito 3	KFPKEDLVLCDCGIGDNKEHEDWSTSRQMNWYQDITWPRSGYTYPEAPDMVVQVPYKDGKYPWEPTGVTATMPNGHVWTAYIEGGTPDGFKAGYAVSPKEGGQLLHCWAYRGRPVSGAINKTVNHDAVCWSAFVCSRSNKPPPRPKDMGSRTSLTTSPAAPSTSVFSEPPATLYPTTVSGHAAPTPVPRVGSLSVSTTVNPRFINWQDTWQAFINHFVWDKNTGGCVGGPAQGNGFSISFDCFGVQIDEDTHMTLLLIKALRDVGVNSLWFNQNPIVPGNGTSTQHQSWVVMPESFTIQAKDSSNNNVVGRLSYKTRYDGFLAGTCSVCETGRFNRQYFDPIIAAVQGSYPVYNNFTIEARCDPWMVCL	369	none	0.05	nucl 9.5, cyto_nucl 9.5, extr 9, cyto 6.5, cysk 6	nucl	Cluster06012	-	-	-	-	-	-	-	-	-	-	-	-	-	-	-
g996.t1	Dreco_g996	MLRRPPIEGRGSTQQQKLLLAFAFLLLPWLPLADAQQQQKQHPQAVPLPVPQAGDSSSQQQQAKNEAAIRNYAAAHFGNPKPEEAPEYAATTGPVHDDDEASAASRRHHERVGQPPRQKPAERSSPRDVNHKNKPAHKRPTIVPDDASAIATLAPAQSVRAPNSPRHLRPSSALSAGVATPQNARSLEDWEVEDFVLLATVDGDLYATDRKTGKERWHLEVDQPMVETVHHRVNNSVLDDDYNPVDHYIWAVEPNHDGGLYVWVPSPDARPRSTGFTMKRLVEELAPFADEEPPVVYTGDKKTTMVTLDAATGRVLKWFGSTGSQVNEAESCQRPNDFYGKDARECSSTGTITLGRTEYTVGIQRRDGRPIATLKYAEWGPNNYDFDLLQQYHTTLDSR…	0.866	36	0.875	36	0.941	33	0.748	0.806	Y	0.45	SignalP-noTM		extr 11, mito 4, cyto 4, plas 4, cyto_mito 4	QQQKQHPQAVPLPVPQAGDSSSQQQQAKNEAAIRNYAAAHFGNPKPEEAPEYAATTGPVHDDDEASAASRRHHERVGQPPRQKPAERSSPRDVNHKNKPAHKRPTIVPDDASAIATLAPAQSVRAPNSPRHLRPSSALSAGVATPQNARSLEDWEVEDFVLLATVDGDLYATDRKTGKERWHLEVDQPMVETVHHRVNNSVLDDDYNPVDHYIWAVEPNHDGGLYVWVPSPDARPRSTGFTMKRLVEELAPFADEEPPVVYTGDKKTTMVTLDAATGRVLKWFGSTGSQVNEAESCQRPNDFYGKDARECSSTGTITLGRTEYTVGIQRRDGRPIATLKYAEWGPNNYDFDLLQQYHTTLDSRYIASRHDGKIYAFDIARADEPAPLFSLKFATPVARV…	1211	114 - QPPRQKPAERSSPRDVNHKNKPAHK - 138	0.71	cyto_nucl 10.8333, nucl 10.5, cyto 8, pero 6, cyto_mito 5.5, plas 4	cyto_nucl	Cluster02430	O94537|PPK4_SCHPO|1e-112	1225|PHI:1225|FGSG_12132|I1RP25|5518|Gibberellazeae(related:Fusariumgraminearum)|Lethal|0.0	PF00069|Protein kinase domain|4.0E-39;PF06479|Ribonuclease 2-5A|3.9E-44;	PTHR13954||0.0;PTHR13954||0.0;PTHR13954:SF6||0.0;PTHR13954||0.0;PTHR13954:SF6||0.0;PTHR13954:SF6||0.0;	SSF56112||3.24E-54;SSF56112||3.24E-54;SSF50998||1.7E-11;SSF50998||1.7E-11;	-	-	PS00108|Serine/Threonine protein kinases active-site signature.|-;PS00107|Protein kinases ATP-binding region signature.|-;	PS51392|KEN domain profile.|35.147;PS50011|Protein kinase domain profile.|39.778;	SM00580|domain in protein kinases, N-glycanases and other nuclear proteins|9.7E-10;SM00564|beta-propeller repeat|3.6;SM00564|beta-propeller repeat|61.0;SM00220|Serine/Threonine protein kinases, catalytic domain|6.1E-45;	Coil||-;Coil||-;	G3DSA:1.10.510.10||1.4E-40;G3DSA:2.140.10.10||4.6E-8;G3DSA:2.140.10.10||4.6E-8;G3DSA:3.30.200.20||2.6E-18;	-	-	-
g1017.t1	Dreco_g1017	MMFSVSTLLMASAACAVAQQQQAPPPPPAGVDGPQDGPFGGPHHGRGPHHGPPTWLMEKVLVCPAAGGLATVDLPCPPAKPKHNENDKPKHPHVRPAGAPEWDGTITIFPSGAPEVTVTASIDCKGCASVTVSKPASCTNMPPRRPHHERPGFGNPGLPVVTAPAGATKTVYFKGPPVCKPTPA	0.397	19	0.6	19	0.953	10	0.905	0.765	Y	0.45	SignalP-noTM		extr 18, E.R. 3, cyto 2, vacu 2	QQQAPPPPPAGVDGPQDGPFGGPHHGRGPHHGPPTWLMEKVLVCPAAGGLATVDLPCPPAKPKHNENDKPKHPHVRPAGAPEWDGTITIFPSGAPEVTVTASIDCKGCASVTVSKPASCTNMPPRRPHHERPGFGNPGLPVVTAPAGATKTVYFKGPPVCKPTPA	165	none	0.04	extr 19, cyto 11, cyto_nucl 7	extr		-	-	-	-	-	-	-	-	-	-	-	-	-	-	-
g1062.t1	Dreco_g1062	MIPASSRLVISSALLLAVAAVSADDGDNVRVWAAVAYVNHGESTPLLGGLQTVLTPEGAQQMQRQGIAFRSRYLNNGTQIQGINVVTIDNLQLNISSQTDDWVAASALAFMQGLYPPDVMALLAAGGGTDLGLNLVAGSNTTDYPLLGYQYPRVRTLSNETSASLGIQGELYCSEWQDEMKNNLNKNRNVQSQINDNRPFYENLFSSDPLKGFVTPAQATYLNAYELYDLVNYQYRHNGTVFKELQDANKTIDTLQVNAYNLEQDKAIHDANKKDDPLNALYSIAGRTLAYEVEDKLNGIVARKGGGVKISLMFGSFRPLLSFLTIAGLLTTENLASGPFSRLPEPGATMIFELVSDMSSSNSDVFPPTDKLKVRFYYRSTANANDVFTSFALFGAGSD…	0.742	24	0.817	24	0.958	19	0.9	0.862	Y	0.45	SignalP-noTM		extr 21, plas 3, E.R. 2	DGDNVRVWAAVAYVNHGESTPLLGGLQTVLTPEGAQQMQRQGIAFRSRYLNNGTQIQGINVVTIDNLQLNISSQTDDWVAASALAFMQGLYPPDVMALLAAGGGTDLGLNLVAGSNTTDYPLLGYQYPRVRTLSNETSASLGIQGELYCSEWQDEMKNNLNKNRNVQSQINDNRPFYENLFSSDPLKGFVTPAQATYLNAYELYDLVNYQYRHNGTVFKELQDANKTIDTLQVNAYNLEQDKAIHDANKKDDPLNALYSIAGRTLAYEVEDKLNGIVARKGGGVKISLMFGSFRPLLSFLTIAGLLTTENLASGPFSRLPEPGATMIFELVSDMSSSNSDVFPPTDKLKVRFYYRSTANANDVFTSFALFGAGSDQTSVPYSSFVKSMEDRSTSPTSWC…	563	none	0.18	nucl 7, E.R. 7, cyto 5, pero 4.5, extr 4, mito_pero 4, mito 2.5, extr_plas 2.5, cyto_golg 2.5	nucl	Cluster03824	-	-	PF00328|Histidine phosphatase superfamily (branch 2)|7.2E-9;	PTHR11567||5.9E-59;PTHR11567:SF127||5.9E-59;PTHR11567:SF127||5.9E-59;PTHR11567||5.9E-59;	SSF53254||2.86E-34;SSF53254||2.86E-34;	-	-	-	-	-	Coil||-;	G3DSA:3.40.50.1240||4.8E-27;	-	-	-
g1063.t1	Dreco_g1063	MKFASGILLATIASAAVISTPDAATDAILTTFEDALRQLPSTITRLGRQVEVFEDSQTENLVDGFDTAAEVVKNCSEKLRGSDKFSETEAMVILELAETLGIATSPFLMALFKQRSALANATLANAALAKVTLANADLADANGCSVVGELLLPRLLQQLRDLARDIAPKVPSSNRAGIIRQFGKTLNSFPKPKPKPKPKPKPKPKPKPKPKPKPQLQPRRQNSQTR	0.211	16	0.425	16	0.895	7	0.857	0.658	Y	0.45	SignalP-noTM		extr 20, mito 3, pero 2	VISTPDAATDAILTTFEDALRQLPSTITRLGRQVEVFEDSQTENLVDGFDTAAEVVKNCSEKLRGSDKFSETEAMVILELAETLGIATSPFLMALFKQRSALANATLANAALAKVTLANADLADANGCSVVGELLLPRLLQQLRDLARDIAPKVPSSNRAGIIRQFGKTLNSFPKPKPKPKPKPKPKPKPKPKPKPKPQLQPRRQNSQTR	210	190 - PKPKPKPKPKPKPKPKPKPKPKPKPQLQPRR - 220	0.39	cyto 23.5, cyto_nucl 17.5, nucl 6.5	cyto		-	-	-	-	-	-	-	-	-	-	-	-	-	-	-
g1105.t1	Dreco_g1105	MVHSLALVGGLAALLTGVLACGDSDSCYGPTNAVEHVRQVKRMQPGVPHAAYGPKGPLEWGQVNFLHTTDTHGWLEGHLKEKNYGADWGDFVTFTRRMKRTAAKRGVDLLLIDTGDLHDGNGLSDATPIDGTMSMPIFDELEYDLLTIGNHELYVSEVSYQMFNEYARRWGDRYITSNVKVLNKTSGQHEYVGKTHRYFTTRHGLRVMAFGVLFDFVRNSNASIILKAQDMIKEPWFLDALTTKDPIDMFILFGHNPAHPSNPVSTFKLVFDEIRKVHPKTPIQIFGGHSHVRDFAVYDESSVAIASGRYCETLGWVSMTGFDESNSAFDGSEKPRCSLHPSRPALDNSTSPFLYSRRYLDWNRKTFIYHSNSHELHYDRRAGKKVTDKISKTRHVLKL…	0.703	21	0.817	21	0.984	12	0.949	0.888	Y	0.45	SignalP-noTM		extr 8, plas 7, pero 4, E.R. 3, cyto_pero 3	GDSDSCYGPTNAVEHVRQVKRMQPGVPHAAYGPKGPLEWGQVNFLHTTDTHGWLEGHLKEKNYGADWGDFVTFTRRMKRTAAKRGVDLLLIDTGDLHDGNGLSDATPIDGTMSMPIFDELEYDLLTIGNHELYVSEVSYQMFNEYARRWGDRYITSNVKVLNKTSGQHEYVGKTHRYFTTRHGLRVMAFGVLFDFVRNSNASIILKAQDMIKEPWFLDALTTKDPIDMFILFGHNPAHPSNPVSTFKLVFDEIRKVHPKTPIQIFGGHSHVRDFAVYDESSVAIASGRYCETLGWVSMTGFDESNSAFDGSEKPRCSLHPSRPALDNSTSPFLYSRRYLDWNRKTFIYHSNSHELHYDRRAGKKVTDKISKTRHVLKLGDVAGCAPQDWCMSCAPMEDL…	627	none	0.17	cyto_nucl 11.3333, cyto 11, nucl 10.5, cyto_golg 7.33333, extr 4, golg 2.5	cyto_nucl	Cluster03919	D4B093|A1864_ARTBC|0	-	-	PTHR11575||2.9E-146;PTHR11575:SF22||2.9E-146;PTHR11575||2.9E-146;PTHR11575:SF22||2.9E-146;	SSF55816||5.89E-42;SSF56300||6.38E-64;SSF56300||6.38E-64;	-	-	-	-	-	-	G3DSA:3.60.21.10||1.8E-98;G3DSA:3.90.780.10||2.7E-41;G3DSA:3.90.780.10||2.7E-41;	-	PIRSF017316||4.8E-169;	-
g1115.t1	Dreco_g1115	MKLAVPLALFALHGAANALYLQRRQPSDGPPRVLRLDLHRNAILDPVGHDRLRRRTATVNVDLDNYQTLYFFNASVGTPAQELRMHLDTGSSDLWVNTPKSDLCSMRSRPCAFSGEFSPNKSTTYEYINSKFNISYADGSSAAGDYVTDTLRFGGANVSAFQFGIGYESTSPQNVIGIGYPANEVQVVRYGMSPYDNLPARLAADGIIASNTFSLWLNDLDADTGSILFGGVDASRYHGDLVTVPIQKVQGAYVAFFITMTGLNVGTKTLDDDMALAVLLDSGSSFTYLPNSLTKQIYNAVDAVYQNEQRVAFVPCSLANENVTMTFKFSSPAAVAVPMNELVLPIPQSGSGDPLTFDNGEPACFFGILPADSGTSVLGDTFLRSAYAVFDLDNNSISL…	0.586	19	0.662	19	0.82	1	0.732	0.7	Y	0.45	SignalP-noTM		extr 25	YLQRRQPSDGPPRVLRLDLHRNAILDPVGHDRLRRRTATVNVDLDNYQTLYFFNASVGTPAQELRMHLDTGSSDLWVNTPKSDLCSMRSRPCAFSGEFSPNKSTTYEYINSKFNISYADGSSAAGDYVTDTLRFGGANVSAFQFGIGYESTSPQNVIGIGYPANEVQVVRYGMSPYDNLPARLAADGIIASNTFSLWLNDLDADTGSILFGGVDASRYHGDLVTVPIQKVQGAYVAFFITMTGLNVGTKTLDDDMALAVLLDSGSSFTYLPNSLTKQIYNAVDAVYQNEQRVAFVPCSLANENVTMTFKFSSPAAVAVPMNELVLPIPQSGSGDPLTFDNGEPACFFGILPADSGTSVLGDTFLRSAYAVFDLDNNSISLAQTKFNATESDVVEITKGA…	461	none	0.15	mito 10, nucl 8, plas 4, cyto 4, cyto_plas 4	mito	Cluster01248	Q8NKB6|OPSB_ASPOR|1e-132	68|PHI:68|SAP1|AAA34368|5476|Candidaalbicans|Reducedvirulence|9e-57	PF00026|Eukaryotic aspartyl protease|8.9E-70;	PTHR13683:SF275||7.3E-107;PTHR13683||7.3E-107;	SSF50630||2.01E-88;	-	-	PS00141|Eukaryotic and viral aspartyl proteases active site.|-;	-	-	-	G3DSA:2.40.70.10||4.3E-47;G3DSA:2.40.70.10||2.1E-39;	-	-	PR00792|Pepsin (A1) aspartic protease family signature|3.4E-20;PR00792|Pepsin (A1) aspartic protease family signature|3.4E-20;PR00792|Pepsin (A1) aspartic protease family signature|3.4E-20;PR00792|Pepsin (A1) aspartic protease family signature|3.4E-20;
g1134.t1	Dreco_g1134	MKSTPVSVAVLWGFAALAMTEALPPNSIPMRCATICGPMVELTALCSTPKLLKRGDQRRWRSREGWLRKRDFVTLVPAPTSFPYSLTADLTRPTSKVAAPPRQQPVPSPSRATPGIAMGAWGSPERTTPTTSAIASSRSSSSGGSSSSSSSNRPLAAATPATTGSLLGGPAQATPTSSIPVVGGASNGLSAEERCVCMNRSFDVPRVAALCASCIKQTGDEMNIMPSYILHPPLPSLPLGHLSVLTQVKDMDLIMKVCTFSSTTYSPDKDGVVNNVVVEAARPVVEAAVVVSRASRTSGVGGAVVGVVSLCSALWSASEG	0.744	23	0.759	23	0.899	15	0.775	0.768	Y	0.45	SignalP-noTM		extr 14, mito 6, plas 5	PPNSIPMRCATICGPMVELTALCSTPKLLKRGDQRRWRSREGWLRKRDFVTLVPAPTSFPYSLTADLTRPTSKVAAPPRQQPVPSPSRATPGIAMGAWGSPERTTPTTSAIASSRSSSSGGSSSSSSSNRPLAAATPATTGSLLGGPAQATPTSSIPVVGGASNGLSAEERCVCMNRSFDVPRVAALCASCIKQTGDEMNIMPSYILHPPLPSLPLGHLSVLTQVKDMDLIMKVCTFSSTTYSPDKDGVVNNVVVEAARPVVEAAVVVSRASRTSGVGGAVVGVVSLCSALWSASEG	297	none	0.34	mito 16, cyto 5, pero 4, extr_plas 3, plas 2, extr 2, nucl 2	mito		-	-	-	-	-	-	-	-	-	-	-	-	-	-	-
g1140.t1	Dreco_g1140	MLSLRLSLLFSAAVLGTLGSGRKVPSNVQSFYHGIRARQRCNEVLAGGFHASHGDTRGSGTFDYCGDHMDDYGVLYLQGRDGALADMDIDCDGVQNGPADDHRCRSSADIQAITAFAETVRRYGTGQPDLDPNAHAYVVLGNDGTKPGWKTFDPRNHGIEPLSVVAVVCKDKLFFAVWGDTNGDDGPQAVVGEASIALATACFGQAMNGNAGHGDADVLYIAFRGHEAVPGADGAKWNAQNFDEFESSIADLGDRLVTRIGDGGANQSTCEPSPTPAGRCSWEGHCAGAFCNSEHDCSDDLICETGKCSAPVY	0.237	20	0.462	20	0.957	1	0.891	0.693	Y	0.45	SignalP-noTM		extr 26	GRKVPSNVQSFYHGIRARQRCNEVLAGGFHASHGDTRGSGTFDYCGDHMDDYGVLYLQGRDGALADMDIDCDGVQNGPADDHRCRSSADIQAITAFAETVRRYGTGQPDLDPNAHAYVVLGNDGTKPGWKTFDPRNHGIEPLSVVAVVCKDKLFFAVWGDTNGDDGPQAVVGEASIALATACFGQAMNGNAGHGDADVLYIAFRGHEAVPGADGAKWNAQNFDEFESSIADLGDRLVTRIGDGGANQSTCEPSPTPAGRCSWEGHCAGAFCNSEHDCSDDLICETGKCSAPVY	293	none	0.03	mito 12.5, cyto_mito 9.66667, extr 9, cyto_nucl 6, cyto 5, cyto_pero 4.33333	mito	Cluster02307	Q4WB37|CSN_ASPFU|4e-57	2403|PHI:2403|CSN1|A9QUB2|169388|Fusariumsolani|Mixedoutcome|2e-124	PF07335|Fungal chitosanase of glycosyl hydrolase group 75|7.6E-63;	PTHR42061:SF2||5.3E-60;PTHR42061||5.3E-60;	-	-	-	-	-	-	-	-	-	-	-
g1152.t1	Dreco_g1152	MRSLLFSLATLIGLVSLAVDGRITGIAIPSTIRPGDAFNVTVYSENFIQSVFDVALTFGYAAGNGYPGSLGTVITSVCLGKDQSNQPRDFTKLITMPTDAPRGRAVVKASLTSLIGVVSSPQQIMFNVSVTLGDRTSKTYVSSRW	0.315	38	0.443	22	0.959	12	0.875	0.676	Y	0.45	SignalP-noTM		extr 24, E.R. 2	NVTVYSENFIQSVFDVALTFGYAAGNGYPGSLGTVITSVCLGKDQSNQPRDFTKLITMPTDAPRGRAVVKASLTSLIGVVSSPQQIMFNVSVTLGDRTSKTYVSSRW	107	none	0.03	nucl 9.5, cyto_nucl 9.5, cyto 8.5, extr 8, mito 4, extr_plas 4	nucl	Cluster00725	-	-	-	-	-	-	-	-	-	-	-	-	-	-	-
g1178.t1	Dreco_g1178	MMLLIPFFILITIALAAFPSGDASVLTPAVVPMEWQVQAFVDGPTLTLNGTVQDVERQLIAINPNYKTADFHNRTAAGRDVERRLDFSGADIICSKKLFGSVKSKGFNDAYARFNNMQGRPNLPPGPKVCSRISCSWDTALWLCNDMPGRMLLDTWNTVFKALNEIWRRCSNNSNKGVGGQIFHRTNWNMIMTSDRC	0.739	17	0.848	17	0.989	11	0.976	0.917	Y	0.45	SignalP-noTM		extr 16, plas 7, E.R. 2	FPSGDASVLTPAVVPMEWQVQAFVDGPTLTLNGTVQDVERQLIAINPNYKTADFHNRTAAGRDVERRLDFSGADIICSKKLFGSVKSKGFNDAYARFNNMQGRPNLPPGPKVCSRISCSWDTALWLCNDMPGRMLLDTWNTVFKALNEIWRRCSNNSNKGVGGQIFHRTNWNMIMTSDRC	180	none	0.06	extr 21, cyto 7, nucl 3	extr	Cluster08028	-	-	-	PTHR35605:SF1||5.4E-18;PTHR35605||5.4E-18;	-	-	-	-	-	-	-	-	-	-	-
g1180.t1	Dreco_g1180	MRAFGLPATLAALLAANLADAQSQYLVTDMSFGHAGTLSSADAHGKIKHFALSGKPIQPELLSNKVILTPVAPGNQRGAVWAENPLTRSTWSVDVDFRVSGPERGGGSLNIWLARQGGVEVGTHSIHSVGKFDGFALVIDSSARHGGMVRGFLNDGSIDYSRLATVDAMPFGQCKYAYRNLGRPSQVKIIQSPKSFRVEIDSKLCFETNKVSVPAGNFFGITGASADNPDSIEVFKLVVLSESTVSGDGDAKPIPVKYATQQQQPPAVTPNKPNMAKAAAKVPADQPAEKFTSSKEQFEDLHNRLQSAMHQIADVHDSVLQKQQEEEQHHLDVKQAIDALRTQILRLQQSDLLLNRIKDLESEVHGLRTDLGSKFNAHDESFQGYLSHHHATLRNVVAN…	0.466	24	0.589	22	0.896	4	0.771	0.687	Y	0.45	SignalP-noTM		extr 21, cyto 5	YLVTDMSFGHAGTLSSADAHGKIKHFALSGKPIQPELLSNKVILTPVAPGNQRGAVWAENPLTRSTWSVDVDFRVSGPERGGGSLNIWLARQGGVEVGTHSIHSVGKFDGFALVIDSSARHGGMVRGFLNDGSIDYSRLATVDAMPFGQCKYAYRNLGRPSQVKIIQSPKSFRVEIDSKLCFETNKVSVPAGNFFGITGASADNPDSIEVFKLVVLSESTVSGDGDAKPIPVKYATQQQQPPAVTPNKPNMAKAAAKVPADQPAEKFTSSKEQFEDLHNRLQSAMHQIADVHDSVLQKQQEEEQHHLDVKQAIDALRTQILRLQQSDLLLNRIKDLESEVHGLRTDLGSKFNAHDESFQGYLSHHHATLRNVVANSVPGHGKVIFFLIGSQMAVVGAYI…	414	none	0.29	cyto 15, pero 4, mito 3.5, plas 3, nucl 3, E.R._mito 3, E.R. 1.5, cysk_plas 1.5	cyto	Cluster03966	P43555|EMP47_YEAST|6e-15	-	PF03388|Legume-like lectin family|1.3E-25;	PTHR12223||8.4E-76;PTHR12223:SF26||8.4E-76;	SSF49899||3.62E-47;	-	-	-	PS51328|L-type lectin-like (leguminous) domain profile.|30.548;	-	Coil||-;	G3DSA:2.60.120.200||4.0E-43;	-	-	-
g1191.t1	Dreco_g1191	MAMTLSRLKCTSAGRVTAGLLLSFLAVASAGHEDMLAKQEVLLPPIPGPPQPAEHVFTLRHIYHHGTDRHPRLHRKRDVHHDERSSRVYLAAEDDYPEHDLLHLEARSRPETIERLVDRRPSVVDPLVARSRDDGYAVAMDASAWTMDEVPTPDITDKDTVLSLAYMAANAYVEDERGADWEDVGEPFNRSVDFGWQMDGLRGHIWADKTNSTIVIGLKGTSPAVFDGDGTTTNDKINDNLFFSCCCGQQGQWTWHQVCDCATGTYSCNNTCVAQELRQENRYYAAARELYSNITELYPDSVIWLSGHSLGGAVSSLLGLTYGIPVVTFEAVPEALPASRLGLPVPPGADPKAPQGRRHTGSFHFGHTADPIYIGTCNGPAASCSFAGYALETACHTGR…	0.365	31	0.513	31	0.841	26	0.683	0.605	Y	0.45	SignalP-noTM		extr 17, mito 10	HEDMLAKQEVLLPPIPGPPQPAEHVFTLRHIYHHGTDRHPRLHRKRDVHHDERSSRVYLAAEDDYPEHDLLHLEARSRPETIERLVDRRPSVVDPLVARSRDDGYAVAMDASAWTMDEVPTPDITDKDTVLSLAYMAANAYVEDERGADWEDVGEPFNRSVDFGWQMDGLRGHIWADKTNSTIVIGLKGTSPAVFDGDGTTTNDKINDNLFFSCCCGQQGQWTWHQVCDCATGTYSCNNTCVAQELRQENRYYAAARELYSNITELYPDSVIWLSGHSLGGAVSSLLGLTYGIPVVTFEAVPEALPASRLGLPVPPGADPKAPQGRRHTGSFHFGHTADPIYIGTCNGPAASCSFAGYALETACHTGRECVWDVVADKGWRVGIGTHKIRAVIHDVILK…	571	none	0.22	nucl 15.5, cyto_nucl 15, cyto 9.5, mito 3	nucl	Cluster00455	Q2H6M8|ATG15_CHAGB|0	1166|PHI:1166|ATG15|I1RFN8|5518|Gibberellazeae(related:Fusariumgraminearum)|Reducedvirulence|0.0	PF01764|Lipase (class 3)|1.1E-5;	PTHR21493||5.6E-102;PTHR21493:SF140||5.6E-102;	SSF53474||3.45E-30;	-	-	-	-	-	-	G3DSA:3.40.50.1820||2.2E-29;	-	-	-
g1195.t1	Dreco_g1195	MVLLPLVALLAPSSILLFPHLAEAQFYQDYMPDTTLPDSYLYQHVPQVAPMRVINVHPHTVYLSYNCHYMRDICKNAELFQASARGLNLHPASGIDNNVYGYDLDTGDAPTGEPRSCQEYRRDASCPPGWKDTHTCPEVDQRKPMKSNGEWFTTSLEPGTTVNNLQHLRDGNNNIIRNSSIRYSCDEFPPATWVEGGNGWDRNTPSNTRCAAIACEGATGVKAEQNWQGLAHGRLRIELQNLARTHPGYNPARSIIFFRFLFNNDGADDVAARVIVMKDIGTSDELISDNVIPQQKRSVAAVNSTLTSLTGPGLTAEELKAHLRAGRGYETLIHENLTVSEPDLARRDRIMSDVLSRRGMPGMDQLDGFVLSDNATLPRSVSEAPKLKGRGVGPRKRAP…	0.809	25	0.802	25	0.96	8	0.805	0.804	Y	0.45	SignalP-noTM		extr 23, plas 4	FYQDYMPDTTLPDSYLYQHVPQVAPMRVINVHPHTVYLSYNCHYMRDICKNAELFQASARGLNLHPASGIDNNVYGYDLDTGDAPTGEPRSCQEYRRDASCPPGWKDTHTCPEVDQRKPMKSNGEWFTTSLEPGTTVNNLQHLRDGNNNIIRNSSIRYSCDEFPPATWVEGGNGWDRNTPSNTRCAAIACEGATGVKAEQNWQGLAHGRLRIELQNLARTHPGYNPARSIIFFRFLFNNDGADDVAARVIVMKDIGTSDELISDNVIPQQKRSVAAVNSTLTSLTGPGLTAEELKAHLRAGRGYETLIHENLTVSEPDLARRDRIMSDVLSRRGMPGMDQLDGFVLSDNATLPRSVSEAPKLKGRGVGPRKRAPLMRNTTSWQLEEARRIVDQARAESN…	1614	386 - KLKGRGVGPRKR - 397	0.4	nucl 30	nucl	Cluster00250	P49426|EXG1_COCCA|1e-115	-	PF12708|Pectate lyase superfamily protein|2.5E-13;PF12708|Pectate lyase superfamily protein|2.9E-67;	PTHR31375||1.2E-71;PTHR31375:SF15||1.2E-71;PTHR31375:SF15||1.2E-71;PTHR31375||1.2E-71;	SSF51126||2.23E-33;SSF51126||8.17E-34;SSF51126||8.17E-34;SSF51126||8.17E-34;	-	-	-	-	-	Coil||-;	G3DSA:2.160.20.10||4.6E-13;G3DSA:2.160.20.10||2.3E-29;G3DSA:2.160.20.10||2.1E-13;	-	-	-
g1196.t1	Dreco_g1196	MKLPQRASWTRHFVSLAVVLCLAGVVQASNDCAPSVWQPGQFTDMKFKRQAAATTSSLNTGTGTVSPSSVAVTSIPVPVSMSPLLSGGNVTTGKINCRYTTNTKGMDINYYTCTALANRYHISVEKFFQLNPTVHANCGNIQADTDYCVAGFIEPLRATKGLCGPPNGNATCRGTEFQCCNAKTFTCGNSLEDCADGTCYEGACAGDSVFTTNGECGRQHGYKQCAGVWGDCCNAEGKCGTGEAFCAYGKCQLGNCTLMAQPQKVPVGGATPDGTCGGTKQYKCNAAYGKCCNKDGRCGRRSEDCGTGCQPLFGDCTIRHTSFSSTTTTTTTTKVSTPSSTLISSKTPTTKTPTLSALPSCGQTCFNNMLGQYSQLGCASPDADCLCGKVDFLNGIRDC…	0.896	29	0.918	29	0.976	19	0.93	0.925	Y	0.45	SignalP-noTM		extr 27	NDCAPSVWQPGQFTDMKFKRQAAATTSSLNTGTGTVSPSSVAVTSIPVPVSMSPLLSGGNVTTGKINCRYTTNTKGMDINYYTCTALANRYHISVEKFFQLNPTVHANCGNIQADTDYCVAGFIEPLRATKGLCGPPNGNATCRGTEFQCCNAKTFTCGNSLEDCADGTCYEGACAGDSVFTTNGECGRQHGYKQCAGVWGDCCNAEGKCGTGEAFCAYGKCQLGNCTLMAQPQKVPVGGATPDGTCGGTKQYKCNAAYGKCCNKDGRCGRRSEDCGTGCQPLFGDCTIRHTSFSSTTTTTTTTKVSTPSSTLISSKTPTTKTPTLSALPSCGQTCFNNMLGQYSQLGCASPDADCLCGKVDFLNGIRDCSNGACGTDIGSAVIAFGKAYCSSAPATHT…	479	none	0.24	cyto_nucl 13, nucl 12, cyto 12, extr 5	cyto_nucl		Q4WLB9|CFMA_ASPFU|5e-09	-	PF05730|CFEM domain|1.6E-13;PF05730|CFEM domain|1.6E-13;	PTHR37928||4.4E-19;	-	-	PD000609|CHITIN-BINDING CHITINASE PRECURSOR SIGNAL GLYCOSIDASE HYDROLASE LECTIN DEGRADATION DIRECT SEQUENCING|2.0E-4;	-	PS50941|Chitin-binding type-1 domain profile.|7.445;PS50941|Chitin-binding type-1 domain profile.|7.912;	SM00747||1.4E-13;SM00747||2.5E-11;	-	G3DSA:3.30.60.10||4.3E-7;G3DSA:3.30.60.10||7.4E-7;	-	-	-
g1200.t1	Dreco_g1200	MLPVPLALAVVLLGAPATSAEAKHQWSDPTDYCYDFFESCLGTDVQCAFFFDKTPENYTSQDACFDDRLERDRNRPLLQWHLPADDKVWHQQRCRLKNDWCIGTDATCGKIVNDARRAGCFNARSKGPWLQPNSTQCGKGWETEECDGTVKWCKKKAKLYGSESACLEKRLAFHNVYSPSCDGSVSEPCMGTKAWCERPEEIEANGSREKCVMRRGPPPLGLTKWLARDETCPARAREEKCVGTELACMSYVQPSLSQDCLATREWAPWYLVDGTAAGQVHDASATEKDVGTVVWCEQKWQRLKYANSAACFAARGPRPGNQTADLFSLVKAGIKKNVRDTAASLALTVAIQMVMKENATANATIKAIEDGLPLFLNASRPVVMGTIDEVVQGLESSSK…	0.731	23	0.781	23	0.932	12	0.834	0.809	Y	0.45	SignalP-noTM		extr 17, mito 3, cyto 3, cyto_mito 3	HQWSDPTDYCYDFFESCLGTDVQCAFFFDKTPENYTSQDACFDDRLERDRNRPLLQWHLPADDKVWHQQRCRLKNDWCIGTDATCGKIVNDARRAGCFNARSKGPWLQPNSTQCGKGWETEECDGTVKWCKKKAKLYGSESACLEKRLAFHNVYSPSCDGSVSEPCMGTKAWCERPEEIEANGSREKCVMRRGPPPLGLTKWLARDETCPARAREEKCVGTELACMSYVQPSLSQDCLATREWAPWYLVDGTAAGQVHDASATEKDVGTVVWCEQKWQRLKYANSAACFAARGPRPGNQTADLFSLVKAGIKKNVRDTAASLALTVAIQMVMKENATANATIKAIEDGLPLFLNASRPVVMGTIDEVVQGLESSSKALAST	381	none	0.24	cyto 11, extr 9, nucl 6, mito 5	cyto		-	-	-	-	-	-	-	-	-	-	-	-	-	-	-
g1211.t1	Dreco_g1211	MRLSSLALLLSSVLVLQHAGASVIGHQGDPASPTVGKRSSQNRHAAARRFCNAKHKIKLNSRRSTESPLQPLEAYEIFCWLQDADEKAACFFVTVAHLLSTTPQALADRIGIPLPRRGEVGISKDTMFYALELLGVRFRIVALQGTLEQQRPGPMQNIRCTGRGLRWRHSHPPPAVMGVGFFNRNRDGGHVVIVRNAGNPLRIRYLDFQDDPRGTDMTVEAENSCHAFYFYLDLEASSGDLMDELRPSIDAMMATPSLVPALPTSLFPPALPLPSDTADRFLEEDAVEFINSLNDFWEPWSDDDSTRSGQSSDGDSDTSMEGPPTRERTSTLARLRYHQQQQQGTTTEGHSEGAATQLQAPTRHDPDAPGPSRIDAADPETQLQAPSPHVAGHPGPSRI…	0.517	22	0.693	22	0.972	12	0.928	0.82	Y	0.45	SignalP-noTM		extr 17, nucl 4, cyto 3, plas 2, cyto_mito 2	VIGHQGDPASPTVGKRSSQNRHAAARRFCNAKHKIKLNSRRSTESPLQPLEAYEIFCWLQDADEKAACFFVTVAHLLSTTPQALADRIGIPLPRRGEVGISKDTMFYALELLGVRFRIVALQGTLEQQRPGPMQNIRCTGRGLRWRHSHPPPAVMGVGFFNRNRDGGHVVIVRNAGNPLRIRYLDFQDDPRGTDMTVEAENSCHAFYFYLDLEASSGDLMDELRPSIDAMMATPSLVPALPTSLFPPALPLPSDTADRFLEEDAVEFINSLNDFWEPWSDDDSTRSGQSSDGDSDTSMEGPPTRERTSTLARLRYHQQQQQGTTTEGHSEGAATQLQAPTRHDPDAPGPSRIDAADPETQLQAPSPHVAGHPGPSRIDPAEVDVAVDGIFHLSVEEECA…	764	none	0.66	nucl 24.5, cyto_nucl 14, mito 5	nucl	Cluster00138	-	-	-	-	-	-	-	-	-	-	-	-	-	-	-
g1239.t1	Dreco_g1239	MRSNILALAAAPLILLAQANGRDMGPTNKAPANVDPSFNGNTIDVDPSVAQNGPGGVPPPTAVDEVDAIDGNQINSVPAPGGPGVAPPAGGPVDDTNGQHIQHAGPPGGPVPVPPPAGGQVDATHGQQNPPAGPPAGPPAGPPAGPDVDISGLPNACKASCGAIAETIQGCMNSIQANSRQGAPSQVDESQLEDLTHKAMQCICSNPAADLTKSFTPCVECLRTNTPGAEAESIDQVIQTFQAQCQAHSGSTQAPRPGESQVVPPPPASTNTPYPGESPAEKYPADSYPPETGVHGVNSTLRGNSTGVTVSQAVGRLPAADALLYAVGLIATAFFML	0.691	22	0.741	22	0.895	16	0.792	0.769	Y	0.45	SignalP-noTM		extr 27	DMGPTNKAPANVDPSFNGNTIDVDPSVAQNGPGGVPPPTAVDEVDAIDGNQINSVPAPGGPGVAPPAGGPVDDTNGQHIQHAGPPGGPVPVPPPAGGQVDATHGQQNPPAGPPAGPPAGPPAGPDVDISGLPNACKASCGAIAETIQGCMNSIQANSRQGAPSQVDESQLEDLTHKAMQCICSNPAADLTKSFTPCVECLRTNTPGAEAESIDQVIQTFQAQCQAHSGSTQAPRPGESQVVPPPPASTNTPYPGESPAEKYPADSYPPETGVHGVNSTLRGNSTGVTVSQAVGRLPAADALLYAVGLIATAFFML	315	none	0.08	plas 25, cyto 3, nucl 2, cyto_mito 2	plas		-	-	-	-	-	-	-	-	-	-	-	-	-	-	-
g1251.t1	Dreco_g1251	MRLANLAITALGLAYLGFAQTGPRLCGLKIAPCPWDMTCKPDSDTCIDLDLCQGTCVLKNKYPPCGGHGPDAPKCDDQSECFTDPRTGGCGLACGEPGICVPKSHDGCGGFFERPCSKGTFCYDDPRDSCVPIRGKVRCDSICL	0.425	20	0.594	20	0.884	3	0.822	0.717	Y	0.45	SignalP-noTM		extr 19, mito 3, nucl 2, vacu 2	TGPRLCGLKIAPCPWDMTCKPDSDTCIDLDLCQGTCVLKNKYPPCGGHGPDAPKCDDQSECFTDPRTGGCGLACGEPGICVPKSHDGCGGFFERPCSKGTFCYDDPRDSCVPIRGKVRCDSICL	124	none	0.08	extr 31	extr	Cluster03657	-	-	-	-	-	-	-	-	-	-	-	-	-	-	-
g1272.t1	Dreco_g1272	MKLAPAATLLLAGAASAAKDRRTFAVLRFNNKQLTKGRMDPIVNPGQVSPHVHSVLGGSGFALGSTGGDLVRSNCSTAMIKGDNSNYWFPSLYFKDPKTGRFEDVDIFYANAYYFFEPTNDDIKAFPLGLAMVSGDVNSRTPPAGGAQANLTVNPVRWTCPRLNNNFEPPSWPAGSDGKMAGMGDPINKGEGVGFPSMECDGFASPLRADIHFPSCYDPEAGLTAYKKNTVFPSEAGGGKMDCPKGHVHLPHLFLEVYWNTPAFKDRWQAGTGKQPFVLSNGDATGYSLHGDFMAGWDEKLLQHIIDTCDVGTAGMDKCPGLFHGLNKDEGCTTKPATDEKVDGVLDALPGKNPLTGWAYGGGDIQPPLDEAGTQPKVSSTAGRREGGRNSPAASSTHH…	0.304	18	0.408	18	0.704	14	0.529	0.473	Y	0.45	SignalP-noTM		extr 17, mito 6, pero 2	KDRRTFAVLRFNNKQLTKGRMDPIVNPGQVSPHVHSVLGGSGFALGSTGGDLVRSNCSTAMIKGDNSNYWFPSLYFKDPKTGRFEDVDIFYANAYYFFEPTNDDIKAFPLGLAMVSGDVNSRTPPAGGAQANLTVNPVRWTCPRLNNNFEPPSWPAGSDGKMAGMGDPINKGEGVGFPSMECDGFASPLRADIHFPSCYDPEAGLTAYKKNTVFPSEAGGGKMDCPKGHVHLPHLFLEVYWNTPAFKDRWQAGTGKQPFVLSNGDATGYSLHGDFMAGWDEKLLQHIIDTCDVGTAGMDKCPGLFHGLNKDEGCTTKPATDEKVDGVLDALPGKNPLTGWAYGGGDIQPPLDEAGTQPKVSSTAGRREGGRNSPAASSTHHDADNQVALPAKMAASPSQ…	459	none	0.06	nucl 15.5, cyto_nucl 11.5, mito 8, cyto 6.5	nucl	Cluster03673	-	-	PF09362|Domain of unknown function (DUF1996)|6.7E-57;	PTHR32208:SF23||4.1E-35;PTHR32208||4.1E-35;	-	-	-	-	-	-	-	-	-	-	-
g1291.t1	Dreco_g1291	MVFAVLLAVLALATRGWGAEQLTSPSAVQAFVQTLENTFTIDKTSRPYRESITHREASDWNYFFTCPNTQWGDRLVLKSISKTKIVYNEHVDSRILLNDGNQQSTIKAVDSVAIQVASSKGWKIGGSFELGAGGSSGNLAGKLAVSAEYSDVETESRTVTSSLEVDILCDPGNVCSLRTLTFFAEVEGLCSTEPFIKCDTAQIFCDDNYWKENSVDQWSDSWRTHCRPSQRRLKPCSVTFPIFDTDRKPLTRLRVVTEGPA	0.746	19	0.839	19	0.972	10	0.94	0.893	Y	0.45	SignalP-noTM		extr 20, plas 4, E.R. 2	EQLTSPSAVQAFVQTLENTFTIDKTSRPYRESITHREASDWNYFFTCPNTQWGDRLVLKSISKTKIVYNEHVDSRILLNDGNQQSTIKAVDSVAIQVASSKGWKIGGSFELGAGGSSGNLAGKLAVSAEYSDVETESRTVTSSLEVDILCDPGNVCSLRTLTFFAEVEGLCSTEPFIKCDTAQIFCDDNYWKENSVDQWSDSWRTHCRPSQRRLKPCSVTFPIFDTDRKPLTRLRVVTEGPA	242	none	0.2	nucl 18, cyto_nucl 15.5, cyto 7, extr 5	nucl		-	-	-	-	-	-	-	-	-	-	-	-	-	-	-
g1377.t1	Dreco_g1377	MPSTTTKALILFAASALAAVIYPPGEGSSSSHAKVQVPETAPRQTAWRTHHGPLPAAVTPTVTLPIACDYSYCDGSTSWCFYWAGVTSYDPFRGPVPGETRVELGPCTVPPPPPPARTGHS	0.345	28	0.537	19	0.909	13	0.879	0.722	Y	0.45	SignalP-noTM		extr 25	SSSHAKVQVPETAPRQTAWRTHHGPLPAAVTPTVTLPIACDYSYCDGSTSWCFYWAGVTSYDPFRGPVPGETRVELGPCTVPPPPPPARTGHS	93	none	0.05	extr 13, nucl 10, cyto 8	extr		-	-	-	-	-	-	-	-	-	-	-	-	-	-	-
g1378.t1	Dreco_g1378	MHPLTALVAGLGLAAAGVPTRRATTTYGLQISYDGANFFDGFDFFTQPDPTHGFVQYVDRAAAQQAGLIRTDGDGATYMGVDYKTVNPSAGRQSVRITSKQAFTKGLFLADISHMPGAICGVWPAFWMFGPNWPTSGEIDIIEGVHTQTSAIVSLHTGPGCEVNNAGSLQTTSMSKFNCAEQGVGCSQKSTDTQNYGNGFNGVNGGVYATEWTSDHIAVWFFPRSGIPADISAGHPNPSSWGLPLARFASSGQGCDIDSHFRDNNLVFDTTFCGDWAGAVWDTTPECKAKATTCTEYVSKNPADFEDAYWKVNSVKVYQLTDAPAPAPAPAPAPAPAPAPAPAPAPAPAPAPAPAPAPAPAPAPAPAPAPAPAPAPEPTSAPPVDNNNNNDNHYTGGND…	0.347	17	0.511	17	0.8	1	0.735	0.632	Y	0.45	SignalP-noTM		extr 25	VPTRRATTTYGLQISYDGANFFDGFDFFTQPDPTHGFVQYVDRAAAQQAGLIRTDGDGATYMGVDYKTVNPSAGRQSVRITSKQAFTKGLFLADISHMPGAICGVWPAFWMFGPNWPTSGEIDIIEGVHTQTSAIVSLHTGPGCEVNNAGSLQTTSMSKFNCAEQGVGCSQKSTDTQNYGNGFNGVNGGVYATEWTSDHIAVWFFPRSGIPADISAGHPNPSSWGLPLARFASSGQGCDIDSHFRDNNLVFDTTFCGDWAGAVWDTTPECKAKATTCTEYVSKNPADFEDAYWKVNSVKVYQLTDAPAPAPAPAPAPAPAPAPAPAPAPAPAPAPAPAPAPAPAPAPAPAPAPAPAPAPEPTSAPPVDNNNNNDNHYTGGNDASGAPDTIVDSKGNRFT…	450	450 - VRRSRPRRLRKL - 461	0.13	nucl 13, mito 12, cyto_nucl 10.5, cyto 6, E.R._mito 6, mito_pero 6	nucl	Cluster02266	Q4X084|EGLX_ASPFU|8e-78	-	PF00722|Glycosyl hydrolases family 16|3.5E-7;	PTHR10963||1.8E-114;PTHR10963:SF34||1.8E-114;	SSF49899||7.82E-37;SSF49899||7.82E-37;	-	-	-	-	-	-	G3DSA:2.60.120.200||1.8E-14;	-	-	-
g1396.t1	Dreco_g1396	MRSALGSAIAATATAAALIFDAASAQTWSKCNPINAQCPADTALGMTVNVDFRNGGVNSFFATGTPSYHAGGVNFTVTSSGDAPQLNSLFYIMFGRVDITMTAAHGAGIVSSLVLESDTLDEIDIEWLGANPDEIQSNYFGKGRTTTYNRGQFHSVKGTQDRLIKYTVDWTKDRIVWIADGQAVRTLAKEDAEADQYPQTPMKVKFGSWAGGDVNRNPQGTVDWARGPTDYSRGPFHMLVQSVVVTDYSTGKEYRYKDQTGKWEAIEAVGGSVNSNVDGKNALTITAVASARPAATAGFLPVPVGGIGRDESAATRTQTGWPWVGGANPTGGTIPSGWYMRSDGKISRSSAGPSMLQSLSVLTATLLPLAAGVLTFLHRS	0.532	26	0.594	26	0.792	15	0.666	0.633	Y	0.45	SignalP-noTM		extr 23, plas 2	TWSKCNPINAQCPADTALGMTVNVDFRNGGVNSFFATGTPSYHAGGVNFTVTSSGDAPQLNSLFYIMFGRVDITMTAAHGAGIVSSLVLESDTLDEIDIEWLGANPDEIQSNYFGKGRTTTYNRGQFHSVKGTQDRLIKYTVDWTKDRIVWIADGQAVRTLAKEDAEADQYPQTPMKVKFGSWAGGDVNRNPQGTVDWARGPTDYSRGPFHMLVQSVVVTDYSTGKEYRYKDQTGKWEAIEAVGGSVNSNVDGKNALTITAVASARPAATAGFLPVPVGGIGRDESAATRTQTGWPWVGGANPTGGTIPSGWYMRSDGKISRSSAGPSMLQSLSVLTATLLPLAAGVLTFLHRS	354	none	0	mito 12, cyto 7, nucl 5, plas 4, cyto_golg 4	mito	Cluster03742	D4ALQ5|CRH11_ARTBC|2e-82	-	PF00722|Glycosyl hydrolases family 16|2.5E-41;	PTHR10963:SF38||2.2E-111;PTHR10963||2.2E-111;	SSF49899||2.11E-45;	-	-	-	-	-	-	G3DSA:2.60.120.200||1.7E-55;	-	-	-
g1412.t1	Dreco_g1412	MMHLFSPRQGLVFHLLFSVQCFTVSAVDTALGNGPLDSSQALRVPLGALPNDHDDFHLPEENQGAIPWTISSHVAGKPPPPPSLVFRYDLRDPDEVFSDGFKTRQLEREGRPSLVGWDISRHTYGSEENLESTNYVSTTRLPKVAEEFGDDLDSGGEHSFFDSAELTEAAKRQNPDGSVNYHHPIADVLEDAAARPPKMGYIYIIKPDPSFINVFQTLGPDGFQDKTNLRQQEFAAMVEIKSDRIIGGYDLADPEKVIEFNPGYNQAYDRQRAGVGYRRLAHNSNEVISNMARIIRDSAELESRKLRQEAALRHAPRHEWESMSLSRFIQEFTDRNAPPPTSTATYPSHQGGPAEDERAGTSSARTLKRPLDTAEDDGGSGIGGKHRCPRSEGCNPKHV…	0.391	27	0.564	27	0.911	18	0.809	0.697	Y	0.45	SignalP-noTM		extr 17, golg 5, E.R. 2, mito 1, cyto 1, vacu 1, cyto_mito 1	DTALGNGPLDSSQALRVPLGALPNDHDDFHLPEENQGAIPWTISSHVAGKPPPPPSLVFRYDLRDPDEVFSDGFKTRQLEREGRPSLVGWDISRHTYGSEENLESTNYVSTTRLPKVAEEFGDDLDSGGEHSFFDSAELTEAAKRQNPDGSVNYHHPIADVLEDAAARPPKMGYIYIIKPDPSFINVFQTLGPDGFQDKTNLRQQEFAAMVEIKSDRIIGGYDLADPEKVIEFNPGYNQAYDRQRAGVGYRRLAHNSNEVISNMARIIRDSAELESRKLRQEAALRHAPRHEWESMSLSRFIQEFTDRNAPPPTSTATYPSHQGGPAEDERAGTSSARTLKRPLDTAEDDGGSGIGGKHRCPRSEGCNPKHVTNPVMTASTGQGESKADGTNADHVKEL…	493	495 - KPGRYRTRHRTSLNRRPRNRNHKRGD - 520	0.57	nucl 22.5, cyto_nucl 16, cyto 8.5	nucl	Cluster00192	-	-	PF01375|Heat-labile enterotoxin alpha chain|2.3E-4;	-	SSF56399||2.11E-10;SSF56399||2.11E-10;	-	-	-	-	-	-	G3DSA:3.90.210.10||4.9E-24;G3DSA:3.90.210.10||4.9E-24;	-	-	-
g1452.t1	Dreco_g1452	MKIEYLSIGLLSLLTPLSAAWSKEDREIFRIRDEISSHESDPAATFYDILGISPSASQDDINKAYRMKTRSLHPDKVKQQLKAERARAAASKPSGRAAKPPTASEVKSAVKVAGERQARLSLIANILRGPSRARYDHFLANGFPLWKGTDYYYSRYRPGLGTVVFGLFVLGGGAIHYLVLYMSWKRQKEFVERYVKFARTTAWGNSAGIPNIESASGPTLGSTPGTSTPVDEDGMPMAMNRRQRRMQERETKREDSRGRVKRLRKAQSVSRDPSSNPAPAGARRRVVAENGKVLVVDSVGDVFLEEEDEEGNLNEYLLDPNELLQPTFKDTAIVRLPVWIFNKGLGRFLANGAANADGHAQDDSDTPQHTPTGTDSASEDFEMLDKSTESLSKAKASGS…	0.441	23	0.553	20	0.855	18	0.72	0.643	Y	0.45	SignalP-noTM		extr 8, cyto 6.5, cyto_nucl 5.5, E.R. 4, nucl 3.5, mito 2, pero 2	EDREIFRIRDEISSHESDPAATFYDILGISPSASQDDINKAYRMKTRSLHPDKVKQQLKAERARAAASKPSGRAAKPPTASEVKSAVKVAGERQARLSLIANILRGPSRARYDHFLANGFPLWKGTDYYYSRYRPGLGTVVFGLFVLGGGAIHYLVLYMSWKRQKEFVERYVKFARTTAWGNSAGIPNIESASGPTLGSTPGTSTPVDEDGMPMAMNRRQRRMQERETKREDSRGRVKRLRKAQSVSRDPSSNPAPAGARRRVVAENGKVLVVDSVGDVFLEEEDEEGNLNEYLLDPNELLQPTFKDTAIVRLPVWIFNKGLGRFLANGAANADGHAQDDSDTPQHTPTGTDSASEDFEMLDKSTESLSKAKASGSQNTGKANKRRSKKR	390	82 - KAERARAAASKPSGRAAKP - 100	0.78	cyto 7, E.R. 7, extr 5, pero 4.5, cyto_plas 4.5, nucl 4, mito_pero 4	cyto	Cluster03497	Q9P7C1|YKU3_SCHPO|8e-24	-	PF00226|DnaJ domain|9.4E-10;	-	SSF46565||1.83E-13;SSF46565||1.83E-13;	-	-	-	PS50076|dnaJ domain profile.|12.324;	SM00271|DnaJ molecular chaperone homology domain|5.4E-5;	-	G3DSA:1.10.287.110||2.3E-12;	-	-	PR00625|DnaJ domain signature|2.1E-6;PR00625|DnaJ domain signature|2.1E-6;
g1481.t1	Dreco_g1481	MKLSILIALLPAVLAAPAKRAEPAPLLTPRGADSIIADKYIVKFKDGASIASVDQTVNALTQKAEHIFSNAFRGFSGHLSKDELKTLRHHPDVEYVEQDAVVTISALVTQPGAPWGLGRISHRRPGNTTYEYDSSAGAGTCSYVIDTGIESSHPEFEGRASQIRSFIIGQKTDGHGHGTHCAGTIGAKTFGVAKKTKIYGVKVLDNSGRGSYAGIIAGIDFSIRDSRSRKCPKGVVANMSLGGGFSQAVNSAAAAMIRAGIFLAVAAGNDNTDASNYSPASEPTVCTVGASTSSDERSDFSNYGPVVDIYAPGSDVLSTWIGGRTNRISGTSMASPHIAGLGAYFGALRGFSDPQVLCKQLQTIATKDVLSDIPSDTFNLLAFNGNPHGEE	0.656	16	0.769	16	0.947	15	0.891	0.835	Y	0.45	SignalP-noTM		extr 26	PAKRAEPAPLLTPRGADSIIADKYIVKFKDGASIASVDQTVNALTQKAEHIFSNAFRGFSGHLSKDELKTLRHHPDVEYVEQDAVVTISALVTQPGAPWGLGRISHRRPGNTTYEYDSSAGAGTCSYVIDTGIESSHPEFEGRASQIRSFIIGQKTDGHGHGTHCAGTIGAKTFGVAKKTKIYGVKVLDNSGRGSYAGIIAGIDFSIRDSRSRKCPKGVVANMSLGGGFSQAVNSAAAAMIRAGIFLAVAAGNDNTDASNYSPASEPTVCTVGASTSSDERSDFSNYGPVVDIYAPGSDVLSTWIGGRTNRISGTSMASPHIAGLGAYFGALRGFSDPQVLCKQLQTIATKDVLSDIPSDTFNLLAFNGNPHGEE	375	none	0.19	cyto 17, E.R._mito 6.5, mito 4.5, E.R. 3.5, plas 3, nucl 2	cyto	Cluster00077	P29138|CUDP_METAN|1e-178	2117|PHI:2117|SPM1|P58371|148305|Magnaportheoryzae(related:Magnaporthegrisea)|Reducedvirulence|3e-90	PF05922|Peptidase inhibitor I9|4.1E-12;PF00082|Subtilase family|2.6E-38;	PTHR10795:SF389||4.5E-144;PTHR10795||4.5E-144;	SSF54897||3.68E-18;SSF52743||2.88E-75;	-	-	PS00137|Serine proteases, subtilase family, histidine active site.|-;PS00136|Serine proteases, subtilase family, aspartic acid active site.|-;PS00138|Serine proteases, subtilase family, serine active site.|-;	-	-	-	G3DSA:3.30.70.80||8.0E-24;G3DSA:3.40.50.200||1.0E-76;	-	-	PR00723|Subtilisin serine protease family (S8) signature|4.9E-19;PR00723|Subtilisin serine protease family (S8) signature|4.9E-19;PR00723|Subtilisin serine protease family (S8) signature|4.9E-19;
g1500.t1	Dreco_g1500	MRFDLALLSLSLLSTASAIALETPRDGVRIELSARDDLQRIKRRGGGGGRSRGSSNRNTRPNYNTGGTSKSGTGVTPRFGGGRYYSGGATKPFASGRRSALGIAPIMLVGAALAFWPGLWLHGAWVYPYSHVHHYHNASSGEDETANVVCGCARFAACGCDENNNTAYYDDLLGNGSYAALNKSVVDMGEYNGSKTILINGTLANGTTAAQETPTQSAQNAQNTKVSAASSITSIAHAAGYWPAVAAVVAAVFMT	0.561	19	0.71	19	0.943	11	0.901	0.813	Y	0.45	SignalP-noTM		extr 21, plas 4	ALETPRDGVRIELSARDDLQRIKRRGGGGGRSRGSSNRNTRPNYNTGGTSKSGTGVTPRFGGGRYYSGGATKPFASGRRSALGIAPIMLVGAALAFWPGLWLHGAWVYPYSHVHHYHNASSGEDETANVVCGCARFAACGCDENNNTAYYDDLLGNGSYAALNKSVVDMGEYNGSKTILINGTLANGTTAAQETPTQSAQNAQNTKVSAASSITSIAHAAGYWPAVAAVVAAVFMT	236	42 - KRRGGGGGRSR - 52	0.05	plas 22, nucl 3, mito 3, mito_nucl 3	plas	Cluster03555	-	-	-	PTHR42091||4.7E-52;	-	-	-	-	-	-	-	-	-	-	-
g1544.t1	Dreco_g1544	MVFLSTTMDALLLAFLSLPNPYLYVQFAPVAYIVKLHIELTMASLIGKVVQSDNNDLDTSYVDESRITRTDSHSNYVPFPSRSGGTAGSRRASAQSRLAGNQGDVHAGSSNPYLHLGMCPEEDSVSISREDTTAAVVTENDMERGEAGCNDGGNIPGSPKAETSSGTCRPPTTDTKSVTGHSTKGEEGEKAE	0.222	44	0.307	25	0.877	6	0.71	0.525	Y	0.45	SignalP-noTM		extr 10, cyto 6.5, cyto_nucl 4.5, mito 4, E.R. 2, nucl 1.5	LIGKVVQSDNNDLDTSYVDESRITRTDSHSNYVPFPSRSGGTAGSRRASAQSRLAGNQGDVHAGSSNPYLHLGMCPEEDSVSISREDTTAAVVTENDMERGEAGCNDGGNIPGSPKAETSSGTCRPPTTDTKSVTGHSTKGEEGEKAE	148	none	0.18	cyto_nucl 13, nucl 12, extr 10, cyto 10	cyto_nucl		-	-	-	PTHR35179:SF1||2.3E-12;PTHR35179||2.3E-12;	-	-	-	-	-	-	-	-	-	-	-
g1547.t1	Dreco_g1547	MRFPLLAVLAAASVLAHPADLHELDARSWPDVTAFLAKVAALFPVNVAIQEICGAITAAEVGIATFFRIPLDRYDGCGDVTMLFARGTCDAGNVGVLTGPWFFKTLADKLWWSRRSLAVQGFEYPATVDGYFKGSKDNGWVFANVIKNKLARCPGTKLVLSGYSQGGMVIHQAAAVLDRATMSKVSAVVIFGDPYSKRPISNIDASKVKIFCHEGDNICDNGPLVLWEHLNYAEDAEDAADFIISRI	0.358	17	0.555	17	0.909	1	0.841	0.709	Y	0.45	SignalP-noTM		extr 19, cyto 3, mito 2, cyto_nucl 2, pero 2	PADLHELDARSWPDVTAFLAKVAALFPVNVAIQEICGAITAAEVGIATFFRIPLDRYDGCGDVTMLFARGTCDAGNVGVLTGPWFFKTLADKLWWSRRSLAVQGFEYPATVDGYFKGSKDNGWVFANVIKNKLARCPGTKLVLSGYSQGGMVIHQAAAVLDRATMSKVSAVVIFGDPYSKRPISNIDASKVKIFCHEGDNICDNGPLVLWEHLNYAEDAEDAADFIISRI	230	none	0.03	cyto 16.5, cyto_nucl 11, mito 6, extr 3, E.R._mito 3	cyto	Cluster03568	Q9Y7G8|CUTI_PYRBR|5e-48	407|PHI:407|PBC1|CAB40372|76659|Pyrenopezizabrassicae|Lossofpathogenicity|5e-50	PF01083|Cutinase|1.7E-41;	PTHR15087:SF13||6.4E-55;PTHR15087||6.4E-55;	SSF53474||1.06E-33;	-	-	PS00155|Cutinase, serine active site.|-;	-	-	-	G3DSA:3.40.50.1820||1.7E-39;	-	-	PR00129|Cutinase signature|3.3E-8;PR00129|Cutinase signature|3.3E-8;
g1549.t1	Dreco_g1549	MVGVKTVAALLLAALPFGTSSPVPVAAPGGSNKYIVKLKDGIRSRELATHLEWVNDVHARSIGRRHLDLSGLDKKFEIGNFNAYSGAFDDATIEEIRNKPEVSYVEPDQVWTLFETAMQNKKTQFNSTYGLATLSHRKPGSRNYVYDSSAGEGGYVYVIDSGVNIDHVEFQGRATRGYNAAGGEFIDGIGHGTHVSGVVAGKRFGVAKKANIIDVKVFMDHSSQTSTILDGFQWAVADIAAKGRRGRAVINMSLGGIISEAFDEAVENAFQSGILSIVAAGNEYQDASNLSPARAPNALTVGAVDEDWLAWRGFGSQGSNYGPAVDIHAPGKDILSSWIGSTTATRSDTGTSMAAPHVAGLAIYLAILEGITDPAALTSRIKELGTRDSTENLPKNTVN…	0.403	21	0.595	21	0.94	13	0.885	0.752	Y	0.45	SignalP-noTM		extr 25	PVPVAAPGGSNKYIVKLKDGIRSRELATHLEWVNDVHARSIGRRHLDLSGLDKKFEIGNFNAYSGAFDDATIEEIRNKPEVSYVEPDQVWTLFETAMQNKKTQFNSTYGLATLSHRKPGSRNYVYDSSAGEGGYVYVIDSGVNIDHVEFQGRATRGYNAAGGEFIDGIGHGTHVSGVVAGKRFGVAKKANIIDVKVFMDHSSQTSTILDGFQWAVADIAAKGRRGRAVINMSLGGIISEAFDEAVENAFQSGILSIVAAGNEYQDASNLSPARAPNALTVGAVDEDWLAWRGFGSQGSNYGPAVDIHAPGKDILSSWIGSTTATRSDTGTSMAAPHVAGLAIYLAILEGITDPAALTSRIKELGTRDSTENLPKNTVNLLANNGSED	387	none	0.08	cyto 22.5, cyto_nucl 17, nucl 6.5	cyto	Cluster00241	A1CIA7|ORYZ_ASPCL|1e-134	2117|PHI:2117|SPM1|P58371|148305|Magnaportheoryzae(related:Magnaporthegrisea)|Reducedvirulence|3e-68	PF00082|Subtilase family|6.4E-36;PF05922|Peptidase inhibitor I9|3.5E-16;	PTHR10795||2.1E-111;PTHR10795:SF420||2.1E-111;	SSF52743||1.44E-66;	-	-	PS00138|Serine proteases, subtilase family, serine active site.|-;PS00136|Serine proteases, subtilase family, aspartic acid active site.|-;PS00137|Serine proteases, subtilase family, histidine active site.|-;	-	-	-	G3DSA:3.40.50.200||4.6E-71;G3DSA:3.30.70.80||7.8E-20;	-	-	PR00723|Subtilisin serine protease family (S8) signature|2.4E-16;PR00723|Subtilisin serine protease family (S8) signature|2.4E-16;PR00723|Subtilisin serine protease family (S8) signature|2.4E-16;
g1555.t1	Dreco_g1555	MLLPRPLLAFAALGHAAQPGAVKPVAAPMRDLTWGQLNFLHTTDTHGWLGGHMREPQYSADWGDYISFSNHLRKRADDAGTDLLLVDTGDRIEGNGLYDASTPKGLFQYDIYAQQHVDIICIGNHELYQAYSADREHNTTVPNFKHNYIASNLDYVDSSGRRKPLAQRYRRFKTKNQKLDIIAFGFLFDFTGNANNSVVQPVAETVKEPWFQEAMRQKPDLFVVIGHVGLRMEEFRTIFTALRKQNWHIPIIFFGGHAHVRDALSYDAQSVSLASGRYMETVGWLSVDGLKPKSASASASSSVKFSRKYIDNNLYGMHYHTGLNETTFPTEEGVRISGMISRARKSLQLDEQYGCAPKDLWLNRAKYPGKDSIYSWIQDEVFPDIIVNETRKSKPRLAL…	0.208	17	0.375	17	0.778	16	0.676	0.537	Y	0.45	SignalP-noTM		extr 13, nucl 3, pero 3, mito 2, cyto 2, vacu 2, cyto_mito 2	QPGAVKPVAAPMRDLTWGQLNFLHTTDTHGWLGGHMREPQYSADWGDYISFSNHLRKRADDAGTDLLLVDTGDRIEGNGLYDASTPKGLFQYDIYAQQHVDIICIGNHELYQAYSADREHNTTVPNFKHNYIASNLDYVDSSGRRKPLAQRYRRFKTKNQKLDIIAFGFLFDFTGNANNSVVQPVAETVKEPWFQEAMRQKPDLFVVIGHVGLRMEEFRTIFTALRKQNWHIPIIFFGGHAHVRDALSYDAQSVSLASGRYMETVGWLSVDGLKPKSASASASSSVKFSRKYIDNNLYGMHYHTGLNETTFPTEEGVRISGMISRARKSLQLDEQYGCAPKDLWLNRAKYPGKDSIYSWIQDEVFPDIIVNETRKSKPRLALMNTGGMRFDIFKGPFTR…	572	none	0.29	cyto 19.5, cyto_nucl 13.5, nucl 6.5, extr 2, pero 2	cyto	Cluster03592	Q9US39|YFZ2_SCHPO|1e-122	-	PF00149|Calcineurin-like phosphoesterase|4.1E-9;	PTHR11575||1.4E-166;PTHR11575:SF22||1.4E-166;PTHR11575:SF22||1.4E-166;PTHR11575||1.4E-166;	SSF55816||7.46E-58;SSF56300||4.24E-66;	-	-	-	-	-	-	G3DSA:3.60.21.10||2.4E-97;G3DSA:3.90.780.10||3.6E-55;G3DSA:3.90.780.10||3.6E-55;	-	PIRSF017316||4.1E-198;	-
g1564.t1	Dreco_g1564	MLSLTLHLLVALAAAAAGAASPEQSMGFACGAGMPSNQLIAAHEFYSQHKGAARRSQGPPKVKVAVWLHAIASSVKSETGRMTINTMKKQLALLNSDFAKTGFSFYLKAFDRTFNHRWAQGLDKPTMKSALHKGKMDTLNVYVVERVEYNSSAIVGECALPSHGLGYRDGIVINVSTVPRGRDNRNRIRFGRTLTHETGHWLGLLHPFHAQQCGVDGDYVDDTPPQAHPSRECGQSSSCTGPETAVVDNIMDYYPDACRLHFTPGQVARMHELWKVFRDPDSSVRRSSAEDSVKSFLNNIL	0.422	21	0.619	21	0.99	10	0.903	0.772	Y	0.45	SignalP-noTM		extr 22, plas 3	PEQSMGFACGAGMPSNQLIAAHEFYSQHKGAARRSQGPPKVKVAVWLHAIASSVKSETGRMTINTMKKQLALLNSDFAKTGFSFYLKAFDRTFNHRWAQGLDKPTMKSALHKGKMDTLNVYVVERVEYNSSAIVGECALPSHGLGYRDGIVINVSTVPRGRDNRNRIRFGRTLTHETGHWLGLLHPFHAQQCGVDGDYVDDTPPQAHPSRECGQSSSCTGPETAVVDNIMDYYPDACRLHFTPGQVARMHELWKVFRDPDSSVRRSSAEDSVKSFLNNIL	280	none	0.09	cyto 17.5, cyto_nucl 12.1667, cyto_pero 10.3333, nucl 5.5, extr 5	cyto	Cluster02219	D4DIV0|MEP7_TRIVH|5e-47	479|PHI:479|MEP1|AAQ07436|199306|Coccidioidesposadasii|Reducedvirulence|6e-41	PF05572|Pregnancy-associated plasma protein-A|1.0E-14;	PTHR19325:SF359||1.4E-28;PTHR19325||1.4E-28;	SSF55486||1.32E-16;	-	-	-	-	-	-	G3DSA:3.40.390.10||1.7E-6;	-	-	-
g1574.t1	Dreco_g1574	MRRDVVLASLLGLLAHCLPSTGQEESVSCSASTATYETQFRDDLQQFGVQATIGPPDHPIETPGGALDDNDDDDGYDRKLYDSQAEKVEAVKLAAVPKTKPKPAAAEVKKSLVLDPSSNFGKWEGWGTSLSWWAKAFGDRDDLANLFFSKNTQKINGKSLPGLGLNIARYNAGASSDKGYHGYTMQRSPNARQSRLIDGYWLNWQSRNPASSSWDWTVDANQRSMLKKAKAAGANTFELFSVSPMWWMTYSHNPSGSVPAGLTDNLQSWNYDAHAIYLSSIAQHARDNWGIDFHSIEPFNEPSTHWQGDKGKQEGCYFEYGTMGKVLAELKEKMKNRGLTSLITGVDANTYDVAIATWQNLDGSSRQTIEKINVHGYQYTAGDRNALYSIAKKNGKVLW…	0.474	23	0.617	23	0.901	10	0.803	0.717	Y	0.45	SignalP-noTM		extr 25	EESVSCSASTATYETQFRDDLQQFGVQATIGPPDHPIETPGGALDDNDDDDGYDRKLYDSQAEKVEAVKLAAVPKTKPKPAAAEVKKSLVLDPSSNFGKWEGWGTSLSWWAKAFGDRDDLANLFFSKNTQKINGKSLPGLGLNIARYNAGASSDKGYHGYTMQRSPNARQSRLIDGYWLNWQSRNPASSSWDWTVDANQRSMLKKAKAAGANTFELFSVSPMWWMTYSHNPSGSVPAGLTDNLQSWNYDAHAIYLSSIAQHARDNWGIDFHSIEPFNEPSTHWQGDKGKQEGCYFEYGTMGKVLAELKEKMKNRGLTSLITGVDANTYDVAIATWQNLDGSSRQTIEKINVHGYQYTAGDRNALYSIAKKNGKVLWQSEYGDNDATGKQMCTCILLDFA…	546	none	0.12	cyto_nucl 15.6667, cyto 15.5, nucl 12.5, cyto_golg 11	cyto_nucl	Cluster03604	Q76FP5|6GAL_HYPRU|0	-	PF14587|O-Glycosyl hydrolase family 30|1.2E-19;	PTHR11069||4.8E-100;PTHR11069:SF8||4.8E-100;	SSF51445||1.52E-30;	-	-	-	-	-	-	G3DSA:2.60.40.1180||4.7E-8;G3DSA:3.20.20.80||2.5E-85;	-	-	-
g1580.t1	Dreco_g1580	MLLLYLWGKFIAAFSHLQGLSSTTNQLDNNDLQYDASNTPVPGCYGVADIMDPSNICPSEQMLLMNGLSPALTDSIAANLWDADSLDVTWRHPSPVADSMACLQNAAVHAPITSQTLMSTSALGPEPCLPGRSSAEEPRFDGIEQHVAAAGMETLNDSSVAFFGDSFRETTPPANKQNCGQHKEPAAKVVSDLAQPWNCWEHIGFGEPFLSAVESMLISESSRGRNSVLAQVKPLIDTSDGKMPPITAGFLSRLLHGVQHELPTAWSLAMALSVDRHSWQCDRPRTTLASILMSQLSGLIPKEQLLQLIGACL	0.226	23	0.388	23	0.912	11	0.668	0.539	Y	0.45	SignalP-noTM		extr 21, mito 3, cyto 2, mito_nucl 2	TNQLDNNDLQYDASNTPVPGCYGVADIMDPSNICPSEQMLLMNGLSPALTDSIAANLWDADSLDVTWRHPSPVADSMACLQNAAVHAPITSQTLMSTSALGPEPCLPGRSSAEEPRFDGIEQHVAAAGMETLNDSSVAFFGDSFRETTPPANKQNCGQHKEPAAKVVSDLAQPWNCWEHIGFGEPFLSAVESMLISESSRGRNSVLAQVKPLIDTSDGKMPPITAGFLSRLLHGVQHELPTAWSLAMALSVDRHSWQCDRPRTTLASILMSQLSGLIPKEQLLQLIGACL	290	none	0.25	nucl 12.5, cyto_nucl 12, cyto 10.5, extr 7	nucl		-	-	-	-	-	-	-	-	-	-	-	-	-	-	-
g1581.t1	Dreco_g1581	MHFKDFLPALFLFAAAILQVGDAAQSKCTSSEISRMNVTHCDCAGVEHGCSSNCPVCDVTNLTKAVYHCATAGCTDNQYDCGGCGIFFHSLCDCIQGTVDCPTSSPFKVNSNPIWVLLPAKAPHDPLITTTERLPGILEMGHGHDHGWIYAQEKYNSKTESLWLNSVRARDMEQVHVHMCKRNENTAKILSHENIVSSSHLVQLKNDTELYCLGVDHNVTITGFSGALSSFLAKPPVCKELIGAGILHDHKNRTWACASTTHMGPKGKFC	0.535	24	0.686	24	0.965	14	0.88	0.791	Y	0.45	SignalP-noTM		extr 20, cyto 3, mito 2, pero 2	QSKCTSSEISRMNVTHCDCAGVEHGCSSNCPVCDVTNLTKAVYHCATAGCTDNQYDCGGCGIFFHSLCDCIQGTVDCPTSSPFKVNSNPIWVLLPAKAPHDPLITTTERLPGILEMGHGHDHGWIYAQEKYNSKTESLWLNSVRARDMEQVHVHMCKRNENTAKILSHENIVSSSHLVQLKNDTELYCLGVDHNVTITGFSGALSSFLAKPPVCKELIGAGILHDHKNRTWACASTTHMGPKGKFC	246	none	0.01	cyto_nucl 17, cyto 14, nucl 10, extr 7	cyto_nucl	Cluster07809	-	-	-	-	-	-	-	-	-	-	-	G3DSA:3.30.428.30||4.9E-4;	-	-	-
g1596.t1	Dreco_g1596	MLGKHAALLLLGHTARLVVVFAAAAQPYDFGVDVSRLTRRQDASTPIVVGKLPLATNGSVPLRLEVRQLKADQRRWDLFILAMSMFQSADQDDPLSWYQIAGIHGVPFVPWNGVEASPGANQSGYCPHSSVLFPTWHRPYLALFEQQMFRMANAIAGMFANATDRQLYQQAASDFRVPYWDWSRSAPAGQTHLPDFFWSPIVAQNGPNGMQNIKNPLFSYQFHPLDPEALIWNPLKQWNETKRGPEMSISLEAPPSNNSKANAALLSKLPEIQQRLYILFSNYHDFNAFSNKAWAVSRGLSMLDSIESIHDIIHIYGGSKGHMTYVPLSSFDPLFFMHHIMTDRIIAMWQILNPSTWISPMAAGETTFTSLKGTLQSSSTPLTPFYSSPDGTFWDSDMS…	0.206	23	0.433	23	0.966	14	0.91	0.691	Y	0.45	SignalP-noTM		extr 17, mito 5, plas 2, E.R. 2	AAQPYDFGVDVSRLTRRQDASTPIVVGKLPLATNGSVPLRLEVRQLKADQRRWDLFILAMSMFQSADQDDPLSWYQIAGIHGVPFVPWNGVEASPGANQSGYCPHSSVLFPTWHRPYLALFEQQMFRMANAIAGMFANATDRQLYQQAASDFRVPYWDWSRSAPAGQTHLPDFFWSPIVAQNGPNGMQNIKNPLFSYQFHPLDPEALIWNPLKQWNETKRGPEMSISLEAPPSNNSKANAALLSKLPEIQQRLYILFSNYHDFNAFSNKAWAVSRGLSMLDSIESIHDIIHIYGGSKGHMTYVPLSSFDPLFFMHHIMTDRIIAMWQILNPSTWISPMAAGETTFTSLKGTLQSSSTPLTPFYSSPDGTFWDSDMSRTTEAFGYTYADTDPSLGSDDAI…	613	none	0.32	nucl 16.5, cyto_nucl 16, cyto 12.5	nucl	Cluster03620	Q92396|TYRO_PODAS|5e-70	-	PF00264|Common central domain of tyrosinase|1.5E-48;	PTHR11474:SF32||5.3E-124;PTHR11474:SF32||5.3E-124;PTHR11474||5.3E-124;PTHR11474||5.3E-124;	SSF48056||8.67E-58;SSF48056||8.67E-58;	-	-	PS00497|Tyrosinase CuA-binding region signature.|-;PS00498|Tyrosinase and hemocyanins CuB-binding region signature.|-;	-	-	-	G3DSA:1.10.1280.10||3.0E-71;	-	-	PR00092|Tyrosinase copper-binding domain signature|6.3E-12;PR00092|Tyrosinase copper-binding domain signature|6.3E-12;PR00092|Tyrosinase copper-binding domain signature|6.3E-12;PR00092|Tyrosinase copper-binding domain signature|6.3E-12;
g1600.t1	Dreco_g1600	MKLTNALLSATIASATLASARFINGTSSFDVQLKDKFYKPAAEFFWDVVNHKNAQLSDSTHTWIMALTTDVQPYIQTMANKAEFLPYLAQLNSKFPDLVDNVRVAVANSKPWVQDQQRCRDARTAVGDLRTALTHFAKFIALSLTSSGWVADRSADVVSKEHDVDVILARLTQEFKEGSCIDRVARN	0.314	21	0.419	21	0.673	13	0.551	0.49	Y	0.45	SignalP-noTM		extr 20, mito 3, pero 2, cyto_mito 2	FINGTSSFDVQLKDKFYKPAAEFFWDVVNHKNAQLSDSTHTWIMALTTDVQPYIQTMANKAEFLPYLAQLNSKFPDLVDNVRVAVANSKPWVQDQQRCRDARTAVGDLRTALTHFAKFIALSLTSSGWVADRSADVVSKEHDVDVILARLTQEFKEGSCIDRVARN	166	none	0.05	cyto 20.5, cyto_nucl 14.5, mito 6, nucl 3.5	cyto	Cluster03619	-	-	-	-	-	-	-	-	-	-	-	-	-	-	-
g1680.t1	Dreco_g1680	MKLTISVLLLGALATSVVATAIPDIGQEADIAEEGVSTLEEKAGLADPARARCRGICGPHGCHCLRPIRVCPCRVVGRPCSCR	0.745	20	0.841	20	0.981	12	0.947	0.898	Y	0.45	SignalP-noTM		extr 16, vacu 4, plas 3, E.R. 2	AIPDIGQEADIAEEGVSTLEEKAGLADPARARCRGICGPHGCHCLRPIRVCPCRVVGRPCSCR	63	none	0.14	extr 27, nucl 2.5, cyto_nucl 2.5	extr		-	-	-	-	-	-	-	-	-	-	-	-	-	-	-
g1684.t1	Dreco_g1684	MLIEFATLLLLSFIMAHIIPATLLHRLRSMETDVYTPNPAPGDTAVPGDTTPASDDGYNPTPIDIAVTRIMLVRSLRLPPDLVDAIFDFAEYWAHSTNAINYTTEHQDCLRVSGSSHLEDRFLLRSYPLGLTGIDGARNLVEELAYDTNEAKPLPLSEEHDRLFFAKLVRYPTPRLANPCRKIVFSLRSRDQGYGGQVGARGTYRAAWTWFEAGLERFDATQDCDSKCTYDVRHEVPSSTAPQLPVCSIRPMRPAIQRDGPDQDFEYVHPLHGQASLEIHRNKVATWDWQDHVVTWSYRDNTAADSDGGKVLDEEGRGRATGDGSFVRGLKIGDVVTVWAKARFPGWINFVESVKIDIYWAV	0.587	17	0.737	17	0.956	4	0.926	0.839	Y	0.45	SignalP-noTM		extr 16, cyto 4, E.R. 4, pero 2	IIPATLLHRLRSMETDVYTPNPAPGDTAVPGDTTPASDDGYNPTPIDIAVTRIMLVRSLRLPPDLVDAIFDFAEYWAHSTNAINYTTEHQDCLRVSGSSHLEDRFLLRSYPLGLTGIDGARNLVEELAYDTNEAKPLPLSEEHDRLFFAKLVRYPTPRLANPCRKIVFSLRSRDQGYGGQVGARGTYRAAWTWFEAGLERFDATQDCDSKCTYDVRHEVPSSTAPQLPVCSIRPMRPAIQRDGPDQDFEYVHPLHGQASLEIHRNKVATWDWQDHVVTWSYRDNTAADSDGGKVLDEEGRGRATGDGSFVRGLKIGDVVTVWAKARFPGWINFVESVKIDIYWAV	345	none	0.09	cyto_nucl 14, cyto 12.5, nucl 8.5, extr 6, mito 3, extr_plas 3	cyto_nucl	Cluster04793	-	-	-	-	-	-	-	-	-	-	-	-	-	-	-
g1688.t1	Dreco_g1688	MGLVLFLLAPVLALATPILDAVSVAVQPKQPINGTAEYTTQCKTCPYNLCTNVNVPWGGDKVVLTCWTNGDLVGDTRRWLKTIDSCYITEYDLIEYAGDFSADLKYCGQVSLDITRQAAAVRYLSECKWAPSTSSESMQFYGRDVDVTLTCWTEGYTKIMGDWFWYKTTDNCHVSGSGLWKAPDRSKLNNCGPGPGPRINETRRSIDAVEESPALKSKRNEEDDPPSRRWLQAEKIGEEYAPCFSCASGSRNSTCGVVKTYEFNDTVVSQCLTSEDVAFPNGSFSSKTWMLTTDWCYVDGLDFWVPPWDHYRYPRCDRWKVYA	0.748	16	0.856	16	0.991	11	0.981	0.924	Y	0.45	SignalP-noTM		extr 18, plas 3, golg 3, cyto 1, E.R. 1, vacu 1	PILDAVSVAVQPKQPINGTAEYTTQCKTCPYNLCTNVNVPWGGDKVVLTCWTNGDLVGDTRRWLKTIDSCYITEYDLIEYAGDFSADLKYCGQVSLDITRQAAAVRYLSECKWAPSTSSESMQFYGRDVDVTLTCWTEGYTKIMGDWFWYKTTDNCHVSGSGLWKAPDRSKLNNCGPGPGPRINETRRSIDAVEESPALKSKRNEEDDPPSRRWLQAEKIGEEYAPCFSCASGSRNSTCGVVKTYEFNDTVVSQCLTSEDVAFPNGSFSSKTWMLTTDWCYVDGLDFWVPPWDHYRYPRCDRWKVYA	307	none	0.13	nucl 18.5, cyto_nucl 12.5, extr 10	nucl		-	-	-	-	-	-	-	-	-	-	-	-	-	-	-
g1693.t1	Dreco_g1693	MRASASIAIMASLANVAVGQMNFLNLLGNLNPFRGLLPGAQAAQAPPPSDTAMAGARNQWRADTVVVSRFLSMAESFSPSQIESEAATALAAENDELTHKAILDRQFISSATPDKAVVDANDVLEIQGTFQFIVDGLKRLSTGGSVMSPQQISATIRAMNEDRCAQVLPSIDVYFAAVDTLLQDTNLTQAKRPTNCPVGLGKPAANGSNAEAKEVRFAKKGRKTSRKI	0.497	20	0.508	20	0.755	1	0.481	0.493	Y	0.45	SignalP-noTM		extr 21, mito 3, cyto 2, mito_nucl 2	MNFLNLLGNLNPFRGLLPGAQAAQAPPPSDTAMAGARNQWRADTVVVSRFLSMAESFSPSQIESEAATALAAENDELTHKAILDRQFISSATPDKAVVDANDVLEIQGTFQFIVDGLKRLSTGGSVMSPQQISATIRAMNEDRCAQVLPSIDVYFAAVDTLLQDTNLTQAKRPTNCPVGLGKPAANGSNAEAKEVRFAKKGRKTSRKI	208	216 - RFAKKGRKTSRKI - 228	0.36	nucl 15, cyto_nucl 15, cyto 7, mito 6	nucl	Cluster08960	-	-	-	-	-	-	-	-	-	-	-	-	-	-	-
g1706.t1	Dreco_g1706	MADANNYLSLLALQFVLLMTVTFSSPVLAAPRPPNSTCVSSPVSSASRAVDCTRGGMCDCTHIPDKNSEEYFQCVTSPECEHCWITVSATTMTATMTTTTTTTTTTTTITITHLPPKASSYSSHISAQPFYTSSAALWSSWHLSSLPPTSPSPSYKPSSLPVTDFGTLPPGTYTVSASNITSTIVVPTEDMVESASNSSPGSLTTVVRTEVMTIKPPPSYTTRPFTTGLPSVPFTVEFPEPSNAEDGEKKRCAALCDCARDGSDEDALLESVLRPDRTPFRVLTDKSI	0.766	30	0.81	30	0.96	18	0.858	0.836	Y	0.45	SignalP-noTM		extr 15, mito 4, plas 3, E.R. 2, cyto_mito 2	PRPPNSTCVSSPVSSASRAVDCTRGGMCDCTHIPDKNSEEYFQCVTSPECEHCWITVSATTMTATMTTTTTTTTTTTTITITHLPPKASSYSSHISAQPFYTSSAALWSSWHLSSLPPTSPSPSYKPSSLPVTDFGTLPPGTYTVSASNITSTIVVPTEDMVESASNSSPGSLTTVVRTEVMTIKPPPSYTTRPFTTGLPSVPFTVEFPEPSNAEDGEKKRCAALCDCARDGSDEDALLESVLRPDRTPFRVLTDKSI	258	none	0.41	mito 11.5, cyto_mito 9, extr 8, nucl 6.5, cyto_nucl 6.5, mito_pero 6.5	mito		-	-	-	-	-	-	-	-	-	-	-	-	-	-	-
g1710.t1	Dreco_g1710	MHHPTLAVVAAVLAAFPAEAMYAKSSPVLQVNGGKSFNRLIRDSNYTTIVEFYAPWCGHCKNLKPAYEKAARNLEGLANVAAVDCDDEANKKLCSDHGVEGFPTLKVIRPSKKAGGFPVIDDYQGPRTATGITEVVASKINNFVVRVTDNELATFLASDGPKAILFTEKGKTSALLKSVAIDFLDVISVGQVRHKDKESVAKYGIEKFPTLILIHGGKTTTYDGELKKKEIVQFLSQAGQPHPDPRSVKADASDKSKSKAKSKAKPAKSPEAEKAEPEDAEAENSSQDSADGEPKAAPTPEVIPIPIVTEKAGLVEKCLQRKSTTCVLALAPPETSENGEKAFASLSQLNTKYIQGHRHLFPLLSIPGDLDGLKPLKESLGLSADVEVIALNVRRGWWR…	0.367	21	0.524	21	0.888	3	0.741	0.641	Y	0.45	SignalP-noTM		extr 13, cyto 7, E.R. 4, golg 2	YAKSSPVLQVNGGKSFNRLIRDSNYTTIVEFYAPWCGHCKNLKPAYEKAARNLEGLANVAAVDCDDEANKKLCSDHGVEGFPTLKVIRPSKKAGGFPVIDDYQGPRTATGITEVVASKINNFVVRVTDNELATFLASDGPKAILFTEKGKTSALLKSVAIDFLDVISVGQVRHKDKESVAKYGIEKFPTLILIHGGKTTTYDGELKKKEIVQFLSQAGQPHPDPRSVKADASDKSKSKAKSKAKPAKSPEAEKAEPEDAEAENSSQDSADGEPKAAPTPEVIPIPIVTEKAGLVEKCLQRKSTTCVLALAPPETSENGEKAFASLSQLNTKYIQGHRHLFPLLSIPGDLDGLKPLKESLGLSADVEVIALNVRRGWWRRYDGDFGVLSVENWIDAIRMG…	457	255 - KSKSKAKSKAKPAKSP - 270	0.14	cyto 19.5, cyto_nucl 13, nucl 5.5, mito 4	cyto	Cluster04836	Q869Z0|Y5025_DICDI|2e-47	2644|PHI:2644|thioredoxin1|P0AA28|90371|SalmonellaentericaserovarTyphimurium|Reducedvirulence|2e-07	PF00085|Thioredoxin|2.2E-24;	PTHR18929:SF103||1.9E-56;PTHR18929||1.9E-56;	SSF52833||1.09E-26;SSF52833||1.11E-10;	-	-	PS00194|Thioredoxin family active site.|-;	PS51352|Thioredoxin domain profile.|15.771;	-	-	G3DSA:3.40.30.10||2.2E-32;G3DSA:3.40.30.10||5.3E-11;	-	-	PR00421|Thioredoxin family signature|2.3E-6;PR00421|Thioredoxin family signature|2.3E-6;PR00421|Thioredoxin family signature|2.3E-6;
g1715.t1	Dreco_g1715	MKSILAGLLAFGLLVHAAPADVPTENKTVQQPGILQLPLVPIARKSRRVEPPILLDTAEEEETANTTVKKRQVEGKLYPDLTQIYYAVALSIGTPPQRVLADIDTASSLTWVFDSSGTSRNSVDPDFVFDKLRSQTLVPVGQQTTQRYGGGYWFVTANAYMDEIALGPAALGSMKFGIAAQQDSNMDRPLVGLAFPHDSERPDFILDRMVDRGVINSRAFSVYISDQRIRTGSILFGGIDRTMYTGALQRVPMIPSPLSRKGRFTRPTVQMSRLSILEPTGSGAVIFDKGQGPPSAQFQNPYITSEGIGFVIDTGAPMCYFPPHILANVLVQFPNAHKNGEHFQVDCSLRHDPRVLKFEFGAHATIHVPMKDFVWQSQDQSCWLGATEAPGKTPQLGIS…	0.72	21	0.799	21	0.962	12	0.884	0.845	Y	0.45	SignalP-noTM		extr 21, plas 4	VPTENKTVQQPGILQLPLVPIARKSRRVEPPILLDTAEEEETANTTVKKRQVEGKLYPDLTQIYYAVALSIGTPPQRVLADIDTASSLTWVFDSSGTSRNSVDPDFVFDKLRSQTLVPVGQQTTQRYGGGYWFVTANAYMDEIALGPAALGSMKFGIAAQQDSNMDRPLVGLAFPHDSERPDFILDRMVDRGVINSRAFSVYISDQRIRTGSILFGGIDRTMYTGALQRVPMIPSPLSRKGRFTRPTVQMSRLSILEPTGSGAVIFDKGQGPPSAQFQNPYITSEGIGFVIDTGAPMCYFPPHILANVLVQFPNAHKNGEHFQVDCSLRHDPRVLKFEFGAHATIHVPMKDFVWQSQDQSCWLGATEAPGKTPQLGISFLRSAYVTFDYDNLAVHMAQS…	426	none	0.27	mito 11.5, cyto 8.5, cyto_nucl 8.5, mito_pero 7, nucl 5.5, extr 2, E.R. 2	mito	Cluster00364	Q12303|YPS3_YEAST|7e-24	73|PHI:73|SAP3|AAA34372|5476|Candidaalbicans|Reducedvirulence|3e-19	PF00026|Eukaryotic aspartyl protease|1.9E-43;	PTHR13683||2.3E-49;PTHR13683||2.3E-49;PTHR13683:SF318||2.3E-49;PTHR13683:SF318||2.3E-49;	SSF50630||8.67E-54;	-	-	-	-	-	-	G3DSA:2.40.70.10||1.2E-23;G3DSA:2.40.70.10||5.7E-27;	-	-	PR00792|Pepsin (A1) aspartic protease family signature|1.6E-12;PR00792|Pepsin (A1) aspartic protease family signature|1.6E-12;PR00792|Pepsin (A1) aspartic protease family signature|1.6E-12;PR00792|Pepsin (A1) aspartic protease family signature|1.6E-12;
g1722.t1	Dreco_g1722	MFFRSTAAALVASSSLVYAQTSTVCNPLATSTTIQYNGQGAVFTVGKETDAPTIMTSKYIFFGRVDVVLQAAPGQGIVTSVVLQSDDLDEIDWEWIGSDSSQAQTNYFSKGNTSTYDRGKFHPVSNPASTFHTYGIQWNSTAVVWTIDAAVVRTLAYNDANGGQGFPQTPMQVKLGSWVAGRGSAAPGTVQWAGGYADWSKAPFSAYYKSISVVDYAGADEPTTKSVKEYVYGDQSGTFKSIRCN	0.512	20	0.626	20	0.838	7	0.759	0.698	Y	0.45	SignalP-noTM		extr 26	TSTVCNPLATSTTIQYNGQGAVFTVGKETDAPTIMTSKYIFFGRVDVVLQAAPGQGIVTSVVLQSDDLDEIDWEWIGSDSSQAQTNYFSKGNTSTYDRGKFHPVSNPASTFHTYGIQWNSTAVVWTIDAAVVRTLAYNDANGGQGFPQTPMQVKLGSWVAGRGSAAPGTVQWAGGYADWSKAPFSAYYKSISVVDYAGADEPTTKSVKEYVYGDQSGTFKSIRCN	225	none	0.03	cyto_nucl 14.5, nucl 12.5, cyto 11.5, mito 4	cyto_nucl	Cluster00851	Q8J0P4|CRF1_ASPFU|1e-75	-	PF00722|Glycosyl hydrolases family 16|4.1E-42;	PTHR10963:SF27||4.6E-95;PTHR10963||4.6E-95;	SSF49899||1.07E-51;	-	-	-	-	-	-	G3DSA:2.60.120.200||6.1E-58;	-	-	-
g1733.t1	Dreco_g1733	MQMSKILSILAVAIVSTAAAPTPDSVETGVLLKKSEMALADEDDLIEKANGDFIQRRDLASIEVRGLAHYGKHDDILGPQDYTERVKDAVPMGCPHAVPDDKFKRGGCYNYIKRDGAQYAIPEGCPEAAPDAKVKRGGCYNYIKRDGVQYAVPEGCPEAAPDAKVKRGGCYNYIKRDGVQYAVPEGCPEAAPDAKVKRSGCYTYIKRDGQYAVPEGCPRVILDAKVKRGGCYTYIKRDGVHHAVPADCPQVAPNSNAKRGGCYNYIKRGALNMGRKPFDSLLITTTDEGFDRHC	0.573	20	0.705	20	0.92	10	0.874	0.796	Y	0.45	SignalP-noTM		extr 15, E.R. 4, mito 2, cyto 2, plas 2, cyto_mito 2	PTPDSVETGVLLKKSEMALADEDDLIEKANGDFIQRRDLASIEVRGLAHYGKHDDILGPQDYTERVKDAVPMGCPHAVPDDKFKRGGCYNYIKRDGAQYAIPEGCPEAAPDAKVKRGGCYNYIKRDGVQYAVPEGCPEAAPDAKVKRGGCYNYIKRDGVQYAVPEGCPEAAPDAKVKRSGCYTYIKRDGQYAVPEGCPRVILDAKVKRGGCYTYIKRDGVHHAVPADCPQVAPNSNAKRGGCYNYIKRGALNMGRKPFDSLLITTTDEGFDRHC	274	none	0.18	cyto 14, extr 12, nucl 6, extr_plas 6	cyto		-	-	-	-	-	-	-	-	-	-	-	-	-	-	-
g1740.t1	Dreco_g1740	MLAMCPWKLLLPCLLGMTLVHPPPRESDLPGTIIVVIDLTPGHGPSVAKAPNGKGDHHQTEDTIKAWKQQGTKRLVDPNPPRNADNIRVALEQNGIMYTNAPMWNLDELNWHPLHTVSDKHQGFPSSTVV	0.236	21	0.454	21	0.926	4	0.871	0.679	Y	0.45	SignalP-noTM		extr 19, mito 4, vacu 2	PPPRESDLPGTIIVVIDLTPGHGPSVAKAPNGKGDHHQTEDTIKAWKQQGTKRLVDPNPPRNADNIRVALEQNGIMYTNAPMWNLDELNWHPLHTVSDKHQGFPSSTVV	109	none	0.1	cyto 13, cyto_nucl 11, mito 9, nucl 7	cyto		-	-	-	-	-	-	-	-	-	-	-	-	-	-	-
g1742.t1	Dreco_g1742	MRLWKILLPCLLGLALANPPQPQKTDLAGASRAPIDPAAAGFYRWLVIVRHMLPGYRLVSANVPHSFGGNIQVTEDTFAWFRQQGIGHVIFSDADGIAEHTLAAFRNHNMEVTIVPRFGDDMEQNWISLFAVWLALRRFHDGTAVLSDSDAAFGWGGVVISALQMLCLNEMGLLHKFTKDDYSRNGINRVFMVQFANTFLKHPAAAQGEKQIRFGTATVL	0.802	18	0.853	18	0.945	10	0.908	0.883	Y	0.45	SignalP-noTM		extr 20, mito 7	PPQPQKTDLAGASRAPIDPAAAGFYRWLVIVRHMLPGYRLVSANVPHSFGGNIQVTEDTFAWFRQQGIGHVIFSDADGIAEHTLAAFRNHNMEVTIVPRFGDDMEQNWISLFAVWLALRRFHDGTAVLSDSDAAFGWGGVVISALQMLCLNEMGLLHKFTKDDYSRNGINRVFMVQFANTFLKHPAAAQGEKQIRFGTATVL	202	none	0.04	cyto_nucl 13, cyto 10.5, nucl 8.5, extr 5, mito 5	cyto_nucl	Cluster02646	-	-	-	-	-	-	-	-	-	-	-	-	-	-	-
g1743.t1	Dreco_g1743	MRLWKILLPCLLGLTLADPPQAPKDDLPGSRGRLLNPVEGGFYRWVVLDRNLAPGHRLVSSNAAFSYNNAVIHVTDLTFVVLLQQGIDHVVICGMVEVSEEIQAEFERNGIRLTMIRGFVNDPYENWILLFTLWNIVRQHVDSTAIWSGIDTAWSEAGVVISALQILSLHSVGQLRLLSEEDYSRNDVNRMEMIRFVWTFFDFVEANVRVVGQDASSPRQSPGTAGAVAENDVDAEDPGPDPGRENGHDAEDTSPSSAHENDHGAEDSGSASSQESCATVIDLQRVTDDSREQSCSGHSPGLVRVVPDEDAGAEDPSAAAASGHEKTDGAEGSSSGSRHKSKDMSPPQHLPARLERESRELRASLNSTISLELSRADVHAEVCARVSPAASEPVVVLVP…	0.828	18	0.866	18	0.935	10	0.909	0.889	Y	0.45	SignalP-noTM		extr 19, cyto 3, mito 2, pero 2	PPQAPKDDLPGSRGRLLNPVEGGFYRWVVLDRNLAPGHRLVSSNAAFSYNNAVIHVTDLTFVVLLQQGIDHVVICGMVEVSEEIQAEFERNGIRLTMIRGFVNDPYENWILLFTLWNIVRQHVDSTAIWSGIDTAWSEAGVVISALQILSLHSVGQLRLLSEEDYSRNDVNRMEMIRFVWTFFDFVEANVRVVGQDASSPRQSPGTAGAVAENDVDAEDPGPDPGRENGHDAEDTSPSSAHENDHGAEDSGSASSQESCATVIDLQRVTDDSREQSCSGHSPGLVRVVPDEDAGAEDPSAAAASGHEKTDGAEGSSSGSRHKSKDMSPPQHLPARLERESRELRASLNSTISLELSRADVHAEVCARVSPAASEPVVVLVPWEQPTTAAGGAGALAAPG…	768	none	0.24	cyto 11.5, cyto_nucl 10, nucl 7.5, pero 5, plas 3, mito 3	cyto	Cluster02646	-	-	-	-	-	-	-	-	-	-	-	-	-	-	-
g1746.t1	Dreco_g1746	MKFNLAASFLLVASALSSPIAEANTAEVNFNRVELADPQNWVAGISLFPSQIIAGYNAELDAYTAEQWADHVLSQCKSFRACTSTISFAADNSGDTGGRYWYGYVFRGGPTTPSNYRRSPRGNVSDSAAYTVA	0.47	26	0.594	26	0.938	11	0.769	0.689	Y	0.45	SignalP-noTM		extr 25	EVNFNRVELADPQNWVAGISLFPSQIIAGYNAELDAYTAEQWADHVLSQCKSFRACTSTISFAADNSGDTGGRYWYGYVFRGGPTTPSNYRRSPRGNVSDSAAYTVA	107	none	0.04	extr 13, nucl 8, cyto 8, cyto_nucl 8	extr	Cluster02645	-	-	-	-	-	-	-	-	-	-	-	-	-	-	-
g1749.t1	Dreco_g1749	MPSMLLKSFTLALAASLASLGLAAPNPVDTASAAGAAADAYSNAVFFSNRGIYKQKYQPQDLPLSDITHVFYSFVGVLSNGTVVSVDRHADLQKKYLHHAWERSGTNAYGCVKELYLLKKHNRMTKTILSVGGWGSSRIFRAVAATKTGRDVFAKSAVEFMKDWGFDGIDIDWKYAENAKEADDMLLLLHAIRDEMDRYAVKFAAGYHFELSMAAPAGADKYKHYRLGELGQLVDRINLIAYDFAGIWSKTSGHQANLHADGKQAASASVEGAVRHYLDAGVPSSKMHLGMPTYGRSFEATSGIGMPFTGVGKGSWEPGMWDYKVLPKSGATVRFDNVSMAAYSYDAATNELISFDTTQTVEGKVAYLKSKGLGGSMFWEASADRKGNSSLVGASHRAL…	0.501	24	0.679	24	0.983	14	0.916	0.807	Y	0.45	SignalP-noTM		extr 16, mito 9	PNPVDTASAAGAAADAYSNAVFFSNRGIYKQKYQPQDLPLSDITHVFYSFVGVLSNGTVVSVDRHADLQKKYLHHAWERSGTNAYGCVKELYLLKKHNRMTKTILSVGGWGSSRIFRAVAATKTGRDVFAKSAVEFMKDWGFDGIDIDWKYAENAKEADDMLLLLHAIRDEMDRYAVKFAAGYHFELSMAAPAGADKYKHYRLGELGQLVDRINLIAYDFAGIWSKTSGHQANLHADGKQAASASVEGAVRHYLDAGVPSSKMHLGMPTYGRSFEATSGIGMPFTGVGKGSWEPGMWDYKVLPKSGATVRFDNVSMAAYSYDAATNELISFDTTQTVEGKVAYLKSKGLGGSMFWEASADRKGNSSLVGASHRALGRLDTSQNWLEYRDSKYDNIRNGM…	412	none	0.07	cyto 14.5, cyto_nucl 13.5, nucl 9.5, extr 3, mito 3	cyto	Cluster00042	P32470|CHI1_APHAL|1e-158	144|PHI:144|CHT42|AAC05829|29875|Trichodermavirens|Reducedvirulence|2e-149	PF00704|Glycosyl hydrolases family 18|8.3E-68;	PTHR11177||1.0E-103;PTHR11177||1.0E-103;	SSF51445||1.78E-86;SSF51445||1.78E-86;SSF54556||3.51E-20;	-	-	-	-	SM00636||1.5E-106;	-	G3DSA:3.20.20.80||2.5E-91;G3DSA:3.20.20.80||2.5E-91;G3DSA:3.10.50.10||7.2E-27;	-	-	-
g1750.t1	Dreco_g1750	MPSKLVKSLALALAASCVSLGLASPRPCVRQGAAEIAKPINGASPAKAASPEIAKAASPVEAAIPAKAESTVEAAVPAAETVAGYVNAVYFTSWSIYDRKYQPDDLPLSDITHVLYSFLKLLPNGTVVAGDPNADLERRFPTDVWGESGTNAYGCVKQLYRLKKENRMTKLMLSIGGWGSSANFAGVAATPETRAIFAETAVELMKDWGFDGIDVDWEYPQNEIEGNHMLLLLRAVRQELDKYAATFAHGHHFELSIAAPAGPANYANYPLYELGQLLDHVNIMAYDFAGPWSKTSAHHANLYMNSENLESTSLAADGVVQHYLDEGVPAAKMILGMPVYGRSFQQTGDIGRPYNGIGDGSWEKGAWDYKALPKAGATVRFDNISMAAYSYDASTKELI…	0.371	24	0.558	24	0.931	14	0.837	0.709	Y	0.45	SignalP-noTM		extr 24, mito 1, E.R. 1, golg 1	PRPCVRQGAAEIAKPINGASPAKAASPEIAKAASPVEAAIPAKAESTVEAAVPAAETVAGYVNAVYFTSWSIYDRKYQPDDLPLSDITHVLYSFLKLLPNGTVVAGDPNADLERRFPTDVWGESGTNAYGCVKQLYRLKKENRMTKLMLSIGGWGSSANFAGVAATPETRAIFAETAVELMKDWGFDGIDVDWEYPQNEIEGNHMLLLLRAVRQELDKYAATFAHGHHFELSIAAPAGPANYANYPLYELGQLLDHVNIMAYDFAGPWSKTSAHHANLYMNSENLESTSLAADGVVQHYLDEGVPAAKMILGMPVYGRSFQQTGDIGRPYNGIGDGSWEKGAWDYKALPKAGATVRFDNISMAAYSYDASTKELISFDTTETVVAKVAYLKSKGLGGSM…	446	none	0.08	cyto 14, mito 12, nucl 3, pero 3	cyto	Cluster00042	P32470|CHI1_APHAL|1e-171	144|PHI:144|CHT42|AAC05829|29875|Trichodermavirens|Reducedvirulence|1e-157	PF00704|Glycosyl hydrolases family 18|4.2E-75;	PTHR11177||2.6E-113;PTHR11177||2.6E-113;	SSF51445||7.91E-97;SSF51445||7.91E-97;SSF54556||7.5E-20;	-	-	PS01095|Chitinases family 18 active site.|-;	-	SM00636||8.9E-120;	-	G3DSA:3.10.50.10||1.0E-25;G3DSA:3.20.20.80||4.3E-101;G3DSA:3.20.20.80||4.3E-101;	-	-	-
g1756.t1	Dreco_g1756	MHFRISATGLLAMAVSVLAQTADFDPIYKPASDENVPAGNSYQVTWTSPAKYSNGTVSIHLIGGDSPATLTPIMDIATGVKNSANSYVWNVAGSLGDKKVYGLVFKWEKDPSIYQYSNPFHIKGSGPQSSSSPSMTSVRPTTSIPDVRNSIVTASTSTTSCSTRSTIFETSTCNEVGCTGSIGMTASVAPTPPVVAPTPPVVMPAEPKTPVSSETPVIPPGPVLPETGETPGTPVDDEPVLPIINEEPVKPVVNPEPVKPAVNQEPVVNQEPVVNQEPVVNQEPVVNQETVVNQEPAINQEPVKPAVNQEPVKPAVNQVPAKPAVNKEPVKPVVNQEPVKPVVNQEPAQPAVNQEPVAPVTPGKAVVPNPPKNGQVAPSEDCTTSTIRLTVSTTVTMSA…	0.564	20	0.713	20	0.924	14	0.898	0.813	Y	0.45	SignalP-noTM		extr 25	TADFDPIYKPASDENVPAGNSYQVTWTSPAKYSNGTVSIHLIGGDSPATLTPIMDIATGVKNSANSYVWNVAGSLGDKKVYGLVFKWEKDPSIYQYSNPFHIKGSGPQSSSSPSMTSVRPTTSIPDVRNSIVTASTSTTSCSTRSTIFETSTCNEVGCTGSIGMTASVAPTPPVVAPTPPVVMPAEPKTPVSSETPVIPPGPVLPETGETPGTPVDDEPVLPIINEEPVKPVVNPEPVKPAVNQEPVVNQEPVVNQEPVVNQEPVVNQETVVNQEPAINQEPVKPAVNQEPVKPAVNQVPAKPAVNKEPVKPVVNQEPVKPVVNQEPAQPAVNQEPVAPVTPGKAVVPNPPKNGQVAPSEDCTTSTIRLTVSTTVTMSASTTIISITPTGSECGLACPK…	486	none	0.1	cyto 7, pero 7, cyto_pero 7, plas 6, mito 6	cyto	Cluster02652	-	-	PF10342|Ser-Thr-rich glycosyl-phosphatidyl-inositol-anchored membrane family|4.1E-20;	-	-	-	-	-	-	-	-	-	-	-	-
g1757.t1	Dreco_g1757	MGPLSIAAAVALCALQTASAQSDPITMQDISNRIWSQLVGNQCHPFGNYALDRDMNLPPCIAEQVIALSCERMTQALEPNAPEANRNAYKDCLLNEPSTFLRDQRNCLLCKGLTKTHSPEQNEYYRTAFRKATEKFSASTPTGSLWSMTEIDKDSNAYRELPVTKPIKVSNETMAEFFRDLAGPSKLGSFRLEGAQQIGASAETKNGTSKTVKGPMQCQDPVGQEIEVIMPTGGRPTTGAGNDTRATEVKVMHVSQWNYFSFTSSTNFTYAYSWQPPVRVAGIRGRPATQEDVKTLPNGAGCGSCEKLISPEQISKAAAATVEDASELGISLLDKTAQVSGGVEGQISEAVQEKIEVAVYQEQKRNVTVSTNPPARDAQGGIRFKTPDSTRVRGQRPGN…	0.767	21	0.781	21	0.869	2	0.787	0.784	Y	0.45	SignalP-noTM		extr 15, cyto 5.5, cyto_mito 4.5, nucl 3, mito 2.5	SDPITMQDISNRIWSQLVGNQCHPFGNYALDRDMNLPPCIAEQVIALSCERMTQALEPNAPEANRNAYKDCLLNEPSTFLRDQRNCLLCKGLTKTHSPEQNEYYRTAFRKATEKFSASTPTGSLWSMTEIDKDSNAYRELPVTKPIKVSNETMAEFFRDLAGPSKLGSFRLEGAQQIGASAETKNGTSKTVKGPMQCQDPVGQEIEVIMPTGGRPTTGAGNDTRATEVKVMHVSQWNYFSFTSSTNFTYAYSWQPPVRVAGIRGRPATQEDVKTLPNGAGCGSCEKLISPEQISKAAAATVEDASELGISLLDKTAQVSGGVEGQISEAVQEKIEVAVYQEQKRNVTVSTNPPARDAQGGIRFKTPDSTRVRGQRPGNAVPNSCSQN	387	none	0.36	cyto 22, nucl 7	cyto		-	-	-	-	-	-	-	-	-	-	-	-	-	-	-
g1789.t1	Dreco_g1789	MKFIAVASILFAGVLAMPSSQCRDCDYPADRHYDDRHHGKDYLPGRGRHGHDDDYDNDGHRGYGDRYGSRDYYGDRDHYRHGDRHGDRDHRGHRDRDGHRDGHRDGHGNGNGGRRYRACPRGLLYTNPQCCSTDVGGIAGLDCKNPSRRPTSASSFKRNCAASGAQAKCCTVPVAGQALLCQNAIGV	0.743	17	0.817	17	0.95	11	0.903	0.863	Y	0.45	SignalP-noTM		extr 25	PSSQCRDCDYPADRHYDDRHHGKDYLPGRGRHGHDDDYDNDGHRGYGDRYGSRDYYGDRDHYRHGDRHGDRDHRGHRDRDGHRDGHRDGHGNGNGGRRYRACPRGLLYTNPQCCSTDVGGIAGLDCKNPSRRPTSASSFKRNCAASGAQAKCCTVPVAGQALLCQNAIGV	170	none	0.33	extr 19, cyto 7.5, cyto_nucl 6.5, nucl 4.5	extr	Cluster04866	Q9UVI4|THYD_CLAFS|2e-22	291|PHI:291|CPPH1|CAD10781|5111|Clavicepspurpurea|Unaffectedpathogenicity|3e-21	PF06766|Fungal hydrophobin|1.4E-26;	PTHR42341||3.2E-20;	SSF101751||2.22E-25;	-	-	-	-	-	-	G3DSA:3.20.120.10||2.8E-28;	-	-	-
g1799.t1	Dreco_g1799	MAFLQHFSGPASLVMLALALLLAAVVHGHTWRTKRSSLPLPPGPPAEPILGHLRIIPPYNPEYRYMQWSKDYGSDILSLSVLGQPVIVLNSVRAAVDLLAKRGANYCDRPRFVLFEVMGWVKTLTFLRNGPEFRIHRSILQKSFRESSIRQYQGLQERETTVLLRGILNTPAKWETVLRRFATAVVLGIGFGIKIERDDDPFIQIAADASYALGHGGVPAGTPVDFFPFLKVLPRFFHDRSLKFAADWRGAIRALHDKPFDAVMASKERTRSLMQQMLDQRDAQIGRGEKPELSHEDIKGAAATVFAAGQDTIYATLVVFLLNMILHPDVQTKARRLIDEVVGRDRVPSFQDRPRLPYIDLIVQETLRWCPVSPLGVPHRSLEDDVYDGYFIPAGSLVY…	0.781	29	0.857	29	0.978	11	0.94	0.902	Y	0.45	SignalP-noTM		extr 16, mito 6, cyto 3	TWRTKRSSLPLPPGPPAEPILGHLRIIPPYNPEYRYMQWSKDYGSDILSLSVLGQPVIVLNSVRAAVDLLAKRGANYCDRPRFVLFEVMGWVKTLTFLRNGPEFRIHRSILQKSFRESSIRQYQGLQERETTVLLRGILNTPAKWETVLRRFATAVVLGIGFGIKIERDDDPFIQIAADASYALGHGGVPAGTPVDFFPFLKVLPRFFHDRSLKFAADWRGAIRALHDKPFDAVMASKERTRSLMQQMLDQRDAQIGRGEKPELSHEDIKGAAATVFAAGQDTIYATLVVFLLNMILHPDVQTKARRLIDEVVGRDRVPSFQDRPRLPYIDLIVQETLRWCPVSPLGVPHRSLEDDVYDGYFIPAGSLVYANARAMTHDESTYADPENFNPDRYVSRKE…	492	none	0.29	mito 27, extr 3	mito	Cluster04903	O13345|ORDA_ASPPA|8e-53	2393|PHI:2393|RelatedtoO-methylsterigmatocystinoxidoreductase|I1R980|5518|Gibberellazeae(related:Fusariumgraminearum)|Increasedvirulence(Hypervirulence)|3e-70	PF00067|Cytochrome P450|1.7E-67;	PTHR24279:SF60||2.0E-145;PTHR24279||2.0E-145;	SSF48264||5.63E-104;	-	-	PS00086|Cytochrome P450 cysteine heme-iron ligand signature.|-;	-	-	-	G3DSA:1.10.630.10||5.7E-113;	-	-	PR00385|P450 superfamily signature|1.6E-5;PR00385|P450 superfamily signature|1.6E-5;PR00385|P450 superfamily signature|1.6E-5;PR00385|P450 superfamily signature|1.6E-5;PR00463|E-class P450 group I signature|9.3E-33;PR00463|E-class P450 group I signature|9.3E-33;PR00463|E-class P450 group I signature|9.3E-33;PR00463|E-class P450 group I signature|9.3E-33;PR00463|E-class P450 group I signature|9.3E…
g1818.t1	Dreco_g1818	MKATFAVLALAGLVAAQNFDGQPACALKCLQDGIPKAGCELTDIKCACQKQAEIQAAVASCVLGACTADEATKAQAAAAAACANVTGGSSGSTTTSTSTSTSQTTTSSATTTPTTTNASATTSPTTTGATTGTTKSSTSTSRTSTSTGTGTSTTSSNIATATGAAGAGPVVGALAAVLAAAVAL	0.723	17	0.796	17	0.92	15	0.875	0.838	Y	0.45	SignalP-noTM		extr 26	NFDGQPACALKCLQDGIPKAGCELTDIKCACQKQAEIQAAVASCVLGACTADEATKAQAAAAAACANVTGGSSGSTTTSTSTSTSQTTTSSATTTPTTTNASATTSPTTTGATTGTTKSSTSTSRTSTSTGTGTSTTSSNIATATGAAGAGPVVGALAAVLAAAVAL	167	none	0.14	plas 27, cyto_mito 2, cyto 1.5, mito 1.5	plas		-	3214|MoCDIP2|PHI:3214|G4MML4|318829|Magnaportheoryzae|mixedoutcome|3e-07	PF05730|CFEM domain|4.6E-13;	PTHR35607||1.7E-21;	-	-	-	-	-	SM00747||5.5E-6;	-	-	-	-	-
g1838.t1	Dreco_g1838	MRFFGSLLFLASFACASPAEVHGDQHELSVNLEKVVGTNTEFKATVTNNGKTDVQILKSGSIFDSRLIRKAWVSRPDGTSVEFKGMTLSVNSDVPLDENSFQHIASGGRFDVIFDLAKVYNLSGGGKFVVDAHGVFFFFEGQSTISRQVSYNSPSIEVEIDGELAAKAANANEPRNEARSVSSFAHCTPKQNAMLARAINDCVTLANAGSAGAQSSDSDRLEMYFKNSSPFVRNHISTVFEEAQQLCDVTTSEKGYRAICRTDYCGNDIIGKEIAYCPSFFEPRGYIYGGLTDTAKICFKPSRAHFVLKNAVSLTGRAKGKVVEHHEIIKLPMEHARDNPANYASFATSAKLQCVRELSWKWAWQTASEAFY	0.657	24	0.709	24	0.947	10	0.771	0.742	Y	0.45	SignalP-noTM		extr 19, mito 4.5, cyto_mito 4, cyto 2.5	QHELSVNLEKVVGTNTEFKATVTNNGKTDVQILKSGSIFDSRLIRKAWVSRPDGTSVEFKGMTLSVNSDVPLDENSFQHIASGGRFDVIFDLAKVYNLSGGGKFVVDAHGVFFFFEGQSTISRQVSYNSPSIEVEIDGELAAKAANANEPRNEARSVSSFAHCTPKQNAMLARAINDCVTLANAGSAGAQSSDSDRLEMYFKNSSPFVRNHISTVFEEAQQLCDVTTSEKGYRAICRTDYCGNDIIGKEIAYCPSFFEPRGYIYGGLTDTAKICFKPSRAHFVLKNAVSLTGRAKGKVVEHHEIIKLPMEHARDNPANYASFATSAKLQCVRELSWKWAWQTASEAFY	348	none	0.07	cyto 16.5, cyto_nucl 16, nucl 10.5, lyso 2	cyto	Cluster00505	E3QWD3|NPIIA_COLGM|2e-21	-	PF02102|Deuterolysin metalloprotease (M35) family|1.5E-26;	PTHR37016:SF3||1.3E-30;PTHR37016||1.3E-30;	SSF55486||3.33E-15;	-	-	-	PS51257|Prokaryotic membrane lipoprotein lipid attachment site profile.|5.0;	-	-	G3DSA:3.40.390.10||5.3E-13;	-	-	-
g1839.t1	Dreco_g1839	MYSSRLLQLSILALSLLVVAQAAWLEDLAHLRPRSLVRRQRAGVSDSSDTDQSTGSSPVVNVTPSIKTLTSTLSSPVNKPSSSAAAAAPTSSRRRADATSSDAPAENTSLPTPTASPTTSPDAANRSQKTSSDASPAATSTKADDENAASPTPTPVVSTSTFVVTKTNNDGSQTVETTQKLTTSTPGLNASDSAESSGMSTKTRNTVIGVVVGVGGAVVLGVLALVAWRIWGRKKQLDENDGLMDFNIVSMEKPGRASSAGPHQTPFQSTLENYHQPTTQVNASSNF	0.722	23	0.827	23	0.98	15	0.947	0.892	Y	0.45	SignalP-noTM		extr 19, plas 6	WLEDLAHLRPRSLVRRQRAGVSDSSDTDQSTGSSPVVNVTPSIKTLTSTLSSPVNKPSSSAAAAAPTSSRRRADATSSDAPAENTSLPTPTASPTTSPDAANRSQKTSSDASPAATSTKADDENAASPTPTPVVSTSTFVVTKTNNDGSQTVETTQKLTTSTPGLNASDSAESSGMSTKTRNTVIGVVVGVGGAVVLGVLALVAWRIWGRKKQLDENDGLMDFNIVSMEKPGRASSAGPHQTPFQSTLENYHQPTTQVNASSNF	264	none	0.53	plas 20, nucl 6, E.R. 2, extr 1, cyto 1, mito 1, lyso 1, cyto_mito 1, E.R._golg 1	plas	Cluster04520	-	-	PF04478|Mid2 like cell wall stress sensor|1.5E-6;	-	-	-	-	-	-	-	-	-	-	-	-
g1912.t1	Dreco_g1912	MRCNLVVAAAFAELLFATSAGATVYSAYKHSRWASRSPTHFDNRHVKRGNGKQAVYAGTFDQFIDHKNHSRGTFQQRYWWNADHYGGDRSPIVLVAPSIIDGEAYASVTTNISLPGQIAQEIHGAVVFLEHRFVGNSSAFDDYTTENLQYLNLDNILADLVHFAKTVTLDFDRNRTSTPSKAPWVLSGCGSAGAVVAWINALAPGTFWAYHSSSAPVQSISNFTQYFDVVEEAMPRNCSADLKTVMAHVDGILETGSLDERLALKDQFGFGNLTHNGDFAAAIASGIYSWEMHYLSDGYPKLHQMCDYIENKWPNSTAATPDANGVGLVKALAGFIKWIREEEIPGACDADDDEEQVAGNSTWCYDLRDTTLEHYTDTSAVNNIRLQWWMRCNEAFEFW…	0.327	23	0.517	23	0.916	4	0.817	0.679	Y	0.45	SignalP-noTM		extr 27	VYSAYKHSRWASRSPTHFDNRHVKRGNGKQAVYAGTFDQFIDHKNHSRGTFQQRYWWNADHYGGDRSPIVLVAPSIIDGEAYASVTTNISLPGQIAQEIHGAVVFLEHRFVGNSSAFDDYTTENLQYLNLDNILADLVHFAKTVTLDFDRNRTSTPSKAPWVLSGCGSAGAVVAWINALAPGTFWAYHSSSAPVQSISNFTQYFDVVEEAMPRNCSADLKTVMAHVDGILETGSLDERLALKDQFGFGNLTHNGDFAAAIASGIYSWEMHYLSDGYPKLHQMCDYIENKWPNSTAATPDANGVGLVKALAGFIKWIREEEIPGACDADDDEEQVAGNSTWCYDLRDTTLEHYTDTSAVNNIRLQWWMRCNEAFEFWMAGPGPNGGPSIVSKFLTVDASR…	513	none	0.07	nucl 21, mito 6, cyto 4	nucl	Cluster00346	D4AYS6|A1345_ARTBC|1e-31	-	PF05577|Serine carboxypeptidase S28|1.6E-42;	PTHR11010:SF23||3.2E-127;PTHR11010||3.2E-127;	SSF53474||6.15E-6;SSF53474||6.15E-6;	-	-	-	-	-	-	G3DSA:3.40.50.1820||1.5E-7;G3DSA:3.40.50.1820||1.5E-7;	-	-	-
g1943.t1	Dreco_g1943	MRNQAALLVTLAALAAPLGASPVVPRASSTPSPTQLPAVVYRGDLIPPTSYMASGGIPPEFSDKEKVTAKSFSLFWHNIGTDYDGFGLGTRDFRSAYAATSSNFSPALAFAVANNPEDFGWMYRIHATPNMVDLVNSGFKPLFGSEAEFAALGGIRWDQVEAWLQIPKNVTKASKDGPVFKGITSEELERWETAEAFFKQFPDLKWVDNPDYNPAYSQYRASEGQPQLAGKGENLPPALEQNAVDFMNRVGAAVGWKGKFPLVGPAPAAVSVDEERKKLKDHCAKSADPTACNGAATQCAARFHRDAKFEDFMACVVELTPKSAEPKV	0.535	21	0.69	21	0.934	4	0.891	0.799	Y	0.45	SignalP-noTM		extr 14, mito 10, pero 2	PVVPRASSTPSPTQLPAVVYRGDLIPPTSYMASGGIPPEFSDKEKVTAKSFSLFWHNIGTDYDGFGLGTRDFRSAYAATSSNFSPALAFAVANNPEDFGWMYRIHATPNMVDLVNSGFKPLFGSEAEFAALGGIRWDQVEAWLQIPKNVTKASKDGPVFKGITSEELERWETAEAFFKQFPDLKWVDNPDYNPAYSQYRASEGQPQLAGKGENLPPALEQNAVDFMNRVGAAVGWKGKFPLVGPAPAAVSVDEERKKLKDHCAKSADPTACNGAATQCAARFHRDAKFEDFMACVVELTPKSAEPKV	307	none	0.02	mito 26, cyto 3	mito	Cluster04647	-	-	PF01375|Heat-labile enterotoxin alpha chain|1.1E-9;	-	SSF56399||1.01E-17;SSF56399||1.01E-17;	-	-	-	-	-	-	G3DSA:3.90.210.10||3.6E-45;G3DSA:3.90.210.10||3.6E-45;	-	-	-
g1974.t1	Dreco_g1974	MTTARFRFSALLRVVTSLLAWPALCTGFFERGSLPGLNGRQSEHARTIVYENNKRQLGRQGCVAAMTAGLTESGLRNLANRAVPPSTHYPSDGLGSNKDSIGIFQQRASIYVDIGCDMDPACAASQFLRDMQAVDGWQTMDAARLCQTVQASRGLEAFGENVRAATALCEAATQPDVAGQHA	0.499	28	0.645	28	0.971	16	0.844	0.753	Y	0.45	SignalP-noTM		extr 16, mito 10	FERGSLPGLNGRQSEHARTIVYENNKRQLGRQGCVAAMTAGLTESGLRNLANRAVPPSTHYPSDGLGSNKDSIGIFQQRASIYVDIGCDMDPACAASQFLRDMQAVDGWQTMDAARLCQTVQASRGLEAFGENVRAATALCEAATQPDVAGQHA	154	none	0.25	extr 17, cyto_nucl 8.5, extr_plas 8.5, cyto 7.5	extr	Cluster00510	-	-	-	-	-	-	-	-	-	-	-	-	-	-	-
g1975.t1	Dreco_g1975	MRFSTLLAAVSVLVPVGLVAADGQPKKHFPPELQLDELLAKHNLALVPRSELTEALLELNALLKKSQAQHHGLPLFPRANSSGAGSRSSSGGGGGETQPLALDLKGLGLGDLGDAVNGITGLVSQLGGVGGLLKGFTALVNEEFLQALHDAVIYLAQLLKPPFPAMARDIVAKAQPLLALLDSLDLGSLVEPLKKADAAGLVSTVLRLLNDKNLGSIESLLTNGANLLTQSFVDETRSLIGEVSPLIQTLSNVDLKGVVDSLQPVLRKESVEGIVGLMKNAQSLLTPSFVNGTHSLVEEVSPLVQSLSQVDLKAVVDSLQPILKKEEIQRIASLLNNACDLLSKEAVASIKSVLQSVQPLIDGLGRIDLQRLVDQLEPFVNELGKLNLKGLVDALHPLL…	0.608	22	0.733	22	0.952	3	0.88	0.812	Y	0.45	SignalP-noTM		extr 26	GQPKKHFPPELQLDELLAKHNLALVPRSELTEALLELNALLKKSQAQHHGLPLFPRANSSGAGSRSSSGGGGGETQPLALDLKGLGLGDLGDAVNGITGLVSQLGGVGGLLKGFTALVNEEFLQALHDAVIYLAQLLKPPFPAMARDIVAKAQPLLALLDSLDLGSLVEPLKKADAAGLVSTVLRLLNDKNLGSIESLLTNGANLLTQSFVDETRSLIGEVSPLIQTLSNVDLKGVVDSLQPVLRKESVEGIVGLMKNAQSLLTPSFVNGTHSLVEEVSPLVQSLSQVDLKAVVDSLQPILKKEEIQRIASLLNNACDLLSKEAVASIKSVLQSVQPLIDGLGRIDLQRLVDQLEPFVNELGKLNLKGLVDALHPLLTSDSIMSIAGLLDNAKDLLTRD…	1025	none	0.08	cyto 21, cyto_nucl 15, nucl 7	cyto	Cluster08829	-	-	-	-	-	-	-	-	-	-	Coil||-;Coil||-;	-	-	-	-
g1980.t1	Dreco_g1980	MVRPSHLLSLAATAFTALAAGEVVPGAFIFEFVGGYNTTALKKAMGSKGNVRVEFEFDRLNGFSFQFHDIKNAAKMAAKLAAENAALLWHLPVTLHQSADPTTEWARNESKERMRPRKRALSNTTLDTYSPHVMTQIDKLRAKGYTGKGVRIAILDSGIDYTHSALGRCFGPRCLVSFGTDFVGDDYNGKNSPKPDDDPMDNCDGHGTHVAGIIAAKPNKFGFTGVVPDATLGAYRILGCKGHVTSDVVIAAVNQALKDKADIINLSRIVEQGVPIIVAAGNMGRMGLFAPSLPADAKGVISVATIDNAVTPIFLFQAKYTVDGADDVEFGYIPGIPSAWNGASLDVYAARVDTAAVDGGCGKLLSDETPDLTNMVVVLRSAEACNLLTWATNAKAKGA…	0.34	22	0.515	22	0.893	6	0.779	0.658	Y	0.45	SignalP-noTM		extr 19, cyto 3, mito 2, plas 2, cyto_pero 2	VVPGAFIFEFVGGYNTTALKKAMGSKGNVRVEFEFDRLNGFSFQFHDIKNAAKMAAKLAAENAALLWHLPVTLHQSADPTTEWARNESKERMRPRKRALSNTTLDTYSPHVMTQIDKLRAKGYTGKGVRIAILDSGIDYTHSALGRCFGPRCLVSFGTDFVGDDYNGKNSPKPDDDPMDNCDGHGTHVAGIIAAKPNKFGFTGVVPDATLGAYRILGCKGHVTSDVVIAAVNQALKDKADIINLSRIVEQGVPIIVAAGNMGRMGLFAPSLPADAKGVISVATIDNAVTPIFLFQAKYTVDGADDVEFGYIPGIPSAWNGASLDVYAARVDTAAVDGGCGKLLSDETPDLTNMVVVLRSAEACNLLTWATNAKAKGARYILTYPASGGMDSILPPQDAL…	1024	none	0.24	E.R._mito 7.33333, cyto 6.5, E.R. 6.5, cyto_mito 6.5, nucl 5, mito_pero 4.83333, mito 4.5, plas 2, extr 2, lyso 2, golg 2, extr_plas 2	E.R._mito	Cluster00057	P29141|SUBV_BACSU|4e-36	3662|PspB(notPD0218)|PHI:3662|Q87ET0|2371|Xylellafastidiosa|Increasedvirulence(Hypervirulence)|9e-06	PF06280|Fn3-like domain|3.7E-15;PF00082|Subtilase family|7.1E-39;	PTHR10795||1.7E-70;PTHR10795:SF363||1.7E-70;PTHR10795:SF363||1.7E-70;PTHR10795||1.7E-70;	SSF52743||8.64E-64;SSF52743||8.64E-64;	-	-	PS00136|Serine proteases, subtilase family, aspartic acid active site.|-;PS00137|Serine proteases, subtilase family, histidine active site.|-;	-	-	-	G3DSA:3.40.50.200||8.7E-67;G3DSA:3.40.50.200||8.7E-67;	-	-	PR00723|Subtilisin serine protease family (S8) signature|2.2E-17;PR00723|Subtilisin serine protease family (S8) signature|2.2E-17;PR00723|Subtilisin serine protease family (S8) signature|2.2E-17;
g1983.t1	Dreco_g1983	MRRPLLLLLAHCLLATAASLVTHGGQFVPDHVLRVSSADIAIACERRRSAVVNGTVPGPTLRILAGRRTWIRVYNDMPKENLTMHWHGLAQRMAIFSDGSPQGSQWPIPPGHFFDYELHTTSDDAGTYFYHSHVGMQALTASGPLVVEDCRPPPFRYDDERILHWSDYFRQDDAAFEAGLTAVPFVFGGESQGVLLNGKGVALGREGAEGPLGSECSLPVIDVEPGRTYRFRFIGSTGLSLVSIAFEGHVNLHVVQADAGAWTRPVWVDRIQLGSGQRFDAIFKAKTAEELRKAGGKMTYVVQYETRDRPSVYRGYAVLRYANGGDFPGRPATPPLRIPEKTNAWLEYQLQPLYPGPRGHPTLAEVTRRVVMNSSQLVDPRTGQVVWRLAGLSWTDNAA…	0.475	20	0.67	20	0.977	12	0.946	0.819	Y	0.45	SignalP-noTM		extr 20, mito 3, plas 3	VTHGGQFVPDHVLRVSSADIAIACERRRSAVVNGTVPGPTLRILAGRRTWIRVYNDMPKENLTMHWHGLAQRMAIFSDGSPQGSQWPIPPGHFFDYELHTTSDDAGTYFYHSHVGMQALTASGPLVVEDCRPPPFRYDDERILHWSDYFRQDDAAFEAGLTAVPFVFGGESQGVLLNGKGVALGREGAEGPLGSECSLPVIDVEPGRTYRFRFIGSTGLSLVSIAFEGHVNLHVVQADAGAWTRPVWVDRIQLGSGQRFDAIFKAKTAEELRKAGGKMTYVVQYETRDRPSVYRGYAVLRYANGGDFPGRPATPPLRIPEKTNAWLEYQLQPLYPGPRGHPTLAEVTRRVVMNSSQLVDPRTGQVVWRLAGLSWTDNAARTPLLVDIYKRGDAAMPSYD…	705	none	0.26	cyto_nucl 12, cyto 11, mito 11, nucl 9	cyto_nucl	Cluster01294	P37064|ASO_CUCPM|1e-52	2920|PHI:2920|FET3-1|E3QRA4|31870|Colletotrichumgraminicola|Reducedvirulence|1e-35	PF07732|Multicopper oxidase|2.2E-28;PF07731|Multicopper oxidase|1.0E-22;PF00394|Multicopper oxidase|4.5E-24;	PTHR11709:SF33||1.5E-132;PTHR11709||1.5E-132;	SSF49503||1.37E-26;SSF49503||7.62E-29;SSF49503||1.41E-25;	TIGR03390|ascorbOXfungal: L-ascorbate oxidase|4.2E-248;	-	PS00080|Multicopper oxidases signature 2.|-;PS00079|Multicopper oxidases signature 1.|-;	-	-	-	G3DSA:2.60.40.420||1.1E-22;G3DSA:2.60.40.420||1.6E-28;G3DSA:2.60.40.420||4.6E-32;	-	-	-
g1984.t1	Dreco_g1984	MDPIARSSIAAMAPTTSPFRLCVVAAVAALCVDGTLAGVAKAPESSCRRTTVAILGGGMAGIAAAQALHNASVTDFVIVEYQNRIGGRAIDSQFGRRPDGSPYTIELGANWIQGLGNPGGPENPIWSLAKKHKLANTPSNYSSILTYDETGASDYGHLLEAYEAAARKMTVEAGRLLAENLQDQSARSGLSLAGWNPRHDDMAAQAVEYWSWDWETTVPPEVSSMIFGAAGNNLTFRQFSEDNNLVVDARGYRAIIEGEAATFLTANDTRLRLNGRVTSISHDEAGVVVRSDDGSCLSAAYALCTFSLGVLQHGDVEFAPALPTWKQRAVHKFSMGTYTKIFFQFDETFWPTDKEYFLYASPTTRGYWAQWQSLSTDGFLPGSNILFATVTGDESYRLE…	0.465	38	0.535	38	0.812	25	0.563	0.55	Y	0.45	SignalP-noTM		extr 20, plas 3, mito 2, E.R. 2	VAKAPESSCRRTTVAILGGGMAGIAAAQALHNASVTDFVIVEYQNRIGGRAIDSQFGRRPDGSPYTIELGANWIQGLGNPGGPENPIWSLAKKHKLANTPSNYSSILTYDETGASDYGHLLEAYEAAARKMTVEAGRLLAENLQDQSARSGLSLAGWNPRHDDMAAQAVEYWSWDWETTVPPEVSSMIFGAAGNNLTFRQFSEDNNLVVDARGYRAIIEGEAATFLTANDTRLRLNGRVTSISHDEAGVVVRSDDGSCLSAAYALCTFSLGVLQHGDVEFAPALPTWKQRAVHKFSMGTYTKIFFQFDETFWPTDKEYFLYASPTTRGYWAQWQSLSTDGFLPGSNILFATVTGDESYRLEQLSDDEAKLEGLAVLRQMFPDRTVPEPTAFTYPRWTKT…	514	none	0.16	extr 12, lyso 8, cyto_nucl 5, nucl 4.5, mito 4	extr	Cluster04063	O64411|PAO_MAIZE|7e-85	1503|PHI:1503|GzHMG035|I1S828|5518|Gibberellazeae(related:Fusariumgraminearum)|Unaffectedpathogenicity|9e-30	PF01593|Flavin containing amine oxidoreductase|1.6E-62;	PTHR10742||4.6E-103;PTHR10742:SF288||4.6E-103;	SSF51905||2.37E-59;SSF51905||2.37E-59;SSF54373||2.94E-27;	-	-	-	-	-	-	G3DSA:3.50.50.60||2.0E-9;G3DSA:3.50.50.60||2.0E-9;G3DSA:3.90.660.10||2.1E-62;	-	-	PR00757|Flavin-containing amine oxidase signature|1.4E-7;PR00757|Flavin-containing amine oxidase signature|1.4E-7;PR00757|Flavin-containing amine oxidase signature|1.4E-7;
g1990.t1	Dreco_g1990	MPSMGPLLPVFALAAGVVVSCVAAAGVPHVDIPSCSRGKGFLEYSKSVPERTAFPRTQVGLCYSDLYLHINFVAHDEVNFYFNSSQGTNDDIWKYEVMEAFIQKGKDDPKSYLEFEVNPDNVTYQAFIFNPSKNRADGAPFEHAFIKDPAAIGIQSTTILDRDGRLWMSNVQIPLGLFGVYRDKAKGTLWRMNFFRTVVDPKTYPQQELGAWSPPDKANFHITPFFGIARFV	0.429	25	0.625	25	0.961	6	0.908	0.778	Y	0.45	SignalP-noTM		extr 21, E.R. 2, golg 2	GVPHVDIPSCSRGKGFLEYSKSVPERTAFPRTQVGLCYSDLYLHINFVAHDEVNFYFNSSQGTNDDIWKYEVMEAFIQKGKDDPKSYLEFEVNPDNVTYQAFIFNPSKNRADGAPFEHAFIKDPAAIGIQSTTILDRDGRLWMSNVQIPLGLFGVYRDKAKGTLWRMNFFRTVVDPKTYPQQELGAWSPPDKANFHITPFFGIARFV	207	none	0	cyto 22, extr 4, pero 3	cyto	Cluster04687	D4B3R7|A3106_ARTBC|3e-78	-	-	-	SSF49344||9.81E-14;	-	-	-	-	-	-	-	-	-	-
g2014.t1	Dreco_g2014	MRLLLALISLLSVAVAQFGFFDQMFNAGQQQQQQQQQGGGNSPSDANRYRLQYQGSVCDKYLCPDTLACVHFPHHCPCAWDANEEKFELAEGRRICVSRVGSQSSSTARKLELARKGLI	0.681	17	0.812	17	0.989	11	0.966	0.895	Y	0.45	SignalP-noTM		extr 23, plas 2	FGFFDQMFNAGQQQQQQQQQGGGNSPSDANRYRLQYQGSVCDKYLCPDTLACVHFPHHCPCAWDANEEKFELAEGRRICVSRVGSQSSSTARKLELARKGLI	102	none	0.36	extr 25, cyto 5.5, cyto_nucl 5	extr		C7Z403|LCL2_NECH7|7e-45	-	-	PTHR38425||3.2E-34;PTHR38425:SF1||3.2E-34;	-	-	-	-	-	-	-	-	-	-	-
g2025.t1	Dreco_g2025	MLLQNVICWIGSILGIGNCDSTAAVAVTVDSTVLVIARNDVEAQQATLGLDGYGISYEKLLVPQAGAPLPVLNSSLIQGRYGAIVTINDVSYDVNATWISAITDQQWSQIHSYQSAFNVRMVRLNEYPKAEFGVLPAIANTGCCEDTVDQKISFTNITGFPTANLKANAGVSTRGLWHYPATISQANFTWEIASFEAAGSFTTKTTAAVINSLEGRQQMVWFISWAPEWSATTNYLQHAYIHWMTRGLFSGKRKTHLSAQVDDVQLETGLYKPNGTAFKIRTGDLDAHVTWQRNINARLPTGSSFWLEMGHNGNGDIDDATNTTTGATLCKPAYAVNYDSPPDTALEYKKTPGTGTDLWPAEFEKYGWSLTCARLSPLAAWFTSSANLNAFAHVSHTFS…	0.312	20	0.425	20	0.734	15	0.584	0.511	Y	0.45	SignalP-noTM		extr 25, cyto 1.5, cyto_nucl 1.5	STAAVAVTVDSTVLVIARNDVEAQQATLGLDGYGISYEKLLVPQAGAPLPVLNSSLIQGRYGAIVTINDVSYDVNATWISAITDQQWSQIHSYQSAFNVRMVRLNEYPKAEFGVLPAIANTGCCEDTVDQKISFTNITGFPTANLKANAGVSTRGLWHYPATISQANFTWEIASFEAAGSFTTKTTAAVINSLEGRQQMVWFISWAPEWSATTNYLQHAYIHWMTRGLFSGKRKTHLSAQVDDVQLETGLYKPNGTAFKIRTGDLDAHVTWQRNINARLPTGSSFWLEMGHNGNGDIDDATNTTTGATLCKPAYAVNYDSPPDTALEYKKTPGTGTDLWPAEFEKYGWSLTCARLSPLAAWFTSSANLNAFAHVSHTFSHEELNNATYHDAAREIAFNQ…	676	none	0.15	extr 12, cyto 5, cysk 5, mito 4, cyto_pero 4, plas 2, nucl 2, E.R._mito 2	extr	Cluster05637	-	-	-	-	SSF88713||1.72E-5;	-	-	-	-	-	-	-	-	-	-
g2033.t1	Dreco_g2033	MHASTFLALFPLSLALAAPQRRWVPAPLIVPRSAELVESKYIVKMYSDAKRSAVASAVSKIQADADFTYSRGFKGFAATLQPEELRKLRLNPSVDFIEHDAIISINSNTQQEDATWGLSRISSQQPGGTTYSYDESAGEGTCAYIIDTGVNAKDPDFEGRATFLKNFVEDDDDTDGNGHGTHVAGTIGSKTWGVAKKTKIFGVKVLDAYGSGRTSGVLAGMDFVTKDAVNQTCPKGAVVNMSLGGYKSKLVNDAAAAITNAGLFLAVAAGNDGADAANYSPASEPSACTVGATSKDDKLAKYSNWGKVVDVLAPGSNITSLWINGRSNRTISGTSMASPHVAGIAAYFMGMGQPIAGLCDYIAKNALSGAISNVPNGTVNALINNGFKLE	0.425	18	0.614	18	0.95	15	0.894	0.766	Y	0.45	SignalP-noTM		extr 24, mito 2	PQRRWVPAPLIVPRSAELVESKYIVKMYSDAKRSAVASAVSKIQADADFTYSRGFKGFAATLQPEELRKLRLNPSVDFIEHDAIISINSNTQQEDATWGLSRISSQQPGGTTYSYDESAGEGTCAYIIDTGVNAKDPDFEGRATFLKNFVEDDDDTDGNGHGTHVAGTIGSKTWGVAKKTKIFGVKVLDAYGSGRTSGVLAGMDFVTKDAVNQTCPKGAVVNMSLGGYKSKLVNDAAAAITNAGLFLAVAAGNDGADAANYSPASEPSACTVGATSKDDKLAKYSNWGKVVDVLAPGSNITSLWINGRSNRTISGTSMASPHVAGIAAYFMGMGQPIAGLCDYIAKNALSGAISNVPNGTVNALINNGFKLE	372	none	0.13	mito 26.5, mito_pero 14.5, cyto 3	mito	Cluster00077	P29138|CUDP_METAN|1e-125	2117|PHI:2117|SPM1|P58371|148305|Magnaportheoryzae(related:Magnaporthegrisea)|Reducedvirulence|3e-60	PF05922|Peptidase inhibitor I9|4.4E-7;PF00082|Subtilase family|1.6E-37;	PTHR10795:SF389||4.5E-122;PTHR10795||4.5E-122;	SSF52743||4.32E-70;SSF54897||1.08E-11;	-	-	PS00136|Serine proteases, subtilase family, aspartic acid active site.|-;PS00138|Serine proteases, subtilase family, serine active site.|-;PS00137|Serine proteases, subtilase family, histidine active site.|-;	-	-	-	G3DSA:3.40.50.200||5.4E-73;G3DSA:3.30.70.80||4.5E-17;	-	-	PR00723|Subtilisin serine protease family (S8) signature|4.1E-19;PR00723|Subtilisin serine protease family (S8) signature|4.1E-19;PR00723|Subtilisin serine protease family (S8) signature|4.1E-19;
g2035.t1	Dreco_g2035	MHNGRFVATGLVLAAAAAAAAVTSRSTNACAEVSDSWRQHIDSRREGPPTVRASLAYDCLNSVPLHTTAALELVDSLKPYLEFQSDTAYKADPPPGYPFPAYDVFANLAEVRRKLVAKEYGGEYAFQVDLLETVFEPGHDSHFQFMPDLLAKAVTWIRIGSIVSVSEDGTSPPVIKRHSHVEKSPDTAPIITAINGIDAASFIESIAANGTEWTDVDAGYNSMFFQRSTHSKFGVMGNFAYAFNNIGVKYPGPMTRFTYEGYQESERVANMAVLNENWRYLRDGVAVYDMFCSQKYNPRDIPQKHPYIYTFPSLPAANDSKFPEYPVPEMATSDLIVSGYYLKGDGLEDVAVLSLTTFNSNKPTEFQSVCRDFLEKAAKDGKTKLVIDVQSNIGGLSLQ…	0.225	20	0.448	20	0.959	14	0.905	0.695	Y	0.45	SignalP-noTM		extr 23, golg 4	AVTSRSTNACAEVSDSWRQHIDSRREGPPTVRASLAYDCLNSVPLHTTAALELVDSLKPYLEFQSDTAYKADPPPGYPFPAYDVFANLAEVRRKLVAKEYGGEYAFQVDLLETVFEPGHDSHFQFMPDLLAKAVTWIRIGSIVSVSEDGTSPPVIKRHSHVEKSPDTAPIITAINGIDAASFIESIAANGTEWTDVDAGYNSMFFQRSTHSKFGVMGNFAYAFNNIGVKYPGPMTRFTYEGYQESERVANMAVLNENWRYLRDGVAVYDMFCSQKYNPRDIPQKHPYIYTFPSLPAANDSKFPEYPVPEMATSDLIVSGYYLKGDGLEDVAVLSLTTFNSNKPTEFQSVCRDFLEKAAKDGKTKLVIDVQSNIGGLSLQAIDLLHQVAPDVEEDYYFRN…	809	none	0.15	cyto 20, nucl 9	cyto	Cluster00544	-	-	PF03572|Peptidase family S41|4.3E-7;	PTHR37049:SF2||8.4E-171;PTHR37049||8.4E-171;	SSF52096||1.24E-9;SSF52096||1.24E-9;SSF52096||1.24E-9;	-	-	-	-	-	-	G3DSA:3.90.226.10||1.2E-10;G3DSA:3.90.226.10||1.2E-10;	-	-	-
g2041.t1	Dreco_g2041	MARLWFAFAAVLLLLLPASPVASDPLLTSGAGQRGTIPCWDFKSSASVEEHLAVVSAVGYETASWHHVETSRCTFMGCLLHAGKYRDSALWYSTRLQRFDWGQFLVPWLYRHEFSLAPADGQHFLLETHGITASADLHLNGKALADKEFQAGSFGGHTYDVTSLVAEKNALVAKVYPANLDHDLVQGFVDWNPRAPDNGSGIWRDVVIKQTGSVSMGPLSVSIHLDASAESKVTRAAFVTVRADAHNLDHGELSLVAESVVSCPSGFDDDDMVERRDVTLGPGETKMVEMVHVIASPKIWWPKRWGEQPLYSTTLTFTVNSSLSDRARQRFGIRTVRSHLNRHGDVVFTVNGHAFQVLGAGYSPDHFLRWSRERFEAIANYTIDMGLNTIRLEGTLEHP…	0.854	24	0.906	24	0.993	13	0.962	0.936	Y	0.45	SignalP-noTM		extr 14, plas 7, E.R. 3, golg 2	PLLTSGAGQRGTIPCWDFKSSASVEEHLAVVSAVGYETASWHHVETSRCTFMGCLLHAGKYRDSALWYSTRLQRFDWGQFLVPWLYRHEFSLAPADGQHFLLETHGITASADLHLNGKALADKEFQAGSFGGHTYDVTSLVAEKNALVAKVYPANLDHDLVQGFVDWNPRAPDNGSGIWRDVVIKQTGSVSMGPLSVSIHLDASAESKVTRAAFVTVRADAHNLDHGELSLVAESVVSCPSGFDDDDMVERRDVTLGPGETKMVEMVHVIASPKIWWPKRWGEQPLYSTTLTFTVNSSLSDRARQRFGIRTVRSHLNRHGDVVFTVNGHAFQVLGAGYSPDHFLRWSRERFEAIANYTIDMGLNTIRLEGTLEHPELYDVADEMGIMIIAGWVCCSKWE…	875	none	0.06	nucl 20.5, cyto_nucl 14.5, cyto 7.5	nucl	Cluster02859	C0LRA7|EBDG_HYPVI|0	-	PF02837|Glycosyl hydrolases family 2, sugar binding domain|1.1E-4;PF00703|Glycosyl hydrolases family 2|4.8E-7;	PTHR10066||8.0E-219;PTHR10066:SF66||8.0E-219;	SSF49303||2.24E-15;SSF51445||1.74E-66;SSF49785||5.95E-25;SSF49303||3.53E-24;SSF49303||1.12E-25;	-	-	-	-	-	-	G3DSA:2.60.40.320||6.3E-15;G3DSA:2.60.120.260||6.9E-12;G3DSA:3.20.20.80||1.3E-23;G3DSA:3.20.20.80||1.3E-23;	-	-	-
g2043.t1	Dreco_g2043	MRHSIALALGAGQVAWAVTTFSNTTATTAGPTTTPLPGPFLPPRVGAFRVVGCAGSSTRFPGFERTVTEDKMTLEICAAACPGRYFGVYFMDCYCGDVVDDATTSILADSKCSSRCPGKPEEACGGLTNLLQRREIPQTVLLSLYERIAATTTTEPPSGTTMTRTLTSTGIITTCPPEVTDCPLRRKKPSRKMICYGDYCAQDEYCDECERQRVVCDDDDCHTEACPSGYEKYWTELVVCTGGQDYKYSQCSGDACKRKITCDDGKCTVEKCTDDEFDRKFVCRGDDCEHESCTGDECWKKYQCSADSCKVQPVCPGNGTCTAPGSKTYTTPSSYPVQAGSSRVAIVYNLLAGAALAAFML	0.307	18	0.465	18	0.758	2	0.691	0.587	Y	0.45	SignalP-noTM		extr 10, mito 6, cyto 6, cyto_mito 6	TTFSNTTATTAGPTTTPLPGPFLPPRVGAFRVVGCAGSSTRFPGFERTVTEDKMTLEICAAACPGRYFGVYFMDCYCGDVVDDATTSILADSKCSSRCPGKPEEACGGLTNLLQRREIPQTVLLSLYERIAATTTTEPPSGTTMTRTLTSTGIITTCPPEVTDCPLRRKKPSRKMICYGDYCAQDEYCDECERQRVVCDDDDCHTEACPSGYEKYWTELVVCTGGQDYKYSQCSGDACKRKITCDDGKCTVEKCTDDEFDRKFVCRGDDCEHESCTGDECWKKYQCSADSCKVQPVCPGNGTCTAPGSKTYTTPSSYPVQAGSSRVAIVYNLLAGAALAAFML	343	none	0.45	nucl 8.5, mito 8, cyto_nucl 8, cyto 6.5, E.R. 4, plas 3	nucl	Cluster01519	-	-	PF01822|WSC domain|4.8E-10;	PTHR19297||2.2E-13;	-	-	-	-	PS51212|WSC domain profile.|8.425;PS50287|SRCR domain profile.|7.367;	SM00321|present in yeast cell wall integrity and stress response component proteins|0.0014;	-	-	-	-	-
g2046.t1	Dreco_g2046	MLLGGISLGLAAVPLTLALSTSAGPVNGDGTSNVTHGNFTYNARQFLLNGEPFQIIGGQMDPQRIPKQYWRSRLRMARAMGLNTIFSYIFWNNLEPRRGRWDFDDRNDLVTFFQTVQEEGLFAVLRPGPYICGEHEWGGFPAWLSEIPGMAVRENNGPFLAATKSYLDRLGSELRSQQITRGGPILMTQLENEYGSFGKDKLYLEAHAQLLRANFETPLYTTDGGGKSYLEGGQLHGVLAVADGDPKTAFAARDKYVTDPTSLGPQLNGEYYVHWFDDWHVNVTHNSLDGNQAGQERVVKDLEWVLRGNNSFNIYMFHGGTNFAFDSGSVWAEGRTRAVTTSYDYGAPLDETGRPTKLYHKLRDLISRHVPAGSIPDVPSMPGLARVDEFSLRPLLSLF…	0.656	19	0.78	19	0.96	11	0.928	0.86	Y	0.45	SignalP-noTM		extr 18, plas 4, mito 1, cyto 1, pero 1, E.R. 1, golg 1, cyto_mito 1, cyto_pero 1	STSAGPVNGDGTSNVTHGNFTYNARQFLLNGEPFQIIGGQMDPQRIPKQYWRSRLRMARAMGLNTIFSYIFWNNLEPRRGRWDFDDRNDLVTFFQTVQEEGLFAVLRPGPYICGEHEWGGFPAWLSEIPGMAVRENNGPFLAATKSYLDRLGSELRSQQITRGGPILMTQLENEYGSFGKDKLYLEAHAQLLRANFETPLYTTDGGGKSYLEGGQLHGVLAVADGDPKTAFAARDKYVTDPTSLGPQLNGEYYVHWFDDWHVNVTHNSLDGNQAGQERVVKDLEWVLRGNNSFNIYMFHGGTNFAFDSGSVWAEGRTRAVTTSYDYGAPLDETGRPTKLYHKLRDLISRHVPAGSIPDVPSMPGLARVDEFSLRPLLSLFDARSSTPDKESAEPVTMES…	626	none	0.07	nucl 22.5, cyto_nucl 16, cyto 6.5	nucl	Cluster05643	P48982|BGAL_XANMN|1e-110	-	PF01301|Glycosyl hydrolases family 35|1.0E-87;	PTHR23421:SF13||1.0E-191;PTHR23421||1.0E-191;	SSF49785||9.07E-28;SSF51445||4.38E-78;	-	-	PS01182|Glycosyl hydrolases family 35 putative active site.|-;	-	-	-	G3DSA:3.20.20.80||3.2E-96;G3DSA:2.60.120.260||8.8E-29;	-	PIRSF006336||1.7E-153;	PR00742|Glycosyl hydrolase family 35 signature|4.5E-46;PR00742|Glycosyl hydrolase family 35 signature|4.5E-46;PR00742|Glycosyl hydrolase family 35 signature|4.5E-46;PR00742|Glycosyl hydrolase family 35 signature|4.5E-46;PR00742|Glycosyl hydrolase family 35 signature|4.5E-46;PR00742|Glycosyl hydrolase family 35 signature|4.5E-46;PR00742|Glycosyl hydrolase family 35 signature|4.5E-46;PR00742|Glycos…
g2059.t1	Dreco_g2059	MRIIQTLILVTSAVRVSCLGGRYYRAIQDAVDEELLAFTEMSNLGADPLHLSETSLPFQDELIITESTCWHRRSLFTCTETTFFNRTQLVHISGTTFHAIRHQDQGFSAHYEPSNVHKVPSKIVSKQSTAVMKSTTRGWKIGLKMSHNAKVGQSISLTGEGTYELHEQSTQQKTVTTEVSVEHACPDGYRCTIETLSFYASVRGTCRVQPTTHCADKTRGEQDACLGFNKINKINLACYDSNPAADELTHGARSNEPIFGADGKPLQVPEWDDCSDCDQFHSFARRHCHGRDRHPEEQCEISVPVVKANGMPYTHIIFTRLLLEKYAKKHQDNGKDKMHQDNGKDKREVKEWGEPGRDDKIFVQALRRGDL	0.221	19	0.385	19	0.792	1	0.644	0.525	Y	0.45	SignalP-noTM		extr 9, mito 4, golg 4, E.R. 3, cyto_mito 3, cyto 2, pero 2, vacu 2, cyto_pero 2	GGRYYRAIQDAVDEELLAFTEMSNLGADPLHLSETSLPFQDELIITESTCWHRRSLFTCTETTFFNRTQLVHISGTTFHAIRHQDQGFSAHYEPSNVHKVPSKIVSKQSTAVMKSTTRGWKIGLKMSHNAKVGQSISLTGEGTYELHEQSTQQKTVTTEVSVEHACPDGYRCTIETLSFYASVRGTCRVQPTTHCADKTRGEQDACLGFNKINKINLACYDSNPAADELTHGARSNEPIFGADGKPLQVPEWDDCSDCDQFHSFARRHCHGRDRHPEEQCEISVPVVKANGMPYTHIIFTRLLLEKYAKKHQDNGKDKMHQDNGKDKREVKEWGEPGRDDKIFVQALRRGDL	352	none	0.37	cyto 12.5, cyto_nucl 11, nucl 8.5, mito 6, extr 4	cyto	Cluster01786	-	-	-	-	-	-	-	-	-	-	-	-	-	-	-
g2063.t1	Dreco_g2063	MTMSRRQLLPALLLSLGSITSAASTLAVDQYGSVALVEHLPMDLVCCGSTWSRTTIVRTAIKACETCLPQTQDDQTNKGLHPTRSSRPTASTATAVSTGTNSSTGISSAVPSSSPTSAVSSFVPSTSADSTASASSTTSPTASSTAVSSSITSAPASSSAQTSLPSSTAPATGTGTQPALPYPTRSSYQIKGIYADFWPNMSDIWRSNPGGQSLYLIWADWEPVKKAPPCAGNEQQYDGHCFVIVPEVDEAIRSWSLLGFTTTAIVYGTPAWARGNRPCQFGIYCVPNDAADFGRFAGMLARRYNGLNGHGRMADFVLDREVGNIRYFDIGCGLGPCDQFEWLDLIAENYNAAFDAVAVEQSTARVMTSIDNKFASSFDDAAHGQLSGMTVLMGVANRA…	0.392	23	0.593	23	0.957	15	0.898	0.758	Y	0.45	SignalP-noTM		extr 23, mito 4	STLAVDQYGSVALVEHLPMDLVCCGSTWSRTTIVRTAIKACETCLPQTQDDQTNKGLHPTRSSRPTASTATAVSTGTNSSTGISSAVPSSSPTSAVSSFVPSTSADSTASASSTTSPTASSTAVSSSITSAPASSSAQTSLPSSTAPATGTGTQPALPYPTRSSYQIKGIYADFWPNMSDIWRSNPGGQSLYLIWADWEPVKKAPPCAGNEQQYDGHCFVIVPEVDEAIRSWSLLGFTTTAIVYGTPAWARGNRPCQFGIYCVPNDAADFGRFAGMLARRYNGLNGHGRMADFVLDREVGNIRYFDIGCGLGPCDQFEWLDLIAENYNAAFDAVAVEQSTARVMTSIDNKFASSFDDAAHGQLSGMTVLMGVANRAAGRAWRVSINAYNKPEAAGFSYG…	638	none	0.14	nucl 19, cyto_nucl 16.5, cyto 8, extr 4	nucl	Cluster00814	-	-	-	-	SSF51445||1.1E-5;SSF51445||1.1E-5;	-	-	-	-	-	-	-	-	-	-
g2067.t1	Dreco_g2067	MTPCWLTLALHLGLAASISNANHACHALEKAVPGSVAVPGSAAYLEAGRYWSERQAELRPSCFFIPADTQEVSRGMKVLTGLDTPFSVKSGGHTAFEGGSSSDAGVTIDLVRLNGIVVSEDRRTVSVGPGNRWINVSRTLDPLGLAVVGGRECDVGVGGLVLGGGISYFSGRHGWACDNVGEFEVVLSSGRAVNASASENPDLYRALRGGGGSNWGIVTRFDLVAFEQGALWASSLIFPASSNGTLVSRFRELAVDGLATDPDAHAYMVFMRNPTLGRDVVLASFYHATVPGGGGVPDVFAPFQSVRGALVNTTVVAGVSTLSESIREPYGSRQTWWDTSVRLGAGSARLLEDILPLFEALSEKLRSALGSDDVRTLLVFQPILTNVLRQMQKNGGNAL…	0.364	22	0.541	22	0.937	15	0.803	0.683	Y	0.45	SignalP-noTM		extr 13, cyto 8, cyto_mito 6.833, cyto_nucl 5.333, mito 4.5	HACHALEKAVPGSVAVPGSAAYLEAGRYWSERQAELRPSCFFIPADTQEVSRGMKVLTGLDTPFSVKSGGHTAFEGGSSSDAGVTIDLVRLNGIVVSEDRRTVSVGPGNRWINVSRTLDPLGLAVVGGRECDVGVGGLVLGGGISYFSGRHGWACDNVGEFEVVLSSGRAVNASASENPDLYRALRGGGGSNWGIVTRFDLVAFEQGALWASSLIFPASSNGTLVSRFRELAVDGLATDPDAHAYMVFMRNPTLGRDVVLASFYHATVPGGGGVPDVFAPFQSVRGALVNTTVVAGVSTLSESIREPYGSRQTWWDTSVRLGAGSARLLEDILPLFEALSEKLRSALGSDDVRTLLVFQPILTNVLRQMQKNGGNALGLHPDDGPLMIVQLAIKWDDDL…	478	none	0.01	nucl 19, cyto_nucl 14.5, cyto 8, mito 3	nucl	Cluster07818	D7UQ40|SOL5_ALTSO|1e-43	1046|PHI:1046|CTB5|ABK64182|29003|Cercosporanicotianae|Reducedvirulence|3e-50	PF01565|FAD binding domain|2.1E-23;	PTHR11748||5.1E-153;PTHR11748:SF100||5.1E-153;	SSF56176||5.61E-47;	-	-	-	PS51387|PCMH-type FAD-binding domain profile.|14.686;	-	-	G3DSA:3.30.465.10||8.2E-10;G3DSA:3.30.43.10||4.1E-6;	-	-	-
g2080.t1	Dreco_g2080	MLIAWNLILSVAAARLATPPAGADTSPSKDVPSTPSNGCRSDCVGDVVSMQLSEDRAWFFPKVVDCTVDRATYEAFKPAFTERILKHLPQWSWLQCKSGEIQFSGTASGGGVYEKWSNHCLAKPTFVTFCDQKRCC	0.473	24	0.605	24	0.967	10	0.778	0.698	Y	0.45	SignalP-noTM		extr 21, cyto 3, mito 2, cyto_pero 2	TSPSKDVPSTPSNGCRSDCVGDVVSMQLSEDRAWFFPKVVDCTVDRATYEAFKPAFTERILKHLPQWSWLQCKSGEIQFSGTASGGGVYEKWSNHCLAKPTFVTFCDQKRCC	112	none	0.06	extr 25, nucl 5	extr		-	-	-	-	-	-	-	-	-	-	-	-	-	-	-
g2083.t1	Dreco_g2083	MRIDRHVILSMLAVGGLTSPLASTDASPSEASSDCRSDCVGDVVSVHVFEDRGWFFGTAKDCKVDKVAYEVFQSTVTAKKAMHMMMHWSWLACGRVELEKPVPPEVLLRTCLLRDWHRAPPRQTTAEAAQQARTISSTPAGPRGRPRHRQECRPQEGSGANGATTATAHNISPRTKDQERDGAMEDRRDHATLAQQVGGNLLRGAVDDIPR	0.237	27	0.37	27	0.758	11	0.598	0.493	Y	0.45	SignalP-noTM		extr 12, mito 8, cyto 6	PSEASSDCRSDCVGDVVSVHVFEDRGWFFGTAKDCKVDKVAYEVFQSTVTAKKAMHMMMHWSWLACGRVELEKPVPPEVLLRTCLLRDWHRAPPRQTTAEAAQQARTISSTPAGPRGRPRHRQECRPQEGSGANGATTATAHNISPRTKDQERDGAMEDRRDHATLAQQVGGNLLRGAVDDIPR	184	none	0.26	extr 24, cyto_nucl 4.5, cyto 4, nucl 3	extr		-	-	-	-	-	-	-	-	-	-	-	-	-	-	-
g2085.t1	Dreco_g2085	MKSIAVLSALLAGVSAVAVPGAPTTVSYEGYKVFRVQVGTKSQHVNDVIAKLGLSTWQPPSRKGAFADIEVPPSKLAAFRREMKGMDMVAMHEDLGSSIADEGAFQTYVEGSLNGTWFNSYHAYSDHLQFLRDLQASHASNSEIVTSGNSLQGNAITGIHFWGSSGKANKPAIVLHGNVHAREWITSMVVEFFANALLDGLKSGGEIQALVDKYDFYFFPIVNPDGFLYSQTSDRLWRKNRQKSSGSSCVGHDINRNWPYMWGKPGASSNPCAQDYRGMGQGDAPETKALSDFLLKVKKSQGLKLYIDYHSYSQLFMTPYGYTCDELPANNDELQSLASGAVEAIKSVHGLSFEYGPICTTIYRASGSSVDYVAEVVKADYSFTSELRDKGRYGFILPA…	0.65	17	0.776	17	0.958	11	0.932	0.86	Y	0.45	SignalP-noTM		extr 26	AVPGAPTTVSYEGYKVFRVQVGTKSQHVNDVIAKLGLSTWQPPSRKGAFADIEVPPSKLAAFRREMKGMDMVAMHEDLGSSIADEGAFQTYVEGSLNGTWFNSYHAYSDHLQFLRDLQASHASNSEIVTSGNSLQGNAITGIHFWGSSGKANKPAIVLHGNVHAREWITSMVVEFFANALLDGLKSGGEIQALVDKYDFYFFPIVNPDGFLYSQTSDRLWRKNRQKSSGSSCVGHDINRNWPYMWGKPGASSNPCAQDYRGMGQGDAPETKALSDFLLKVKKSQGLKLYIDYHSYSQLFMTPYGYTCDELPANNDELQSLASGAVEAIKSVHGLSFEYGPICTTIYRASGSSVDYVAEVVKADYSFTSELRDKGRYGFILPANQIVPAGEEALAGFKYL…	404	none	0.1	cyto 17.5, cyto_nucl 14.5, nucl 10.5	cyto	Cluster02911	C5FH26|MCPAL_ARTOC|1e-154	-	PF00246|Zinc carboxypeptidase|1.3E-80;PF02244|Carboxypeptidase activation peptide|3.8E-7;	PTHR11705||5.0E-224;PTHR11705:SF11||5.0E-224;	SSF53187||2.78E-98;SSF54897||3.83E-15;	-	-	PS00132|Zinc carboxypeptidases, zinc-binding region 1 signature.|-;	-	SM00631||1.2E-108;	-	G3DSA:3.40.630.10||1.2E-102;G3DSA:3.30.70.340||4.4E-13;	-	-	PR00765|Carboxypeptidase A metalloprotease (M14) family signature|1.1E-9;PR00765|Carboxypeptidase A metalloprotease (M14) family signature|1.1E-9;PR00765|Carboxypeptidase A metalloprotease (M14) family signature|1.1E-9;PR00765|Carboxypeptidase A metalloprotease (M14) family signature|1.1E-9;
g2093.t1	Dreco_g2093	MAIGFPLLLLVVLASVAAAVVHPPVHPPTSLPPPPPLPPVASTAAAKVSRPAPPAPPAVSGAPTGRPSCECGYTYCASVLLGMRTPWNPKQLSDAYCKTAGAVCSNGAPGSDVETALYLCLCDNADQRAGDRLHLLCGCDECLVEPPDYRGRCATPCHAGACK	0.694	19	0.82	19	0.989	11	0.971	0.902	Y	0.45	SignalP-noTM		extr 27	VVHPPVHPPTSLPPPPPLPPVASTAAAKVSRPAPPAPPAVSGAPTGRPSCECGYTYCASVLLGMRTPWNPKQLSDAYCKTAGAVCSNGAPGSDVETALYLCLCDNADQRAGDRLHLLCGCDECLVEPPDYRGRCATPCHAGACK	144	none	0.1	extr 10, mito 10, cyto 7, mito_nucl 7	extr	Cluster09995	-	-	-	-	-	-	-	-	-	-	-	-	-	-	-
g2118.t1	Dreco_g2118	MRVIATVLLLGASALAAPNPVDGVRAPGGAVERPEMTVFRRSNNTTVCRKSEVFKIKAAMADCKKLAEDGKKAAKKGHDGLLKQFFKDDSPSTRIHVADVLEQVLRHCGDESRLPTDSCHGDFCSDHDDASAIDLGVPKIYFCDAFFADDSAGCRDMSRGATVVAQAARAVNKDVRVVTRGYQGSLGLTRSDALANAESYALFATAVSPRCIDESRTFLDKVSGAMTWLFNVKEQYFGVRKIYVPQENEGN	0.564	17	0.712	17	0.943	10	0.9	0.813	Y	0.45	SignalP-noTM		extr 22, pero 2, E.R. 2	PNPVDGVRAPGGAVERPEMTVFRRSNNTTVCRKSEVFKIKAAMADCKKLAEDGKKAAKKGHDGLLKQFFKDDSPSTRIHVADVLEQVLRHCGDESRLPTDSCHGDFCSDHDDASAIDLGVPKIYFCDAFFADDSAGCRDMSRGATVVAQAARAVNKDVRVVTRGYQGSLGLTRSDALANAESYALFATAVSPRCIDESRTFLDKVSGAMTWLFNVKEQYFGVRKIYVPQENEGN	234	none	0.04	extr 19, cyto 6.5, mito 5, cyto_nucl 4	extr		A1CIU4|NPIIA_ASPCL|4e-06	-	PF02102|Deuterolysin metalloprotease (M35) family|5.3E-11;	PTHR37016||5.7E-12;	SSF55486||2.42E-19;	-	-	-	-	-	-	G3DSA:3.40.390.10||1.0E-22;	-	-	PR00768|Deuterolysin metalloprotease (M35) family signature|2.4E-7;PR00768|Deuterolysin metalloprotease (M35) family signature|2.4E-7;
g2131.t1	Dreco_g2131	MHLSALFLAALPALALGQDPSSSSSSTLYSMQTSTMIMTKTVTLVRAHTVTASLNSTTAGFATGTIGSTAYHSFKTESPILAPSTVPSKGPTSAAVALDASKMALAAVAGIVAVAAVM	0.836	18	0.873	18	0.952	1	0.9	0.888	Y	0.45	SignalP-noTM		extr 17, plas 5, vacu 3	DPSSSSSSTLYSMQTSTMIMTKTVTLVRAHTVTASLNSTTAGFATGTIGSTAYHSFKTESPILAPSTVPSKGPTSAAVALDASKMALAAVAGIVAVAAVM	100	none	0.02	extr 14, mito 14, plas 2	extr		-	-	-	-	-	-	-	-	-	-	-	-	-	-	-
g2151.t1	Dreco_g2151	MVRTLLLLATALAAEATTTIMTASVFFPEKRTHPDPCLGSIVGVASDVTSIDIRCYLAGTSVTEFGVETWSIAQGPSTWAMSGNVATSSPDEMNCRLDAAKDVAHCQMFDRHSRFLESGTVTTTDVDGYKTSMWPVAITGGLEKLGAPTASATSDGASATTSSSASASSASASPTATSTTASTTASTTSASTMTASTMTTSTTSVSTVKTSTTSANTTATSPTAKVANAAGSLVTPFMLHAGLAVIVGGALVI	0.4	17	0.605	17	0.955	11	0.905	0.767	Y	0.45	SignalP-noTM		extr 20, plas 4, mito 3	TTIMTASVFFPEKRTHPDPCLGSIVGVASDVTSIDIRCYLAGTSVTEFGVETWSIAQGPSTWAMSGNVATSSPDEMNCRLDAAKDVAHCQMFDRHSRFLESGTVTTTDVDGYKTSMWPVAITGGLEKLGAPTASATSDGASATTSSSASASSASASPTATSTTASTTASTTSASTMTASTMTTSTTSVSTVKTSTTSANTTATSPTAKVANAAGSLVTPFMLHAGLAVIVGGALVI	236	none	0.14	extr 15, plas 7, mito 3.5, cysk_plas 3.5, E.R._mito 2.5	extr		-	-	-	-	-	-	-	-	-	-	-	-	-	-	-
g2152.t1	Dreco_g2152	MRYAFAAAAIALATPALAAVAQEDCAKHCEMERKNCLETPFSTTKRCSLMHENCRKVNGCPSVVGRRAAPVIQLDNDDEASPAVGATPTVRRDKCASDCLEAKYKCLSKDGSNKSTCISDFVGCIGYNPYSQDPVVDPTACASKTPSSTAVPTATAKATPEQYRCAEKCTADKAKCLELFSPNLSTCANTFVACLGHNIYDEASAEPVACTEEAVKKMHAHEHDGECKGEACAGKSSSGSPATSTATSISTATKCAGCAPAPTAAPTKSSAPTKSSAPTKSSVHNGHPVPPTPVGTGAPANRCLPACEDAKAKCLATNKSSCPGDFEDCKAKCPASNGGLPPIVAGAGRHAAPAVGLLALAGAALFL	0.363	19	0.558	19	0.894	18	0.851	0.716	Y	0.45	SignalP-noTM		extr 18, cyto 2, plas 2, pero 2, cyto_pero 2	VAQEDCAKHCEMERKNCLETPFSTTKRCSLMHENCRKVNGCPSVVGRRAAPVIQLDNDDEASPAVGATPTVRRDKCASDCLEAKYKCLSKDGSNKSTCISDFVGCIGYNPYSQDPVVDPTACASKTPSSTAVPTATAKATPEQYRCAEKCTADKAKCLELFSPNLSTCANTFVACLGHNIYDEASAEPVACTEEAVKKMHAHEHDGECKGEACAGKSSSGSPATSTATSISTATKCAGCAPAPTAAPTKSSAPTKSSAPTKSSVHNGHPVPPTPVGTGAPANRCLPACEDAKAKCLATNKSSCPGDFEDCKAKCPASNGGLPPIVAGAGRHAAPAVGLLALAGAALFL	348	none	0.19	plas 19, cyto 6, nucl 3, mito 3, cyto_golg 3, mito_nucl 3	plas		-	-	-	-	-	-	-	-	-	-	-	-	-	-	-
g2153.t1	Dreco_g2153	MKASLLLPVSGALLASAARLHPRHIAYVTEVETKTVTEWYGVTSTPKPEAEPKQLANNNVIENTPAQVPAQAPAQAPAQQAAPSDNDLQDVTQDPPQAKVYQPEPQVSSPQQPQPSTSNAGQNSGSISDSRLQDFTNYQNSILDHHNIHRLNHSAPLLSWDDTLAQYASQTAHTCVWKHDQTLGGGGYGQNLASWGSTENIDNDATKIRTAASAVTNQWYNKELPLYHYYQAEDPTNEPDFFQWGHFTQMVWKKTTKVGCASVLCRAGTVLSYPAWYTVCNYDPQGNMAGEFVQNVSPALGKSAVSI	0.203	18	0.376	18	0.788	11	0.685	0.542	Y	0.45	SignalP-noTM		extr 25	RLHPRHIAYVTEVETKTVTEWYGVTSTPKPEAEPKQLANNNVIENTPAQVPAQAPAQAPAQQAAPSDNDLQDVTQDPPQAKVYQPEPQVSSPQQPQPSTSNAGQNSGSISDSRLQDFTNYQNSILDHHNIHRLNHSAPLLSWDDTLAQYASQTAHTCVWKHDQTLGGGGYGQNLASWGSTENIDNDATKIRTAASAVTNQWYNKELPLYHYYQAEDPTNEPDFFQWGHFTQMVWKKTTKVGCASVLCRAGTVLSYPAWYTVCNYDPQGNMAGEFVQNVSPALGKSAVSI	289	none	0.29	nucl 13.5, cyto_nucl 11.5, cyto 6.5, mito 6, extr 4, mito_pero 4	nucl	Cluster02807	D4B327|PRY1_ARTBC|1e-34	184|PHI:184|RBT4|AAG09789|5476|Candidaalbicans|Reducedvirulence|1e-16	PF00188|Cysteine-rich secretory protein family|7.4E-23;	PTHR10334||1.2E-59;PTHR10334:SF230||1.2E-59;PTHR10334||1.2E-59;PTHR10334:SF230||1.2E-59;	SSF55797||5.49E-41;	-	-	PS01009|CRISP family signature 1.|-;	-	SM00198|SCP / Tpx-1 / Ag5 / PR-1 / Sc7 family of extracellular domains.|2.9E-33;	-	G3DSA:3.40.33.10||1.2E-42;	-	-	PR00837|Allergen V5/Tpx-1 family signature|8.2E-13;PR00837|Allergen V5/Tpx-1 family signature|8.2E-13;PR00837|Allergen V5/Tpx-1 family signature|8.2E-13;PR00838|Venom allergen 5 signature|4.2E-6;PR00838|Venom allergen 5 signature|4.2E-6;
g2159.t1	Dreco_g2159	MARRAFAALLWAAGVVQALPAPGAPPVYSNGSEHPTQTPAAQTIHLPIAAEAVLAPSNASESVDGLAAPTHSNSAEQWNRTSEQNTHLPLAAEAGLVKSNGSKTVDGPATHWNSSGYWNQTLAQNLHLPLPAGKGHAKYNGSNPDDGPTRPPQPTPTPPAQAKANFTRNGPMKILAPSVHWSVDRSNSAHLKPSPPGEGLEMFYGNNDPLVAGHFAFVNFMFKSAAVFLDNSAFLEAVFDKWGALVINFLSRKAFDLAQGSWTIPDGEHLILVGFIQGCGDFHLQERCYFKASNIVFDAARRVVRAVGNPSHPDEIVSEGKTRWGLWIPDASPPHQAHRRSQPESTSVGGFPFQVGAASSKAGGLSARATEAGETGSSFNASACVPPVDSTYNLPTACL…	0.731	19	0.818	19	0.947	12	0.914	0.87	Y	0.45	SignalP-noTM		extr 21, mito 3, nucl 1, plas 1, vacu 1	PAPGAPPVYSNGSEHPTQTPAAQTIHLPIAAEAVLAPSNASESVDGLAAPTHSNSAEQWNRTSEQNTHLPLAAEAGLVKSNGSKTVDGPATHWNSSGYWNQTLAQNLHLPLPAGKGHAKYNGSNPDDGPTRPPQPTPTPPAQAKANFTRNGPMKILAPSVHWSVDRSNSAHLKPSPPGEGLEMFYGNNDPLVAGHFAFVNFMFKSAAVFLDNSAFLEAVFDKWGALVINFLSRKAFDLAQGSWTIPDGEHLILVGFIQGCGDFHLQERCYFKASNIVFDAARRVVRAVGNPSHPDEIVSEGKTRWGLWIPDASPPHQAHRRSQPESTSVGGFPFQVGAASSKAGGLSARATEAGETGSSFNASACVPPVDSTYNLPTACLGEYFDEALDRQLGAEDMTA…	1050	818 - EPKKKKKARPK - 828	0.38	nucl 22.5, cyto_nucl 16, cyto 8.5	nucl	Cluster02119	-	-	-	-	-	-	-	-	-	-	-	-	-	-	-
g2184.t1	Dreco_g2184	MKVAGAIVLATCALAAGTANPFDASLDDIWRQTKRLAFKTEPPFNSSRFDSESRALAEAVIDGITNLELHSHAPADRDFVDRLARILGSLNYLHDRLDGVKSDVVQARACEGVHGVLAYLGEVFLHLTREIVATVPDHGLGGEVEVETGAMMQVLGDVRSDFSEDNCHAEANDDGSAAT	0.303	20	0.475	20	0.879	15	0.734	0.615	Y	0.45	SignalP-noTM		extr 20, E.R. 3, cyto 2	PFDASLDDIWRQTKRLAFKTEPPFNSSRFDSESRALAEAVIDGITNLELHSHAPADRDFVDRLARILGSLNYLHDRLDGVKSDVVQARACEGVHGVLAYLGEVFLHLTREIVATVPDHGLGGEVEVETGAMMQVLGDVRSDFSEDNCHAEANDDGSAAT	159	none	0.03	cyto_nucl 17.5, cyto 14, nucl 13, extr 5	cyto_nucl		-	-	-	-	-	-	-	-	-	-	-	-	-	-	-
g2186.t1	Dreco_g2186	MAPILIALLLVGSAVAHMGYSLSYIDENVKKCMDDSKAQKWWTIDHFEFSASVDSYNAPDASARFKSSRTAGFVNFTLTHPSVPQKAYCTENISENLPSYSRKTFDDFTRGRTIHSCSIPAGGGSMASFSINAASGELHITHRWNCPDKSNWFDKSFEATGTAKLRCSSSRTKVRQQRKQGEADDSSRSIRCEPTTLQVPIRQLEHRNGPWKKGTIYFL	0.635	17	0.766	17	0.949	12	0.916	0.847	Y	0.45	SignalP-noTM		extr 16, plas 4, golg 3, E.R. 2	MGYSLSYIDENVKKCMDDSKAQKWWTIDHFEFSASVDSYNAPDASARFKSSRTAGFVNFTLTHPSVPQKAYCTENISENLPSYSRKTFDDFTRGRTIHSCSIPAGGGSMASFSINAASGELHITHRWNCPDKSNWFDKSFEATGTAKLRCSSSRTKVRQQRKQGEADDSSRSIRCEPTTLQVPIRQLEHRNGPWKKGTIYFL	202	none	0.48	cyto 13, extr 9, cyto_mito 9	cyto		-	-	PF16541|Alternaria alternata allergen 1|3.7E-7;	-	-	-	-	-	-	-	-	-	-	-	-
g2195.t1	Dreco_g2195	MPSTLLLVGAVLARLAAAATCVEKTQVPPEGWRRLSEAPDGTRPLQMSIALRLPRVDGLASTLASSSSKHLSLDEVTSMRAADGEDCDAVLRWLADEGITDSKADEGWVHVRTTAARAEALLGMRLRSYSFRGNAPVLRTTDYSVPDHLAEAITFVHPISNFMTPAHKVAASRPVTRRSLTGAVEICGLTTTPACIARRYGLNYTTPDGKSSVRLGVAGFLEQYANFADTQSFLLETKPELAGRNFSVELVNGGRNPQDAAEAGAEANLDVQYAMAVGYPAAVTYYSTHGRGVKLDDEGNALPKERDDNEPYLGLFEYLLAKPDDELPSVLSVSYADDELSVPKPYAGRVCDLAGLLAARGMSIVVGSGDGGAKGGRNSTCRTNDGSARDVAMATFPAT…	0.6	19	0.748	19	0.963	12	0.933	0.848	Y	0.45	SignalP-noTM		extr 18, mito 3, cyto 3, cyto_mito 3	TCVEKTQVPPEGWRRLSEAPDGTRPLQMSIALRLPRVDGLASTLASSSSKHLSLDEVTSMRAADGEDCDAVLRWLADEGITDSKADEGWVHVRTTAARAEALLGMRLRSYSFRGNAPVLRTTDYSVPDHLAEAITFVHPISNFMTPAHKVAASRPVTRRSLTGAVEICGLTTTPACIARRYGLNYTTPDGKSSVRLGVAGFLEQYANFADTQSFLLETKPELAGRNFSVELVNGGRNPQDAAEAGAEANLDVQYAMAVGYPAAVTYYSTHGRGVKLDDEGNALPKERDDNEPYLGLFEYLLAKPDDELPSVLSVSYADDELSVPKPYAGRVCDLAGLLAARGMSIVVGSGDGGAKGGRNSTCRTNDGSARDVAMATFPATCPWVTAVGAVTHGHDPPRG…	559	none	0.05	cyto_nucl 13.5, cyto 13, nucl 12, pero 4	cyto_nucl	Cluster05203	Q70J59|SED2_ASPFU|1e-102	-	PF00082|Subtilase family|1.2E-8;PF09286|Pro-kumamolisin, activation domain|1.6E-23;	PTHR14218:SF9||4.0E-172;PTHR14218||4.0E-172;	SSF54897||7.14E-23;SSF52743||2.88E-58;	-	-	PS00138|Serine proteases, subtilase family, serine active site.|-;	PS51695|Sedolisin domain profile.|29.921;	SM00944|Pro-kumamolisin, activation domain|1.4E-31;	-	G3DSA:3.40.50.200||8.1E-93;	-	-	-
g2198.t1	Dreco_g2198	MQSHILVPIFVVAFLAVFTAASGIEKRSFTVHRVGNPNFSGHNGPRSLAKSYRKFGAPLPKGLAGALAAQNTRKRTLDTAPLGSVAGKKCWAGTAQSSMARQQANKTRQVGSVEAVPEQNDIEFLSPISIGGQAVNLAFDTGSSDLWVFSKQLNPAATTGHRVYDPAKSTSFSMIQGQNFSIRYGDGSAATGVVGTDVVNVGGAEFQAQPIELATAVTRTFVEDQNNDGLMGLAFSNLNTVKPQRQKTFFENVRATLSEPLFTADLRNNSTGAYTFGVIDASKFNGSLTWIPVNTTRGFWQFSSERFAVGGEPSQNASSGGQAIADTGTTLILADPNIVQGYYSRVPGARNSDNAGGVTVPCNAKLPDLDLDIGGLYMARVSGANINFAPVGNGSCFGG…	0.559	22	0.712	22	0.961	4	0.908	0.818	Y	0.45	SignalP-noTM		extr 23, mito 2, cyto 2, cyto_mito 2	GIEKRSFTVHRVGNPNFSGHNGPRSLAKSYRKFGAPLPKGLAGALAAQNTRKRTLDTAPLGSVAGKKCWAGTAQSSMARQQANKTRQVGSVEAVPEQNDIEFLSPISIGGQAVNLAFDTGSSDLWVFSKQLNPAATTGHRVYDPAKSTSFSMIQGQNFSIRYGDGSAATGVVGTDVVNVGGAEFQAQPIELATAVTRTFVEDQNNDGLMGLAFSNLNTVKPQRQKTFFENVRATLSEPLFTADLRNNSTGAYTFGVIDASKFNGSLTWIPVNTTRGFWQFSSERFAVGGEPSQNASSGGQAIADTGTTLILADPNIVQGYYSRVPGARNSDNAGGVTVPCNAKLPDLDLDIGGLYMARVSGANINFAPVGNGSCFGGLQASPLGTMGIYGDIFFKSQFV…	414	none	0.29	nucl 11, mito 10, cyto_nucl 10	nucl	Cluster06125	Q4WZS3|Y5950_ASPFU|1e-92	697|PHI:697|ugt51E1|AAM81358|5022|Leptosphaeriamaculans|Unaffectedpathogenicity|2e-24	PF00026|Eukaryotic aspartyl protease|1.4E-67;	PTHR13683:SF328||2.5E-146;PTHR13683:SF328||2.5E-146;PTHR13683||2.5E-146;PTHR13683||2.5E-146;	SSF50630||8.02E-86;	-	-	PS00141|Eukaryotic and viral aspartyl proteases active site.|-;PS00141|Eukaryotic and viral aspartyl proteases active site.|-;	-	-	-	G3DSA:2.40.70.10||4.8E-38;G3DSA:2.40.70.10||4.2E-43;	-	-	PR00792|Pepsin (A1) aspartic protease family signature|1.5E-16;PR00792|Pepsin (A1) aspartic protease family signature|1.5E-16;PR00792|Pepsin (A1) aspartic protease family signature|1.5E-16;PR00792|Pepsin (A1) aspartic protease family signature|1.5E-16;
g2212.t1	Dreco_g2212	MVSAASLVGLLLVPAVLGSHSSSKRGLCFTPNIHHPEDNKLWSQSGSALKWYYNYQSLPSPAYSSLSQDEFEFIPMMWGIGQNSNDTAFYDAVRKLVDDGTSIKHVFGFNEPDGPRAQGGSDVTPRDAAQAWVANFEPLGKMGIKLGLPACTGGWGGLPWLTQFLANCSELVSAGGERKNCTWHFLPVHWYDNFEGLASHIGERRAAFPGAEIWVTEYAYAHRDLAATQEFYNQSIDYFDKLDYIGRYSYFGAFRANKANVGPNAAFLNKGGQLTDIGSWYLGFRATGVKPESGPASMAVPNLAFAGVGLVTGLIASWL	0.656	19	0.75	19	0.897	3	0.851	0.804	Y	0.45	SignalP-noTM		extr 17, plas 9	HSSSKRGLCFTPNIHHPEDNKLWSQSGSALKWYYNYQSLPSPAYSSLSQDEFEFIPMMWGIGQNSNDTAFYDAVRKLVDDGTSIKHVFGFNEPDGPRAQGGSDVTPRDAAQAWVANFEPLGKMGIKLGLPACTGGWGGLPWLTQFLANCSELVSAGGERKNCTWHFLPVHWYDNFEGLASHIGERRAAFPGAEIWVTEYAYAHRDLAATQEFYNQSIDYFDKLDYIGRYSYFGAFRANKANVGPNAAFLNKGGQLTDIGSWYLGFRATGVKPESGPASMAVPNLAFAGVGLVTGLIASWL	300	none	0.05	plas 11.5, mito 9, extr_plas 6.5, cyto_mito 6.5, E.R. 6	plas	Cluster05993	Q09788|ASL1_SCHPO|6e-12	-	PF11790|Glycosyl hydrolase catalytic core|3.1E-71;	PTHR34154:SF2||1.5E-115;PTHR34154||1.5E-115;	SSF51445||4.9E-22;	-	-	-	-	-	-	-	-	-	-
g2240.t1	Dreco_g2240	MLPTIATATALVLGLASPALGQNPYAITGVSVPRGWTPQLREDINDLQRAGGPKWDLYVQALSAMQESNAVDPLSYFQISGIHGMPYTQWNNTGAGIQGNSWMGYCPHGEDLFLPWHRPYVVLFEQSLVEAARRIALRYPAQDQPRYRAAAEQLRSPYWDWATDSRVPPVTTQQQLTINVTVNGAVQARSVRNPLWSYQMPQQALNGQFGTFDRRPNTIRCVGNGIRYPDTADMRLASRQFKSWSYDALTRARSFADFTSGASIGLENIHNAVHVDAACGNQFGNPNVAAFDPLFMLHHTNVDRLWAYWQAMNPSQDMFQNSYRGGARFSTPGGTTITSRSPLQPFYGNDRVVHTSESVRSIRSFNYAYRGLEYWNTNAEQMRQNAVRLINQMYGPVRS…	0.753	22	0.761	22	0.852	1	0.765	0.763	Y	0.45	SignalP-noTM		extr 16, mito 4, nucl 3, plas 3	NPYAITGVSVPRGWTPQLREDINDLQRAGGPKWDLYVQALSAMQESNAVDPLSYFQISGIHGMPYTQWNNTGAGIQGNSWMGYCPHGEDLFLPWHRPYVVLFEQSLVEAARRIALRYPAQDQPRYRAAAEQLRSPYWDWATDSRVPPVTTQQQLTINVTVNGAVQARSVRNPLWSYQMPQQALNGQFGTFDRRPNTIRCVGNGIRYPDTADMRLASRQFKSWSYDALTRARSFADFTSGASIGLENIHNAVHVDAACGNQFGNPNVAAFDPLFMLHHTNVDRLWAYWQAMNPSQDMFQNSYRGGARFSTPGGTTITSRSPLQPFYGNDRVVHTSESVRSIRSFNYAYRGLEYWNTNAEQMRQNAVRLINQMYGPVRSPPPMSGPPGPPGGPPGSVPVIE…	532	none	0.47	nucl 14.5, cyto_nucl 11, cyto 6.5, extr 4, mito 3, cysk 3	nucl	Cluster00059	A7BHQ9|TYRO_PHONA|1e-51	-	PF00264|Common central domain of tyrosinase|2.7E-45;	PTHR11474||2.6E-52;PTHR11474:SF18||2.6E-52;PTHR11474:SF18||2.6E-52;PTHR11474||2.6E-52;	SSF48056||9.16E-53;	-	-	PS00497|Tyrosinase CuA-binding region signature.|-;PS00498|Tyrosinase and hemocyanins CuB-binding region signature.|-;	-	-	-	G3DSA:1.10.1280.10||2.6E-65;	-	-	PR00092|Tyrosinase copper-binding domain signature|8.8E-13;PR00092|Tyrosinase copper-binding domain signature|8.8E-13;PR00092|Tyrosinase copper-binding domain signature|8.8E-13;PR00092|Tyrosinase copper-binding domain signature|8.8E-13;
g2290.t1	Dreco_g2290	MKLSTALGLVVAPLAAARQARTGFSPANPVSRLKGVAELNPRKITVIENATKNAISVDSKAEVIIIWANPGNGADTTSLNSAVNAAQSATAVEGKTGTAPAKGSATHTVKVGGPGGLTYQPDQLQNVPVGDMVVFEFLSQNHTVTQSPFDTPCKALPGGMDSGYQPNPNNSVSPPPQVAMQIMTSAPLWFYCRQKGHCGKGMVFSINPTEAKSQAIFQQMAIAQNGTGQASPITGGSTANNPAQRPAGSEMPAAGVAQPTGSLGSGGGEMSPGRGTLNADGSCDCVASCSFGSFPAQNQGLGSIGGMGGSLPMNMAARR	0.167	23	0.337	18	0.87	15	0.687	0.526	Y	0.45	SignalP-noTM		extr 24, mito 2.5	FSPANPVSRLKGVAELNPRKITVIENATKNAISVDSKAEVIIIWANPGNGADTTSLNSAVNAAQSATAVEGKTGTAPAKGSATHTVKVGGPGGLTYQPDQLQNVPVGDMVVFEFLSQNHTVTQSPFDTPCKALPGGMDSGYQPNPNNSVSPPPQVAMQIMTSAPLWFYCRQKGHCGKGMVFSINPTEAKSQAIFQQMAIAQNGTGQASPITGGSTANNPAQRPAGSEMPAAGVAQPTGSLGSGGGEMSPGRGTLNADGSCDCVASCSFGSFPAQNQGLGSIGGMGGSLPMNMAARR	296	none	0.14	nucl 14.5, cyto_nucl 13.8333, cyto 10, cyto_pero 6, extr 4	nucl	Cluster04266	P0DN32|CUPR1_ARTBC|6e-13	-	-	PTHR34883||3.9E-74;PTHR34883:SF4||3.9E-74;	SSF49503||2.79E-18;	-	-	-	-	-	-	G3DSA:2.60.40.420||1.3E-15;	-	-	-
g2307.t1	Dreco_g2307	MRLLTGIVALGLLPHRGTPSTLSEDLSYSINALNQARQAKRLASLSWDPNLAAYAQYWANAMATGQQPFAHATGRYRPSQGENLYARASGQCDGAYDTPMLTAMHAWFAQASLYNDEPVRTGHEHWLHWSQCMWSTTTHVGCARAYSISEPYKVYNVCRFFPAGNIVGQKPF	0.325	20	0.407	20	0.651	2	0.489	0.451	Y	0.45	SignalP-noTM		extr 16, mito 6, nucl 4	TLSEDLSYSINALNQARQAKRLASLSWDPNLAAYAQYWANAMATGQQPFAHATGRYRPSQGENLYARASGQCDGAYDTPMLTAMHAWFAQASLYNDEPVRTGHEHWLHWSQCMWSTTTHVGCARAYSISEPYKVYNVCRFFPAGNIVGQKPF	152	none	0.17	extr 14, nucl 10.5, cyto_nucl 9, cyto 6.5	extr	Cluster11151	A9YME1|VA5_MICHY|7e-08	184|PHI:184|RBT4|AAG09789|5476|Candidaalbicans|Reducedvirulence|5e-10	PF00188|Cysteine-rich secretory protein family|1.7E-19;	PTHR10334||1.8E-23;	SSF55797||1.96E-30;	-	-	-	-	SM00198|SCP / Tpx-1 / Ag5 / PR-1 / Sc7 family of extracellular domains.|1.0E-17;	-	G3DSA:3.40.33.10||1.0E-28;	-	-	PR00837|Allergen V5/Tpx-1 family signature|1.4E-10;PR00837|Allergen V5/Tpx-1 family signature|1.4E-10;PR00837|Allergen V5/Tpx-1 family signature|1.4E-10;PR00837|Allergen V5/Tpx-1 family signature|1.4E-10;
g2318.t1	Dreco_g2318	MGQRWIALCSLLSLALAKVPIRDCYLGSPPYCNNSLAADPTCRGLEVTTADGWKRMDCDYVIYNIPATARQTRKWIVIHAGACDTYTEFLGDYFAPTLGLNIFGLRPCGGFEDSLCAARHDYDSCIALHASWFMPHPLGTSPEITLHGLGFNPPALVDIYHTPDTNMLFLHEYGDTSASYDWFSADGCNATSKPLYMCVAAIDPNFASKFSAIKSILEGAFTDTPGFPCKLEVVDAMPYAQDADAAIPCTGILREYNDPVKFGADPSGAPNWAWEMPPFMTRAIQLATEVEPDGTMVNAFSRAINIALCKKFDDAHATNCYDDDMLT	0.705	18	0.807	18	0.968	15	0.93	0.874	Y	0.45	SignalP-noTM		extr 17, E.R. 4, mito 2, golg 2	VPIRDCYLGSPPYCNNSLAADPTCRGLEVTTADGWKRMDCDYVIYNIPATARQTRKWIVIHAGACDTYTEFLGDYFAPTLGLNIFGLRPCGGFEDSLCAARHDYDSCIALHASWFMPHPLGTSPEITLHGLGFNPPALVDIYHTPDTNMLFLHEYGDTSASYDWFSADGCNATSKPLYMCVAAIDPNFASKFSAIKSILEGAFTDTPGFPCKLEVVDAMPYAQDADAAIPCTGILREYNDPVKFGADPSGAPNWAWEMPPFMTRAIQLATEVEPDGTMVNAFSRAINIALCKKFDDAHATNCYDDDMLT	309	none	0.08	extr 17, cyto 9.5, cyto_nucl 9, nucl 5.5	extr	Cluster14462	-	-	-	-	-	-	-	-	-	-	-	-	-	-	-
g2327.t1	Dreco_g2327	MSIVATLVAGLLLTAVPTAAVAIGDADFSLIGDATVGSVRHHDDVDMLPCYVEEPCPELVRFHEAMAANEHLARRSLSNSTVDGQDEGGLVSIDVYLNIIAPSADEVRPTEEYILKMAGWLQDFYRPFGFLFVPRLPVRTIFNRKWGKGWSKMEMISELHQGDEQALNLIFINTIGRFNPGWSRMGECSYPNLELGKPDFYKRDACLLNYFESNFKTLVHEVGHWFGLFHPYHGSNCAGENDLVADTPASQNSTIDCPQELDTCPHLPGLDPVGNFMDVTPVTCGMDHTPGQRQRLRDLWQMFRSRKNCQWFGTAPFCDGTCPDGWRAHHGDPSGDGDKCLTGHKTYCCPLVKSLLPLAPEHLLPPA	0.339	21	0.562	21	0.964	3	0.928	0.76	Y	0.45	SignalP-noTM		extr 13, plas 6, E.R. 4, golg 2	AIGDADFSLIGDATVGSVRHHDDVDMLPCYVEEPCPELVRFHEAMAANEHLARRSLSNSTVDGQDEGGLVSIDVYLNIIAPSADEVRPTEEYILKMAGWLQDFYRPFGFLFVPRLPVRTIFNRKWGKGWSKMEMISELHQGDEQALNLIFINTIGRFNPGWSRMGECSYPNLELGKPDFYKRDACLLNYFESNFKTLVHEVGHWFGLFHPYHGSNCAGENDLVADTPASQNSTIDCPQELDTCPHLPGLDPVGNFMDVTPVTCGMDHTPGQRQRLRDLWQMFRSRKNCQWFGTAPFCDGTCPDGWRAHHGDPSGDGDKCLTGHKTYCCPLVKSLLPLAPEHLLPPA	346	none	0.06	extr 27, cyto_nucl 3, nucl 2.5, cyto 2.5	extr	Cluster03393	A4RGT4|MEP1_MAGO7|7e-35	479|PHI:479|MEP1|AAQ07436|199306|Coccidioidesposadasii|Reducedvirulence|9e-30	PF05572|Pregnancy-associated plasma protein-A|8.9E-8;	PTHR19325||2.3E-16;PTHR19325:SF359||2.3E-16;	SSF55486||2.35E-11;	-	-	-	-	-	-	G3DSA:3.40.390.10||1.5E-5;	-	-	-
g2344.t1	Dreco_g2344	MKFIGTILCATCALASAVDVARIPGFERLGDFAKTAGHGKPAAAQALLQVRRVTRSLTETNEAFDKETFATDSDRLAKTIKTSTEIVRDPASYSNTQRSGLLGPTIGIEIEFSILRTKLDGMKTDIEKNGSCQLVRETLDTIASRLSNLAEAINAMVQGDVMALQTSVLLRLLEKIKQDFAAEHCKDSSEKA	0.578	18	0.681	18	0.904	1	0.771	0.729	Y	0.45	SignalP-noTM		extr 13, E.R. 4, cyto 3, mito 2, cyto_nucl 2, cyto_pero 2	DVARIPGFERLGDFAKTAGHGKPAAAQALLQVRRVTRSLTETNEAFDKETFATDSDRLAKTIKTSTEIVRDPASYSNTQRSGLLGPTIGIEIEFSILRTKLDGMKTDIEKNGSCQLVRETLDTIASRLSNLAEAINAMVQGDVMALQTSVLLRLLEKIKQDFAAEHCKDSSEKA	174	none	0.19	cyto 23.5, cyto_nucl 12.5, mito 6	cyto		-	-	PF12296|Hydrophobic surface binding protein A|2.2E-6;	-	-	-	-	-	-	-	-	-	-	-	-
g2353.t1	Dreco_g2353	MDSTGTARFRLLSLLVLVVALCQASRAGVVGGQFNYDRLPKYQPAEALYADVGVITLDRDAYERGAVHFTSRATIPVGVVDKEDFLKKIAVEFQYCSEEYFEVLKTAERQGQPTSQAARSLFRTPNAPAVVSAFHDGRADDSIVYLASSQKGGHKASDAVRGHPELMAECATHGFKGKCAEFSAIEEFLKVDEGGLLKYKNLENFGGKAIMVATKHHSYTGSIEILPACTGGAAPRTRGCVHTLDAYGIKQLADEPGTVYRLQADRKTVLKCSEANESACKDPYRDEVPEGEVTQPTEGKEGAKESENVWKKEWEHFKDDSSSTQEQMEVERLMGKEATMDNEREGNRPMEMEAKSSKSTDDHALESMAEWQAESYFRSTMEQRGYEKVLKDMGPIYDK…	0.721	28	0.819	28	0.985	18	0.927	0.877	Y	0.45	SignalP-noTM		extr 9, E.R. 5, mito 4, cyto 4, cyto_mito 4	VVGGQFNYDRLPKYQPAEALYADVGVITLDRDAYERGAVHFTSRATIPVGVVDKEDFLKKIAVEFQYCSEEYFEVLKTAERQGQPTSQAARSLFRTPNAPAVVSAFHDGRADDSIVYLASSQKGGHKASDAVRGHPELMAECATHGFKGKCAEFSAIEEFLKVDEGGLLKYKNLENFGGKAIMVATKHHSYTGSIEILPACTGGAAPRTRGCVHTLDAYGIKQLADEPGTVYRLQADRKTVLKCSEANESACKDPYRDEVPEGEVTQPTEGKEGAKESENVWKKEWEHFKDDSSSTQEQMEVERLMGKEATMDNEREGNRPMEMEAKSSKSTDDHALESMAEWQAESYFRSTMEQRGYEKVLKDMGPIYDKLRVGFDRGSIPRITRIKSMAGKISLLAP…	683	none	0.17	cyto 23, cyto_nucl 15.5, nucl 6	cyto		-	-	-	-	-	-	-	-	-	-	-	-	-	-	-
g2354.t1	Dreco_g2354	MKGLGSSVVALVSGLAALAGGLGSSDTITWGGDNTRAGYQTTKNMDPAVVGSSQFGQIFRSLLPGRYRGSAEQIFSQPLVYTPSGGTRQFVYVATTQNNLYKLDAKTGEMVASRNLHIPFLTDDLDGCVDINPTIGVIATGVVDPDTDTLYLTAKTYRNQDGGDGPQGRANGRYYVHAVDANDLSERPNFPLDLEGLVATNSAVRVFAGGVHLQRPALLHTGEYVYAAFGSHCVQYDFTGWIIGWHRTTGKIVEAWATEGSGVPADVKGGGIWMSGGGLSSDDAGSIFLATGNGYASQLSNVPVKGFSPPTALEQAALHMTVNGDGSLSLVDFFMPWEKQALDGADKDLGTSPLEILPSQFACGDVKRIGVVTGKSGKTYFLNLDNLGGYRNGPDGLDD…	0.212	24	0.42	24	0.953	14	0.83	0.641	Y	0.45	SignalP-noTM		extr 27	SDTITWGGDNTRAGYQTTKNMDPAVVGSSQFGQIFRSLLPGRYRGSAEQIFSQPLVYTPSGGTRQFVYVATTQNNLYKLDAKTGEMVASRNLHIPFLTDDLDGCVDINPTIGVIATGVVDPDTDTLYLTAKTYRNQDGGDGPQGRANGRYYVHAVDANDLSERPNFPLDLEGLVATNSAVRVFAGGVHLQRPALLHTGEYVYAAFGSHCVQYDFTGWIIGWHRTTGKIVEAWATEGSGVPADVKGGGIWMSGGGLSSDDAGSIFLATGNGYASQLSNVPVKGFSPPTALEQAALHMTVNGDGSLSLVDFFMPWEKQALDGADKDLGTSPLEILPSQFACGDVKRIGVVTGKSGKTYFLNLDNLGGYRNGPDGLDDVLQVYLNPNSVYAGAGVYPLEGGY…	1217	none	0.02	nucl 15, cyto_nucl 14, cyto 9, pero 3, extr 2, golg 2	nucl	Cluster01521	D4AUF1|WSCD1_ARTBC|6e-15	-	PF01822|WSC domain|1.1E-14;PF01822|WSC domain|1.4E-15;PF13570|PQQ-like domain|2.5E-4;	PTHR19297||1.8E-26;	SSF50998||3.3E-12;SSF50998||3.3E-12;	-	-	-	PS51212|WSC domain profile.|9.078;PS51212|WSC domain profile.|9.815;	SM00321|present in yeast cell wall integrity and stress response component proteins|6.8E-4;SM00321|present in yeast cell wall integrity and stress response component proteins|1.3E-6;SM00564|beta-propeller repeat|0.56;SM00564|beta-propeller repeat|180.0;SM00564|beta-propeller repeat|110.0;	Coil||-;	G3DSA:2.140.10.10||2.0E-16;	-	-	-
g2355.t1	Dreco_g2355	MLSPSISPLLAALPLAHALQIPLRAHERTPSTCPDYTKYSQKPHEPLSSGPLALPFMRPAPECRTFTSPAVERVIGDMKQRIRDPDLARLFENTFPSTLDTTVKYFDPTANLAFIVTGDITAQWIRDTGNQFAHLVNLLPQDENLQALVKAVINTEARYLSQFPYCGAFQPPPESGLAPSFNDWAAGVTVNPPVDDKLVFECKYELDSLASFLKLSRSYYDSTEDASFINDNWLAAVKQTLRVIVEQSQSSEVEGESVSYYNWTGSLGSLAPRIPNKGNGKPVKANGLVASHHRPSDDPCFYKFITSVNAMMAVELDHIARILEQEAKHLDHLSREARRYSTLIRDAIWDHTMVEGDIFAYETDGFGNQYIIDDANVPSLLSLPYLGFLDRNDPTYKRT…	0.6	19	0.6	19	0.761	1	0.563	0.58	Y	0.45	SignalP-noTM		extr 17, nucl 4, cyto 2, pero 2, mito_nucl 2, cyto_pero 2	QIPLRAHERTPSTCPDYTKYSQKPHEPLSSGPLALPFMRPAPECRTFTSPAVERVIGDMKQRIRDPDLARLFENTFPSTLDTTVKYFDPTANLAFIVTGDITAQWIRDTGNQFAHLVNLLPQDENLQALVKAVINTEARYLSQFPYCGAFQPPPESGLAPSFNDWAAGVTVNPPVDDKLVFECKYELDSLASFLKLSRSYYDSTEDASFINDNWLAAVKQTLRVIVEQSQSSEVEGESVSYYNWTGSLGSLAPRIPNKGNGKPVKANGLVASHHRPSDDPCFYKFITSVNAMMAVELDHIARILEQEAKHLDHLSREARRYSTLIRDAIWDHTMVEGDIFAYETDGFGNQYIIDDANVPSLLSLPYLGFLDRNDPTYKRTKAKMWSNENPFYAEGKQFS…	507	none	0.43	nucl 20, cyto_nucl 17, cyto 12	nucl	Cluster07166	Q10449|MU157_SCHPO|1e-138	785|PHI:785|MGG_04128|EDJ99431|318829|Magnaportheoryzae|Reducedvirulence|5e-138	PF06824|Protein of unknown function (DUF1237)|1.1E-151;	PTHR31047:SF0||1.1E-209;PTHR31047||1.1E-209;	SSF48208||1.3E-143;	-	-	-	-	-	-	G3DSA:1.50.10.10||5.2E-155;	-	PIRSF028846||2.2E-121;	-
g2367.t1	Dreco_g2367	MVAFRLSGLALLAASSIARAAPTTQDWQTELQPVVAKFVAKNPFLGFALAKLVDGNGEETDWTVSIVCDAKQVEDYPSLTRAVDASSEHHFFDRVCRAFQVCAGQDLDRANAYHTCTLSADNLGYCQPECSYVTPCSHLTPTDDLRRRLDGAHSLEMLSFVRPSNITNPDYPCSKPDGTLRGEAPGTESTQRGDAVSADLLRDFNFYSQHAAATYCNTQYGNDHKIDCEGSCPLVEAAKVQLVHTFYGDVSDINGYVAIDKKREEIVLAIRGSWSARNWWADARATLDDCPYVRGCGIHTGFYSGWRDIKHGVIDAIQKSLLKHSSFRVVATGHSLGGAIATIAVTELRSMETMSNKTIDAFTYGSPRVGNAKFAIFASSQPGTIYRITQGGDPITRMP…	0.655	21	0.755	21	0.959	10	0.871	0.818	Y	0.45	SignalP-noTM		extr 22, mito 4	PTTQDWQTELQPVVAKFVAKNPFLGFALAKLVDGNGEETDWTVSIVCDAKQVEDYPSLTRAVDASSEHHFFDRVCRAFQVCAGQDLDRANAYHTCTLSADNLGYCQPECSYVTPCSHLTPTDDLRRRLDGAHSLEMLSFVRPSNITNPDYPCSKPDGTLRGEAPGTESTQRGDAVSADLLRDFNFYSQHAAATYCNTQYGNDHKIDCEGSCPLVEAAKVQLVHTFYGDVSDINGYVAIDKKREEIVLAIRGSWSARNWWADARATLDDCPYVRGCGIHTGFYSGWRDIKHGVIDAIQKSLLKHSSFRVVATGHSLGGAIATIAVTELRSMETMSNKTIDAFTYGSPRVGNAKFAIFASSQPGTIYRITQGGDPITRMPAIAWHYAHTSPEYWIDDSRDD…	506	none	0.23	cysk 14, nucl 6.5, cyto_nucl 6.5, cyto 5.5, extr 3, mito 3	cysk	Cluster00971	O59952|LIP_THELA|2e-49	432|PHI:432|FGL1|AAQ23181|5518|Fusariumgraminearum|Reducedvirulence|8e-75	PF01764|Lipase (class 3)|1.8E-30;	PTHR21493||1.1E-45;	SSF53474||3.49E-47;	-	-	-	-	-	-	G3DSA:3.40.50.1820||1.6E-59;	-	-	-
g2381.t1	Dreco_g2381	MRRLNVVLLATIQLCLALLPGFDVHSDLLAYPQFEVVFSEGSISDKEAHELLESQARDATDSADGSQSSAGDARETTAADAGNAADEISYSYELMNMPPHRYLCAIPNIPPPGPENQTANELAKAEEARELSRAASSGWELLSQLEDRCLYFMSGWWSYRFCDNHEVAQYHAVTAMTHGQPPRRDPQTPEYVLGRVPALPAGSEVEARDRAGSKSVPAELQVKGDQRYLVQKLEGGTICDLTGRERTIEVQYHCVPGMTTDRIGWIKEVTICAYVMVVNSPRLCQNAVFLPPKETKANAIKCQLISAAAADDDDRSTPRLEQTEGAQPDGVGGAEGEKTTAGSRAGDEAGDEAGHDAAEELGVVTVGGVVVGARHVLSGADEVGKPPLKLAAPQNTFET…	0.686	18	0.792	18	0.955	4	0.921	0.862	Y	0.45	SignalP-noTM		extr 18, E.R. 3, mito 2, cyto 1, pero 1, golg 1, vacu 1, mito_nucl 1, cyto_pero 1	LPGFDVHSDLLAYPQFEVVFSEGSISDKEAHELLESQARDATDSADGSQSSAGDARETTAADAGNAADEISYSYELMNMPPHRYLCAIPNIPPPGPENQTANELAKAEEARELSRAASSGWELLSQLEDRCLYFMSGWWSYRFCDNHEVAQYHAVTAMTHGQPPRRDPQTPEYVLGRVPALPAGSEVEARDRAGSKSVPAELQVKGDQRYLVQKLEGGTICDLTGRERTIEVQYHCVPGMTTDRIGWIKEVTICAYVMVVNSPRLCQNAVFLPPKETKANAIKCQLISAAAADDDDRSTPRLEQTEGAQPDGVGGAEGEKTTAGSRAGDEAGDEAGHDAAEELGVVTVGGVVVGARHVLSGADEVGKPPLKLAAPQNTFETSVGDRMVDVLIKVASKAD…	545	none	0.16	cyto 18, cyto_nucl 17, nucl 14	cyto	Cluster05777	Q4IEA7|OS9_GIBZE|1e-148	-	PF07915|Glucosidase II beta subunit-like protein|1.4E-16;	PTHR15414:SF0||2.2E-66;PTHR15414:SF0||2.2E-66;PTHR15414||2.2E-66;PTHR15414||2.2E-66;	-	-	-	-	-	-	-	-	-	-	-
g2383.t1	Dreco_g2383	MRASRANLVFWLAWLSLAVWCYHNSADDPSSIFYNPAKAYRLRFSTVRTSEVDRFLRQTNVTAPGTRQGPPQLCVGIPSINRTTESFLEHTVGSLVDGLTADERALVHIVVLLADRTPQTHAAYGQEWLGRLVDEVVVYADRLAANATLPAANYHAIPFDVRGEPRGDGRVENMRLDHSVLVERCRGQEAPYFAFVEDDVIATRSWFAKFRSAVGHVERETERSGRDWIYLRLFYSELLMGWNAEESLHYAAGVVAAYTVLLLLFLELRRRHKIGPTAKGATQNFNHAAALVFCLWTPAVIALFFMAGRVSTHRLSPFPLSGVREMPNYGCCAQGLVFPNRHLDGFQRLLRDPPFAFAGDQILEDYARDHGLRKWALDPSVLQHAGQRESSDGPRKADV…	0.681	27	0.785	27	0.981	15	0.91	0.853	Y	0.45	SignalP-noTM		extr 13, plas 9, E.R. 3	DPSSIFYNPAKAYRLRFSTVRTSEVDRFLRQTNVTAPGTRQGPPQLCVGIPSINRTTESFLEHTVGSLVDGLTADERALVHIVVLLADRTPQTHAAYGQEWLGRLVDEVVVYADRLAANATLPAANYHAIPFDVRGEPRGDGRVENMRLDHSVLVERCRGQEAPYFAFVEDDVIATRSWFAKFRSAVGHVERETERSGRDWIYLRLFYSELLMGWNAEESLHYAAGVVAAYTVLLLLFLELRRRHKIGPTAKGATQNFNHAAALVFCLWTPAVIALFFMAGRVSTHRLSPFPLSGVREMPNYGCCAQGLVFPNRHLDGFQRLLRDPPFAFAGDQILEDYARDHGLRKWALDPSVLQHAGQRESSDGPRKADVWNFSFERLHE	382	none	0.14	plas 23, E.R. 5, cyto 3	plas	Cluster10177	-	-	PF04666|N-Acetylglucosaminyltransferase-IV (GnT-IV) conserved region|1.4E-7;	PTHR31410:SF1||2.2E-26;PTHR31410:SF1||2.2E-26;PTHR31410||2.2E-26;PTHR31410||2.2E-26;	-	-	-	-	-	-	-	-	-	-	-
g2389.t1	Dreco_g2389	MKTSMFTVLAASAAVVSAAPAVKREVNFGGLFGPLSGLANLGGMGAGVSGAGQDATAEFFKLADGVLNVPIDAITKVMKGDPMGAMTGLAKNAAGFVGSLPGDAVKIAGNLVPKGGKN	0.383	19	0.552	19	0.867	2	0.787	0.679	Y	0.45	SignalP-noTM		extr 20, E.R. 3, vacu 2	PAVKREVNFGGLFGPLSGLANLGGMGAGVSGAGQDATAEFFKLADGVLNVPIDAITKVMKGDPMGAMTGLAKNAAGFVGSLPGDAVKIAGNLVPKGGKN	99	none	0	cyto 23, cyto_nucl 14.5, nucl 4, mito 3	cyto		-	-	-	-	-	-	-	-	-	-	-	-	-	-	-
g2422.t1	Dreco_g2422	MRATIVLCIVPLVLGAVEPVTNPACSQPNPKVVSNGWWPWSVNSQTQAWCALEKACNRDPSEVDCPPRHTHSECRFIGGLRFKLCELSRNATRI	0.688	16	0.792	16	0.942	12	0.915	0.858	Y	0.45	SignalP-noTM		extr 25	VEPVTNPACSQPNPKVVSNGWWPWSVNSQTQAWCALEKACNRDPSEVDCPPRHTHSECRFIGGLRFKLCELSRNATRI	78	none	0.16	extr 22, nucl 7	extr		-	-	-	-	-	-	-	-	-	-	-	-	-	-	-
g2423.t1	Dreco_g2423	MRCLAIVLTASLAVPGIVAGGWLPGTKAVFNKWHETELERWLSDHGVPFPTPADRKDLVDFVEKSWNDVVVEPYRSWDAAQLASFLGAKTKDAGTDAEGTAESLMGNVKARWDETEAAGLGWATSAKDWILDTCLLERARAGYDAAASKVGETVAYPGNWMYASWSDSDLRSWLETYGFPTPQDATRDGVIASVRRYSRTAHLKRQREAARARAEVEARFATLTDAVLDGWDESRLKEFCDENGIRRPQGTRPNELRALVRHRRDAVAARARSAFGAATSNAGNQYARATDAASAAARAAFDEAAGAWSESRLKAYLDARGIPVAAETGADDLLALVRKHAHGAATASTAHALDDFSRDNLKQYLLKHGDAAARAVAERSEATRDELLGAARAAYSSAS…	0.564	20	0.702	20	0.922	6	0.869	0.792	Y	0.45	SignalP-noTM		extr 20, mito 2, plas 1, pero 1, E.R. 1, golg 1, vacu 1, cyto_mito 1, mito_nucl 1	GWLPGTKAVFNKWHETELERWLSDHGVPFPTPADRKDLVDFVEKSWNDVVVEPYRSWDAAQLASFLGAKTKDAGTDAEGTAESLMGNVKARWDETEAAGLGWATSAKDWILDTCLLERARAGYDAAASKVGETVAYPGNWMYASWSDSDLRSWLETYGFPTPQDATRDGVIASVRRYSRTAHLKRQREAARARAEVEARFATLTDAVLDGWDESRLKEFCDENGIRRPQGTRPNELRALVRHRRDAVAARARSAFGAATSNAGNQYARATDAASAAARAAFDEAAGAWSESRLKAYLDARGIPVAAETGADDLLALVRKHAHGAATASTAHALDDFSRDNLKQYLLKHGDAAARAVAERSEATRDELLGAARAAYSSASTAGGAAYASATAYLASATAA…	487	none	0.29	nucl 20.5, cyto_nucl 13.8333, cyto 6, cyto_golg 3.83333, extr 2	nucl	Cluster01443	Q9Y7X6|ISH1_SCHPO|3e-11	-	PF10281|Putative stress-responsive nuclear envelope protein|5.5E-10;PF10281|Putative stress-responsive nuclear envelope protein|6.3E-8;PF10281|Putative stress-responsive nuclear envelope protein|1.7E-7;	-	-	-	-	-	-	-	-	-	-	-	-
g2424.t1	Dreco_g2424	MQFFATVVTLFAALATASPLANSANAKRSQVEESEFENLQYALLDCVENNWQPATPEPETLGMIWSTDLVSSLGTEAQLQQAIDDCHAGVATGALKGLKPKNAAGN	0.444	18	0.636	18	0.948	12	0.912	0.785	Y	0.45	SignalP-noTM		extr 24, vacu 2	PLANSANAKRSQVEESEFENLQYALLDCVENNWQPATPEPETLGMIWSTDLVSSLGTEAQLQQAIDDCHAGVATGALKGLKPKNAAGN	88	none	0.06	extr 18, cyto 6.5, cyto_nucl 6.5, nucl 5.5	extr		-	-	-	-	-	-	-	-	-	-	-	-	-	-	-
g2432.t1	Dreco_g2432	MVAGASRSAMKTLRFASLASLLVGLAALAGAAWDVSQPLNGISFQRIKAVQAPTPDRPSMKFSRLRNVKGKPGVLTTTSALGRVLRTPPLHHQHTYQNVSTAGDFSTQYAIQCGWDGVPLWLLFDTGSSDTWTVQTGFECNGGGRYEQSACGFGPTTVDGFKDGPIDDLHFLLRYGSGEKVHGPMGYSDIACGGVHVSRQQVGLANYTLWHGNNLTVGILGLAYPSLTSAFYGPIGTEAPWNAITYTPFLTKAIMQGTIDPVFSVAILKNSSEGMLAWGGLPPMERPRGSFAATDLIIANLIGQSETSWRYSFYTIIPDGVKWGQSTDTTKFPYIVDTGTTMNYLPPPLAEAIAMAFQPRAVFMYQWGSYFAPCHAIPPHFAIIISGVEFWINPADLIY…	0.31	32	0.54	32	0.976	23	0.886	0.727	Y	0.45	SignalP-noTM		extr 20, plas 3, E.R. 2	WDVSQPLNGISFQRIKAVQAPTPDRPSMKFSRLRNVKGKPGVLTTTSALGRVLRTPPLHHQHTYQNVSTAGDFSTQYAIQCGWDGVPLWLLFDTGSSDTWTVQTGFECNGGGRYEQSACGFGPTTVDGFKDGPIDDLHFLLRYGSGEKVHGPMGYSDIACGGVHVSRQQVGLANYTLWHGNNLTVGILGLAYPSLTSAFYGPIGTEAPWNAITYTPFLTKAIMQGTIDPVFSVAILKNSSEGMLAWGGLPPMERPRGSFAATDLIIANLIGQSETSWRYSFYTIIPDGVKWGQSTDTTKFPYIVDTGTTMNYLPPPLAEAIAMAFQPRAVFMYQWGSYFAPCHAIPPHFAIIISGVEFWINPADLIYQDLKDPLTGYCAVAIASGGSGPYILGDVFLQN…	417	none	0.01	cyto 13, cyto_nucl 12, nucl 7, extr 5, mito 2, pero 2, cysk 2, mito_pero 2	cyto	Cluster06170	Q4WFS2|Y1220_ASPFU|2e-56	17|PHI:17|ACP|CAA43678|5482|Candidatropicalis|Reducedvirulence|6e-08	PF00026|Eukaryotic aspartyl protease|7.2E-37;	PTHR13683||3.0E-35;PTHR13683||3.0E-35;PTHR13683:SF249||3.0E-35;PTHR13683:SF249||3.0E-35;PTHR13683||3.0E-35;PTHR13683:SF249||3.0E-35;	SSF50630||3.47E-49;	-	-	-	-	-	-	G3DSA:2.40.70.10||4.7E-25;G3DSA:2.40.70.10||8.9E-26;	-	-	PR00792|Pepsin (A1) aspartic protease family signature|1.2E-9;PR00792|Pepsin (A1) aspartic protease family signature|1.2E-9;PR00792|Pepsin (A1) aspartic protease family signature|1.2E-9;
g2448.t1	Dreco_g2448	MRFARAIAAVLSAAVAHAASQNARPITGNPKGVRYTATLPEDPFFHGDFDGNVEGFITAETPDDGVGVKFTVHFENLPKSGGPFPYHIHVKPVVGGNCTQTLAHLDPFERGEKPPCASSAPETCQVGDLAGKHGMVTADPFQAEYVDKFVSLKEGDAEFMGNRSFVFHFANTTRITCANFVKMDVGAPYPSASSSVYPVPTASGATPARPAATDSTVPFVVSAASKAHTTLPFVAIAGVALLAFAG	0.274	19	0.457	19	0.802	1	0.751	0.616	Y	0.45	SignalP-noTM		extr 25	SQNARPITGNPKGVRYTATLPEDPFFHGDFDGNVEGFITAETPDDGVGVKFTVHFENLPKSGGPFPYHIHVKPVVGGNCTQTLAHLDPFERGEKPPCASSAPETCQVGDLAGKHGMVTADPFQAEYVDKFVSLKEGDAEFMGNRSFVFHFANTTRITCANFVKMDVGAPYPSASSSVYPVPTASGATPARPAATDSTVPFVVSAASKAHTTLPFVAIAGVALLAFAG	227	none	0.01	mito 12, plas 8, extr_plas 5.5, cyto 5, E.R. 5	mito	Cluster00832	D4B5D4|SOD5_ARTBC|1e-27	383|PHI:383|SOD5|EAL00626|5476|Candidaalbicans|Lossofpathogenicity|5e-28	PF00080|Copper/zinc superoxide dismutase (SODC)|3.5E-11;	PTHR10003||2.6E-37;PTHR10003:SF37||2.6E-37;	SSF49329||1.05E-22;	-	-	-	-	-	-	G3DSA:2.60.40.200||1.4E-17;	-	-	-
g2457.t1	Dreco_g2457	MKASLIIALAASLVAGQLDSIPTCAQGCVGKYITGGGVAGCKTADIACVCRNKDFLDGIACCLADVCSQEDQDKSVKFARQLCTSSGVQVPDKVVCNKAASSATTTTSTSATASATNAAQSSTSKAAAAPVVGNIGGLTGAVLAMLAAL	0.359	17	0.573	17	0.946	11	0.912	0.756	Y	0.45	SignalP-noTM		extr 27	LDSIPTCAQGCVGKYITGGGVAGCKTADIACVCRNKDFLDGIACCLADVCSQEDQDKSVKFARQLCTSSGVQVPDKVVCNKAASSATTTTSTSATASATNAAQSSTSKAAAAPVVGNIGGLTGAVLAMLAAL	132	none	0.03	extr 18, cyto 9, extr_plas 9	extr	Cluster06780	D4AXU8|CFMC_ARTBC|1e-13	-	PF05730|CFEM domain|9.1E-14;	-	-	-	-	-	-	SM00747||3.2E-7;	-	-	-	-	-
g2505.t1	Dreco_g2505	MSLSFATLLLALAFGVTDAQFLRPDERTRNLTVINLPGNVNVSYKEPHGVCKTAASSQQQYTGWVSVPGDYAANLFFYYVEAREPTDNLTVWLTGGPGGSSLYAFFGYNGPCEIVERGLNSYETVAREWGWDGASNMLFIDQPNHTGFSYDTPTDGTLSMVEETLVMPPTYDPNAVTSWDSVNGTFSSGNPMHTANTTQSAALAVWHVMQGFLTATPHRHLNRTSSLAVSLFTESYGGIYGPIFSEVWQKQNEKWRAGALDPSAVEIRLTSLGILNGCVDVATDVANFVHFGVNNTYGIKFFSAQEADELLRNFTAPGGDKDLIAHCAALAAQLDAEGAGHQPEVIDACSKATEMYNKTKMIPVQSGKSPYDILAPERHPPGPLRLLDYLNQAEILNAI…	0.819	20	0.872	20	0.971	10	0.923	0.899	Y	0.45	SignalP-noTM		extr 27	FLRPDERTRNLTVINLPGNVNVSYKEPHGVCKTAASSQQQYTGWVSVPGDYAANLFFYYVEAREPTDNLTVWLTGGPGGSSLYAFFGYNGPCEIVERGLNSYETVAREWGWDGASNMLFIDQPNHTGFSYDTPTDGTLSMVEETLVMPPTYDPNAVTSWDSVNGTFSSGNPMHTANTTQSAALAVWHVMQGFLTATPHRHLNRTSSLAVSLFTESYGGIYGPIFSEVWQKQNEKWRAGALDPSAVEIRLTSLGILNGCVDVATDVANFVHFGVNNTYGIKFFSAQEADELLRNFTAPGGDKDLIAHCAALAAQLDAEGAGHQPEVIDACSKATEMYNKTKMIPVQSGKSPYDILAPERHPPGPLRLLDYLNQAEILNAIGSPVNFTMLSDPVFQNFKKT…	588	none	0.06	cyto_nucl 14, nucl 13, cyto 13, mito 3	cyto_nucl	Cluster00403	Q5J6J1|SPCA_TRIRU|1e-107	901|PHI:901|um01886||5270|Ustilagomaydis|Unaffectedpathogenicity|4e-15	PF00450|Serine carboxypeptidase|4.9E-62;	PTHR11802:SF93||2.5E-156;PTHR11802:SF93||2.5E-156;PTHR11802||2.5E-156;PTHR11802||2.5E-156;	SSF53474||1.01E-69;SSF53474||1.01E-69;	-	-	-	-	-	-	G3DSA:3.40.50.1820||3.5E-85;	-	-	-
g2506.t1	Dreco_g2506	MKFATTYSYAVAILVGLATASPLADPSVARRSVLTASDFQDERVLLVGCLEDSCQPDGPAAFSNWATSLVSRIEGKADLDKALKECKRGCVRGVLSGIGPQSGTDEFFEKEENEQS	0.52	21	0.595	21	0.787	18	0.687	0.645	Y	0.45	SignalP-noTM		extr 12, mito 8.5, cyto_mito 7.5, cyto 5.5	PLADPSVARRSVLTASDFQDERVLLVGCLEDSCQPDGPAAFSNWATSLVSRIEGKADLDKALKECKRGCVRGVLSGIGPQSGTDEFFEKEENEQS	95	none	0.03	extr 16, nucl 9.5, cyto_nucl 8, extr_plas 8	extr	Cluster01087	-	-	-	-	-	-	-	-	-	-	-	-	-	-	-
g2508.t1	Dreco_g2508	MKFATTCSYAVTLLVGLVTASPLADSSLAGRGMMLASDFKDERVQLVSCLEHFCQAADGLPAHSAWATSQVDRIKSKADLDQALKECKRGCVRGILSDVEKSQ	0.486	21	0.627	21	0.87	5	0.808	0.725	Y	0.45	SignalP-noTM		extr 15, mito 5, cyto 4.5, cyto_nucl 3.5	PLADSSLAGRGMMLASDFKDERVQLVSCLEHFCQAADGLPAHSAWATSQVDRIKSKADLDQALKECKRGCVRGILSDVEKSQ	82	none	0.09	extr 13, nucl 13, cyto 4	extr	Cluster01087	-	-	-	-	-	-	-	-	-	-	-	-	-	-	-
g2511.t1	Dreco_g2511	MKLATTCSYAVTLLVGPATASLIGSESFFVKNNLLTAPDFGMLRLELASCLRGACQPASGITLFGTWAISQVNRIKSEADLNQALKECRGGCIRGIVSDVEMLGTKKKCGNNRG	0.393	21	0.452	21	0.622	2	0.511	0.484	Y	0.45	SignalP-noTM		extr 12, mito 11, cyto 3	LIGSESFFVKNNLLTAPDFGMLRLELASCLRGACQPASGITLFGTWAISQVNRIKSEADLNQALKECRGGCIRGIVSDVEMLGTKKKCGNNRG	93	none	0.15	extr 18, cyto 8.5, cyto_nucl 6, nucl 2.5	extr	Cluster01087	-	-	-	-	-	-	-	-	-	-	-	-	-	-	-
g2512.t1	Dreco_g2512	MHVSRLRSAWIVSTVLLGATDAASAEKRKFQLGANICSGFNTVCTGTDLACGRYYDNQQLHKVVYASQDDCFRDHGPRPRIYKQWSPPRGACVGASENCLGTDEVCGAITNATTRHTCFRFRTKGPWLQPNSQRCAQKISEPCKGTAEWCELKAESYGSVQACLNQRLPSSSAPSWFEPDAAKCENATAEACLGTTELCDRNAMVQAAAGLGGKDLQLLNDMMSSVPIRVTPGLRNAWRQYNDKKDDCIAARGRVPFSAIFSPRCDGDLASEECRGTLAWCEDDSNRGDMSVEECLKKRSTKPAKLSPWFYPQSCSEASEICQGSEGICRKTMPVAQRADCLASRDTPYWQWKTPGTNSSDPLVLELDSGSEEYCHYHYSLMDYADEFECYAARGQDYR…	0.668	26	0.681	26	0.841	6	0.711	0.697	Y	0.45	SignalP-noTM		extr 10, mito 9, nucl 4, cyto 3	KRKFQLGANICSGFNTVCTGTDLACGRYYDNQQLHKVVYASQDDCFRDHGPRPRIYKQWSPPRGACVGASENCLGTDEVCGAITNATTRHTCFRFRTKGPWLQPNSQRCAQKISEPCKGTAEWCELKAESYGSVQACLNQRLPSSSAPSWFEPDAAKCENATAEACLGTTELCDRNAMVQAAAGLGGKDLQLLNDMMSSVPIRVTPGLRNAWRQYNDKKDDCIAARGRVPFSAIFSPRCDGDLASEECRGTLAWCEDDSNRGDMSVEECLKKRSTKPAKLSPWFYPQSCSEASEICQGSEGICRKTMPVAQRADCLASRDTPYWQWKTPGTNSSDPLVLELDSGSEEYCHYHYSLMDYADEFECYAARGQDYREFSDSIFAAVVPIAEKAVLDGGAKVL…	459	none	0.73	nucl 14.5, cyto_nucl 14.5, cyto 9.5, mito 6	nucl	Cluster05817	-	-	-	-	-	-	-	-	-	-	-	-	-	-	-
g2513.t1	Dreco_g2513	MILLAALLPSLALQAHVVEQRADNDDDSAAASYAPSSVACPSPVPTIRHATNLSAEETAWLPVRDRNIVSALKTLLGRVNIGDIDVNAYIDNIVKDVDADVAEASLPRIGIAVSGGGYRALMNGAGALAAFDDRTTHSSGQGQLAGLLQASTYLSGLSGGSWLVGSLFVQNFTTVQSIVSSTSGFLSTLWQFGDSILEGPKGLRTGQYYRALRDSVQAKTDAGFNTTITDYWGRALSYQLVNPTDGGPAFTFSSIANSSDFSQAQTPMPLIVAIERAPGQLQIAPNSTIFEFNPWEMGSYDTGASFFAPLQYVGSNFSDGVVGGGGKKCVTGVDNAGFVMGTSSSLFNQAFLQLGKVSAGPDFLLNALNESLGNIGEENRDIASWPNPFYKLSAGSNIN…	0.153	16	0.365	16	0.926	7	0.867	0.636	Y	0.45	SignalP-noTM		extr 27	VVEQRADNDDDSAAASYAPSSVACPSPVPTIRHATNLSAEETAWLPVRDRNIVSALKTLLGRVNIGDIDVNAYIDNIVKDVDADVAEASLPRIGIAVSGGGYRALMNGAGALAAFDDRTTHSSGQGQLAGLLQASTYLSGLSGGSWLVGSLFVQNFTTVQSIVSSTSGFLSTLWQFGDSILEGPKGLRTGQYYRALRDSVQAKTDAGFNTTITDYWGRALSYQLVNPTDGGPAFTFSSIANSSDFSQAQTPMPLIVAIERAPGQLQIAPNSTIFEFNPWEMGSYDTGASFFAPLQYVGSNFSDGVVGGGGKKCVTGVDNAGFVMGTSSSLFNQAFLQLGKVSAGPDFLLNALNESLGNIGEENRDIASWPNPFYKLSAGSNINANASLLTLVDGGEALE…	613	none	0.02	cyto 12.5, cyto_nucl 9, pero 5, nucl 4.5, E.R. 4, mito_pero 4	cyto	Cluster00392	P0C957|PLB1_ASPFU|0	105|PHI:105|PLB1|AAC61890|5476|Candidaalbicans|Reducedvirulence|1e-102	PF01735|Lysophospholipase catalytic domain|3.4E-170;	PTHR10728:SF33||2.9E-194;PTHR10728:SF33||2.9E-194;PTHR10728||2.9E-194;PTHR10728||2.9E-194;	SSF52151||2.88E-136;	-	-	-	PS51210|PLA2c domain profile.|118.437;	SM00022|Cytoplasmic phospholipase A2, catalytic subunit|7.3E-205;	-	G3DSA:3.40.1090.10||7.8E-133;	-	-	-
g2515.t1	Dreco_g2515	MKSIVAYAVATLVAFANALPTTNVNEMPEVVARSSLESRATNCSVAATDTLLFSVPIGAFLEARKARDPSQCSWASDGCTMAPDKPISFNFIPSCQRHDFGYRNCRDQKRFTSAMRKKIDDVFKKDLYKYCSQFSGWHFWKGYQCRRLADTYYAAVRTFGKRDGGYVDLDQPVELVERGPRFD	0.525	19	0.586	19	0.803	9	0.664	0.628	Y	0.45	SignalP-noTM		extr 19, plas 2, golg 2, mito 1, cyto 1, pero 1, E.R. 1, cyto_mito 1, cyto_pero 1	PTTNVNEMPEVVARSSLESRATNCSVAATDTLLFSVPIGAFLEARKARDPSQCSWASDGCTMAPDKPISFNFIPSCQRHDFGYRNCRDQKRFTSAMRKKIDDVFKKDLYKYCSQFSGWHFWKGYQCRRLADTYYAAVRTFGKRDGGYVDLDQPVELVERGPRFD	164	none	0.44	cyto 13, cyto_nucl 13, nucl 9, extr 7	cyto	Cluster04174	D4B0M5|A2001_ARTBC|2e-44	-	PF09056|Prokaryotic phospholipase A2|2.8E-41;	PTHR40787||2.8E-34;PTHR40787:SF2||2.8E-34;	SSF48619||4.87E-32;	-	-	-	-	-	-	G3DSA:1.20.90.10||6.6E-41;	-	-	-
g2516.t1	Dreco_g2516	MLSTSTVNGMAAVTRRRHLPSDCFLPALGHLAVFLLLAMPAAAAQAEGTQSLSSAKDFSSLRPCAKSCFWRTNFQTRTYDYLGSTLKCELTTTEFQTISVAMNGCYCRTDLQANAYQSLSRCVSRFCSGNSNDLSSAASIYSSYCTSNGFIANNEAAATGAGDQGGADDGQGGSGSPQKTGGGGDSNSGAEMGSAGRGMLVIGLCLALFGRLDVSW	0.562	47	0.656	47	0.928	43	0.507	0.575	Y	0.45	SignalP-noTM		extr 13, plas 7, E.R. 3, nucl 2	GTQSLSSAKDFSSLRPCAKSCFWRTNFQTRTYDYLGSTLKCELTTTEFQTISVAMNGCYCRTDLQANAYQSLSRCVSRFCSGNSNDLSSAASIYSSYCTSNGFIANNEAAATGAGDQGGADDGQGGSGSPQKTGGGGDSNSGAEMGSAGRGMLVIGLCLALFGRLDVSW	169	none	0.24	mito 13, extr_plas 8.5, plas 8, mito_nucl 8	mito	Cluster11073	-	-	-	-	-	-	-	-	-	-	-	-	-	-	-
g2519.t1	Dreco_g2519	MLHSLLALPSRRTTPWAVILPLLSSGALAKTVLVEVGSAGFTYSPNSVQADVGDVVQFHFNGAHSVTSGPFNGPCTPDSSGGFYSGFLTANASTTIDPIPPPSSSASRPTASKGRALTWR	0.803	30	0.685	30	0.789	26	0.564	0.62	Y	0.45	SignalP-noTM		extr 25	TVLVEVGSAGFTYSPNSVQADVGDVVQFHFNGAHSVTSGPFNGPCTPDSSGGFYSGFLTANASTTIDPIPPPSSSASRPTASKGRALTWR	90	none	0.03	nucl 17.5, cyto_nucl 13, cyto 7.5, extr 5	nucl		P0DN32|CUPR1_ARTBC|3e-09	-	-	PTHR34883||1.0E-14;	SSF49503||3.94E-8;	-	-	-	-	-	-	G3DSA:2.60.40.420||2.8E-6;	-	-	-
g2521.t1	Dreco_g2521	MRPSTAVAAALSTWLALAAAFPHPIAGPRALPGAGAKPKYAVVPLEPAEAQPGQGDRPPSDAKVTVVKTVVKSMEPATKTVSKTISIPVIDLSPEPTKTVTVTPSEAPSIVLIYPSFSNSTLTVTASSDSSTSSAGPLTLTTSVMSVTSQTTSSAAVSSARAYNSTTTFVTSTMHRATSSATSSSITYDDGQWHTTYPSWNGTMNHYRRS	0.665	21	0.752	21	0.927	18	0.845	0.802	Y	0.45	SignalP-noTM		extr 17, mito 4, cyto 4, cyto_mito 4	PHPIAGPRALPGAGAKPKYAVVPLEPAEAQPGQGDRPPSDAKVTVVKTVVKSMEPATKTVSKTISIPVIDLSPEPTKTVTVTPSEAPSIVLIYPSFSNSTLTVTASSDSSTSSAGPLTLTTSVMSVTSQTTSSAAVSSARAYNSTTTFVTSTMHRATSSATSSSITYDDGQWHTTYPSWNGTMNHYRRS	189	none	0.19	nucl 18.5, cyto_nucl 15.5, cyto 7.5, mito 4	nucl		-	-	-	-	-	-	-	-	-	-	-	-	-	-	-
g2522.t1	Dreco_g2522	MAPQRSLGKSILLIMVSMSGIWAGMQRAPVDHSIHRRQEVVGSACSSEGQWYCMTNSWQRCASGQWGVVMPCAAGTSCSPAGLTTDLQVQQGGQGQAQRDGAAQAQRDGEAQAQRDGKAHGQVGRGGSDGPNTGLGPLLPIPLLAMAMLL	0.342	24	0.52	24	0.89	20	0.787	0.664	Y	0.45	SignalP-noTM		extr 15, mito 8, plas 3	MQRAPVDHSIHRRQEVVGSACSSEGQWYCMTNSWQRCASGQWGVVMPCAAGTSCSPAGLTTDLQVQQGGQGQAQRDGAAQAQRDGEAQAQRDGKAHGQVGRGGSDGPNTGLGPLLPIPLLAMAMLL	126	none	0.24	plas 12, mito 11, extr_plas 9, extr 4, E.R. 3	plas		-	-	-	-	-	-	-	-	-	-	-	-	-	-	-
g2526.t1	Dreco_g2526	MKRSVLAGLAVLAAAAAAAASTTGCIIDGPFPDSLNGSNFTYPWPVKVFQFTSQLQPLQMAFMDVEPACRPNGMTAVLLHGKNFCGPTWETTMHVLTQHGYRVVVPDQIGFCKSSKPAAYQFSLGQMASNTRLLLDMLDVGNVTVIGHSLGGMMAVRIALQYPEAVDEMVVVAPVGLEDYVKKGVPYVGLDTTAKSEAASGYDSIRAYEKKVYYVDRWRPAYETWVQMLVNIYHGSERDAYVKNQAQVVDMVLTGPVAHCFGDIQPRTLLIVGDKDRTAIGSQWSSPDVAAKLGRFDLLGPEAAHQLQNGQLHRFTNLGHAPQLSDPNAFHDVVLNFLHWNQTREARHAIHQDLHAGHRAR	0.44	21	0.63	21	0.965	5	0.902	0.777	Y	0.45	SignalP-noTM		extr 21, plas 2, E.R. 2	TTGCIIDGPFPDSLNGSNFTYPWPVKVFQFTSQLQPLQMAFMDVEPACRPNGMTAVLLHGKNFCGPTWETTMHVLTQHGYRVVVPDQIGFCKSSKPAAYQFSLGQMASNTRLLLDMLDVGNVTVIGHSLGGMMAVRIALQYPEAVDEMVVVAPVGLEDYVKKGVPYVGLDTTAKSEAASGYDSIRAYEKKVYYVDRWRPAYETWVQMLVNIYHGSERDAYVKNQAQVVDMVLTGPVAHCFGDIQPRTLLIVGDKDRTAIGSQWSSPDVAAKLGRFDLLGPEAAHQLQNGQLHRFTNLGHAPQLSDPNAFHDVVLNFLHWNQTREARHAIHQDLHAGHRAR	340	none	0.06	cyto 16.5, cyto_nucl 15, nucl 10.5, extr 3	cyto	Cluster12387	A1VUV0|BPHD_POLNA|6e-14	-	PF00561|alpha/beta hydrolase fold|6.9E-18;	PTHR10992||1.1E-70;PTHR10992:SF827||1.1E-70;	SSF53474||1.32E-51;	-	-	-	PS51257|Prokaryotic membrane lipoprotein lipid attachment site profile.|6.0;	-	Coil||-;	G3DSA:3.40.50.1820||7.8E-52;	-	-	PR00111|Alpha/beta hydrolase fold signature|1.1E-12;PR00111|Alpha/beta hydrolase fold signature|1.1E-12;PR00111|Alpha/beta hydrolase fold signature|1.1E-12;PR00111|Alpha/beta hydrolase fold signature|1.1E-12;
g2558.t1	Dreco_g2558	MVLLKGFALSAVVAVAAAKSAVIDLLSSNFDDVVLKSGKATFVEFYAPWCGHCKNLAPIWEDLGVAYEHAKNKVQIAKVNGDEDRALSKRFGIQGFPTLKFFDGKSDTPLDYEEARDLQSLSNFIRKQVGIEGKKKVEVPSNVVMLNERSFPKAIGGDQNILVAFTAPWCGHCKTLAPIWEDIANSFASEDNVMVAKVDADAADGKLVGKEYGITGYPTLKYFRAGSKKAEPYEGGRTEADFVEFMNGIAGTQRMPGGELNSQAGTVASLDTLVSKMLGDGKMTDITAELEKESEKLTKAAQKKYAEYYVRVVNKLSKSEAFAEKELTRLTGILSKGGIAPLKRDEIQRKLNVLRKFTEGVGDKVTESVGEKVTESVGDQATKEEAKDEL	0.394	19	0.576	19	0.905	5	0.837	0.717	Y	0.45	SignalP-noTM		extr 13, E.R. 8, cyto 3, golg 2	SAVIDLLSSNFDDVVLKSGKATFVEFYAPWCGHCKNLAPIWEDLGVAYEHAKNKVQIAKVNGDEDRALSKRFGIQGFPTLKFFDGKSDTPLDYEEARDLQSLSNFIRKQVGIEGKKKVEVPSNVVMLNERSFPKAIGGDQNILVAFTAPWCGHCKTLAPIWEDIANSFASEDNVMVAKVDADAADGKLVGKEYGITGYPTLKYFRAGSKKAEPYEGGRTEADFVEFMNGIAGTQRMPGGELNSQAGTVASLDTLVSKMLGDGKMTDITAELEKESEKLTKAAQKKYAEYYVRVVNKLSKSEAFAEKELTRLTGILSKGGIAPLKRDEIQRKLNVLRKFTEGVGDKVTESVGEKVTESVGDQATKEEAKDEL	371	none	0.08	cyto 19, cyto_nucl 16.5, nucl 10	cyto	Cluster00561	Q92249|ERP38_NEUCR|1e-139	2644|PHI:2644|thioredoxin1|P0AA28|90371|SalmonellaentericaserovarTyphimurium|Reducedvirulence|4e-15	PF00085|Thioredoxin|5.3E-25;PF00085|Thioredoxin|4.0E-27;PF07749|Endoplasmic reticulum protein ERp29, C-terminal domain|1.1E-23;	PTHR18929||6.0E-95;PTHR18929:SF87||6.0E-95;	SSF47933||4.19E-22;SSF52833||1.12E-31;SSF52833||7.86E-34;	TIGR01126|pdi_dom: protein disulfide-isomerase domain|1.1E-33;TIGR01126|pdi_dom: protein disulfide-isomerase domain|5.9E-37;	-	PS00194|Thioredoxin family active site.|-;PS00194|Thioredoxin family active site.|-;	PS51352|Thioredoxin domain profile.|16.698;PS51352|Thioredoxin domain profile.|14.07;	-	Coil||-;	G3DSA:3.40.30.10||9.8E-35;G3DSA:3.40.30.10||2.1E-36;G3DSA:1.20.1150.12||2.2E-23;	-	-	PR00421|Thioredoxin family signature|3.4E-7;PR00421|Thioredoxin family signature|3.4E-7;PR00421|Thioredoxin family signature|3.4E-7;			PR00421|Thioredoxin family signature|3.4E-7;PR00421|Thioredoxin family signature|3.4E-7;PR00421|Thioredoxin family signature|3.4E-7;
g2570.t1	Dreco_g2570	MRSLVSALATLALARHALADPTWPSDVDELEEIMYQLSSFGARKFADTVNPCANEASGPGRQNAAEWLRLAFHDMSTANSFFHTGGLDASLQYELDNGENTGPGHKTTLQFMSPYVSPRSSLSDLIAMGVYMSVRSCGGPAVPFRAGRKDATEKGPTGVPQPQNSAFTFQQQFERMGFTKEEMIQLTACGHTLGGVHKDEFPELMPPGGVKNGAADLDSTAAVFDNKIVTEYLSGQTKNPLVVGPSVKVNKHSDFKVFNSDGNKTLEGMKDKAKFQDICKAVLQKMIDVVPPTVTLSDPILPYAVKPVRMQLTLADGGTALSLTGYIRVKTTGMAKDAIKNISIRYKDRQGASRCGADSCTITSSLQGVGQGFDDTFAFFPIQASIPASSGISSFTVTV…	0.87	20	0.822	20	0.876	14	0.782	0.8	Y	0.45	SignalP-noTM		extr 14, mito 10, cyto 3	PTWPSDVDELEEIMYQLSSFGARKFADTVNPCANEASGPGRQNAAEWLRLAFHDMSTANSFFHTGGLDASLQYELDNGENTGPGHKTTLQFMSPYVSPRSSLSDLIAMGVYMSVRSCGGPAVPFRAGRKDATEKGPTGVPQPQNSAFTFQQQFERMGFTKEEMIQLTACGHTLGGVHKDEFPELMPPGGVKNGAADLDSTAAVFDNKIVTEYLSGQTKNPLVVGPSVKVNKHSDFKVFNSDGNKTLEGMKDKAKFQDICKAVLQKMIDVVPPTVTLSDPILPYAVKPVRMQLTLADGGTALSLTGYIRVKTTGMAKDAIKNISIRYKDRQGASRCGADSCTITSSLQGVGQGFDDTFAFFPIQASIPASSGISSFTVTVNDKVYDNNGNGYPMQDDVIF…	886	none	0.2	nucl 21.5, cyto_nucl 15.5, cyto 8.5	nucl	Cluster00835	D4AUF4|WSCD2_ARTBC|0	-	PF00141|Peroxidase|3.3E-24;PF01822|WSC domain|1.0E-17;PF01822|WSC domain|6.7E-16;PF01822|WSC domain|1.1E-18;	PTHR31356:SF4||4.7E-59;PTHR31356||4.7E-59;	SSF48113||2.8E-50;	-	-	-	PS51212|WSC domain profile.|10.908;PS51212|WSC domain profile.|10.72;PS50873|Plant heme peroxidase family profile.|12.302;PS51212|WSC domain profile.|10.824;	SM00321|present in yeast cell wall integrity and stress response component proteins|7.8E-14;SM00321|present in yeast cell wall integrity and stress response component proteins|1.8E-12;SM00321|present in yeast cell wall integrity and stress response component proteins|2.2E-6;	-	G3DSA:1.10.520.10||4.5E-42;	-	-	PR00459|Plant ascorbate peroxidase signature|1.1E-5;PR00459|Plant ascorbate peroxidase signature|1.1E-5;PR00459|Plant ascorbate peroxidase signature|1.1E-5;PR00458|Haem peroxidase superfamily signature|9.0E-8;PR00458|Haem peroxidase superfamily signature|9.0E-8;PR00458|Haem peroxidase superfamily signature|9.0E-8;PR00458|Haem peroxidase superfamily signature|9.0E-8;PR00458|Haem peroxidase superfa…
g2580.t1	Dreco_g2580	MRPSNYVAGPAALLWTTLGSLAAFAVPVMAADSDSADGDAANSSPAPKAANAKSSSSSSKPAAAATTDEAAPTTTTKSSKTSKVSITNTGPLATKTPVAVPTITGGGAKDSNAGPIAFPTLTRNVIPTYPAPTVPPTKNAPFMQQSTLPDGTVFICVGAVLGVLGLAILLWRAIISLLLHRSVKRAAMDQHIAGGKTGFPAPPAPFYKYTDQSSTPSFAAGVGAVPAGRGVRRTTRVPVPSATPSQSNLFFSPTAATSNAAGVRASSYLPSGFYASGSGNSNHTNSISLSNLRPDSRGPHLAPARNTLSQSPPDSPQYPARRDTSLMSPSSLNLTALSPGQRAPSAYLEDLLADDPNALPPPQMPHTHGGRSSSGRTDSLPNRIE	0.616	31	0.709	31	0.967	19	0.801	0.759	Y	0.45	SignalP-noTM		extr 24, mito 3	DSDSADGDAANSSPAPKAANAKSSSSSSKPAAAATTDEAAPTTTTKSSKTSKVSITNTGPLATKTPVAVPTITGGGAKDSNAGPIAFPTLTRNVIPTYPAPTVPPTKNAPFMQQSTLPDGTVFICVGAVLGVLGLAILLWRAIISLLLHRSVKRAAMDQHIAGGKTGFPAPPAPFYKYTDQSSTPSFAAGVGAVPAGRGVRRTTRVPVPSATPSQSNLFFSPTAATSNAAGVRASSYLPSGFYASGSGNSNHTNSISLSNLRPDSRGPHLAPARNTLSQSPPDSPQYPARRDTSLMSPSSLNLTALSPGQRAPSAYLEDLLADDPNALPPPQMPHTHGGRSSSGRTDSLPNRIE	354	none	0.41	pero 8, cyto 7, plas 6, mito_pero 6, extr_plas 4.5, cyto_golg 4.5	pero	Cluster03897	-	-	-	PTHR36089:SF1||1.2E-35;PTHR36089||1.2E-35;	-	-	PD039572|MEMBRANE CANDIDA POSSIBLE CSI2 IPF16596 RELATED TRANSMEMBRANE ALBICANS GLABRATA ACL009CP|1.0E-6;	-	-	-	-	-	-	-	-
g2589.t1	Dreco_g2589	MSSSPYSVAVLFLAISRVLFALQVTPGSPCALRCLDSPTGDEFKASDSNTNTSDIACQDREFLTTDKGIKFKTCLECLETSSKVDGGESDLKWYIYSLRYSLGTCLFGQPQPPPNFTLDSACNIDKACRPLRTPLTADRLLPVSNGAFDYCTANDGLFMGPNLTPCILCLQVTEGQAYLSNFLAALEAGCRQNPQDGSILRLRGSVFATKPLTMGEPTADHEQGGRGGFTPSAIAGIVIGVVIISSAAVALCTIHLCRKRWRGTWDGSRYYKFHATPHVSYPPAGRVDRPQANDGDSSNNPPGEKASPYTVFDNYYERVGIDRSDQGGSSHNATGPEPSGSTIPTHQAYNPPTSSRTANQANLHPPVATPAPVHNEPRTNTPDSFAVQAYLNAAEDSAR…	0.533	22	0.684	22	0.954	20	0.883	0.791	Y	0.45	SignalP-noTM		extr 26	QVTPGSPCALRCLDSPTGDEFKASDSNTNTSDIACQDREFLTTDKGIKFKTCLECLETSSKVDGGESDLKWYIYSLRYSLGTCLFGQPQPPPNFTLDSACNIDKACRPLRTPLTADRLLPVSNGAFDYCTANDGLFMGPNLTPCILCLQVTEGQAYLSNFLAALEAGCRQNPQDGSILRLRGSVFATKPLTMGEPTADHEQGGRGGFTPSAIAGIVIGVVIISSAAVALCTIHLCRKRWRGTWDGSRYYKFHATPHVSYPPAGRVDRPQANDGDSSNNPPGEKASPYTVFDNYYERVGIDRSDQGGSSHNATGPEPSGSTIPTHQAYNPPTSSRTANQANLHPPVATPAPVHNEPRTNTPDSFAVQAYLNAAEDSARISPRQPPGPTAKSASQDGKFAK…	494	none	0.65	plas 17, mito 7.5, E.R._mito 5, cyto 4	plas	Cluster05956	-	-	-	-	-	-	-	-	-	-	-	-	-	-	-
g2601.t1	Dreco_g2601	MAASLRLVVTITAILLSNIVSAVRVTSGSPCAGALARCLTCLETSGYAQGDDSDQKAFLYNLRYTLSYCVFGLPNATAQVASNPCITSEACGRLSRALGSGITAPVKENDYAYCDVDSGVVRGPYLESCRQCLRAGGNRNYLSNFLIALDAGCRQMPSGGLVIGLSSSVFANSTVEITQPTAPAPAGQRPSSDGPPLSVGAIIGIVFGSLAFVLLLAACVLVFLRKCKSCAAKRSGLSVRLRRILLGPDRRGDGTVAVQSTERAGQVCHERCIVDEKSPYLGHDDGCPFATPQSVAAYWPPPPTPTSNQRGEGVKPAAIVTTVPAYAAPLVPVTTPAPCNSPDGNTPPLSTISTTSHAPLLKSPRHQP	0.542	23	0.699	23	0.943	14	0.9	0.808	Y	0.45	SignalP-noTM		extr 19, plas 4, E.R. 2	RVTSGSPCAGALARCLTCLETSGYAQGDDSDQKAFLYNLRYTLSYCVFGLPNATAQVASNPCITSEACGRLSRALGSGITAPVKENDYAYCDVDSGVVRGPYLESCRQCLRAGGNRNYLSNFLIALDAGCRQMPSGGLVIGLSSSVFANSTVEITQPTAPAPAGQRPSSDGPPLSVGAIIGIVFGSLAFVLLLAACVLVFLRKCKSCAAKRSGLSVRLRRILLGPDRRGDGTVAVQSTERAGQVCHERCIVDEKSPYLGHDDGCPFATPQSVAAYWPPPPTPTSNQRGEGVKPAAIVTTVPAYAAPLVPVTTPAPCNSPDGNTPPLSTISTTSHAPLLKSPRHQP	345	none	0.12	mito 14, extr 8, plas 3, cyto 3, lyso 3, cyto_plas 3	mito	Cluster13792	-	-	-	-	-	-	-	-	-	-	-	-	-	-	-
g2632.t1	Dreco_g2632	MGKRLFVLGALCGLAQVPLGLADVPDRDCFVGSPPLCNNSLASDTACRGLEVTTIDGWKRMDCDYVVYNVPTEARDTKKWIVIHSGGCDTNTGEIGDFFAVSLGLNLFGLRPCGGFADSLCASRHDYSQCNAFHISWYMPQLHPTYAPYGIGFNPPALVDIFHTPDTHMIFLHEYGSTNETYNWFPANGCNATSAPLYMCLAGIDPDYDSKFAAIKRTLETAFSLAPGFPCKLEVINTMPYSQPQDASVPCTGILREYNDPAKVGGDAKAASNWAWEMPGFMTQAIQLATEVDPNGPLVAAFGRAINIALCQTFDNAKALSCCDGDTLN	0.687	23	0.76	23	0.932	4	0.841	0.804	Y	0.45	SignalP-noTM		extr 24, mito 1, E.R. 1, vacu 1	VPDRDCFVGSPPLCNNSLASDTACRGLEVTTIDGWKRMDCDYVVYNVPTEARDTKKWIVIHSGGCDTNTGEIGDFFAVSLGLNLFGLRPCGGFADSLCASRHDYSQCNAFHISWYMPQLHPTYAPYGIGFNPPALVDIFHTPDTHMIFLHEYGSTNETYNWFPANGCNATSAPLYMCLAGIDPDYDSKFAAIKRTLETAFSLAPGFPCKLEVINTMPYSQPQDASVPCTGILREYNDPAKVGGDAKAASNWAWEMPGFMTQAIQLATEVDPNGPLVAAFGRAINIALCQTFDNAKALSCCDGDTLN	306	none	0.07	extr 15, cyto 7, nucl 5, pero 2, cysk 2	extr	Cluster14462	-	-	-	-	-	-	-	-	-	-	-	-	-	-	-
g2640.t1	Dreco_g2640	MQFLAVACLAAGALAGTIDTPSRVFERDLATVTGVIASVGTKIEALDTAAKAFSGDQAGVLGAAKELISTLEAGTKTVSGSAELTLSDAVALQGPVTALQSKAEKLESNFLAKRSAVEEAGACDAVRKALSDISTNSEALIKAVVGKVPTDAQAIAKTLAEGLTTVLAKAKGDFSADNCKAKAASSSSPATKSATASAKSSSSSAAASSTSAAASSASSSVSSASSSASATSSASSTTVRPSGSGGRSVPQPTGTNSTGVTAGAGAFIAPAGLFVVAVAAMIV	0.631	16	0.708	16	0.857	2	0.767	0.74	Y	0.45	SignalP-noTM		extr 17, plas 5, vacu 3	TIDTPSRVFERDLATVTGVIASVGTKIEALDTAAKAFSGDQAGVLGAAKELISTLEAGTKTVSGSAELTLSDAVALQGPVTALQSKAEKLESNFLAKRSAVEEAGACDAVRKALSDISTNSEALIKAVVGKVPTDAQAIAKTLAEGLTTVLAKAKGDFSADNCKAKAASSSSPATKSATASAKSSSSSAAASSTSAAASSASSSVSSASSSASATSSASSTTVRPSGSGGRSVPQPTGTNSTGVTAGAGAFIAPAGLFVVAVAAMIV	267	none	0.11	extr 24, E.R. 3, plas 2, pero 2	extr	Cluster00341	Q8TG42|MP1_ASPFL|7e-17	-	PF12296|Hydrophobic surface binding protein A|1.9E-22;	-	-	-	-	-	-	-	-	-	-	-	-
g2645.t1	Dreco_g2645	MRLAAFGAALALTRAASALVADIRADTNRDGHVDMEGLTDVPGKHRWTESRGALFLANIGDTNRRCGEELQGDASQVSDEILMACHDAADDTQRAPEFLAPIRTVPLENLDPGAFGFISIVEEHSRNLVRLFRQSGGDWQMLKNDTFLTADDLSRGLELGIDARDTRRPGWDGRATVEFSVTNLTQTSTDTVALRVAPLLTHHHVQKAEKVFTSKLTGIGREFDEARATIDKVERIAREARVPVHRINTNDVWTQDYFEPTYMSMPGPKGSVVVMHVMVSTSNAGRQLGSHRLVFQELRDTGIGAVQYSPVNAWLNLDDFGNLETIPPHVHPVNGKEYPMGRVVAGGVVGKKMPVVLDLFRAQEAQEPLVLDSLWLQVQHLDEFLQFLPANTTRGWSIM…	0.361	19	0.54	19	0.89	1	0.791	0.676	Y	0.45	SignalP-noTM		extr 9, mito 7, cyto 7, cyto_mito 7	VADIRADTNRDGHVDMEGLTDVPGKHRWTESRGALFLANIGDTNRRCGEELQGDASQVSDEILMACHDAADDTQRAPEFLAPIRTVPLENLDPGAFGFISIVEEHSRNLVRLFRQSGGDWQMLKNDTFLTADDLSRGLELGIDARDTRRPGWDGRATVEFSVTNLTQTSTDTVALRVAPLLTHHHVQKAEKVFTSKLTGIGREFDEARATIDKVERIAREARVPVHRINTNDVWTQDYFEPTYMSMPGPKGSVVVMHVMVSTSNAGRQLGSHRLVFQELRDTGIGAVQYSPVNAWLNLDDFGNLETIPPHVHPVNGKEYPMGRVVAGGVVGKKMPVVLDLFRAQEAQEPLVLDSLWLQVQHLDEFLQFLPANTTRGWSIMINDPDAGMELVREARAAGL…	582	488 - RK - 489	0.37	nucl 18.5, cyto_nucl 14.8333, cyto 10, cyto_mito 5.83333	nucl	Cluster00212	Q9Z183|PADI4_MOUSE|6e-32	-	PF03068|Protein-arginine deiminase (PAD)|3.6E-102;	PTHR10837:SF8||3.3E-57;PTHR10837||3.3E-57;PTHR10837||3.3E-57;PTHR10837:SF8||3.3E-57;	SSF55909||1.7E-67;SSF55909||1.7E-67;SSF110083||3.27E-12;	-	-	-	-	-	-	-	-	-	-
g2651.t1	Dreco_g2651	MSLFLGTLVLALICLADAQSFRGEQRARNLTVIHYPGNVTVSFKEPRGVCKTAFDRQKQYTGWVNVPSEHPTNMFFYYVQAREKTDSLTIWLNGGPGASSMYGFFTGAGPCEVVEAGLDRYETVAREWGWDRASNMLFIDQPSQTGFSYDTPTDATISLMNDTITMPPIYKPGHIPPWDLVNGTLSSGNRTNEVNTTEAAALAVWHVMPGFLKTLPKFKLPLNASSLSVSLFAESYGGKYGPIFAEMWQAQNQKLKTGALDRNSVVEIHLSSLGIISGWVDIATEIPGYIRFLHNNTYGIKAASSEEADSMLRNFTAIGGDRDLLAQCAAMARQYDPTDEIGSPINFSTLNFDVYNRFYETGDYARGGNIARLAKLLNSGVRIGLVHGDRDFSCNWFGG…	0.857	19	0.897	19	0.98	9	0.932	0.916	Y	0.45	SignalP-noTM		extr 20, plas 5	SFRGEQRARNLTVIHYPGNVTVSFKEPRGVCKTAFDRQKQYTGWVNVPSEHPTNMFFYYVQAREKTDSLTIWLNGGPGASSMYGFFTGAGPCEVVEAGLDRYETVAREWGWDRASNMLFIDQPSQTGFSYDTPTDATISLMNDTITMPPIYKPGHIPPWDLVNGTLSSGNRTNEVNTTEAAALAVWHVMPGFLKTLPKFKLPLNASSLSVSLFAESYGGKYGPIFAEMWQAQNQKLKTGALDRNSVVEIHLSSLGIISGWVDIATEIPGYIRFLHNNTYGIKAASSEEADSMLRNFTAIGGDRDLLAQCAAMARQYDPTDEIGSPINFSTLNFDVYNRFYETGDYARGGNIARLAKLLNSGVRIGLVHGDRDFSCNWFGGEAVSLSIAQQAEGDYSIKF…	464	none	0.03	cyto 13, mito 11, nucl 6	cyto	Cluster00403	C5FGX1|SCPB_ARTOC|2e-87	901|PHI:901|um01886||5270|Ustilagomaydis|Unaffectedpathogenicity|2e-18	PF00450|Serine carboxypeptidase|1.5E-43;PF00450|Serine carboxypeptidase|2.9E-16;	PTHR11802:SF93||5.9E-149;PTHR11802||5.9E-149;PTHR11802:SF93||5.9E-149;PTHR11802||5.9E-149;	SSF53474||7.77E-73;SSF53474||7.77E-73;	-	-	PS00131|Serine carboxypeptidases, serine active site.|-;PS00560|Serine carboxypeptidases, histidine active site.|-;	-	-	-	G3DSA:3.40.50.1820||1.4E-56;G3DSA:3.40.50.1820||8.7E-27;	-	-	PR00724|Carboxypeptidase C serine protease (S10) family signature|1.6E-9;PR00724|Carboxypeptidase C serine protease (S10) family signature|1.6E-9;PR00724|Carboxypeptidase C serine protease (S10) family signature|1.6E-9;PR00724|Carboxypeptidase C serine protease (S10) family signature|1.6E-9;
g2652.t1	Dreco_g2652	MKWTCIAAILFLSYRGLAVVTPRNGSNATVETVELEATPELMVPRRMKNEASGSRSLYLIDHTTGVERRENLDSKPVVPVLKPPFAHTTFAGTADYNTICDNFPKAHFGGYIGGTNWLRWSWGGYIPKLGAGPAKCERESKEKSLWDYDEIADLSDRVIYKCNPMDGSKFSGQIFHPNNWNVVLQWGDCP	0.624	19	0.748	19	0.923	1	0.889	0.824	Y	0.45	SignalP-noTM		extr 17, mito 2, E.R. 2, golg 2, vacu 2	VTPRNGSNATVETVELEATPELMVPRRMKNEASGSRSLYLIDHTTGVERRENLDSKPVVPVLKPPFAHTTFAGTADYNTICDNFPKAHFGGYIGGTNWLRWSWGGYIPKLGAGPAKCERESKEKSLWDYDEIADLSDRVIYKCNPMDGSKFSGQIFHPNNWNVVLQWGDCP	171	none	0.06	cyto_nucl 15.5, cyto 14, nucl 11, extr 7	cyto_nucl		-	-	-	-	-	-	-	-	-	-	-	-	-	-	-
g2656.t1	Dreco_g2656	MLQQAISLLLLCLDAANGLPRPESSFPRAVSSTRTVFLDDFSGLAVGSLPSRAKWTIDLGTSYPGGPSNWGTGETQVYTNRRTNIAITKYRTLKITPVRERDGTWTSARIETTKAWDFGCPLGQRLRVDAMIKLGADSTSKQLGIWPAFWALGSAYRGNYQNWPSVGEVDILESVNGQNKMHQIVHCDRAPGGVCNEFSGIGRAMDGIRRGLWHTFSWEVDRRPGLREETMTWFIDGRKHWTLKQSDLRSSSAWKALAQNSKMLLLNVAVGGSFPDAVAGHKTPTSRTVGGDGASMEVAWVYAYTSTK	0.559	19	0.657	19	0.87	14	0.77	0.718	Y	0.45	SignalP-noTM		extr 14, cyto 7, mito 5	PRPESSFPRAVSSTRTVFLDDFSGLAVGSLPSRAKWTIDLGTSYPGGPSNWGTGETQVYTNRRTNIAITKYRTLKITPVRERDGTWTSARIETTKAWDFGCPLGQRLRVDAMIKLGADSTSKQLGIWPAFWALGSAYRGNYQNWPSVGEVDILESVNGQNKMHQIVHCDRAPGGVCNEFSGIGRAMDGIRRGLWHTFSWEVDRRPGLREETMTWFIDGRKHWTLKQSDLRSSSAWKALAQNSKMLLLNVAVGGSFPDAVAGHKTPTSRTVGGDGASMEVAWVYAYTSTK	289	none	0.12	mito 16, cyto_nucl 8, E.R._mito 8, cyto 7	mito	Cluster06353	P45798|GUB_RHOMR|1e-07	-	PF00722|Glycosyl hydrolases family 16|7.4E-9;	PTHR10963:SF41||1.4E-45;PTHR10963||1.4E-45;	SSF49899||2.94E-35;	-	-	-	-	-	-	G3DSA:2.60.120.200||3.0E-36;	-	-	-
g2658.t1	Dreco_g2658	MRPSLLAYALPLVVALPANQLGSDQCSEKTPSRTKEWKYDPPKHDGPSTGDWNTWLYNKSIHDNGGWKYDPKIDGPSPGNRKAETGPFTNDRRGGFDVRQQGIPDDRRYQTNNQNTRPAEQVPSGDNARPAEQVPSGDNARPAEQVPSGDNARPAEQVPSGDNAXXXXXXXXXXXXXXXXXXXXXXXXXXXEQVPSGDNTRPAEQVPSGDNTRPAEQVPSGDNTRPAEQVPSGDNTRPAEQVSSGGNTRPAEQVSSGGNTRPAEQVSSGGNTRPAEQVPSDDDGCEADDAAGGIAGKTTSAPLDGQREGAAKLQPAVPSDRQVQEINKNTTTSGEVTGDDGDSCEEESLPVQVPPQNDTPVEDLADDACPDDKDDSTSLPSSTAKPEGQVTAPKDPQGK…	0.219	16	0.418	16	0.884	13	0.806	0.627	Y	0.45	SignalP-noTM		extr 23, mito 2	PANQLGSDQCSEKTPSRTKEWKYDPPKHDGPSTGDWNTWLYNKSIHDNGGWKYDPKIDGPSPGNRKAETGPFTNDRRGGFDVRQQGIPDDRRYQTNNQNTRPAEQVPSGDNARPAEQVPSGDNARPAEQVPSGDNARPAEQVPSGDNAXXXXXXXXXXXXXXXXXXXXXXXXXXXEQVPSGDNTRPAEQVPSGDNTRPAEQVPSGDNTRPAEQVPSGDNTRPAEQVSSGGNTRPAEQVSSGGNTRPAEQVSSGGNTRPAEQVPSDDDGCEADDAAGGIAGKTTSAPLDGQREGAAKLQPAVPSDRQVQEINKNTTTSGEVTGDDGDSCEEESLPVQVPPQNDTPVEDLADDACPDDKDDSTSLPSSTAKPEGQVTAPKDPQGKPQPTSQTKAESGRNAA…	602	none	0.54	cyto_nucl 14.3333, nucl 14, cyto 12.5, cyto_golg 8.16667, pero 3	cyto_nucl		P29294|MYLK_RABIT|6e-11	-	PF00188|Cysteine-rich secretory protein family|8.3E-14;	PTHR10334||3.4E-15;	SSF55797||7.46E-24;	-	-	-	-	SM00198|SCP / Tpx-1 / Ag5 / PR-1 / Sc7 family of extracellular domains.|1.3E-7;	Coil||-;	G3DSA:3.40.33.10||4.3E-23;	-	-	-
g2665.t1	Dreco_g2665	MQFSIVTVLAAVAGIAMAAPGSAIEERASTVCSGALYTNAQCCTTVLLGIVGLGCDSVSGTPTDANDFQTKCGTKEAACCVLPVAGQNVLCKSPE	0.687	19	0.771	19	0.912	4	0.866	0.822	Y	0.45	SignalP-noTM		extr 22, vacu 2, mito 1, cyto 1, plas 1, cyto_mito 1	PGSAIEERASTVCSGALYTNAQCCTTVLLGIVGLGCDSVSGTPTDANDFQTKCGTKEAACCVLPVAGQNVLCKSPE	76	none	0.02	extr 24, cyto 5	extr		P52753|CRYP_CRYPA|4e-15	487|PHI:487|MHP1|O94196|148305|Magnaporthegrisea|Reducedvirulence|4e-15	PF06766|Fungal hydrophobin|9.0E-19;	PTHR42341||3.2E-16;	SSF101751||1.44E-17;	-	-	-	-	-	-	G3DSA:3.20.120.10||7.3E-20;	-	-	-
g2679.t1	Dreco_g2679	MSSATSNSWLSLIIALFLFTRTGQSLQEGISSGEANSYGSRKSTTWPTTLYDGVVAKNTISAIAADKHLRQTYMAILSMCIDASRNLAEIYGVPELDAISDDLDRHLRQVNVNTEVEYRLDLRKHRSTTGTDEDINLAKRQGLIGGLLSGLVGGGNGGEQSAAGPGGKGIGGIISNAARNVFGNVLNMSGPALVRAGFFGGVGAGEGAAQGLDLLSADLSKSAGATVAEENGMQKKGLNPMIEQAAMALTATAVKALRMSNIFQLPPLGPVAAAAGSGLGSGAASGLNLTLRNPGPPANASDLASIAGSFAFGASKSLAENVNIGGASLTSLLPNDLGPAALEIGRGLGGGAASGLKLGSNTNVPPPPPASQSDVPGIARTFSFGLSEAVARSIDKNSL…	0.771	26	0.831	26	0.951	7	0.895	0.865	Y	0.45	SignalP-noTM		extr 22, E.R. 3	QEGISSGEANSYGSRKSTTWPTTLYDGVVAKNTISAIAADKHLRQTYMAILSMCIDASRNLAEIYGVPELDAISDDLDRHLRQVNVNTEVEYRLDLRKHRSTTGTDEDINLAKRQGLIGGLLSGLVGGGNGGEQSAAGPGGKGIGGIISNAARNVFGNVLNMSGPALVRAGFFGGVGAGEGAAQGLDLLSADLSKSAGATVAEENGMQKKGLNPMIEQAAMALTATAVKALRMSNIFQLPPLGPVAAAAGSGLGSGAASGLNLTLRNPGPPANASDLASIAGSFAFGASKSLAENVNIGGASLTSLLPNDLGPAALEIGRGLGGGAASGLKLGSNTNVPPPPPASQSDVPGIARTFSFGLSEAVARSIDKNSLSLGSVVPNLGDTVLNIGNGLGTGAAA…	1468	none	0.37	plas 30	plas	Cluster03202	-	-	PF08386|TAP-like protein|2.4E-11;	-	-	-	-	-	-	-	-	-	-	-	-
g2686.t1	Dreco_g2686	MRLNHPLRSCLFLGTIFPYLGSTKPEPASADGLVEASIGALKGKLDTHKEFDYIVVGGGTGGNAVGTRLAEAGFKVAIVEAGAFYEIAKPVLGTTPAGDIIGIGWNMLDAVPTVDWTFQTEPQAGANNRKFHYAQGKCVGGSSALNFMIYHRGTTGTYDQWADAVGDDSYRLDQFQTFFKRGHTFTPPDLQKRKSNASTPYDASDYLPAGQGGPVQVGYSNWVSSWSTWLEQGLKAVGMQRTTDFNKGKLLGYHYTQTTIRNSDATRSSSAQYIYKAMADKVGSLKVFTLTQATKILFDSEKKATGVEVSSLGIKYTLKASKEVIVSGGAFKSPQLLMVSGVGPKDTLDKFKIPVVAALPGVGQNMWDHIFFGPSYAVKFPTIDDILLNPLSLAKALAQ…	0.29	23	0.396	23	0.731	21	0.541	0.474	Y	0.45	SignalP-noTM		extr 16, mito 8, cyto 1.5, cyto_nucl 1.5	KPEPASADGLVEASIGALKGKLDTHKEFDYIVVGGGTGGNAVGTRLAEAGFKVAIVEAGAFYEIAKPVLGTTPAGDIIGIGWNMLDAVPTVDWTFQTEPQAGANNRKFHYAQGKCVGGSSALNFMIYHRGTTGTYDQWADAVGDDSYRLDQFQTFFKRGHTFTPPDLQKRKSNASTPYDASDYLPAGQGGPVQVGYSNWVSSWSTWLEQGLKAVGMQRTTDFNKGKLLGYHYTQTTIRNSDATRSSSAQYIYKAMADKVGSLKVFTLTQATKILFDSEKKATGVEVSSLGIKYTLKASKEVIVSGGAFKSPQLLMVSGVGPKDTLDKFKIPVVAALPGVGQNMWDHIFFGPSYAVKFPTIDDILLNPLSLAKALAQYVFSHDGVLSSNIIEFVGWEKLP…	608	none	0.14	cyto_nucl 15, nucl 13.5, cyto 13.5, cysk 3	cyto_nucl	Cluster01018	Q12062|AFLK_ASPPA|1e-127	922|PHI:922|um03615||5270|Ustilagomaydis|Unaffectedpathogenicity|2e-56	PF00732|GMC oxidoreductase|1.1E-48;PF05199|GMC oxidoreductase|4.3E-39;	PTHR11552||3.4E-283;PTHR11552:SF138||3.4E-283;	SSF51905||6.85E-70;SSF51905||6.85E-70;SSF54373||1.96E-38;	-	-	PS00623|GMC oxidoreductases signature 1.|-;PS00624|GMC oxidoreductases signature 2.|-;	-	-	-	G3DSA:3.50.50.60||4.7E-101;G3DSA:3.50.50.60||4.7E-101;G3DSA:3.50.50.60||4.7E-101;	-	PIRSF000137||5.0E-138;	-
g2687.t1	Dreco_g2687	MHTFLGTALLAVFGTVQAQFVQPKDPRARNLTVKHSPGDVTISFKEPHGVCKTALPTQKQYSGWVDIPGDYPTNLFFYYVGARNSTDTLTVWFTGGPGASSMYEFFVANGPCEVVERGLNEYETVAREWGWDRASNMLFIDQPNQVGFSYDTPTDGTLAMLNGSVIIPPVSDPDAIPAWGLLNGTFSSGNPKNTVNNTQSAAYAAWHVIQRFYNDVPLDSPRSNASFGVNLFTSSYGGVYGPIFAETWEAQNKERNRLNGNIDPDSTVDLHIKSLGIVNGCIDLVTEEPQYIHFATNNTYGVHPFSSNETQSFLDKIEAADGCKALATRYDVAAPEYGAFPPVQFVDYLNQGNILDEIESPVNFTLANDMVFNQFRATGDGARGETISATGLEARQFR	0.849	19	0.854	19	0.912	2	0.852	0.853	Y	0.45	SignalP-noTM		extr 25	FVQPKDPRARNLTVKHSPGDVTISFKEPHGVCKTALPTQKQYSGWVDIPGDYPTNLFFYYVGARNSTDTLTVWFTGGPGASSMYEFFVANGPCEVVERGLNEYETVAREWGWDRASNMLFIDQPNQVGFSYDTPTDGTLAMLNGSVIIPPVSDPDAIPAWGLLNGTFSSGNPKNTVNNTQSAAYAAWHVIQRFYNDVPLDSPRSNASFGVNLFTSSYGGVYGPIFAETWEAQNKERNRLNGNIDPDSTVDLHIKSLGIVNGCIDLVTEEPQYIHFATNNTYGVHPFSSNETQSFLDKIEAADGCKALATRYDVAAPEYGAFPPVQFVDYLNQGNILDEIESPVNFTLANDMVFNQFRATGDGARGETISATGLEARQFR	379	none	0	cyto_nucl 15, cyto 13, nucl 9, extr 5, pero 4	cyto_nucl	Cluster00403	Q5J6J1|SPCA_TRIRU|1e-58	901|PHI:901|um01886||5270|Ustilagomaydis|Unaffectedpathogenicity|3e-11	PF00450|Serine carboxypeptidase|1.5E-35;	PTHR11802:SF93||2.3E-79;PTHR11802||2.3E-79;PTHR11802:SF93||2.3E-79;PTHR11802||2.3E-79;	SSF53474||2.14E-43;SSF53474||2.14E-43;	-	-	-	-	-	-	G3DSA:3.40.50.1820||1.2E-51;	-	-	-
g2696.t1	Dreco_g2696	MVCISLLFLLAKIALTTLADNSTAATDDESVSYIIEAADGVDLGTVKNVVAGAATVVKEFNYKVFRGYTVVVSQSTKAIRLAEEWEKNPAVKRCQRVRQYQTPKSPTTSMGTDKKEHTVKRRHANVADVNSPLMMAQIDMLHAKGYTGNGSRIAIVDSGVDYYHDAFGGCFRKQDCLVSFGYDVVDGDKDPMDSCNGHGTSVASIIAAQPNNRMGFTGVAPKATLGAYRAVGCNRAMSTDAIIEAYSRAFEDDAHIIVGSFSTPEGFSDSIESSLVRKIVQKGVPCIFAAGNSGKTGPFDGNSPGDTEGATSVGFSDNILTPTPMFKAEYRVDGDEHVDFNYLPHIPSAWHGVALDVFATSIVTSRSCKLPRELNLTGARIIAAGAVAKDTGDRWIELI…	0.62	20	0.766	20	0.985	11	0.944	0.862	Y	0.45	SignalP-noTM		extr 26	NSTAATDDESVSYIIEAADGVDLGTVKNVVAGAATVVKEFNYKVFRGYTVVVSQSTKAIRLAEEWEKNPAVKRCQRVRQYQTPKSPTTSMGTDKKEHTVKRRHANVADVNSPLMMAQIDMLHAKGYTGNGSRIAIVDSGVDYYHDAFGGCFRKQDCLVSFGYDVVDGDKDPMDSCNGHGTSVASIIAAQPNNRMGFTGVAPKATLGAYRAVGCNRAMSTDAIIEAYSRAFEDDAHIIVGSFSTPEGFSDSIESSLVRKIVQKGVPCIFAAGNSGKTGPFDGNSPGDTEGATSVGFSDNILTPTPMFKAEYRVDGDEHVDFNYLPHIPSAWHGVALDVFATSIVTSRSCKLPRELNLTGARIIAAGAVAKDTGDRWIELIRKGRTVTLKMASPSTWNQRI…	613	none	0.17	nucl 17, cyto_nucl 12.5, cyto 6, cysk 6	nucl	Cluster00057	P29141|SUBV_BACSU|1e-20	-	PF06280|Fn3-like domain|2.7E-7;PF00082|Subtilase family|4.6E-41;	PTHR10795||1.1E-59;PTHR10795:SF363||1.1E-59;	SSF52743||1.07E-65;SSF52743||1.07E-65;	-	-	PS00137|Serine proteases, subtilase family, histidine active site.|-;PS00136|Serine proteases, subtilase family, aspartic acid active site.|-;	-	-	Coil||-;	G3DSA:3.40.50.200||1.9E-68;G3DSA:3.40.50.200||1.9E-68;	-	-	PR00723|Subtilisin serine protease family (S8) signature|3.5E-14;PR00723|Subtilisin serine protease family (S8) signature|3.5E-14;PR00723|Subtilisin serine protease family (S8) signature|3.5E-14;
g2705.t1	Dreco_g2705	MPLAGLLSLALVAVAAAHSVLTYPGWRGNNLITNETFPYGMQWIYPCGGVPTTKNRTYWPTTGGAVSFQPGWFRGHSLALIYVNLGFGTDGPDGGPPNMSNPMVHPLQIIGPTNNPYPGTVCLPQVPLPANASVKAGDKATIQVVELAQHGAALYSCVDIIFADPGDPRIPEVNETNCFNSTEIGFASMYTITTKNPGSSNYAKSGAVRSIESLSWLGFLSLLLGAFWALP	0.754	18	0.849	18	0.977	10	0.956	0.907	Y	0.45	SignalP-noTM		extr 14, plas 12	SVLTYPGWRGNNLITNETFPYGMQWIYPCGGVPTTKNRTYWPTTGGAVSFQPGWFRGHSLALIYVNLGFGTDGPDGGPPNMSNPMVHPLQIIGPTNNPYPGTVCLPQVPLPANASVKAGDKATIQVVELAQHGAALYSCVDIIFADPGDPRIPEVNETNCFNSTEIGFASMYTITTKNPGSSNYAKSGAVRSIESLSWLGFLSLLLGAFWALP	213	none	0	plas 18.5, extr_plas 11, mito 4, extr 2.5, nucl 2, cyto 2, E.R. 2, cyto_nucl 2, mito_pero 2	plas	Cluster06373	-	-	-	PTHR34992:SF3||5.5E-93;PTHR34992||5.5E-93;	-	-	-	-	-	-	-	-	-	-	-
g2724.t1	Dreco_g2724	MTGVILATQRRSAFTVCLLVVALLATSVLALQPATALLPTNATSCYQASAVKNGCMYLEESAYYQCVCGHNDSQFLKDNAKCLGATDQVDLPVTYQYLADVCDRFKVPVNITRAGFFEAAGVADPDVDPVADKDASRDAGRGTDDKPEGISTGTKIAIAVGAIVGAAVALSGLILLLCRRKARRQRSEAVEPKSWRYEEISPSATALPRAWPTPTEPSPPRPSMPPRPLPPAELAASVPPPPEYTPSPVSGVNTLPTQTRTASPQTPPQTPPQVAAPPTAWTYVESAISPLTMVSQAPPLGEKTTSPCRQNGYRSYELEDTSIAKPEPVRQSREGMVEVANFI	0.835	31	0.897	31	0.989	21	0.936	0.918	Y	0.45	SignalP-noTM		extr 13, plas 5, E.R. 4, mito 1, cyto 1, pero 1, golg 1, vacu 1, cyto_mito 1, cyto_pero 1	QPATALLPTNATSCYQASAVKNGCMYLEESAYYQCVCGHNDSQFLKDNAKCLGATDQVDLPVTYQYLADVCDRFKVPVNITRAGFFEAAGVADPDVDPVADKDASRDAGRGTDDKPEGISTGTKIAIAVGAIVGAAVALSGLILLLCRRKARRQRSEAVEPKSWRYEEISPSATALPRAWPTPTEPSPPRPSMPPRPLPPAELAASVPPPPEYTPSPVSGVNTLPTQTRTASPQTPPQTPPQVAAPPTAWTYVESAISPLTMVSQAPPLGEKTTSPCRQNGYRSYELEDTSIAKPEPVRQSREGMVEVANFI	312	none	0.49	cyto 13.5, cyto_nucl 10, nucl 5.5, mito 5, plas 4, mito_pero 4	cyto		-	-	-	-	-	-	-	-	-	-	-	-	-	-	-
g2729.t1	Dreco_g2729	MNLLLVVLYASRLLVAAAAEAPPALTPEAIEADIEWTGLINVLENLSTIANDHGGNRAFGTSGYLASFNYVLQRVQDGISKYFDTTVQEFTHTYYQLKNISLTGPTGDNTPVISPTHNMATPPEGLTALLMNIPVDDERGSGCFGDQWNGTDASGKFVLIKHGKCYIDEKVQLAKNNGALGVIVYSDKAGQMVGDYLDRDTVVKPLPVGVVGLDTGLRWSQQVTDGQQLNVSLFVDTLYEPRKSWNIISETKSGDSNNVVFLGAHLDSVPAGPGINDNGSGVAALLEMAKHFCKYTGFKNKVRFAWWGAEEPAIVGSRHYASKLNETEADQIRLYINLDMIGSPRPNYTVEANNDADMAGAAPLVEHLLKNGFPAKIVKYDANSSDYSGFVKLGIPAAG…	0.411	19	0.62	19	0.967	10	0.932	0.789	Y	0.45	SignalP-noTM		extr 27	EAPPALTPEAIEADIEWTGLINVLENLSTIANDHGGNRAFGTSGYLASFNYVLQRVQDGISKYFDTTVQEFTHTYYQLKNISLTGPTGDNTPVISPTHNMATPPEGLTALLMNIPVDDERGSGCFGDQWNGTDASGKFVLIKHGKCYIDEKVQLAKNNGALGVIVYSDKAGQMVGDYLDRDTVVKPLPVGVVGLDTGLRWSQQVTDGQQLNVSLFVDTLYEPRKSWNIISETKSGDSNNVVFLGAHLDSVPAGPGINDNGSGVAALLEMAKHFCKYTGFKNKVRFAWWGAEEPAIVGSRHYASKLNETEADQIRLYINLDMIGSPRPNYTVEANNDADMAGAAPLVEHLLKNGFPAKIVKYDANSSDYSGFVKLGIPAAGIYTGGLLPVDNPPDACYHK…	444	none	0.07	cyto 16, cyto_nucl 12.5, cysk 11, nucl 5	cyto	Cluster00271	D4D3D1|LAP2_TRIVH|2e-60	-	PF02225|PA domain|6.8E-11;PF04389|Peptidase family M28|7.6E-42;	PTHR12147||4.1E-83;PTHR12147:SF19||4.1E-83;	SSF52025||1.2E-13;SSF53187||4.98E-54;SSF53187||4.98E-54;	-	-	-	-	-	-	G3DSA:3.50.30.30||1.5E-18;G3DSA:3.40.630.10||2.9E-58;G3DSA:3.40.630.10||2.9E-58;	-	-	-
g2771.t1	Dreco_g2771	MKITQISAVAALFVISASAEYIFGGGPPRSDAPDNVDPVEWCQKNIDVPRRCTSGDAPCEDVCKFCSFGKAPIKQGRCEFRGWGHLWSEVTHGPKCVCYDPWTE	0.713	20	0.72	20	0.841	16	0.732	0.727	Y	0.45	SignalP-noTM		extr 13, cyto 4.5, cyto_nucl 3.5, mito 3, pero 3, nucl 1.5	YIFGGGPPRSDAPDNVDPVEWCQKNIDVPRRCTSGDAPCEDVCKFCSFGKAPIKQGRCEFRGWGHLWSEVTHGPKCVCYDPWTE	84	none	0.02	extr 27, mito 3	extr		-	-	-	-	-	-	-	-	-	-	-	-	-	-	-
g2819.t1	Dreco_g2819	MNGFWFSRVLWAAFLLLFASECAGHLVPSDAVPTISKRTPGLGGSKPQRKDSDVQSVWRGETGRTPAEVEQDGGIYSRGFQKSLANIKFSDDEIEAGSSLFLHTKGGTRHYTQFVSTTTDLFTALFFAAGHDPNKPGYIYKIRADPKLVDVNKSLGRHSPFADQAEFAAVGFIPFDQIEGWRVFSVKDLSKKLEKDIRAGRLDDFYKGFHQNDKFNPEYRSLRSSGPQPQLAGFPKDEVAWKETPWNAFAGQAASNNLADFWQKICGSKLIQMSFNKNTKKKVDACEMMRFGKGTVGPAPKKDPTKPKAPKGTSRGKSSTKQASKTSGKPSRKTAGKPSRKTAGKTSRKSIGKTSRKGFGGEKA	0.785	25	0.869	25	0.987	16	0.961	0.919	Y	0.45	SignalP-noTM		extr 21, mito 6	LVPSDAVPTISKRTPGLGGSKPQRKDSDVQSVWRGETGRTPAEVEQDGGIYSRGFQKSLANIKFSDDEIEAGSSLFLHTKGGTRHYTQFVSTTTDLFTALFFAAGHDPNKPGYIYKIRADPKLVDVNKSLGRHSPFADQAEFAAVGFIPFDQIEGWRVFSVKDLSKKLEKDIRAGRLDDFYKGFHQNDKFNPEYRSLRSSGPQPQLAGFPKDEVAWKETPWNAFAGQAASNNLADFWQKICGSKLIQMSFNKNTKKKVDACEMMRFGKGTVGPAPKKDPTKPKAPKGTSRGKSSTKQASKTSGKPSRKTAGKPSRKTAGKTSRKSIGKTSRKGFGGEKA	339	298 - PAPKKDPTKPKAPKGTSRGKSSTKQASKTSGKPSRKTAGKPSRKTAGKTSRKSIGKTSRKGFGGEKA - 364	0.51	cyto 18, nucl 5, mito 5, mito_nucl 5	cyto	Cluster13585	P13810|E2AA_ECOLX|2e-17	698|PHI:698|CtxA|AAF94614|243277|Vibriocholerae|Reducedvirulence|2e-15	PF01375|Heat-labile enterotoxin alpha chain|1.5E-33;	-	SSF56399||1.58E-32;	-	-	-	-	-	-	G3DSA:3.90.210.10||1.8E-59;	-	-	PR00771|Heat-labile enterotoxin A chain signature|1.3E-6;PR00771|Heat-labile enterotoxin A chain signature|1.3E-6;PR00771|Heat-labile enterotoxin A chain signature|1.3E-6;
g2885.t1	Dreco_g2885	MHPTAWLSFALVGLAVATPHGQHEHMEDSALDKTPLPSPLNSPTPSITGTCRGHGNHWHCPDGVPEPTTPPAQKTTTQGEMTGHGHAEPTGTSCTPHHGHWDCPSGVPEPTTPPAQDTTAQGEDTDHDHAEPTGTSCTPHHGHWDCPSGVPEPTTPPAQDATAQGEKTGHGHAEPTGTSCTPHGDHWHCPSGVSRPATPPATFGSQTTSRNSSSTFASPSVTASPAAAAAGGRPAAPFFAAAAFFVGAIIL	0.581	18	0.706	18	0.899	2	0.852	0.785	Y	0.45	SignalP-noTM		extr 26	PHGQHEHMEDSALDKTPLPSPLNSPTPSITGTCRGHGNHWHCPDGVPEPTTPPAQKTTTQGEMTGHGHAEPTGTSCTPHHGHWDCPSGVPEPTTPPAQDTTAQGEDTDHDHAEPTGTSCTPHHGHWDCPSGVPEPTTPPAQDATAQGEKTGHGHAEPTGTSCTPHGDHWHCPSGVSRPATPPATFGSQTTSRNSSSTFASPSVTASPAAAAAGGRPAAPFFAAAAFFVGAIIL	233	none	0.13	plas 27, cyto 2	plas	Cluster12432	-	-	-	-	-	-	-	-	-	-	-	-	-	-	-
g2889.t1	Dreco_g2889	MKALDLVVVLASAAAVAATPIQTRALGGVLICTGPNATGTCMHKVVSLNVCQQLEAPFYRNASTFAPDREPFACSPRAFDCQGICRSPTGCTFGAVDFAYEHKFNLSAIGWNTIISSFDCFLKE	0.634	19	0.72	19	0.872	2	0.807	0.767	Y	0.45	SignalP-noTM		extr 22, E.R. 2, mito 1, plas 1, pero 1	PIQTRALGGVLICTGPNATGTCMHKVVSLNVCQQLEAPFYRNASTFAPDREPFACSPRAFDCQGICRSPTGCTFGAVDFAYEHKFNLSAIGWNTIISSFDCFLKE	105	none	0.02	cyto 12.5, cyto_nucl 9.83333, cyto_pero 7.66667, extr 7, mito 6, nucl 5	cyto	Cluster05062	-	-	-	-	-	-	-	-	-	-	-	-	-	-	-
g2897.t1	Dreco_g2897	MGFRIALLALAASVLGKQLDGRGHDEYKPHTTYTTTTVCPITSTITSEGTTYCVTDLTTSTITVTQCYGCSGGLTVVPGPTVTRGTTTVVKVTYTTVCPVTETITGPTYTYLTTRTTTSSIVTYVPTTIYESVPGPEKTHTATDVIYTTITSLCPVTEVTTIAGQQRTITYTTTSLIVTVVPTTFHETLRKPDRTATATDVEYSTITSLCPVTQTKTLAGTEYTVTYTTTKLIKTKILKTIEETIKQSDRTVTATEVQYSTYTTEVPVTKVTTVSGKEITKTYTTTKVIKTAVQTTIYETARQPDVTETATDVQYSTITSLCPVTIVTTIGGKARTITYTTTKLIKTVVPTTIRQTVEKPDVTATATDVQYQTMTHLQAVTKITTIGGEERTITYTKTK…	0.558	17	0.703	17	0.929	1	0.871	0.794	Y	0.45	SignalP-noTM		extr 19, cyto 4, mito 3	QLDGRGHDEYKPHTTYTTTTVCPITSTITSEGTTYCVTDLTTSTITVTQCYGCSGGLTVVPGPTVTRGTTTVVKVTYTTVCPVTETITGPTYTYLTTRTTTSSIVTYVPTTIYESVPGPEKTHTATDVIYTTITSLCPVTEVTTIAGQQRTITYTTTSLIVTVVPTTFHETLRKPDRTATATDVEYSTITSLCPVTQTKTLAGTEYTVTYTTTKLIKTKILKTIEETIKQSDRTVTATEVQYSTYTTEVPVTKVTTVSGKEITKTYTTTKVIKTAVQTTIYETARQPDVTETATDVQYSTITSLCPVTIVTTIGGKARTITYTTTKLIKTVVPTTIRQTVEKPDVTATATDVQYQTMTHLQAVTKITTIGGEERTITYTKTKTVKVHLPYTVVQTVSVP…	513	none	0.13	cyto 9.5, cyto_mito 8.83333, cyto_plas 8.83333, plas 8, mito 7	cyto	Cluster02732	-	-	-	-	-	-	-	-	-	-	-	-	-	-	-
g2911.t1	Dreco_g2911	MRFSTVALMAVAAEASNFTTTTDYSTQLVTVTACADDVTDCPVSKTTSVSSSAVPMTTSIKYETKIHTVTSCPETVTDCPARSTMVSTETIATYTTVCPVASVSPSSVPRPNYSNSTMPSGHGPCGGKPCPPSPVAPAEPKKLNLNTGAALPTSESACPSFSVTSVTKTYTTVLSSVEVSTIAVPCPTETEVVAPIGTASPSAPVSNKTAPGVGNAPLTAGASSFAGSALFAVAAGLAAFVLA	0.229	16	0.369	16	0.685	2	0.564	0.474	Y	0.45	SignalP-noTM		extr 21, mito 3, cyto 1, plas 1, vacu 1	NFTTTTDYSTQLVTVTACADDVTDCPVSKTTSVSSSAVPMTTSIKYETKIHTVTSCPETVTDCPARSTMVSTETIATYTTVCPVASVSPSSVPRPNYSNSTMPSGHGPCGGKPCPPSPVAPAEPKKLNLNTGAALPTSESACPSFSVTSVTKTYTTVLSSVEVSTIAVPCPTETEVVAPIGTASPSAPVSNKTAPGVGNAPLTAGASSFAGSALFAVAAGLAAFVLA	227	none	0.05	extr 18, plas 6, mito 4, nucl 2, E.R._mito 2, mito_pero 2	extr	Cluster09557	-	-	-	-	-	-	-	-	PS51257|Prokaryotic membrane lipoprotein lipid attachment site profile.|5.0;	-	-	-	-	-	-
g2948.t1	Dreco_g2948	MRNAVANIGLALLAGLSPRGGAAAMMLETPAAAHFEASPWFDWGWHGAYPRQSYRSFGAQSPKPNLLRRSDECDGSGLVFVEPRGVYVEAPGPVILDNDGNLVWTETRWGQAVDLKVQRYRNHDYITFWHGTEGAPNADGGYVMLDQSYQIYKTIRPVGNFDGDAHEFRITADGTALLSIRKEARAPATGDAIYDSIFQEIDIDSGALLFEWHASHHFAVSESKARPAPDGGPVDFFHLNSIDKGPDGNYLVSSEHLGAVACISRGDGHVVWQLGGAHNDFEDRSEGEATAFVSNRHATWLGNSTTLTLLDSGAAGGSRGKMIELDVVGRTATLVGAYREPRGLNAHGGSVQVLPGDNVLVGWEGAAGYTEFSPDGDVLCDTRLAPRLFANLGWVTNYR…	0.368	24	0.472	24	0.722	21	0.602	0.542	Y	0.45	SignalP-noTM		extr 20, mito 4, plas 1, E.R. 1, golg 1	MMLETPAAAHFEASPWFDWGWHGAYPRQSYRSFGAQSPKPNLLRRSDECDGSGLVFVEPRGVYVEAPGPVILDNDGNLVWTETRWGQAVDLKVQRYRNHDYITFWHGTEGAPNADGGYVMLDQSYQIYKTIRPVGNFDGDAHEFRITADGTALLSIRKEARAPATGDAIYDSIFQEIDIDSGALLFEWHASHHFAVSESKARPAPDGGPVDFFHLNSIDKGPDGNYLVSSEHLGAVACISRGDGHVVWQLGGAHNDFEDRSEGEATAFVSNRHATWLGNSTTLTLLDSGAAGGSRGKMIELDVVGRTATLVGAYREPRGLNAHGGSVQVLPGDNVLVGWEGAAGYTEFSPDGDVLCDTRLAPRLFANLGWVTNYRASKHRWVGRPSTVPDLAMRPDEDA…	540	none	0.2	cyto 11.5, cyto_nucl 9, mito 6, nucl 5.5, pero 4, plas 3	cyto	Cluster03389	-	-	PF14269|Arylsulfotransferase (ASST)|5.1E-25;	PTHR35340||1.3E-105;PTHR35340:SF1||1.3E-105;	SSF50998||2.35E-5;	-	-	-	-	-	-	-	-	-	-
g2960.t1	Dreco_g2960	MRFTIALALGASQMASALSNHTTSPTPTGEPRPTPSLPTRVGPFRLYGCAVSADGFPGFRKAASRADMDLQICAATCKTFYFGVFDTDCYCGDSISRDNISTKPEMAQCNIRCPGMFSEACGGRPHLLQRREVDPRNAALSLYERVDVEPPTTIHTTHTSTGVMTACPPGKTDCPPRHHGDITINIHNTIICIGDFCAAEINCPTCKRQRVICKDDDDCHTEECEDDDNHWSLVKCTDDHCRYPKCKGDECKRKIVCKDGKCKKDTCHEDECEKKFVCKDDDCKHEKCHGDECYKKWVCKNDDCKVKPVCDDECVAPPAKKKAEVKPVAPKVTQAYDHDVVVVAGSGKVAVIYNILAAAVGLALML	0.385	18	0.477	18	0.705	14	0.596	0.542	Y	0.45	SignalP-noTM		extr 8, mito 6, E.R. 5, cyto 3.5, cyto_nucl 3.5, nucl 2.5	SNHTTSPTPTGEPRPTPSLPTRVGPFRLYGCAVSADGFPGFRKAASRADMDLQICAATCKTFYFGVFDTDCYCGDSISRDNISTKPEMAQCNIRCPGMFSEACGGRPHLLQRREVDPRNAALSLYERVDVEPPTTIHTTHTSTGVMTACPPGKTDCPPRHHGDITINIHNTIICIGDFCAAEINCPTCKRQRVICKDDDDCHTEECEDDDNHWSLVKCTDDHCRYPKCKGDECKRKIVCKDGKCKKDTCHEDECEKKFVCKDDDCKHEKCHGDECYKKWVCKNDDCKVKPVCDDECVAPPAKKKAEVKPVAPKVTQAYDHDVVVVAGSGKVAVIYNILAAAVGLALML	348	none	0.28	nucl 26, mito 6	nucl	Cluster01519	-	-	-	-	-	-	-	PS00028|Zinc finger C2H2 type domain signature.|-;	PS51212|WSC domain profile.|7.664;	SM00321|present in yeast cell wall integrity and stress response component proteins|0.0019;	-	-	-	-	-
g2974.t1	Dreco_g2974	MNINKMIFGLVAVLASIGYAAGRIPVFPAFAFEGGLAEKEEMVQVAADVPVNRNNHSSYNYTRNNNTGHHYTSHNDSYYNNSSNDYASNHKSHRNHDARNNYSRYNCTDYYNATRDNNASNYNASYNHTDRNYNPSHCNQYRNNYPSHYNQYRNNYPSHHNTTGHYNSRYYYSSRDYNPSNDYPSYYYSTRNYYPGKNYNPSHYNQYRNNYPSHYNTTGHYNSSYNNSSRNNYSGNYYPSYNHTDRNYNPSHYNQYRNNYPSHYNQYRNNYPSHHNTTGHYNSSYNNSSRNYYSGNYYPSYNHTDRNYNPSHYNQHRNNYPSHYNQYRNNYPSHHNTTGHYNSSYYYSSRDYNPSYNNSSRNYYSGNYYPSYNHTARNYNPSHYNQYRNDYPSHHNTTE…	0.686	23	0.716	23	0.854	6	0.747	0.733	Y	0.45	SignalP-noTM		extr 24, golg 2	IPVFPAFAFEGGLAEKEEMVQVAADVPVNRNNHSSYNYTRNNNTGHHYTSHNDSYYNNSSNDYASNHKSHRNHDARNNYSRYNCTDYYNATRDNNASNYNASYNHTDRNYNPSHCNQYRNNYPSHYNQYRNNYPSHHNTTGHYNSRYYYSSRDYNPSNDYPSYYYSTRNYYPGKNYNPSHYNQYRNNYPSHYNTTGHYNSSYNNSSRNNYSGNYYPSYNHTDRNYNPSHYNQYRNNYPSHYNQYRNNYPSHHNTTGHYNSSYNNSSRNYYSGNYYPSYNHTDRNYNPSHYNQHRNNYPSHYNQYRNNYPSHHNTTGHYNSSYYYSSRDYNPSYNNSSRNYYSGNYYPSYNHTARNYNPSHYNQYRNDYPSHHNTTEHYNSSYYYSSRNYNPSNYYPYSD…	1332	none	0.45	nucl 18.5, cyto_nucl 15.5, cyto 9.5	nucl		-	-	-	-	-	-	-	-	-	-	-	-	-	-	-
g2994.t1	Dreco_g2994	MPTGCRFQTDILSTALSALAALAALAAVDASSHGPRPQVAAPAHGAPDSSWACSVPVVEKLTVKAVGDKFLFAYLTLRDGPPMPLEPPGFVDLHAPSRANSTAAGMASWTMPYRADTVESNRDSGFYWQDMEGSNDMQNDFFGQFVDFGGDDASTATPGDAFNDLGTMSAGPEPLFVMDDQQQQQGAESTASSGASTADEFDFLSNSSHLAPSALATSYEINPKMVTLGPESHDEEVEAQHYGYLGRGSMSETDLTRLESISLHSPQKTKASVSDPSSPTPPNTIATARKPKKFVEALSSTIRKATTLRKTRKALPEQKVRSPSLEQQQQQQQRQLQSPLKIPKQRRGRPNPSAHGLPQSPPVQQQNPGGAQFIHGYCEDPFNEGAPPPMPAAQYYNQP…	0.473	31	0.61	31	0.943	19	0.775	0.699	Y	0.45	SignalP-noTM		extr 17, nucl 4, plas 4	SHGPRPQVAAPAHGAPDSSWACSVPVVEKLTVKAVGDKFLFAYLTLRDGPPMPLEPPGFVDLHAPSRANSTAAGMASWTMPYRADTVESNRDSGFYWQDMEGSNDMQNDFFGQFVDFGGDDASTATPGDAFNDLGTMSAGPEPLFVMDDQQQQQGAESTASSGASTADEFDFLSNSSHLAPSALATSYEINPKMVTLGPESHDEEVEAQHYGYLGRGSMSETDLTRLESISLHSPQKTKASVSDPSSPTPPNTIATARKPKKFVEALSSTIRKATTLRKTRKALPEQKVRSPSLEQQQQQQQRQLQSPLKIPKQRRGRPNPSAHGLPQSPPVQQQNPGGAQFIHGYCEDPFNEGAPPPMPAAQYYNQPGIHTPIESPGVKLEQARFPNGSAAPGVQVPP…	678	669 - TKARREKEAQDRRRR - 683	0.92	nucl 27.5, cyto_nucl 16	nucl	Cluster07566	-	-	-	PTHR22934||2.9E-31;PTHR22934:SF23||2.9E-31;	-	-	-	-	-	-	-	-	-	-	-
g3003.t1	Dreco_g3003	MAPLSSILLLQTSFLVLASHAAASQQQKQQQLLAAIKKLSPDSNEKLFPEHLSFAPLTVFPREAAQFFAYDNDDDEDLQLNETARFFLPAFARHQDDGEPGLLRRAAEALTLLQRQASCPVGMKSCADQGAPNKCCQEGTYCAGVADANVGQVACCPLGTGCTGGVGSCPSDATSCSSELGGGCCIPGFVCQGAGCVPSASATTTAAAASPSSTMASTTSTTTSNIAAGSPPWRPTGSPETTTAWTSGESATQSGCPTGFYGCLATHGGGCCRTDRQCQTSSCPPAPLTTMVANGVTIVVPVGDVPRPTATTTCANGWFMCGSEAGPVAGCCPSGYSCGTASCFTAQASQTGSRPKLVPGQSAASRAGAAAAGMLLLGPALGACLMMMHALWW	0.339	19	0.553	19	0.943	14	0.907	0.744	Y	0.45	SignalP-noTM		extr 26	HAAASQQQKQQQLLAAIKKLSPDSNEKLFPEHLSFAPLTVFPREAAQFFAYDNDDDEDLQLNETARFFLPAFARHQDDGEPGLLRRAAEALTLLQRQASCPVGMKSCADQGAPNKCCQEGTYCAGVADANVGQVACCPLGTGCTGGVGSCPSDATSCSSELGGGCCIPGFVCQGAGCVPSASATTTAAAASPSSTMASTTSTTTSNIAAGSPPWRPTGSPETTTAWTSGESATQSGCPTGFYGCLATHGGGCCRTDRQCQTSSCPPAPLTTMVANGVTIVVPVGDVPRPTATTTCANGWFMCGSEAGPVAGCCPSGYSCGTASCFTAQASQTGSRPKLVPGQSAASRAGAAAAGMLLLGPALGACLMMMHALWW	374	none	0.24	cyto 10.5, cyto_nucl 10, nucl 8.5, plas 4.5, extr_plas 4.5, extr 3.5, mito 3	cyto	Cluster05441	-	-	-	PTHR39599:SF2||1.5E-55;PTHR39599||1.5E-55;	-	-	-	-	-	-	-	-	-	-	-
g3004.t1	Dreco_g3004	MWVSVLFSSAGLALSRPRQPVPRAPGTGGASTDALWPTVCYPFVENGTMAPCVSISKIETACVANGTDDVALEAHGRCMCGGSFFDDWRGCQRCLLAHGFRSDRDNLYWANVLSVASEALCTGTPTAEFSAIFASAEANPDKAPLATTGDTKSVDSFPGRTDVSLYYTASVTQGPGSVPPSASGPPMVMTTAESGGGPIPTDVMTSWGSVPDASTTDLASNETAYTTTASSDSTVATACTDTSICAAATDGAGSRGAAMALAGAALVMAL	0.331	16	0.442	16	0.688	10	0.604	0.53	Y	0.45	SignalP-noTM		extr 21, mito 4	PRQPVPRAPGTGGASTDALWPTVCYPFVENGTMAPCVSISKIETACVANGTDDVALEAHGRCMCGGSFFDDWRGCQRCLLAHGFRSDRDNLYWANVLSVASEALCTGTPTAEFSAIFASAEANPDKAPLATTGDTKSVDSFPGRTDVSLYYTASVTQGPGSVPPSASGPPMVMTTAESGGGPIPTDVMTSWGSVPDASTTDLASNETAYTTTASSDSTVATACTDTSICAAATDGAGSRGAAMALAGAALVMAL	254	none	0.05	extr 10, mito 10, nucl 6, cyto 4, cyto_pero 3.5	extr	Cluster13946	-	-	-	-	-	-	-	-	-	-	-	-	-	-	-
g3088.t1	Dreco_g3088	MKFFVPLTLLVAAGVSADGTASCDADFIVTQCLSTELPKAQACKTTDYDCLCAAYQSIATCYNNCPNDPRVSTAQGQVTQFCMNASVFGDRAVAAKTAAAAAAAKSDTSSPDTTDSEEAPAQTSSSRRPAASKSAATGTTSAPAAVNTNAAALARSGSAGGALVVAGVVAALL	0.389	18	0.598	18	0.957	10	0.917	0.77	Y	0.45	SignalP-noTM		extr 26	GTASCDADFIVTQCLSTELPKAQACKTTDYDCLCAAYQSIATCYNNCPNDPRVSTAQGQVTQFCMNASVFGDRAVAAKTAAAAAAAKSDTSSPDTTDSEEAPAQTSSSRRPAASKSAATGTTSAPAAVNTNAAALARSGSAGGALVVAGVVAALL	155	none	0.19	plas 21.5, extr_plas 13, extr 3.5, mito 3, lyso 3	plas		-	-	-	-	-	-	-	-	-	-	-	-	-	-	-
g3100.t1	Dreco_g3100	MTWVQPLSIAWQWLAVLVLALTPAVTAAAAAKSAADYYVRDLPGLPQDSNPVKMHAGHIEITPDHNGNMFFWHFQNKHIANRQRTVIWVNGGPGCSSEDGALMEIGPYRVREKGNLVVNNGSWNEFANLLFVDNPVGTGFSYVDTDSYVHELDVMADQFVQFLDKFFAIFPEYDQDDIYMAGESYAGQHIPYIAKAILDRNKKNRGKEWKLKGLLIGNGWLSPNDQYDTYLKFAFEKGLLKKGSEQAELLQAKQNTCYRLLGSNPGHVDYAECEDIMSSMLKLLKTGSGNEECYNMYDVRLRDSYPSCGMNWPPDLANMTPYLRRDDVTKALHVNRQRGTGWQECNGAVSFAFRAKNSKPSVTLLPDLIKEIQILLFSGAEDLICNHIGTEQVINNLEW…	0.536	29	0.722	29	0.995	18	0.97	0.856	Y	0.45	SignalP-noTM		extr 20, E.R. 3, plas 2	AAKSAADYYVRDLPGLPQDSNPVKMHAGHIEITPDHNGNMFFWHFQNKHIANRQRTVIWVNGGPGCSSEDGALMEIGPYRVREKGNLVVNNGSWNEFANLLFVDNPVGTGFSYVDTDSYVHELDVMADQFVQFLDKFFAIFPEYDQDDIYMAGESYAGQHIPYIAKAILDRNKKNRGKEWKLKGLLIGNGWLSPNDQYDTYLKFAFEKGLLKKGSEQAELLQAKQNTCYRLLGSNPGHVDYAECEDIMSSMLKLLKTGSGNEECYNMYDVRLRDSYPSCGMNWPPDLANMTPYLRRDDVTKALHVNRQRGTGWQECNGAVSFAFRAKNSKPSVTLLPDLIKEIQILLFSGAEDLICNHIGTEQVINNLEWNGGKGFEVTPGNWAPRRNWTFEGEDAGFW…	607	none	0.35	cyto 13, cyto_nucl 9.83333, cyto_mito 8.16667, pero 7.5, nucl 5.5, mito_pero 5.33333, plas 2.5	cyto	Cluster01333	E9E1Z2|KEX1_METAQ|0	901|PHI:901|um01886||5270|Ustilagomaydis|Unaffectedpathogenicity|2e-56	PF00450|Serine carboxypeptidase|1.5E-112;	PTHR11802||2.2E-258;PTHR11802:SF50||2.2E-258;	SSF53474||3.77E-118;	-	-	PS00131|Serine carboxypeptidases, serine active site.|-;	-	-	-	G3DSA:3.40.50.1820||5.5E-132;	-	-	PR00724|Carboxypeptidase C serine protease (S10) family signature|1.5E-20;PR00724|Carboxypeptidase C serine protease (S10) family signature|1.5E-20;PR00724|Carboxypeptidase C serine protease (S10) family signature|1.5E-20;PR00724|Carboxypeptidase C serine protease (S10) family signature|1.5E-20;
g3110.t1	Dreco_g3110	MKNSAFFAATLAAVAASATGIDDADKVNCARPNANYCIGGDIILRCDENSIGTKGRCSANVSGYPPFGGTAECFESSEEAGDAACQKNCVVYAEPSFTLPADRCTPSYIPTPVRRAVTNAESDMMSIPEGTNLVTADDPATDSVDFATVTGTMSIPEGSLAIPDDPVTVTGDTMSIPEGTLSIPEGTLPVPTSASTSTSHAATTGSLTEQTRTPTATMPSGRPSTRPTGTAATESQMVTRTTAATTAATAVTTTAKTALAHANRVTGLLLAAGIVAVYLL	0.343	21	0.509	21	0.871	15	0.753	0.641	Y	0.45	SignalP-noTM		extr 23, cyto 2	DDADKVNCARPNANYCIGGDIILRCDENSIGTKGRCSANVSGYPPFGGTAECFESSEEAGDAACQKNCVVYAEPSFTLPADRCTPSYIPTPVRRAVTNAESDMMSIPEGTNLVTADDPATDSVDFATVTGTMSIPEGSLAIPDDPVTVTGDTMSIPEGTLSIPEGTLPVPTSASTSTSHAATTGSLTEQTRTPTATMPSGRPSTRPTGTAATESQMVTRTTAATTAATAVTTTAKTALAHANRVTGLLLAAGIVAVYLL	259	none	0.06	plas 21, mito 7, cyto 2	plas	Cluster12439	-	-	-	-	-	-	-	-	-	-	-	-	-	-	-
g3121.t1	Dreco_g3121	MKFTAAAVLAAAAGATAHYASNVTYVTEVVNSYVTYCPSPTILVHGSKTYHVSTPGTVTITDCPCTISKPVIPTTAVVCHNCAPGYKNVTVPAKPTVVPTPVGTGSPIPPKEPAPIATAGAAKAVALTGAGLAGIVGLAAFIL	0.2	18	0.372	18	0.799	1	0.66	0.527	Y	0.45	SignalP-noTM		extr 23, vacu 3	YASNVTYVTEVVNSYVTYCPSPTILVHGSKTYHVSTPGTVTITDCPCTISKPVIPTTAVVCHNCAPGYKNVTVPAKPTVVPTPVGTGSPIPPKEPAPIATAGAAKAVALTGAGLAGIVGLAAFIL	125	none	0.01	cyto 17, extr 9, plas 3	cyto	Cluster07347	Q01302|CCG6_NEUCR|1e-18	-	-	PTHR35523:SF1||2.4E-20;PTHR35523||2.4E-20;	-	-	-	-	-	-	-	-	-	-	-
g3131.t1	Dreco_g3131	MRLVDALVFAAAAAAAALQSEGPSLDVLEEVKTAVEGAVAMLHRRKDASSKILYPEFPVHEFYLLNGFVKDEARIIYQSPEPLSIAIAGRLLKPAKEFPALAVALHSALADENIKAAIMWNDDCWGVRSSIVGLQGALNDLRINVYELLPGIRQHDGYRKLESFTRSLAETSSLLGDCQPEGLDAA	0.165	18	0.345	18	0.822	7	0.711	0.542	Y	0.45	SignalP-noTM		extr 13, cyto 3.5, cyto_nucl 2.5, plas 2, pero 2, E.R. 2, golg 2	QSEGPSLDVLEEVKTAVEGAVAMLHRRKDASSKILYPEFPVHEFYLLNGFVKDEARIIYQSPEPLSIAIAGRLLKPAKEFPALAVALHSALADENIKAAIMWNDDCWGVRSSIVGLQGALNDLRINVYELLPGIRQHDGYRKLESFTRSLAETSSLLGDCQPEGLDAA	168	none	0.08	cysk 30	cysk		-	-	-	-	-	-	-	-	-	-	-	-	-	-	-
g3155.t1	Dreco_g3155	MRRSIPLLHHTCLLPLGFCSPAAVSRPVVDDASASFAHLLFLPGLLLEPKPKPKPKVKAKLPHENIMSSPLRLLVLAAAAAAPAVTALYVNGSTVVPCDSPIYCHGDILREVELARPFSDSKTFVDMPAIRPLDVIRAAFDKLHKPLKNDSALHEFLKTHFADAGGELKEVPRSKLTTDAVFLRGIEDVDIREFTAKVIDIWPSLTREYAGSRPDCPDCPSSFIPVKKPFVVAGGRFREPYYWDSYWILEGLLRTRGSFTDIARNTIENFLDLIEQFGFIPNGARIYYLNRSQPPMLAQMIGLYLEHTNDKSILDRALPLLVREHDFWLQNRTVEIRRAGSTYHLARYAVRNTQPRPESFREDYNQATNASFHATSRIVYPQVAALDEEQQEQLYGNLA…	0.186	26	0.345	26	0.832	13	0.645	0.507	Y	0.45	SignalP-noTM		extr 14, mito 4, plas 3, cyto_mito 3, cyto 2, golg 2, mito_nucl 2	PVVDDASASFAHLLFLPGLLLEPKPKPKPKVKAKLPHENIMSSPLRLLVLAAAAAAPAVTALYVNGSTVVPCDSPIYCHGDILREVELARPFSDSKTFVDMPAIRPLDVIRAAFDKLHKPLKNDSALHEFLKTHFADAGGELKEVPRSKLTTDAVFLRGIEDVDIREFTAKVIDIWPSLTREYAGSRPDCPDCPSSFIPVKKPFVVAGGRFREPYYWDSYWILEGLLRTRGSFTDIARNTIENFLDLIEQFGFIPNGARIYYLNRSQPPMLAQMIGLYLEHTNDKSILDRALPLLVREHDFWLQNRTVEIRRAGSTYHLARYAVRNTQPRPESFREDYNQATNASFHATSRIVYPQVAALDEEQQEQLYGNLAAAAETGWDFSSRWLANPSDSARDVYF…	715	50 - KPKPKPKVKAK - 60	0.19	E.R. 7, extr 6, cyto_pero 5, mito_pero 4.83333, cyto 4.5, plas 4, pero 4, mito 2.5	E.R.	Cluster00041	Q54QZ5|TREA_DICDI|1e-101	4575|NTH2|PHI:4575|Q5KEF4|5207|Cryptococcusneoformans|mixedoutcome|8e-72	PF01204|Trehalase|3.3E-116;	PTHR23403:SF1||6.5E-220;PTHR23403:SF1||6.5E-220;PTHR23403||6.5E-220;PTHR23403:SF1||6.5E-220;PTHR23403||6.5E-220;PTHR23403||6.5E-220;	SSF48208||3.88E-123;	-	-	PS00928|Trehalase signature 2.|-;	-	-	-	-	-	-	PR00744|Glycosyl hydrolase family 37 signature|2.8E-28;PR00744|Glycosyl hydrolase family 37 signature|2.8E-28;PR00744|Glycosyl hydrolase family 37 signature|2.8E-28;PR00744|Glycosyl hydrolase family 37 signature|2.8E-28;PR00744|Glycosyl hydrolase family 37 signature|2.8E-28;
g3171.t1	Dreco_g3171	MGIRMVLMVLMVFVAAAHTRHNRYSIEVKFGTALHYTWVPTRGDELNSHQPLVSTSSTPEFVMNRPRNRQPRSGKRSAPNSQNANSTPQQTSGSVPTVHQVIPGASVFIILKEDQPTGSETLGVVQDVLTKGNHPRGIKVRLREGQVGRVQRMNKDAAPSTSNGAEAQTIHFTPGSGRWTHRYADVRTELDEYPEAPPERSLADFMPALPANVPALAADGLGAPSIHCPVCDVFEGDEAAVTHHIEQDHFK	0.545	20	0.682	20	0.949	15	0.847	0.771	Y	0.45	SignalP-noTM		extr 14, mito 7, plas 2, E.R. 2	HNRYSIEVKFGTALHYTWVPTRGDELNSHQPLVSTSSTPEFVMNRPRNRQPRSGKRSAPNSQNANSTPQQTSGSVPTVHQVIPGASVFIILKEDQPTGSETLGVVQDVLTKGNHPRGIKVRLREGQVGRVQRMNKDAAPSTSNGAEAQTIHFTPGSGRWTHRYADVRTELDEYPEAPPERSLADFMPALPANVPALAADGLGAPSIHCPVCDVFEGDEAAVTHHIEQDHFK	231	none	0.25	mito 12, cyto_nucl 8.5, cyto 7, mito_pero 7, nucl 6, E.R._mito 6	mito	Cluster00812	P39588|YWBE_BACSU|2e-09	-	PF09962|Uncharacterized conserved protein (DUF2196)|3.4E-23;	PTHR40069||2.0E-21;PTHR40069:SF1||2.0E-21;	-	TIGR03833|TIGR03833: conserved hypothetical protein|2.2E-21;	-	-	-	-	-	-	-	-	-
g3187.t1	Dreco_g3187	MPSMLLKSFTLVLAASLVSLGQAAPNPVDTASAAGTSVDGYSNTVFFSNRDIYKQKYQPQDLPLSDITYVFYSFVGVLSNGTVESSVSVDRYADLQKKYLHYAWERSGTNAYGCVKELYLLKKHKRMTKMILSVGGWGSSRIFRTVAATKTGRDVFAK	0.692	24	0.796	24	0.981	14	0.915	0.86	Y	0.45	SignalP-noTM		extr 23, E.R. 2	PNPVDTASAAGTSVDGYSNTVFFSNRDIYKQKYQPQDLPLSDITYVFYSFVGVLSNGTVESSVSVDRYADLQKKYLHYAWERSGTNAYGCVKELYLLKKHKRMTKMILSVGGWGSSRIFRTVAATKTGRDVFAK	134	none	0.08	nucl 19.5, cyto_nucl 17, cyto 9.5	nucl	Cluster00042	P32470|CHI1_APHAL|5e-34	144|PHI:144|CHT42|AAC05829|29875|Trichodermavirens|Reducedvirulence|1e-31	PF00704|Glycosyl hydrolases family 18|1.2E-9;	PTHR11177||2.2E-14;PTHR11177||2.2E-14;	SSF51445||9.13E-21;	-	-	-	-	-	-	G3DSA:3.20.20.80||1.4E-21;	-	-	-
g3191.t1	Dreco_g3191	MQSAALLALVAAVASASPYAPFPRVMTTERTTTSSRSTTTTVTISMCRPNAIYCPLKAEAEATPAVAPVAAAVEPSTTPASPAPKSPAVDKAFVGEAQPTPAAGETDNSISDEIDCPAADVEDDDTPADKTSGTVSDKADSSMVTGGETNKTPVDGEMDQTTVDGERPNTAVGVDASNGVDDDSDSPEDANSPEDADGPEDADSPSSSDAHDVDSTGPSDGDSRAAAKNSTTPVGPAGTGTGTGSRTANVPSRNGTSNQPPVAPTTGAAARFQAQTGVIGAALVAAALAFAC	0.376	17	0.565	17	0.879	1	0.837	0.712	Y	0.45	SignalP-noTM		extr 26	PYAPFPRVMTTERTTTSSRSTTTTVTISMCRPNAIYCPLKAEAEATPAVAPVAAAVEPSTTPASPAPKSPAVDKAFVGEAQPTPAAGETDNSISDEIDCPAADVEDDDTPADKTSGTVSDKADSSMVTGGETNKTPVDGEMDQTTVDGERPNTAVGVDASNGVDDDSDSPEDANSPEDADGPEDADSPSSSDAHDVDSTGPSDGDSRAAAKNSTTPVGPAGTGTGTGSRTANVPSRNGTSNQPPVAPTTGAAARFQAQTGVIGAALVAAALAFAC	275	none	0.07	mito 21, plas 4.5, extr_plas 3.5, nucl 3	mito		-	-	-	-	-	-	-	-	-	-	-	-	-	-	-
g3220.t1	Dreco_g3220	MAPFHHQLSAALCHLFCSLTADEGRNGRGRGEKQIEQQIEQQTEQQTEQQKEQPTLGGSHSQTTPRRSGWKRFLFTQTRTMEPKADGDKMNVSPDSTHLATTFGGLDLAGPDDGTLSSKPKQDAPDDDPEAIRVREQNQFFITEAIAMARLALRTNETPVGCVLVHDGRIIAKGMNATNVTRNGTRHAELMAISALLSVAAKSGPKTTALKPKPAAEEATASNRPSTAEGTPPATSSSAASGTTGENGSVASVDLAPPDDGNDDGSKGHLYPYGQRFYPAERVDPAILKECILYVTVEPCVMCASLLRQFGIKKVYFGAVNDKFGGTGGVFSIHANSLPVSPDGQTAAAHPIPRQPQAQLPDGTVVLGTSYPPDGGDGGNVEPGFEIEGGWGRDEAVGL…	0.186	22	0.356	22	0.82	1	0.675	0.528	Y	0.45	SignalP-noTM		extr 10, cyto 6.5, cyto_nucl 5, mito 3, nucl 2.5, pero 2, vacu 2	EGRNGRGRGEKQIEQQIEQQTEQQTEQQKEQPTLGGSHSQTTPRRSGWKRFLFTQTRTMEPKADGDKMNVSPDSTHLATTFGGLDLAGPDDGTLSSKPKQDAPDDDPEAIRVREQNQFFITEAIAMARLALRTNETPVGCVLVHDGRIIAKGMNATNVTRNGTRHAELMAISALLSVAAKSGPKTTALKPKPAAEEATASNRPSTAEGTPPATSSSAASGTTGENGSVASVDLAPPDDGNDDGSKGHLYPYGQRFYPAERVDPAILKECILYVTVEPCVMCASLLRQFGIKKVYFGAVNDKFGGTGGVFSIHANSLPVSPDGQTAAAHPIPRQPQAQLPDGTVVLGTSYPPDGGDGGNVEPGFEIEGGWGRDEAVGLLRRFYVQENGRAPVPRKKEGRA…	471	none	0.27	cyto 12.5, cyto_mito 8.16667, pero 6, mito_pero 5.33333, nucl 5, plas 4.5, extr_plas 3	cyto	Cluster06352	O94642|TAD2_SCHPO|5e-20	-	PF00383|Cytidine and deoxycytidylate deaminase zinc-binding region|1.0E-20;	PTHR11079||7.1E-49;PTHR11079:SF72||7.1E-49;PTHR11079||7.1E-49;PTHR11079||7.1E-49;PTHR11079:SF72||7.1E-49;PTHR11079:SF72||7.1E-49;	SSF53927||7.53E-34;SSF53927||7.53E-34;	-	-	-	PS51747|Cytidine and deoxycytidylate deaminases domain profile.|19.453;	-	Coil||-;	G3DSA:3.40.140.10||2.3E-51;G3DSA:3.40.140.10||2.3E-51;G3DSA:3.40.140.10||2.3E-51;	-	-	-
g3233.t1	Dreco_g3233	MKWTNALVFATTASAAALHGEGVNFDILKQVNTTLQEIITTLNGENTASTESINGAFFESRLPPLTDAVKVEARKIYLLNEKFSIEDRDRLFAPASKFPELAEALDSALKAATTDETASTTATTVTVVTAGAAGGALNAGELLEVP	0.201	23	0.331	16	0.769	15	0.634	0.495	Y	0.45	SignalP-noTM		extr 15, cyto 6, mito 3, cyto_nucl 3	NFDILKQVNTTLQEIITTLNGENTASTESINGAFFESRLPPLTDAVKVEARKIYLLNEKFSIEDRDRLFAPASKFPELAEALDSALKAATTDETASTTATTVTVVTAGAAGGALNAGELLEVP	123	none	0.02	cyto 15.5, cyto_nucl 13, nucl 7.5, mito 3, cysk 3	cyto		-	-	-	-	-	-	-	-	-	-	-	-	-	-	-
g3237.t1	Dreco_g3237	MVQLTVAATFALCAGSALASCHYGTSHFKRENKVPVFKFGYTGLIGPLNWYGLNPNVNKLCATGTHQSPINLNGSTTTSPGSSVSFQVDGAPNGSVLENLGTTLEVPGNGTLVHGGKTYHLVQFHFHTPSEHFIESEYSVMEVHFVFQADDKSLTAVGFLIDLGPTTPFLSSVFQNVDQVATPGSDAATGPLCFTELENHLKNNNIYTQAHPVPQSDVPRSLTVASRYSGSLTTPPCAEGVSWIVSSQPLHIDADTYHKVKDIIRFNARYIQNVPGGVNLLQNAANYLQK	0.712	20	0.747	20	0.899	1	0.765	0.757	Y	0.45	SignalP-noTM		extr 26	CHYGTSHFKRENKVPVFKFGYTGLIGPLNWYGLNPNVNKLCATGTHQSPINLNGSTTTSPGSSVSFQVDGAPNGSVLENLGTTLEVPGNGTLVHGGKTYHLVQFHFHTPSEHFIESEYSVMEVHFVFQADDKSLTAVGFLIDLGPTTPFLSSVFQNVDQVATPGSDAATGPLCFTELENHLKNNNIYTQAHPVPQSDVPRSLTVASRYSGSLTTPPCAEGVSWIVSSQPLHIDADTYHKVKDIIRFNARYIQNVPGGVNLLQNAANYLQK	270	none	0.03	cyto_nucl 13.8333, nucl 13.5, cyto 9, cyto_pero 6.16667, mito 6, E.R._mito 6	cyto_nucl	Cluster07710	O52538|CAH_PECCA|4e-26	-	PF00194|Eukaryotic-type carbonic anhydrase|2.4E-26;	PTHR18952||1.4E-39;PTHR18952||1.4E-39;PTHR18952:SF86||1.4E-39;PTHR18952:SF86||1.4E-39;	SSF51069||3.27E-48;	-	-	-	PS51144|Alpha-carbonic anhydrases profile.|31.765;	SM01057|Eukaryotic-type carbonic anhydrase|5.2E-34;	-	G3DSA:3.10.200.10||4.1E-49;	-	-	-
g3241.t1	Dreco_g3241	MRVAGALLFAAVASAGLFYGPNPSKELLLGIVRPTQDLLSDVNAYDLRDVSINDIFHTFITDVRVGIRNVIHSTLDGPEHAAVLFRFAGDLETIGTSMHRVLRHQKELIRADHGCFATERSLRITQDAFLTLGRFLVDAVPDHRRDETVLLDRQMLDILGRTVQEFMQGSCDDDGPRPSPEAPRTHNDEHGPYASSKGRVSYETSWEP	0.23	16	0.428	16	0.86	7	0.774	0.615	Y	0.45	SignalP-noTM		extr 20, E.R. 5	LFYGPNPSKELLLGIVRPTQDLLSDVNAYDLRDVSINDIFHTFITDVRVGIRNVIHSTLDGPEHAAVLFRFAGDLETIGTSMHRVLRHQKELIRADHGCFATERSLRITQDAFLTLGRFLVDAVPDHRRDETVLLDRQMLDILGRTVQEFMQGSCDDDGPRPSPEAPRTHNDEHGPYASSKGRVSYETSWEP	192	none	0.17	cyto 20.5, cyto_nucl 14, nucl 6.5, mito 4	cyto		-	-	-	-	-	-	-	-	-	-	-	-	-	-	-
g3258.t1	Dreco_g3258	MRLLLFFLAFVPPPGAAVCECGYSVQGPPDGRADGPWLFTDALESDFTRIANISRDRDWVRQRFDVSAEAGRGKYGKAFDPANVVSRPRPRTDDEGEPPRWSGLELRVGGALEGNAVPVAEVDSSRLDMQWGSYRAAMKLPTVSGTCSAFFWYWNDTQEIDMEFLSREFDASKKLYPVNLVIQSPKSMEAGYDASKTGTFKRVNLGFDPTDGFHEYRFDYLPGRVLFYADSQMLTEMTGDVMPSGAGHVILQHWSNGNPLWSGGPPTQDALLTVSYVKAYFNSSGSAGLSAWSRQCSDTKTTVCAVQDTAADAIGTGGHFFTDQRNKSSGGDDENKGPRRTDPSRGAARIALLAMSLMLMMS	0.668	18	0.782	18	0.95	7	0.907	0.85	Y	0.45	SignalP-noTM		extr 13, plas 8, E.R. 3, mito 2	CECGYSVQGPPDGRADGPWLFTDALESDFTRIANISRDRDWVRQRFDVSAEAGRGKYGKAFDPANVVSRPRPRTDDEGEPPRWSGLELRVGGALEGNAVPVAEVDSSRLDMQWGSYRAAMKLPTVSGTCSAFFWYWNDTQEIDMEFLSREFDASKKLYPVNLVIQSPKSMEAGYDASKTGTFKRVNLGFDPTDGFHEYRFDYLPGRVLFYADSQMLTEMTGDVMPSGAGHVILQHWSNGNPLWSGGPPTQDALLTVSYVKAYFNSSGSAGLSAWSRQCSDTKTTVCAVQDTAADAIGTGGHFFTDQRNKSSGGDDENKGPRRTDPSRGAARIALLAMSLMLMMS	344	none	0.13	nucl 18, cyto_nucl 16, cyto 8, extr 2, pero 2	nucl	Cluster02856	P23904|GUB_PAEMA|1e-08	-	PF00722|Glycosyl hydrolases family 16|5.8E-12;	PTHR38121:SF2||7.0E-53;PTHR38121||7.0E-53;	SSF49899||2.8E-29;	-	-	-	-	-	-	G3DSA:2.60.120.200||2.8E-6;G3DSA:2.60.120.200||1.2E-25;	-	-	-
g3273.t1	Dreco_g3273	MRPAQYMVPLALCLSSMTPIVSASAWPGWLPRLDSLVVRANNDDAVDATATRTASAAAKTVQPTKGTARDLNTAEPTKSGDVKETGSSKDTKETGADKSGDGGGPRTTFAPDAPAGGVSMLSPAIMTQPTPLYKISDYVTWSWNYTSLLGTPTAVDILVSCTQAGVVTIASNMSFATSVNYVWDTRLQAGSAENPLRTDMYTLIIKASDAEITDRPEPGYLGTWSGFRFGLYSARPYQPFSEWKCPGVCSAASSLPGHEAVRLALTMSLLSLTAFTWFVVGLGLP	0.728	24	0.682	24	0.89	22	0.639	0.659	Y	0.45	SignalP-noTM		extr 19, mito 7	AWPGWLPRLDSLVVRANNDDAVDATATRTASAAAKTVQPTKGTARDLNTAEPTKSGDVKETGSSKDTKETGADKSGDGGGPRTTFAPDAPAGGVSMLSPAIMTQPTPLYKISDYVTWSWNYTSLLGTPTAVDILVSCTQAGVVTIASNMSFATSVNYVWDTRLQAGSAENPLRTDMYTLIIKASDAEITDRPEPGYLGTWSGFRFGLYSARPYQPFSEWKCPGVCSAASSLPGHEAVRLALTMSLLSLTAFTWFVVGLGLP	261	none	0.05	cyto_nucl 16, nucl 15.5, cyto 11.5, extr 5	cyto_nucl	Cluster07698	-	-	-	PTHR42028:SF1||8.9E-51;PTHR42028||8.9E-51;	-	-	-	-	-	-	-	-	-	-	-
g3280.t1	Dreco_g3280	MRFLSHLVAALAIAPAALAVDLRKAAIVKFDDAAPDDFVKQVKDSIRTGGGIITHVYSLIKGFAVSDTPEKTLESIKAMSSGEYKVLVEEDLKVEV	0.833	20	0.855	20	0.938	2	0.872	0.864	Y	0.45	SignalP-noTM		extr 15, E.R. 5, golg 4, cyto 2	DLRKAAIVKFDDAAPDDFVKQVKDSIRTGGGIITHVYSLIKGFAVSDTPEKTLESIKAMSSGEYKVLVEEDLKVEV	76	none	0	cyto 21, extr 4, pero 3, cysk 2, extr_plas 2, mito_pero 2	cyto		Q8WZY3|YBG3_NEUCR|5e-08	-	-	PTHR28288||8.2E-17;PTHR28288:SF1||8.2E-17;	SSF54897||1.3E-9;	-	-	-	-	-	-	G3DSA:3.30.70.80||1.1E-15;	-	-	-
g3306.t1	Dreco_g3306	MIWGRATFLVVLGPLAFVNANESRTRAQQTTIPISDGIAADPHGPNICEARTINYITHTLPQSCLTTSWASPHPLSSTYAGPVGSDGVRESITTFTSDPTVSEAHTAEATATTFMSFEDWKEMMLRRAGQDPQEWRSRKPSDHTPDDRYLPDMGDAGLGEEDEISLDFDSYRYQSGDDKKGDMTGSAEANDDRNSHDAQAYGDGKAATIHRSKDAGKTCKERFSYSSFDAGATILKTAAGAKNARAILVENKDSYMLLECAAPTKYVIFELSDDILVDTIVIANFEFFSSMIRLFRVSVSDRYPVKTERWRELGTFEARNSRDIQPFLVDNPQIWAKYRNWP	0.566	21	0.682	21	0.895	2	0.814	0.753	Y	0.45	SignalP-noTM		extr 18, cyto 4, nucl 2, mito 2, mito_nucl 2	ESRTRAQQTTIPISDGIAADPHGPNICEARTINYITHTLPQSCLTTSWASPHPLSSTYAGPVGSDGVRESITTFTSDPTVSEAHTAEATATTFMSFEDWKEMMLRRAGQDPQEWRSRKPSDHTPDDRYLPDMGDAGLGEEDEISLDFDSYRYQSGDDKKGDMTGSAEANDDRNSHDAQAYGDGKAATIHRSKDAGKTCKERFSYSSFDAGATILKTAAGAKNARAILVENKDSYMLLECAAPTKYVIFELSDDILVDTIVIANFEFFSSMIRLFRVSVSDRYPVKTERWRELGTFEARNSRDIQPFLVDNPQIWAKYRNWP	321	none	0.37	cyto 18, cyto_nucl 16, nucl 10	cyto	Cluster00887	Q12232|SLP1_YEAST|8e-39	-	PF07738|Sad1 / UNC-like C-terminal|3.1E-20;	PTHR12953||8.5E-63;PTHR12953:SF0||8.5E-63;	-	-	-	-	PS51469|SUN domain profile.|26.106;	-	-	-	-	-	-
g3312.t1	Dreco_g3312	MKAATILCFAATALAGAIEARNGHCGGDNCARQVTGTRDGLTPIESRKADCTSFMRSTVLPDAVTTTVTVTVDPSQTAPKLRRDATTVATATASVVPAYASGCKAASAYSSACACWGITAQLATGPTPTKTATVTVTGDFCEDL	0.429	21	0.569	21	0.914	15	0.748	0.666	Y	0.45	SignalP-noTM		extr 13, cyto 10, mito 4	NGHCGGDNCARQVTGTRDGLTPIESRKADCTSFMRSTVLPDAVTTTVTVTVDPSQTAPKLRRDATTVATATASVVPAYASGCKAASAYSSACACWGITAQLATGPTPTKTATVTVTGDFCEDL	123	none	0.04	extr 13, nucl 11, cyto_nucl 11, cyto 7	extr	Cluster06321	-	-	-	-	-	-	-	-	-	-	-	-	-	-	-
g3322.t1	Dreco_g3322	MRHASYPCLLAAGLARLLLVSTASATTSGLPAGLLKLGVPNRILPPDDDFVVSVDGDGHDLVKRANASKIVVHTGYFQQLIDHKNPSLGTFTQRYWWNADHYAGPGSPVVMNAPGENNGDGYQGYTTNRTLPGLFAQASGGAALLLEHRYWGGSSPFTNLTAKTLQYLNLENSIADLVYFAKNVDLAFDPTGSSRPDKAPWVLSGCSYPGALAAWTNVLAPGTFWAYHCSSAVVEVISTFSEYYDPIEAAMPRNCSADFRKVIAHVDRVLRDGPTEKRQRLKNLFGFGNLTHDDDFASSLIGGLVGWQGTQFYTGYTGLHRMCDYVENKWPGSKSSTPGEEGVGLCKAVKGFAKWSRDVMIPGSCATYGYWKDNNTVACYDSYDKLSPTFTDTSVNNTV…	0.562	26	0.692	26	0.945	7	0.858	0.782	Y	0.45	SignalP-noTM		extr 22, mito 3	TSGLPAGLLKLGVPNRILPPDDDFVVSVDGDGHDLVKRANASKIVVHTGYFQQLIDHKNPSLGTFTQRYWWNADHYAGPGSPVVMNAPGENNGDGYQGYTTNRTLPGLFAQASGGAALLLEHRYWGGSSPFTNLTAKTLQYLNLENSIADLVYFAKNVDLAFDPTGSSRPDKAPWVLSGCSYPGALAAWTNVLAPGTFWAYHCSSAVVEVISTFSEYYDPIEAAMPRNCSADFRKVIAHVDRVLRDGPTEKRQRLKNLFGFGNLTHDDDFASSLIGGLVGWQGTQFYTGYTGLHRMCDYVENKWPGSKSSTPGEEGVGLCKAVKGFAKWSRDVMIPGSCATYGYWKDNNTVACYDSYDKLSPTFTDTSVNNTVNRQWMWFLCNEPSPIPVAVAVHDKGQ…	561	none	0.24	nucl 16.5, cyto_nucl 16.5, cyto 11.5, mito 1.5, E.R._mito 1.5	nucl	Cluster00346	D4AYS6|A1345_ARTBC|2e-38	-	PF05577|Serine carboxypeptidase S28|7.3E-33;	PTHR11010||1.2E-167;PTHR11010||1.2E-167;PTHR11010:SF23||1.2E-167;PTHR11010:SF23||1.2E-167;	SSF53474||5.07E-7;	-	-	-	-	-	-	G3DSA:3.40.50.1820||9.2E-12;G3DSA:3.40.50.1820||9.2E-12;	-	-	-
g3328.t1	Dreco_g3328	MKHYPVLGALASSALAAPSLLKRADGDCGSRNATVNQHLASCASRSLLAQEAATSGPKWLMDLFFKTDDKQSRGVVADLFGKIAAECGTEGGSCYVTCGESCGGFNAYTTWVAETSKVRLCEPYFSMRTATCQNLDSASEMIHEMSHAKGSTSDFNGAYGLNAVRSLDGSQNIRHAETYAFFAHWVALNCTQADNTPQVPVTDPKGAPSKRLGDVPDSILKDGPSASPSPSAYEAGEEKKQGEVGNQETTSLDENSILEGGRQGQPEGTQGTSMTGGNQYGEVANKLTQGTSMTGGNQYGEVANKGNALEAEDEDSCDAEDEDEDDEF	0.339	17	0.428	17	0.635	1	0.505	0.47	Y	0.45	SignalP-noTM		extr 23, cyto 2.5, cyto_nucl 2	PSLLKRADGDCGSRNATVNQHLASCASRSLLAQEAATSGPKWLMDLFFKTDDKQSRGVVADLFGKIAAECGTEGGSCYVTCGESCGGFNAYTTWVAETSKVRLCEPYFSMRTATCQNLDSASEMIHEMSHAKGSTSDFNGAYGLNAVRSLDGSQNIRHAETYAFFAHWVALNCTQADNTPQVPVTDPKGAPSKRLGDVPDSILKDGPSASPSPSAYEAGEEKKQGEVGNQETTSLDENSILEGGRQGQPEGTQGTSMTGGNQYGEVANKLTQGTSMTGGNQYGEVANKGNALEAEDEDSCDAEDEDEDDEF	311	none	0.29	nucl 12, extr 10, cyto_nucl 10	nucl	Cluster10052	E3QWD3|NPIIA_COLGM|1e-15	2850|PHI:2850|AVR-Pita1|C1KJH9|148305|Magnaportheoryzae|Effector(plantavirulencedeterminant)|2e-08	PF02102|Deuterolysin metalloprotease (M35) family|1.4E-14;	PTHR37016||2.2E-24;	SSF55486||6.96E-25;	-	-	-	-	-	-	G3DSA:3.40.390.10||9.3E-31;	-	-	PR00768|Deuterolysin metalloprotease (M35) family signature|8.4E-6;PR00768|Deuterolysin metalloprotease (M35) family signature|8.4E-6;
g3336.t1	Dreco_g3336	MAKLQSCLVLLHALLCLAWGLDDSAIARRIKNDSSAHEEVPRTRSLQRRDVIIHAAPGDSELLKGYLHDAIRDSEDVMSNMISHLELIIDMFNEHGDLKQDKRTEESRTWDENNAYLTFQWYIARFDSGSPLDVIGLRSLTIVLETEFNAAWNNEPGSFPPMDIVLSEKTVFSDRDPWGRNYQQASQSSAPGYFLFRRDMARNDGVWIYHDALCASLDAPNWGIPRYENLMAYVVGSIHDAERPLRETMVFCDNHVLDWAAADSRGDASDRTSYRDLHVPIGGAMASRTSESALRLMSTIDPNKQANYLGDFFLTTFIREAAMAQAFCGIGNTLGIQSCDFGTTKNLACLQMLSGGIVRHDKEHLVRFRESMDFPSARDAHAFAMYAMAVYANAMNRTQ…	0.615	21	0.76	21	0.975	13	0.94	0.857	Y	0.45	SignalP-noTM		extr 16, cyto 5.5, cyto_nucl 4, plas 2, pero 2	DDSAIARRIKNDSSAHEEVPRTRSLQRRDVIIHAAPGDSELLKGYLHDAIRDSEDVMSNMISHLELIIDMFNEHGDLKQDKRTEESRTWDENNAYLTFQWYIARFDSGSPLDVIGLRSLTIVLETEFNAAWNNEPGSFPPMDIVLSEKTVFSDRDPWGRNYQQASQSSAPGYFLFRRDMARNDGVWIYHDALCASLDAPNWGIPRYENLMAYVVGSIHDAERPLRETMVFCDNHVLDWAAADSRGDASDRTSYRDLHVPIGGAMASRTSESALRLMSTIDPNKQANYLGDFFLTTFIREAAMAQAFCGIGNTLGIQSCDFGTTKNLACLQMLSGGIVRHDKEHLVRFRESMDFPSARDAHAFAMYAMAVYANAMNRTQMALLLSKVEQVAANVIVASAR…	440	none	0.37	nucl 16.5, cyto_nucl 15, cyto 10.5, golg 2	nucl		-	-	-	-	-	-	-	-	-	-	-	-	-	-	-
g3342.t1	Dreco_g3342	MMLSALCSFVTLALAAAQGLPDAVDAGATAQVPGLIRHPIRVSRTAPPGGKLRRRQVRIDHTTREDGIFYTIDLAIGTPAQTVPVMIDTGSTKLWVNPRCERARNEKLCSSFGRFTSSRTFTDLNKTSHAVYMGSAMARFRHGYDYVQVGPARLSQQIFGVAYDTEDISASILGLGPRLADWLNPYPLLLDNLVGQGFINSRSFSLDIRSLDSKSGSVIFGGVDTKKFRGKLEKRPIIPPPSSLKGSVGYWIHMDGIGVRRADGSAGTVYDKPNGVAIMVDSGSPFNSLPKAVFDDLIKQFPSAQPVSNSSDLYTVPCSVRDSDGHVDFKFGGAVINVPFKDFIFKYDQLCIIGANIAEEYPLLGDSFLRAAYVVFDQDNNNIHLANTHNCGTNLVPIG…	0.568	18	0.73	18	0.977	11	0.937	0.842	Y	0.45	SignalP-noTM		extr 25	GLPDAVDAGATAQVPGLIRHPIRVSRTAPPGGKLRRRQVRIDHTTREDGIFYTIDLAIGTPAQTVPVMIDTGSTKLWVNPRCERARNEKLCSSFGRFTSSRTFTDLNKTSHAVYMGSAMARFRHGYDYVQVGPARLSQQIFGVAYDTEDISASILGLGPRLADWLNPYPLLLDNLVGQGFINSRSFSLDIRSLDSKSGSVIFGGVDTKKFRGKLEKRPIIPPPSSLKGSVGYWIHMDGIGVRRADGSAGTVYDKPNGVAIMVDSGSPFNSLPKAVFDDLIKQFPSAQPVSNSSDLYTVPCSVRDSDGHVDFKFGGAVINVPFKDFIFKYDQLCIIGANIAEEYPLLGDSFLRAAYVVFDQDNNNIHLANTHNCGTNLVPIGKGPDGVPSVAGDCMPSST…	1062	none	0.28	cyto 11.5, cyto_nucl 11, nucl 9.5, plas 4, mito 3	cyto	Cluster00364	Q4WDN4|OPSB_ASPFU|6e-31	73|PHI:73|SAP3|AAA34372|5476|Candidaalbicans|Reducedvirulence|1e-25	PF00026|Eukaryotic aspartyl protease|3.6E-45;	PTHR13683:SF318||2.2E-59;PTHR13683||2.2E-59;	SSF50630||4.98E-64;	-	-	-	-	-	-	G3DSA:2.40.70.10||1.2E-29;G3DSA:2.40.70.10||3.2E-30;	-	-	PR00792|Pepsin (A1) aspartic protease family signature|2.1E-14;PR00792|Pepsin (A1) aspartic protease family signature|2.1E-14;PR00792|Pepsin (A1) aspartic protease family signature|2.1E-14;
g3344.t1	Dreco_g3344	MLFPAFVGSLLTVPLLSAPVAAVAAAPSERMAKLLRRSNIKRTSLGCDTSTFVLRLSTPSWSPDCGGACKPAQYIGHNGFSTDNVHAATVWTIIQGSLYSVSEGGSISISSGCDSEYFSPLQRASVIKTTFTVHDNTLVWSHAEFSGGSGHFCQRPADGAVIAYGDNVPAGCECTDLEVVTAHPIHSAMEHDMECHGKPGHDKPEKPEKPCVECEEKEKHEKPEKHEKPCVECEEKEKHEKHEKPEKPEKPCVECEEKEKHEKHDKHEKPCVECEEKEKHEKHDKNMKHEKPCLLCEEGEAGAPGAPGTPGAPGAPGGHGKPGSPGSPGEPGSPGRGGDGGDGGDGGSGGTGGNGGHGGHGGGNSTYHGGYNSGSKSTSGTKNTQTSAGNGGNGNGSGN…	0.521	26	0.663	26	0.955	6	0.85	0.764	Y	0.45	SignalP-noTM		extr 16, E.R. 3, cyto 2, golg 2, vacu 2	PSERMAKLLRRSNIKRTSLGCDTSTFVLRLSTPSWSPDCGGACKPAQYIGHNGFSTDNVHAATVWTIIQGSLYSVSEGGSISISSGCDSEYFSPLQRASVIKTTFTVHDNTLVWSHAEFSGGSGHFCQRPADGAVIAYGDNVPAGCECTDLEVVTAHPIHSAMEHDMECHGKPGHDKPEKPEKPCVECEEKEKHEKPEKHEKPCVECEEKEKHEKHEKPEKPEKPCVECEEKEKHEKHDKHEKPCVECEEKEKHEKHDKNMKHEKPCLLCEEGEAGAPGAPGTPGAPGAPGGHGKPGSPGSPGEPGSPGRGGDGGDGGDGGSGGTGGNGGHGGHGGGNSTYHGGYNSGSKSTSGTKNTQTSAGNGGNGNGSGNGNAGNGGNGGYESTGGDGGNGGSGNG…	452	none	0.2	mito 27, extr 2, cyto 2	mito		-	-	-	-	-	-	-	-	-	-	-	-	-	-	PR01228|Eggshell protein signature|7.5E-7;PR01228|Eggshell protein signature|7.5E-7;PR01228|Eggshell protein signature|7.5E-7;PR01228|Eggshell protein signature|7.5E-7;
g3366.t1	Dreco_g3366	MTTMAPWTLLALVWTAAWAVVGYGYDDIFASIPLTPDGMTARYLMPDLVPGVPLAKRDGSCGDGRHPCLDTHHSDRCCENTQYCYVNRAGLPRCCPIGSNCINDSSCQSTAYQCTTDITITTTAAGGTVGPLVLSSQVGCCSRRCPRTSQYLCADDLGGKCCPYGVECRSDGNCVSTRTASTSVPAKLTPVPDGCTTSQHKCADGTGCCDLSMHCTEVTGTAYCAPTDAHADNAARDGDTRASVGVAIGVGVGLGGGLSVGAAAWLCLARRRKRRRRASKTASLPMAPPGERGADPSLEMAELSEAAASPSSPLDRSLTEPLSAMSGLSPEFHSAGPAATPSPRWAGAVSPAPLGVNAVAAPVVMDLTTTTTTSQAAQVTPETIEGRFELYGCSPAHSSP	0.774	20	0.861	20	0.986	6	0.961	0.915	Y	0.45	SignalP-noTM		extr 20, plas 3, mito 2, cyto 2, cyto_mito 2	VGYGYDDIFASIPLTPDGMTARYLMPDLVPGVPLAKRDGSCGDGRHPCLDTHHSDRCCENTQYCYVNRAGLPRCCPIGSNCINDSSCQSTAYQCTTDITITTTAAGGTVGPLVLSSQVGCCSRRCPRTSQYLCADDLGGKCCPYGVECRSDGNCVSTRTASTSVPAKLTPVPDGCTTSQHKCADGTGCCDLSMHCTEVTGTAYCAPTDAHADNAARDGDTRASVGVAIGVGVGLGGGLSVGAAAWLCLARRRKRRRRASKTASLPMAPPGERGADPSLEMAELSEAAASPSSPLDRSLTEPLSAMSGLSPEFHSAGPAATPSPRWAGAVSPAPLGVNAVAAPVVMDLTTTTTTSQAAQVTPETIEGRFELYGCSPAHSSP	380	270 - RRRKRRRRASK - 280	0.55	plas 21.5, extr_plas 12, mito 5, nucl 3	plas	Cluster04980	-	-	-	-	-	-	-	-	-	-	-	-	-	-	-
g3377.t1	Dreco_g3377	MRSVTILSSVLAVGSAVVSAVTTCTDDIKVSQPTPVIDCEVVDGSIIVDESVSGSLSIEGPKKLNKDFVVMNATKLISISSSSITSIGGTMDFESLTLLSSLNMQSLTSVNKLKLAGLPQLNGLTFGSKGVSRVSDIEIVDTFISDLSGLSIATADTIFISNNLKLTKFNSDLVNVTKTLALVNNGNAMQVNMSRLQSAGEVEFRQVKSFDAPALTQVGSIKFNDSPELVSVSANNLSSITASLTFINNKKLTNISFESLESIKGDMTIQNNTALLALDGFNSLQSCGNMLLAGNFETVKMDKLNDVKGSATVTSTTDISSFCKFFDDLKSSGAIQGKESCTSNNKDANSGDSTGGQSNSDKQDGAGIVGVNMAVLGLAVLAGLAQVL	0.513	21	0.665	21	0.943	12	0.862	0.771	Y	0.45	SignalP-noTM		extr 18, plas 4, E.R. 3	TTCTDDIKVSQPTPVIDCEVVDGSIIVDESVSGSLSIEGPKKLNKDFVVMNATKLISISSSSITSIGGTMDFESLTLLSSLNMQSLTSVNKLKLAGLPQLNGLTFGSKGVSRVSDIEIVDTFISDLSGLSIATADTIFISNNLKLTKFNSDLVNVTKTLALVNNGNAMQVNMSRLQSAGEVEFRQVKSFDAPALTQVGSIKFNDSPELVSVSANNLSSITASLTFINNKKLTNISFESLESIKGDMTIQNNTALLALDGFNSLQSCGNMLLAGNFETVKMDKLNDVKGSATVTSTTDISSFCKFFDDLKSSGAIQGKESCTSNNKDANSGDSTGGQSNSDKQDGAGIVGVNMAVLGLAVLAGLAQVL	367	none	0.09	cyto 14, pero 8, plas 4, mito_pero 4	cyto	Cluster05436	O74411|MEU10_SCHPO|2e-35	-	-	PTHR31018||2.6E-32;	SSF52058||1.78E-9;SSF52058||8.51E-5;	-	-	-	-	-	-	-	-	-	-
g3382.t1	Dreco_g3382	MKYSAITILALAAAGLAMPGNDNHGRGGNHETRCSRQEYCCDKGLHILNIHRGGVAGGNQHCRGSVFCCDKGGKVGRVLDRKHFNCNKM	0.255	18	0.454	18	0.856	2	0.798	0.64	Y	0.45	SignalP-noTM		extr 9, mito 8, pero 4, cyto 3, nucl 2	PGNDNHGRGGNHETRCSRQEYCCDKGLHILNIHRGGVAGGNQHCRGSVFCCDKGGKVGRVLDRKHFNCNKM	71	none	0.08	extr 25, cyto 3, mito 3, cyto_mito 3	extr		-	-	-	-	-	-	-	-	-	-	-	-	-	-	-
g3389.t1	Dreco_g3389	MKGQTLLSVVAAAGLVSSSPAKPANGAPQKRATLTAVTAKGNAFWVGNERFYLRGIDYQPGGSSADKDPLGDPDVCERDIKQFKDLGVNTIRVYSVDNSKNHDKCMQALSDAGIYLVLDVNTPKYSINRADPKPSYNTKYLQNVFATVEMFAKYPNTLAFFSGNEVINEQKGTEKSAPYVKAVTRDIKNYLNSRGLRKVPVGYSAADVMSNRMETAMYMNCGTDDMRSDFFAFNDYSWCNSDFTTSGWDQKVKNFTDYGLPIFLSEWGCTKSRPRKFEEMGALMSSQMSSVYSGGLMYEYSVEENKFGIVTLDGDKVTTSDEFDLYRDALKANPMPTGSGGAASTTHAVACPTSDASWSVDPTRVPSMPSEAEKYMKSGAGDGAGFSGDGSQNAEDSGT…	0.317	27	0.403	27	0.754	9	0.525	0.469	Y	0.45	SignalP-noTM		extr 22, E.R. 3	PQKRATLTAVTAKGNAFWVGNERFYLRGIDYQPGGSSADKDPLGDPDVCERDIKQFKDLGVNTIRVYSVDNSKNHDKCMQALSDAGIYLVLDVNTPKYSINRADPKPSYNTKYLQNVFATVEMFAKYPNTLAFFSGNEVINEQKGTEKSAPYVKAVTRDIKNYLNSRGLRKVPVGYSAADVMSNRMETAMYMNCGTDDMRSDFFAFNDYSWCNSDFTTSGWDQKVKNFTDYGLPIFLSEWGCTKSRPRKFEEMGALMSSQMSSVYSGGLMYEYSVEENKFGIVTLDGDKVTTSDEFDLYRDALKANPMPTGSGGAASTTHAVACPTSDASWSVDPTRVPSMPSEAEKYMKSGAGDGAGFSGDGSQNAEDSGTSTADVTGGKPSPSSSSQENAGVSMRGP…	422	none	0.12	mito 13, plas 11, nucl 5	mito	Cluster02843	B0XT72|GEL1_ASPFC|1e-153	434|PHI:434|GEL2|EAL88984|5085|Aspergillusfumigatus|Reducedvirulence|4e-92	PF03198|Glucanosyltransferase|3.6E-126;	PTHR31468:SF5||9.2E-222;PTHR31468||9.2E-222;	SSF51445||1.42E-51;	-	-	-	-	-	-	G3DSA:3.20.20.80||1.9E-30;	-	-	-
g3409.t1	Dreco_g3409	MKSAIFTSAVLAAAAVAQPHGHGHGGRKHQHDARAHVVEWVTLTVTEYMESTTTRFIMPGEKADPTPAPDAKPQPPPAAPPVAIPEAPKQEPVQEAAKKPEAPPQPSVSPTPPPKQPDTPAPAAKPVYKPPPPVQAPAPAPAPAPAPAPAPAPAPAAENKSAAPSTGGAGSYSGPLTYYAVGLGACGYTDTDTENIIALSVPMYGSGGRCNSKITITANGKSVQAVVRDKCMGCEPTHIDASQNVWKELGLSLDIGKTTVSWSFN	0.26	18	0.404	18	0.73	6	0.61	0.515	Y	0.45	SignalP-noTM		extr 12, cyto 8, mito 7	PHGHGHGGRKHQHDARAHVVEWVTLTVTEYMESTTTRFIMPGEKADPTPAPDAKPQPPPAAPPVAIPEAPKQEPVQEAAKKPEAPPQPSVSPTPPPKQPDTPAPAAKPVYKPPPPVQAPAPAPAPAPAPAPAPAPAPAAENKSAAPSTGGAGSYSGPLTYYAVGLGACGYTDTDTENIIALSVPMYGSGGRCNSKITITANGKSVQAVVRDKCMGCEPTHIDASQNVWKELGLSLDIGKTTVSWSFN	247	none	0.12	cyto 17.5, cyto_nucl 12, mito 6, nucl 5.5	cyto		O42799|ALL7_ASPFU|7e-11	-	-	PTHR31836||1.4E-31;	SSF50685||1.01E-21;	-	-	-	-	-	-	G3DSA:2.40.40.10||1.4E-10;	-	-	-
g3424.t1	Dreco_g3424	MSLLRVLVLSQALGFVVGECSVNSSNCPGKLTRNTTSGIFAPHFPSSHPAVVSFPNIPYAQCPTGKLRFAPPVARAPPADGRVVHATDLPPGCVQSSQFASDTVYDAQKSYLLHGGNSSRSDKSEDCLRLSIFAPKATVHGAVRGGGRTPLPPLPVIVWIHGGGFQSGGIDVPYQLAFNWVQRSQRHLMVHVQYRLGLLGFPNAAGLAASGENVNLGLLDQRLAMEWVRANIASFGGDAERITLWGQSAGAFSTDAYLFAWAADPIVAGAIVGSGNALALEAYTGPSANHTHFTRVAASLGCAGLAPAAELTCMRSVPSSRLQNYLEALRVNGPIQIIADNVTVFSNYAARIAAGGSQFPTRLPLLLGTTTDEGNGMVSYSFNGSKTATSLPPALQSES…	0.682	19	0.779	19	0.96	10	0.882	0.834	Y	0.45	SignalP-noTM		extr 25	CSVNSSNCPGKLTRNTTSGIFAPHFPSSHPAVVSFPNIPYAQCPTGKLRFAPPVARAPPADGRVVHATDLPPGCVQSSQFASDTVYDAQKSYLLHGGNSSRSDKSEDCLRLSIFAPKATVHGAVRGGGRTPLPPLPVIVWIHGGGFQSGGIDVPYQLAFNWVQRSQRHLMVHVQYRLGLLGFPNAAGLAASGENVNLGLLDQRLAMEWVRANIASFGGDAERITLWGQSAGAFSTDAYLFAWAADPIVAGAIVGSGNALALEAYTGPSANHTHFTRVAASLGCAGLAPAAELTCMRSVPSSRLQNYLEALRVNGPIQIIADNVTVFSNYAARIAAGGSQFPTRLPLLLGTTTDEGNGMVSYSFNGSKTATSLPPALQSESKAFTLRFVCGTLREVRLRS…	516	none	0.08	mito 14, nucl 10, cyto 7, E.R._mito 7	mito	Cluster13047	O62760|CHLE_FELCA|3e-29	2927|PHI:2927|lip5|J9N2Z8|59765|Fusariumoxysporumf.sp.Lycopersici|Unaffectedpathogenicity|5e-172	PF00135|Carboxylesterase family|1.4E-67;	PTHR11559||1.4E-113;PTHR11559:SF232||1.4E-113;	SSF53474||4.12E-85;	-	-	PS00122|Carboxylesterases type-B serine active site.|-;	-	-	-	G3DSA:3.40.50.1820||5.1E-94;	-	-	-
g3428.t1	Dreco_g3428	MHFSPIFGAIALATAASAVTVSYDPGYDIRSRDLTAVSCSDGVNGLITRKGWRRQGDIPKFPYIGGAAAVGGWNSPNCGTCWKLDYAGKSITVLAIDHAGAGFNIALEAMNALTNGQAQQLGRVDAQATQIDAANCGM	0.323	19	0.516	19	0.907	4	0.815	0.678	Y	0.45	SignalP-noTM		extr 25	TVSYDPGYDIRSRDLTAVSCSDGVNGLITRKGWRRQGDIPKFPYIGGAAAVGGWNSPNCGTCWKLDYAGKSITVLAIDHAGAGFNIALEAMNALTNGQAQQLGRVDAQATQIDAANCGM	119	none	0.03	extr 18, cyto 10.5, cyto_nucl 7.5	extr	Cluster00954	O74238|SNP1_PHANO|8e-45	2118|PHI:2118|MgSM1|MGG_05344|148305|Magnaportheoryzae(related:Magnaporthegrisea)|Effector(plantavirulencedeterminant)|3e-55	PF07249|Cerato-platanin|3.3E-54;	-	SSF50685||1.12E-9;	-	-	-	-	-	-	-	-	-	-
g3430.t1	Dreco_g3430	MRLCPVSTILVHLLATPIVAGLAIASPATAVDFVRGPNDATKSKLENWWTVRGFNFYQSIIFHSRDNHTSSSYINFSLTHPAVPYTARCSAETGKTSGSSLSKKMLDFLYGANTYLCRVPNTGDSARFRYDSLTGELSISHIFIYPYTGVGYYNVTGSVRLNCAEDFEHEPNWTKEQVYSNRTMACTDITVKFPATKAEFWEWAV	0.519	31	0.608	31	0.95	13	0.756	0.688	Y	0.45	SignalP-noTM		extr 20, E.R. 4, plas 3	DFVRGPNDATKSKLENWWTVRGFNFYQSIIFHSRDNHTSSSYINFSLTHPAVPYTARCSAETGKTSGSSLSKKMLDFLYGANTYLCRVPNTGDSARFRYDSLTGELSISHIFIYPYTGVGYYNVTGSVRLNCAEDFEHEPNWTKEQVYSNRTMACTDITVKFPATKAEFWEWAV	174	none	0.01	cyto_nucl 13, nucl 11.5, cyto 9.5, mito 5, extr 4	cyto_nucl	Cluster01148	-	-	PF16541|Alternaria alternata allergen 1|3.6E-10;	-	-	-	-	-	-	-	-	-	-	-	-
g3478.t1	Dreco_g3478	MHLHFTTIIWTVAFAAKVNAALAADVKAVCSTLYSRYPTLLVWDPLGPEAISSILRAENYYSAHFDYWNAASSRNRPSCAFFPSNAEQVSFAVQTLNAHPAVRFALKSGGHNPNLGFSNVEKGVLIAFRPNSQFAYPSPDGQSVVVGAGCKWEDVYAVLEPLGKTAVGGRLGDVGVTGFILGGGLSYLSAQYGLACDNVVSFECVLANGTVVTASSSSHPELFFALRGGGNQYAIVTRMTLKTYDIGEHATIWGGVRTYAAGSQSEILSAVTNFTAGNRDPKAAIIPTFNYAAILGISIPVALVFFFYDGLMPPVGVFDNFDSIMPLTDNTRRRSYGSLTNMVLGGNLKGLRFQIRENTFPNMPAEAMHAFLSDHSMLMDKKSAKGAILDLIDVRLMSF…	0.603	24	0.699	24	0.94	4	0.809	0.759	Y	0.45	SignalP-noTM		extr 20, mito 3, plas 2, E.R. 2	DVKAVCSTLYSRYPTLLVWDPLGPEAISSILRAENYYSAHFDYWNAASSRNRPSCAFFPSNAEQVSFAVQTLNAHPAVRFALKSGGHNPNLGFSNVEKGVLIAFRPNSQFAYPSPDGQSVVVGAGCKWEDVYAVLEPLGKTAVGGRLGDVGVTGFILGGGLSYLSAQYGLACDNVVSFECVLANGTVVTASSSSHPELFFALRGGGNQYAIVTRMTLKTYDIGEHATIWGGVRTYAAGSQSEILSAVTNFTAGNRDPKAAIIPTFNYAAILGISIPVALVFFFYDGLMPPVGVFDNFDSIMPLTDNTRRRSYGSLTNMVLGGNLKGLRFQIRENTFPNMPAEAMHAFLSDHSMLMDKKSAKGAILDLIDVRLMSFAVQPMPRGIAQASRAHGGGGNALG…	511	none	0.14	cyto 11.5, cyto_nucl 7.5, pero 5, plas 4.5, E.R._mito 4, extr_plas 3.5, mito 3, E.R. 3, nucl 2.5	cyto	Cluster01387	D4B1P2|A2372_ARTBC|7e-61	1046|PHI:1046|CTB5|ABK64182|29003|Cercosporanicotianae|Reducedvirulence|5e-30	PF01565|FAD binding domain|3.3E-22;	PTHR11748:SF98||3.5E-96;PTHR11748:SF98||3.5E-96;PTHR11748||3.5E-96;PTHR11748||3.5E-96;	SSF56176||2.85E-44;	-	-	-	PS51387|PCMH-type FAD-binding domain profile.|16.507;	-	-	G3DSA:3.30.465.10||3.8E-12;G3DSA:3.30.43.10||7.9E-4;	-	-	-
g3480.t1	Dreco_g3480	MACCFRSISDLSLLLPVLTERPLGISTPTPGQFKAMDAFPMCFTSPSHRSSSKIYQDLISAHLLACPAPTCSHPSHDMANADALDQRRNRDSTSTPHVGIIGAGFAGLRCADILLEHGFIVTIIEGRDRIGGRVCQQRLKNGHLVDGGPNWIHGTTDNPILDLARETNTPVGSWDARACIFDESGNLFQPDEGEKLAGVMWGIILDAFKHSNTLSADIRPDETLSDFFQKRVVDVIPDTEPDFLRRRKIILQMSELWGAFVGSPVSRQSLKYFWLEECIEGENLFCPGTYKSILDAVARPALSKAEIRYNSKAKRIQYGQEGKRKVGVALESGQVLSFDEIVVTCPLGWLKRNLSAFQPPLPARLAKAIDAIGYGCLEKVYISFPKPFWLSGDGAGADD…	0.282	20	0.391	20	0.649	3	0.53	0.466	Y	0.45	SignalP-noTM		extr 10, nucl 7.5, cyto_nucl 7, cyto 5.5, pero 2	RPLGISTPTPGQFKAMDAFPMCFTSPSHRSSSKIYQDLISAHLLACPAPTCSHPSHDMANADALDQRRNRDSTSTPHVGIIGAGFAGLRCADILLEHGFIVTIIEGRDRIGGRVCQQRLKNGHLVDGGPNWIHGTTDNPILDLARETNTPVGSWDARACIFDESGNLFQPDEGEKLAGVMWGIILDAFKHSNTLSADIRPDETLSDFFQKRVVDVIPDTEPDFLRRRKIILQMSELWGAFVGSPVSRQSLKYFWLEECIEGENLFCPGTYKSILDAVARPALSKAEIRYNSKAKRIQYGQEGKRKVGVALESGQVLSFDEIVVTCPLGWLKRNLSAFQPPLPARLAKAIDAIGYGCLEKVYISFPKPFWLSGDGAGADDRKVQGFAQWLSPNYASDSNP…	559	none	0.6	cyto 12, cyto_nucl 10.3333, cyto_mito 8.83333, nucl 7.5, pero 6, mito 4.5	cyto	Cluster02102	Q8H191|PAO4_ARATH|2e-26	2227|PHI:2227|pao|D4III8|5270|Ustilagomaydis|Mixedoutcome|1e-15	PF01593|Flavin containing amine oxidoreductase|3.5E-49;	PTHR10742:SF61||1.2E-88;PTHR10742||1.2E-88;	SSF51905||1.51E-59;SSF51905||1.51E-59;SSF54373||2.09E-7;	-	-	-	-	-	-	G3DSA:3.50.50.60||4.4E-55;G3DSA:3.50.50.60||4.4E-55;G3DSA:3.50.50.60||4.4E-55;	-	-	PR00419|Adrenodoxin reductase family signature|3.8E-5;PR00419|Adrenodoxin reductase family signature|3.8E-5;
g3490.t1	Dreco_g3490	MVRPSLISILALCLSVYAAGPDPAGAKNVGNGQGKQFITGQCLSNADCASGCCAQLNGGAGVCSGVDVQFAAGKSGCGFVDAQNTPAPNIKNTQNTQNTGNTLAKTTNQKSANAKNRGEGRKGTETQQGQNSENSAQAGSTGNGSQNAAVKSDQVRNATQQEQGNRQAATGGNGKKNSVVRGTNTSRNGRKKKGAKKSSNGNKNGRNGNGNRGINKNKNANQNGNKNTNQNTNQNGNKNVNQDANQNTNQNGNKNVNQNANQNTNQNGNKNVNQNANQNTNQNGNKNVDQNANQNANQKTNQKTNQKTNQKTNQKTNQKTNQNSNKNANNGTQNANQNAGQTGSQNGNQIANKNTNQNANNQKGNRNGNRNGNHNANKNANQNGNKNSNNQNGNKNDSQ…	0.498	27	0.603	27	0.954	11	0.76	0.688	Y	0.45	SignalP-noTM		extr 19, nucl 4, plas 2	NVGNGQGKQFITGQCLSNADCASGCCAQLNGGAGVCSGVDVQFAAGKSGCGFVDAQNTPAPNIKNTQNTQNTGNTLAKTTNQKSANAKNRGEGRKGTETQQGQNSENSAQAGSTGNGSQNAAVKSDQVRNATQQEQGNRQAATGGNGKKNSVVRGTNTSRNGRKKKGAKKSSNGNKNGRNGNGNRGINKNKNANQNGNKNTNQNTNQNGNKNVNQDANQNTNQNGNKNVNQNANQNTNQNGNKNVNQNANQNTNQNGNKNVDQNANQNANQKTNQKTNQKTNQKTNQKTNQKTNQNSNKNANNGTQNANQNAGQTGSQNGNQIANKNTNQNANNQKGNRNGNRNGNHNANKNANQNGNKNSNNQNGNKNDSQNGNQNANQNGNNQNANQNANKNANQKG…	759	186 - SRNGRKKKGAKKSSNGNKNGRNGNGNR - 212	0.43	nucl 17, cyto_nucl 15, cyto 11	nucl		-	-	-	-	-	-	-	-	-	-	-	-	-	-	-
g3492.t1	Dreco_g3492	MKGSLILFSSLLTGAMAMAVPGYVVHEKRGNHPRWVKGKPLDGHTKIPVRIALKQRNLDKGMDYLLEVSDPESPKYGQHYTADEVVELFAPDEQSVQTVKDWLTSAGIPGGTIRVPKSKAWVHFDATVDQLEDVLGTRYHVYNHVESRNEHVGVDSYRLPREVAEHVEFVTPGVVFAPRTRAVGKQMKREEKLPRAKVRPMPVELAQKLRSNPERTDDCGRAITPACIKAMYNITDGKLASAGNQLGIFELDEQKYSQEDLDQFYGAYASHVPSGTGPKVDGIDGGTAPGSQDSAGAEADLDFQIGIPIVHPQGTILFQTVAQNNDIFNTFLDAVDGSYCTKSAYGETGDDPDVDGITPDEQCGAFEPAHVISFSYGSAEADYPTYYLQRQCDEFMKLG…	0.476	18	0.655	18	0.942	5	0.902	0.789	Y	0.45	SignalP-noTM		extr 20, E.R. 3, mito 1, cyto 1, pero 1, vacu 1, cyto_mito 1, cyto_pero 1	AVPGYVVHEKRGNHPRWVKGKPLDGHTKIPVRIALKQRNLDKGMDYLLEVSDPESPKYGQHYTADEVVELFAPDEQSVQTVKDWLTSAGIPGGTIRVPKSKAWVHFDATVDQLEDVLGTRYHVYNHVESRNEHVGVDSYRLPREVAEHVEFVTPGVVFAPRTRAVGKQMKREEKLPRAKVRPMPVELAQKLRSNPERTDDCGRAITPACIKAMYNITDGKLASAGNQLGIFELDEQKYSQEDLDQFYGAYASHVPSGTGPKVDGIDGGTAPGSQDSAGAEADLDFQIGIPIVHPQGTILFQTVAQNNDIFNTFLDAVDGSYCTKSAYGETGDDPDVDGITPDEQCGAFEPAHVISFSYGSAEADYPTYYLQRQCDEFMKLGLQGTTLVMSSGDDGVARR…	619	188 - KREEKLPR - 195	0.04	cyto_nucl 14.5, nucl 13.5, cyto 12.5, E.R. 2, pero 2	cyto_nucl	Cluster06351	Q70DX9|SED1_ASPFU|0	-	PF00082|Subtilase family|1.6E-6;PF09286|Pro-kumamolisin, activation domain|1.0E-41;	PTHR14218:SF19||9.5E-223;PTHR14218||9.5E-223;	SSF54897||1.7E-31;SSF52743||4.06E-49;SSF52743||4.06E-49;SSF52743||4.06E-49;	-	-	PS00138|Serine proteases, subtilase family, serine active site.|-;	PS51695|Sedolisin domain profile.|31.094;	SM00944|Pro-kumamolisin, activation domain|2.2E-35;	-	G3DSA:3.40.50.200||9.6E-98;	-	-	-
g3493.t1	Dreco_g3493	MKANIFSLVALIAVGAFALPTAKVDDELDASMPFFCPDSIDEFCHQASIRLGCTHDGDFRSHAQDLCGSCHCILW	0.434	19	0.63	19	0.96	4	0.917	0.785	Y	0.45	SignalP-noTM		extr 22, plas 3	PTAKVDDELDASMPFFCPDSIDEFCHQASIRLGCTHDGDFRSHAQDLCGSCHCILW	56	none	0.05	extr 23, nucl 6, cyto_nucl 5.5	extr		-	-	-	-	-	-	-	-	-	-	-	-	-	-	-
g3504.t1	Dreco_g3504	MSKGLPSTPFVVSLSLLSVGVVEPSISNRPCAASRITRSSHPSGGRVEFKMKAIIQRVLSASVTVDKEVVSSIGKGVLVFAAVAPGDTEKEVDTIASKVLKMKLWEDAEGGRWKQSVTDIDGEVLCVSQFTLLARTKKGTKPDFHGAMNPDEASRLYRYFVQKIGDSYAADRVKDGKFQAMMEVALVNDGPVTLELQSGSTTLEQA	0.283	25	0.428	25	0.78	2	0.656	0.551	Y	0.45	SignalP-noTM		extr 19, E.R. 3, cyto 2, golg 2	ISNRPCAASRITRSSHPSGGRVEFKMKAIIQRVLSASVTVDKEVVSSIGKGVLVFAAVAPGDTEKEVDTIASKVLKMKLWEDAEGGRWKQSVTDIDGEVLCVSQFTLLARTKKGTKPDFHGAMNPDEASRLYRYFVQKIGDSYAADRVKDGKFQAMMEVALVNDGPVTLELQSGSTTLEQA	181	none	0	mito 25, cyto 3, pero 2	mito	Cluster02027	O14274|DTD_SCHPO|6e-47	-	PF02580|D-Tyr-tRNA(Tyr) deacylase|1.0E-52;	PTHR10472||7.7E-81;	SSF69500||6.93E-54;	TIGR00256|TIGR00256: D-tyrosyl-tRNA(Tyr) deacylase|4.4E-50;	-	-	-	-	-	G3DSA:3.50.80.10||7.6E-62;	MF_00518|D-aminoacyl-tRNA deacylase [dtd].|28.857;	-	-
g3516.t1	Dreco_g3516	MKLSKLIAGAVLAALGPQVAAESTFHPARPPAAPLAVRSPYLNVWLNGRSDGGPSGYLPGSWPQFWSQAIQGWQGFVMVDGRTFNWMGGAPGGTKVDQTAFEYTSTKTTFTFTIAGKLQMSVKFLSPVYYDDLRRQSITSSYLEVSVKSLDGRSHSVQVYCDVSGEWASGDSSAIVQWETQKKEGIRYHKFFRKDQQKYKEWNQIASWGNWYWATADTADVSYQIGADTDVRGQFMDKGRLTGNVDPNFRAVNDRWPVFALSRDLGSVSDGWKSTLFTIGYTQEDAIQFQGRDMAPKDVPSLWKSYFTEDQLLPFFYKDYAYASKYASRLDKRVADDSTRAAGQDYLTMTSLAVRQTVDVIFPAFPIMLYLNPDLIVWTLDPLLENGRYHYPNDFAQHD…	0.705	22	0.704	22	0.83	2	0.698	0.701	Y	0.45	SignalP-noTM		extr 20, mito 3, pero 2, cyto_mito 2	STFHPARPPAAPLAVRSPYLNVWLNGRSDGGPSGYLPGSWPQFWSQAIQGWQGFVMVDGRTFNWMGGAPGGTKVDQTAFEYTSTKTTFTFTIAGKLQMSVKFLSPVYYDDLRRQSITSSYLEVSVKSLDGRSHSVQVYCDVSGEWASGDSSAIVQWETQKKEGIRYHKFFRKDQQKYKEWNQIASWGNWYWATADTADVSYQIGADTDVRGQFMDKGRLTGNVDPNFRAVNDRWPVFALSRDLGSVSDGWKSTLFTIGYTQEDAIQFQGRDMAPKDVPSLWKSYFTEDQLLPFFYKDYAYASKYASRLDKRVADDSTRAAGQDYLTMTSLAVRQTVDVIFPAFPIMLYLNPDLIVWTLDPLLENGRYHYPNDFAQHDLGTFPVALGHPKGDDEPMPLEE…	638	none	0.11	mito 31, cyto_mito 17	mito	Cluster06649	Q2U4L7|GTAA_ASPOR|0	-	PF16335|Domain of unknown function (DUF4965)|1.3E-52;PF08760|Domain of unknown function (DUF1793)|1.6E-61;	PTHR31987:SF1||1.1E-258;PTHR31987||1.1E-258;	-	-	-	-	-	-	-	-	-	-	-
g3544.t1	Dreco_g3544	MKSSLPSTAVAVTMLSMAMRTSAQDSPFSIDTVDATKKTASVLAWDMMQYYKGNLSGHVPGILPGPPPAGDYYWWEGGAMWGTLIDYWAWTGDSSYNDVIMQAMQFQVGEDKDYMPRNVTASLGNDDQGFWGMSAMLAAEQKFPDPPSDKPQWLALAQAVFNTQASPDRHDKTCNGGLRWQIPFANNGYNYKNSIANGCFFNLGARLYRYTGNQTYLDWAVKTWDWMEQVGFIDGTTYAIYDGANVNDDCKDINKAQFSYNNGVFAQGAAFLYNATQDAVWEQRATKLVQTGLKNFFPNGVAVEISCENVGTCTTDMLTFKGFVHRWYSVITQIMPSLAPTILPTLKKSAEAAIKQCTGGALGRQCGLKWASGTYDGKTGAGQEMAALAAVSSLLINSA…	0.694	24	0.572	24	0.699	20	0.473	0.519	Y	0.45	SignalP-noTM		extr 25	DSPFSIDTVDATKKTASVLAWDMMQYYKGNLSGHVPGILPGPPPAGDYYWWEGGAMWGTLIDYWAWTGDSSYNDVIMQAMQFQVGEDKDYMPRNVTASLGNDDQGFWGMSAMLAAEQKFPDPPSDKPQWLALAQAVFNTQASPDRHDKTCNGGLRWQIPFANNGYNYKNSIANGCFFNLGARLYRYTGNQTYLDWAVKTWDWMEQVGFIDGTTYAIYDGANVNDDCKDINKAQFSYNNGVFAQGAAFLYNATQDAVWEQRATKLVQTGLKNFFPNGVAVEISCENVGTCTTDMLTFKGFVHRWYSVITQIMPSLAPTILPTLKKSAEAAIKQCTGGALGRQCGLKWASGTYDGKTGAGQEMAALAAVSSLLINSAKVPVTEKTGGTSKGDPNAGSAGDD…	437	none	0.04	cyto 13.5, cyto_nucl 9, mito_pero 7.5, pero 7, mito 6, nucl 3.5	cyto	Cluster00066	Q75DG6|DCW1_ASHGO|1e-124	-	PF03663|Glycosyl hydrolase family 76|6.4E-151;	PTHR12145:SF23||1.3E-235;PTHR12145||1.3E-235;	SSF48208||5.44E-59;	-	-	-	-	-	-	G3DSA:1.50.10.10||1.3E-30;	-	PIRSF016302||1.6E-177;	-
g3547.t1	Dreco_g3547	MLAAALHVLALARACNADHLQVRAEPKPITGITDWSSGRPPNGINDAEWAKVMAKPDLAAVHPVMGFDTSKAYPSESRGWTVNSLCGMVSLPRTACMSRT	0.757	18	0.716	18	0.819	10	0.666	0.689	Y	0.45	SignalP-noTM		extr 11, mito 9, cyto 7	HLQVRAEPKPITGITDWSSGRPPNGINDAEWAKVMAKPDLAAVHPVMGFDTSKAYPSESRGWTVNSLCGMVSLPRTACMSRT	82	none	0.01	cyto 11, extr 10, nucl 7, cyto_mito 7	cyto		-	-	-	-	-	-	-	-	-	-	-	-	-	-	-
g3550.t1	Dreco_g3550	MRSATIFTFALANGALAARAFLNEPDTGIQDVLGGLPDGRLPELSSIVGLPDFEWVAKKYMPVRNFSYYRNGAGGEWSYRNNLEVFHRYRLRPRVLVDNWAIESTLSMTTILGHIVSAPFFISPAARAHYAHPDAKLNLVKAAGAEKIISRHLLPSLFQPALYASKTINEIAAAKKPGQGTFQQLHLSSNRSGNQELFDRAEKSGAMAIVFTVDSAADGNRHRAARFGVGSVPISSDPDYSSFTWNFYRSLTNMTRLPIILKGIMTVKGRANGGSQQGAGHHSSNHGGRQLDGSPSSLEVALEIHDRAPDVFKRTEVYADGGIRYGAYALMLEI	0.257	18	0.423	18	0.806	14	0.695	0.57	Y	0.45	SignalP-noTM		extr 19, mito 5, cyto 3	RAFLNEPDTGIQDVLGGLPDGRLPELSSIVGLPDFEWVAKKYMPVRNFSYYRNGAGGEWSYRNNLEVFHRYRLRPRVLVDNWAIESTLSMTTILGHIVSAPFFISPAARAHYAHPDAKLNLVKAAGAEKIISRHLLPSLFQPALYASKTINEIAAAKKPGQGTFQQLHLSSNRSGNQELFDRAEKSGAMAIVFTVDSAADGNRHRAARFGVGSVPISSDPDYSSFTWNFYRSLTNMTRLPIILKGIMTVKGRANGGSQQGAGHHSSNHGGRQLDGSPSSLEVALEIHDRAPDVFKRTEVYADGGIRYGAYALMLEI	316	none	0.16	cyto_nucl 17.5, nucl 15, cyto 12, extr 2	cyto_nucl	Cluster08836	P09437|CYB2_WICAO|4e-31	2570|PHI:2570|CYB2|Q6FM61|5478|Candidaglabrata|Reducedvirulence|7e-30	PF01070|FMN-dependent dehydrogenase|6.6E-18;PF01070|FMN-dependent dehydrogenase|2.0E-32;	PTHR10578:SF71||1.5E-125;PTHR10578||1.5E-125;	SSF51395||1.01E-40;	-	-	PS00557|FMN-dependent alpha-hydroxy acid dehydrogenases active site.|-;	PS51349|FMN-dependent alpha-hydroxy acid dehydrogenase domain profile.|58.712;	-	-	G3DSA:3.20.20.70||1.7E-57;	-	PIRSF000138||1.1E-60;	-
g3551.t1	Dreco_g3551	MMRTFLLAALIYTVAPVAADFLGPRYPIPIDVTSNKSAVAAYWHKITSGLETLLKHDNGYTSRERELNNTSFSLGFFSARDGQMDLLEFHHTARGVANGTRGARKVDGNTIYRINSLTQLMTMYAGLLTIKSEDWDRPLLELMPELQNNQTYSAIRRKAHSKVDATNAVPWGHISLRAVVGYLSGIPRDAVGQGNRPFVGTEDLFGHPEDPWAPPFYATERGLPSIYLNDSRDPARPVYVDLVNTIRSKTNTPWGSYLLGLANRSPTFLPWASPAVSNNGYVILGEVIRKTTGSETETTLLKNVFHPLGMTNSTTFRVKDESEALIPAGENVYKDFSSNLHISSPAFGGYSTLRDLARLGVGILNHTLLSAEETRRWMKPLSHTDRVWVSLGAPWEIMR…	0.749	20	0.822	20	0.938	3	0.897	0.862	Y	0.45	SignalP-noTM		extr 25	FLGPRYPIPIDVTSNKSAVAAYWHKITSGLETLLKHDNGYTSRERELNNTSFSLGFFSARDGQMDLLEFHHTARGVANGTRGARKVDGNTIYRINSLTQLMTMYAGLLTIKSEDWDRPLLELMPELQNNQTYSAIRRKAHSKVDATNAVPWGHISLRAVVGYLSGIPRDAVGQGNRPFVGTEDLFGHPEDPWAPPFYATERGLPSIYLNDSRDPARPVYVDLVNTIRSKTNTPWGSYLLGLANRSPTFLPWASPAVSNNGYVILGEVIRKTTGSETETTLLKNVFHPLGMTNSTTFRVKDESEALIPAGENVYKDFSSNLHISSPAFGGYSTLRDLARLGVGILNHTLLSAEETRRWMKPLSHTDRVWVSLGAPWEIMRHVDTGSNIVTDVYCKAGNSL…	590	none	0.08	nucl 16, cyto 9, mito_nucl 9	nucl	Cluster05974	D4AXL1|BLML_ARTBC|5e-27	-	PF00144|Beta-lactamase|2.0E-16;	PTHR22935:SF64||7.0E-37;PTHR22935:SF64||7.0E-37;PTHR22935||7.0E-37;PTHR22935||7.0E-37;	SSF56601||1.16E-35;SSF56601||1.16E-35;	-	-	-	-	-	-	G3DSA:3.40.710.10||6.4E-42;G3DSA:3.40.710.10||6.4E-42;	-	-	-
g3553.t1	Dreco_g3553	MKQSLALLAVVGTAMGLNEVEKKINVCFPADQLAKSDTKYPCPLLVRTMTTCKANGTSPAHLKAHQDCICKGSYIDDEFGCLECKWTHGLLGNADRKHWRAIHSAASSSLCNAPTPVADWAAIWQSVAMATPYVKADVDNELVDKEPFDSSVERYYVALDHPQGPGPFTPVPADAKPTPTSGFRTSTKSSVAALETEDDYCDDDEEEEEEADEPMTPIDFGRVGPPGIVPSLDDGLVRVKGKYEPESHGAYGNTTIVKVTIVQTYIARCCPVVQPDGLVKMSCTKDLVVPGTQDKSVSKEVLEKLPSFKSNIPAPADLHAIPAAPVPADNGANPGSHPDSPAGSRPNAPSGFRPGSHPGSPIDAEKISNVPAGSHGAPPADDEEESEPESNSYSKPEPE…	0.48	17	0.544	17	0.719	7	0.583	0.565	Y	0.45	SignalP-noTM		extr 19, golg 3, mito 2, cyto 2, cyto_mito 2	NEVEKKINVCFPADQLAKSDTKYPCPLLVRTMTTCKANGTSPAHLKAHQDCICKGSYIDDEFGCLECKWTHGLLGNADRKHWRAIHSAASSSLCNAPTPVADWAAIWQSVAMATPYVKADVDNELVDKEPFDSSVERYYVALDHPQGPGPFTPVPADAKPTPTSGFRTSTKSSVAALETEDDYCDDDEEEEEEADEPMTPIDFGRVGPPGIVPSLDDGLVRVKGKYEPESHGAYGNTTIVKVTIVQTYIARCCPVVQPDGLVKMSCTKDLVVPGTQDKSVSKEVLEKLPSFKSNIPAPADLHAIPAAPVPADNGANPGSHPDSPAGSRPNAPSGFRPGSHPGSPIDAEKISNVPAGSHGAPPADDEEESEPESNSYSKPEPEPESESESKPVPESKPVP…	491	none	0.18	cyto 8, mito 6.5, cyto_nucl 6.5, plas 5.5, nucl 5, cyto_golg 5	cyto		-	-	-	-	-	-	-	-	-	-	-	-	-	-	-
g3590.t1	Dreco_g3590	MQFKFLAVASIALSTAGPVAALPAGVTVNANAIVKTAVDLSSLTTKTVDLLKTANTGNILSVLPKVTANIKSITKTAQDSVKAIQSSADPKFAANVQYDICKTYNSLIKVEKSLAQSLIDQKSLVTPILALPLNLALAPIKGALSDLTKTVGGLVPVCNVDLKTNQKTLDDLLAKVNSLYNILKLIGF	0.731	22	0.772	22	0.901	16	0.814	0.794	Y	0.45	SignalP-noTM		extr 22, mito 1, cyto 1, plas 1, E.R. 1, vacu 1, cyto_mito 1	PAGVTVNANAIVKTAVDLSSLTTKTVDLLKTANTGNILSVLPKVTANIKSITKTAQDSVKAIQSSADPKFAANVQYDICKTYNSLIKVEKSLAQSLIDQKSLVTPILALPLNLALAPIKGALSDLTKTVGGLVPVCNVDLKTNQKTLDDLLAKVNSLYNILKLIGF	166	none	0.03	cyto 20, pero 6, plas 2, E.R._mito 2	cyto		-	-	-	-	-	-	-	-	-	-	-	-	-	-	-
g3596.t1	Dreco_g3596	MQFAALISLLVPAIAALPSQSPKSLEQANFATLEMLKQCNFLQIASSCTLLRPSHSECNTECMKCGQSSGKCVRSPDSLIDL	0.498	17	0.662	17	0.932	15	0.87	0.774	Y	0.45	SignalP-noTM		extr 21, mito 2, E.R. 2	PSQSPKSLEQANFATLEMLKQCNFLQIASSCTLLRPSHSECNTECMKCGQSSGKCVRSPDSLIDL	65	none	0.25	extr 16, nucl 8.5, cyto_nucl 8, extr_plas 8	extr		-	-	-	-	-	-	-	-	-	-	-	-	-	-	-
g3605.t1	Dreco_g3605	MTRIRRRPVALLSALFTCSSLAFESNFSFYPPKSQSCLDEAAKAAYCKGDSAREINVCLCGNGGDFIINSAKCVGQNNKADVSSVYNIMSQACSDSGTPMTVSQSEFFKAANGEDTTTAARTTSTSMKGATKTSATPVVVTSGGVTVTVTPTQTVVGGGDDKKGGLSSGATIGIAVGASVAGVAALSGLILCLLHRRKKKAQEEAHPMLSQQDYHHPSPPTTYPPTEPSPGFVAYGGAEAKTAAAWSTSSPDCSPVYKSPVQHTGPYVSPPAEAVAELPPQGVMYSQQSFATFEMDGTGRQPVAAAEMPATEPQFPGR	0.402	23	0.562	23	0.866	2	0.786	0.683	Y	0.45	SignalP-noTM		extr 17, mito 7, nucl 1, E.R. 1, golg 1	ESNFSFYPPKSQSCLDEAAKAAYCKGDSAREINVCLCGNGGDFIINSAKCVGQNNKADVSSVYNIMSQACSDSGTPMTVSQSEFFKAANGEDTTTAARTTSTSMKGATKTSATPVVVTSGGVTVTVTPTQTVVGGGDDKKGGLSSGATIGIAVGASVAGVAALSGLILCLLHRRKKKAQEEAHPMLSQQDYHHPSPPTTYPPTEPSPGFVAYGGAEAKTAAAWSTSSPDCSPVYKSPVQHTGPYVSPPAEAVAELPPQGVMYSQQSFATFEMDGTGRQPVAAAEMPATEPQFPGR	295	none	0.36	nucl 9, plas 6, cyto 6, cyto_plas 6, mito 4, pero 4, extr_plas 4, mito_pero 4	nucl	Cluster04345	-	-	-	-	-	-	-	-	-	-	-	-	-	-	-
g3614.t1	Dreco_g3614	MRQLLTLFILALIPGFLRAAEYHEQLNLRPLPLNALLASFNFRSNTSLADFEAHNFRLFPRSLGQILQYAGTRELHLRFTLGRWDAERWGARPWDGAREGGTGVELWAWLDAKTDEEADENWLTLTNALSGLFCASLNFIDGTRTIRPVVSFQPEGHHSDDALASTRLLHGVLPHEVVCTENLTPFLKLLPCKGKAGIASLLDGHRLFDASFQSMAIDVRPVCAPDGECVLQMEQTIDMVLDVNRSRRPRDNPIPRPPPVEELVCDTSKLYHDESTCYPVDHLVGQHWDFIDLFGRYMRGTCPLADAEVPPVCLHVPDALDVYSSMDVQEIRRSDGMSRCFVMTADNEFSLILAKPAMEAAKMREVVPPERPLLFAERSFTGHGQEHGGVQTILTNPGD…	0.888	20	0.891	20	0.935	2	0.89	0.891	Y	0.45	SignalP-noTM		extr 13, plas 5, E.R. 4, golg 2, nucl 1, mito 1, vacu 1, mito_nucl 1	EYHEQLNLRPLPLNALLASFNFRSNTSLADFEAHNFRLFPRSLGQILQYAGTRELHLRFTLGRWDAERWGARPWDGAREGGTGVELWAWLDAKTDEEADENWLTLTNALSGLFCASLNFIDGTRTIRPVVSFQPEGHHSDDALASTRLLHGVLPHEVVCTENLTPFLKLLPCKGKAGIASLLDGHRLFDASFQSMAIDVRPVCAPDGECVLQMEQTIDMVLDVNRSRRPRDNPIPRPPPVEELVCDTSKLYHDESTCYPVDHLVGQHWDFIDLFGRYMRGTCPLADAEVPPVCLHVPDALDVYSSMDVQEIRRSDGMSRCFVMTADNEFSLILAKPAMEAAKMREVVPPERPLLFAERSFTGHGQEHGGVQTILTNPGDGEVEFVYMESLPWFMRIYLH…	562	none	0.21	nucl 13, cyto_nucl 11.5, mito 8, cyto 6, extr 2, pero 2	nucl	Cluster05434	P38875|GPI16_YEAST|1e-107	-	PF04113|Gpi16 subunit, GPI transamidase component|7.6E-240;	PTHR12959:SF11||9.1E-196;PTHR12959||9.1E-196;PTHR12959||9.1E-196;PTHR12959:SF11||9.1E-196;	-	-	-	-	-	-	-	-	-	-	-
g3632.t1	Dreco_g3632	MQYLANALALASVALASSPPPPVGGLYQRDMATNLTLNNVVSSIGHSMMVLDQAVVKINERPEGVKQATGMLLHELKEGTRKVAQSGTLTGLEAASLQVPVSLLYQTGQKLQRDLNSKKFSIQKANGCGAVHDSLGNIHHNTRSLVSVIIARIPDEYREVAVNMVTKLEKIIQQCEQDFVDCKNANSSEKSLNKRNYGNPGVDTPSTPPSKPISNPPPSSGDGNDLDAYGTSPEINSNTKINSNTKVNADTSINTNTITETETSKAPDDTLNTIISFGKTLMSGLKAAGNLIQSSPIASGGGGANLNCPYNNAVAGGACPFANKGASAYGGGGGQSGSSFGGCPYQQR	0.373	17	0.483	17	0.788	15	0.674	0.586	Y	0.45	SignalP-noTM		extr 22, nucl 3	SPPPPVGGLYQRDMATNLTLNNVVSSIGHSMMVLDQAVVKINERPEGVKQATGMLLHELKEGTRKVAQSGTLTGLEAASLQVPVSLLYQTGQKLQRDLNSKKFSIQKANGCGAVHDSLGNIHHNTRSLVSVIIARIPDEYREVAVNMVTKLEKIIQQCEQDFVDCKNANSSEKSLNKRNYGNPGVDTPSTPPSKPISNPPPSSGDGNDLDAYGTSPEINSNTKINSNTKVNADTSINTNTITETETSKAPDDTLNTIISFGKTLMSGLKAAGNLIQSSPIASGGGGANLNCPYNNAVAGGACPFANKGASAYGGGGGQSGSSFGGCPYQQR	331	none	0.22	cyto 14, cyto_nucl 13, nucl 10, lyso 2, cysk 2, mito 1.5, E.R._mito 1.5	cyto		Q8TG42|MP1_ASPFL|4e-06	-	PF12296|Hydrophobic surface binding protein A|2.9E-11;	-	-	-	-	-	-	-	-	-	-	-	-
g3642.t1	Dreco_g3642	MLATGPAGLVAALALSATVAAGYSSAHWEARFSTFEKRSSNVSRIGNIEAFNLSVPIDHYHNDSRYEPHSHDSFNLRYWLDTSNYRDGGPVIVLHSGGKASEERLPYLQHGIASMLTKATGGIGLILEQRYEGTSMPFTKFTVENLRFLSTEQIMADAAYFAQNVVFPGLEHRNLTAPNTPWIIYGGSYGGAIAAFSRKVYPDVFCGAIASSSPTVSIDDLWQFFEAPRLFAPGDCSPTQQKMVDVIDKMLFSNDSQNELGIKQLFDLGDFMNDEFARFLMYPIGNLQLNNWDPAVTSRDFDEYCTLITSDTLVYKNAALRPEVARAIAHAGYEGLLAETLTTRMLNWVGYIRSDVDNYPSLNRTESLRTWFSNRSRKPGTDMQKDERIAWNYHRCSEL…	0.257	22	0.452	22	0.882	4	0.795	0.638	Y	0.45	SignalP-noTM		extr 17, pero 3, mito 2, cyto 2, cyto_mito 2	YSSAHWEARFSTFEKRSSNVSRIGNIEAFNLSVPIDHYHNDSRYEPHSHDSFNLRYWLDTSNYRDGGPVIVLHSGGKASEERLPYLQHGIASMLTKATGGIGLILEQRYEGTSMPFTKFTVENLRFLSTEQIMADAAYFAQNVVFPGLEHRNLTAPNTPWIIYGGSYGGAIAAFSRKVYPDVFCGAIASSSPTVSIDDLWQFFEAPRLFAPGDCSPTQQKMVDVIDKMLFSNDSQNELGIKQLFDLGDFMNDEFARFLMYPIGNLQLNNWDPAVTSRDFDEYCTLITSDTLVYKNAALRPEVARAIAHAGYEGLLAETLTTRMLNWVGYIRSDVDNYPSLNRTESLRTWFSNRSRKPGTDMQKDERIAWNYHRCSELGDFYNGASTPKDRLPVVSRAYT…	513	none	0.17	cyto 18.5, cyto_nucl 13.5, nucl 7.5, pero 2	cyto	Cluster00930	D4AYS6|A1345_ARTBC|1e-122	-	PF05577|Serine carboxypeptidase S28|2.6E-39;	PTHR11010:SF11||4.1E-94;PTHR11010||4.1E-94;	SSF53474||2.09E-12;	-	-	-	-	-	-	G3DSA:3.40.50.1820||1.3E-10;	-	-	-
g3703.t1	Dreco_g3703	MRLNPLALALAAAACVHAGPRTADVYIQPITPSSPPPPPSQLAEISYDLDALSLASVLAYEAPDIPDSASLVRIGVYDANAKQWTSGTTAASVDNFSKGYSPNILLSVDSTGDVLSVSCKGVQIDAGQTRDFGPKAIVLTQERGAQPTLNKPVVLSPEGKKMEPEQEKTFLQKYWWMIAIAVFIALSGGGSEK	0.405	19	0.543	19	0.827	3	0.724	0.641	Y	0.45	SignalP-noTM		extr 23, cyto 3	PRTADVYIQPITPSSPPPPPSQLAEISYDLDALSLASVLAYEAPDIPDSASLVRIGVYDANAKQWTSGTTAASVDNFSKGYSPNILLSVDSTGDVLSVSCKGVQIDAGQTRDFGPKAIVLTQERGAQPTLNKPVVLSPEGKKMEPEQEKTFLQKYWWMIAIAVFIALSGGGSEK	174	none	0.07	cyto_nucl 17.5, cyto 13.5, nucl 10.5, extr 3, mito 3	cyto_nucl	Cluster05903	-	-	-	PTHR39219||9.7E-29;PTHR39219:SF1||9.7E-29;	-	-	-	-	PS51257|Prokaryotic membrane lipoprotein lipid attachment site profile.|5.0;	-	-	-	-	-	-
g3736.t1	Dreco_g3736	MLLLSLLLPLLSATPAFANVEKIIFTAPASVNIPLAPPSLSDLNLHTLSPEKLSIRTSLDRVFPVDKGNSSQGEAGWVLLDNLVEGQRYEFHEPTLFDLDYYELDTVWDTPALIQSVAEYASSRWSGADAATPSKLERRSTEGGGERTASVLLVRIRAAADYFVDDVELMKNPPPVLVDLVLDPFLYNVINQSLVPTVGYLIIVGVVTWFAARWLASRLQAVAGTPGDQQRKQWKKN	0.789	19	0.825	19	0.961	7	0.841	0.834	Y	0.45	SignalP-noTM		extr 17, plas 4, E.R. 3, cyto 2	VEKIIFTAPASVNIPLAPPSLSDLNLHTLSPEKLSIRTSLDRVFPVDKGNSSQGEAGWVLLDNLVEGQRYEFHEPTLFDLDYYELDTVWDTPALIQSVAEYASSRWSGADAATPSKLERRSTEGGGERTASVLLVRIRAAADYFVDDVELMKNPPPVLVDLVLDPFLYNVINQSLVPTVGYLIIVGVVTWFAARWLASRLQAVAGTPGDQQRKQWKKN	218	none	0.09	pero 11, extr 10, nucl 4, plas 3, cyto 3, cyto_plas 3	pero	Cluster05904	-	-	-	PTHR28022||3.1E-16;	-	-	-	-	-	-	-	-	-	-	-
g3753.t1	Dreco_g3753	MWFHLLGLAHIVIPLALASIARPAPGTLQSRAGDKPGLPHDQRTTPHCSFWLDYNGSQTCAAICDVYGCSVDAFLRWNPSVGSGCTNLLAGKSYCVEAMEEPTVTSKVPSDPSNVGNPHPESPAVPIVETTTTTEPPNGIKTPSPLQPGVVGNCDKFAWVNGGDTCKSIAVKYNIPLREFLLWNSQEGEACSGLWAGTYACVSVIGYTPTPVVNAPVVGAPGNGIQTPTPTQPGMVSNCNRFRYVKPDENCIDIASNAGISFDDLARWNPSIGAACEGLWAKAYVCVGVLPAFRLKTRYHADCTGEVKNDIAVADGICINTACSVASLEIAAEGYCPEGQVQISYWEQADCSGKWFGYGYANKGQCRTAWSEGWKFKSLHFRCARKEEDCVSQQTCQFE…	0.636	19	0.782	19	0.975	4	0.961	0.878	Y	0.45	SignalP-noTM		extr 27	IARPAPGTLQSRAGDKPGLPHDQRTTPHCSFWLDYNGSQTCAAICDVYGCSVDAFLRWNPSVGSGCTNLLAGKSYCVEAMEEPTVTSKVPSDPSNVGNPHPESPAVPIVETTTTTEPPNGIKTPSPLQPGVVGNCDKFAWVNGGDTCKSIAVKYNIPLREFLLWNSQEGEACSGLWAGTYACVSVIGYTPTPVVNAPVVGAPGNGIQTPTPTQPGMVSNCNRFRYVKPDENCIDIASNAGISFDDLARWNPSIGAACEGLWAKAYVCVGVLPAFRLKTRYHADCTGEVKNDIAVADGICINTACSVASLEIAAEGYCPEGQVQISYWEQADCSGKWFGYGYANKGQCRTAWSEGWKFKSLHFRCARKEEDCVSQQTCQFEPEPANSLC	388	none	0.02	cyto 15, cyto_nucl 14.5, nucl 10, extr 5	cyto	Cluster02478	D4ALG0|LYSM1_ARTBC|3e-54	-	PF01476|LysM domain|3.0E-4;PF01476|LysM domain|1.8E-5;	PTHR21666||9.5E-53;PTHR21666||9.5E-53;PTHR21666:SF212||9.5E-53;PTHR21666:SF212||9.5E-53;	SSF54106||8.11E-7;SSF54106||3.01E-7;	-	-	-	-	SM00257|Lysin motif|0.53;SM00257|Lysin motif|11.0;SM00257|Lysin motif|0.19;	-	-	-	-	-
g3758.t1	Dreco_g3758	MLLAAVVNALLVVPVAFASSPPLPKPVLVEPKKVVDPGKPLPEIAIDPTEGLPIVVDPGQVQPQVQPPVGEPIKVVDPVPPKPQVQPPVGEPITMVDPVPPQPQIQPPVGEPIKVVDQKVVDPKLVSPQGAGPSESVHVRGFVGKLTSIVGKSNTLDASFIIKPDIGKVIKCSVKDQPSTQSGDTLSRCEDTTYQFQIAVASDYEHFRVRVFHETTSGVKLSKSGTVPTKKCEAVGKILKDRAVKACKQYQPLPLSLVKDG	0.733	19	0.806	19	0.93	14	0.884	0.848	Y	0.45	SignalP-noTM		extr 14, cyto 6, E.R. 5	SPPLPKPVLVEPKKVVDPGKPLPEIAIDPTEGLPIVVDPGQVQPQVQPPVGEPIKVVDPVPPKPQVQPPVGEPITMVDPVPPQPQIQPPVGEPIKVVDQKVVDPKLVSPQGAGPSESVHVRGFVGKLTSIVGKSNTLDASFIIKPDIGKVIKCSVKDQPSTQSGDTLSRCEDTTYQFQIAVASDYEHFRVRVFHETTSGVKLSKSGTVPTKKCEAVGKILKDRAVKACKQYQPLPLSLVKDG	242	none	0.11	cyto 17, cyto_nucl 13, nucl 5, mito 5, pero 3	cyto		-	-	-	-	-	-	-	-	-	-	-	-	-	-	-
g3763.t1	Dreco_g3763	MRTNLHRTLALALALAGAALGHDSQKPVVDKNATWMEKHMAEEHHISSWDANSFFSLHDYNADGVWQQDELRRTYGLMDPTNKDVSLERRDQIVKELMELLDTNHDGSVSRAEWDEFIAQGKTLPDMGTGPGHHGDDEFEYELHHWEKYHDDDTKLEDLTHPEDIAHFKHHEELERAEQAQDAMDLKTIIENNIPAKFQRQG	0.68	22	0.766	22	0.924	12	0.862	0.818	Y	0.45	SignalP-noTM		extr 9, mito 7.5, cyto_mito 6, cyto 3.5, nucl 3, pero 1, E.R. 1, golg 1, vacu 1	DSQKPVVDKNATWMEKHMAEEHHISSWDANSFFSLHDYNADGVWQQDELRRTYGLMDPTNKDVSLERRDQIVKELMELLDTNHDGSVSRAEWDEFIAQGKTLPDMGTGPGHHGDDEFEYELHHWEKYHDDDTKLEDLTHPEDIAHFKHHEELERAEQAQDAMDLKTIIENNIPAKFQRQG	180	none	0.16	cyto 17, extr 12	cyto	Cluster04178	O74903|YCS3_SCHPO|2e-29	-	-	PTHR19237||2.9E-51;	SSF47473||5.89E-14;	-	-	PS00018|EF-hand calcium-binding domain.|-;	PS50222|EF-hand calcium-binding domain profile.|11.305;	-	-	G3DSA:1.10.238.10||8.2E-15;	-	-	-
g3765.t1	Dreco_g3765	MAKLSTLMAILALSVATHGHPSTEEAEQAYFESRRQVVANTKHNLEKCINSPASRALRNRAVARRAARATELRQRFGIKAAAAAHVRRDSASLEKWASISHDYTASGFDLNTPTDVIFASNTTCALVPETIIGPYFVDGELLRTDITDGEPGVRTHVDFQFINIKTCEPVPELVIDVWQANSTGVYSGVSAPSQGGLKTNFGRGIQVSNSDGVVEFDTIFPGHYVGRTNHIHVMSTDQANLLLNGTFEGGTVRHIGQTYFDQSLIAAVEAVEPYVRNKQNVTSNLQDKYTGDQATPEYDPFFKHVYLGDSVDDGILVWLTIGLDLDANYNKNRTPAAHWHPGGGTDKRNGTGTLSSEL	0.491	20	0.645	20	0.896	9	0.846	0.754	Y	0.45	SignalP-noTM		extr 24, cyto_mito 2, mito 1.5, cyto 1.5	PSTEEAEQAYFESRRQVVANTKHNLEKCINSPASRALRNRAVARRAARATELRQRFGIKAAAAAHVRRDSASLEKWASISHDYTASGFDLNTPTDVIFASNTTCALVPETIIGPYFVDGELLRTDITDGEPGVRTHVDFQFINIKTCEPVPELVIDVWQANSTGVYSGVSAPSQGGLKTNFGRGIQVSNSDGVVEFDTIFPGHYVGRTNHIHVMSTDQANLLLNGTFEGGTVRHIGQTYFDQSLIAAVEAVEPYVRNKQNVTSNLQDKYTGDQATPEYDPFFKHVYLGDSVDDGILVWLTIGLDLDANYNKNRTPAAHWHPGGGTDKRNGTGTLSSEL	338	none	0.01	cyto_nucl 13, nucl 11.5, cyto 11.5, pero 5	cyto_nucl	Cluster07278	-	-	PF00775|Dioxygenase|5.4E-8;	PTHR34315||1.2E-109;PTHR34315:SF1||1.2E-109;	SSF49482||6.54E-47;	-	-	-	-	-	-	G3DSA:2.60.130.10||1.2E-44;	-	-	-
g3788.t1	Dreco_g3788	MKAFATLAAALVGLASVSSCHMEMKDPPPFRSKFNKFSKSADYDMTAPLSAAGGNYPCKGYQSLFGTAEGKPVATWVPGKSYSMTITGGASHGGGSCQAAISLDRGKTFKVIHSFIGNCPGTGESSFQFTLPSDTPSGDMIFAWTWFNQIGNREMYMNCAAITVSGGGDSKIKKVRGLSGPFSSRPNIFVANVANGCTTKEGSDVDFPQPGPDVTKNSQKIVPPTGNCPSEGGTAGGKYPVGGGARQPGNGVENNVSSPNAGNQPQPSRTPQGGYGSQPNGSRVSCGQRGRQA	0.376	20	0.565	20	0.911	4	0.845	0.716	Y	0.45	SignalP-noTM		extr 23, mito 3	HMEMKDPPPFRSKFNKFSKSADYDMTAPLSAAGGNYPCKGYQSLFGTAEGKPVATWVPGKSYSMTITGGASHGGGSCQAAISLDRGKTFKVIHSFIGNCPGTGESSFQFTLPSDTPSGDMIFAWTWFNQIGNREMYMNCAAITVSGGGDSKIKKVRGLSGPFSSRPNIFVANVANGCTTKEGSDVDFPQPGPDVTKNSQKIVPPTGNCPSEGGTAGGKYPVGGGARQPGNGVENNVSSPNAGNQPQPSRTPQGGYGSQPNGSRVSCGQRGRQA	273	none	0.17	cyto 16, extr 7, mito 5, nucl 4	cyto	Cluster00167	-	-	-	PTHR36182:SF1||1.4E-80;PTHR36182||1.4E-80;	-	-	-	-	PS51257|Prokaryotic membrane lipoprotein lipid attachment site profile.|5.0;	-	-	-	-	-	-
g3833.t1	Dreco_g3833	MRFGDCSVWFLLVQAGSLTLAQIASNSSAMHQLSTDGEFAFILEEMLSLSNNFGANTGEVLRAASRITAGDFESFHDEFKLLADGIHDQAVSINGTRFPVSAREAYFRSASYYRAADFFLHGNTSDPRIYSLWEAALDDFDRALELLPTLAQRVRVSANNFTVPVIFYEPPVRSTESDKGDSSGKQKIPTVVVGNGFDSSQEELYHFLGRSILDRGWNFVSYEGPGQPTVRRQQNLGFMANWWEVVTPVVNYLSQRPDVDVDRVALVGVSFGGTLAPLAASREHRLSAVLAIDGVTSLFASIEKQFPPEMMQLYRSGRRAAFDETLLSVMENGTYPSQLRWAIGQSLFAFDTRSPYEAFSRLGEIVADAEVLRKVTCPTFVAAGDNDSMAPGQAEEMAK…	0.336	22	0.519	22	0.873	15	0.797	0.669	Y	0.45	SignalP-noTM		extr 18, cyto 5, cyto_nucl 4.5, nucl 2, mito 2	IASNSSAMHQLSTDGEFAFILEEMLSLSNNFGANTGEVLRAASRITAGDFESFHDEFKLLADGIHDQAVSINGTRFPVSAREAYFRSASYYRAADFFLHGNTSDPRIYSLWEAALDDFDRALELLPTLAQRVRVSANNFTVPVIFYEPPVRSTESDKGDSSGKQKIPTVVVGNGFDSSQEELYHFLGRSILDRGWNFVSYEGPGQPTVRRQQNLGFMANWWEVVTPVVNYLSQRPDVDVDRVALVGVSFGGTLAPLAASREHRLSAVLAIDGVTSLFASIEKQFPPEMMQLYRSGRRAAFDETLLSVMENGTYPSQLRWAIGQSLFAFDTRSPYEAFSRLGEIVADAEVLRKVTCPTFVAAGDNDSMAPGQAEEMAKLLSDRGTYHQFKARLGAGEHCQ…	420	none	0.09	cyto_nucl 15, nucl 14, cyto 12, cysk 4	cyto_nucl	Cluster00378	-	-	PF12695|Alpha/beta hydrolase family|1.1E-12;	PTHR17630||7.9E-35;PTHR17630||7.9E-35;PTHR17630:SF54||7.9E-35;PTHR17630:SF54||7.9E-35;	SSF53474||4.29E-50;SSF53474||4.29E-50;	-	-	-	-	-	-	G3DSA:3.40.50.1820||7.3E-41;G3DSA:1.20.1440.110||6.5E-27;	-	-	-
g3845.t1	Dreco_g3845	MRLPSALQLLSAGALLHGALATPTSHPTLDDDDGKEDDTPLPLVIWHGLGDTFNSEGMQQVAALAESIHPGTFVYTISLAEQDPNADRSATFMGNVTAQLESVCAALAGHPILSTAPAVDAIGFSQGGQFLRGYIERCNTPRVRTLVTFGSQHNGIVEFKTCGDRDYLCRGAMALLRFNTWSSFVQSRLVPAQYYRDPSPDSYHSYLENSNFLADINNEREQKSEVYRKNIAGLTNFVMYMFEDDTTVIPRQTAWFHEVNDTRVIPLRERTMYKEDWLGLRALDKKGGLHFRSITGDHMQIPMQVLNDTMVEFFGPRRSRAETPSDLLVDEL	0.856	22	0.829	22	0.875	12	0.8	0.813	Y	0.45	SignalP-noTM		extr 11, nucl 5, mito 3, pero 3, cyto 2, plas 2	PTSHPTLDDDDGKEDDTPLPLVIWHGLGDTFNSEGMQQVAALAESIHPGTFVYTISLAEQDPNADRSATFMGNVTAQLESVCAALAGHPILSTAPAVDAIGFSQGGQFLRGYIERCNTPRVRTLVTFGSQHNGIVEFKTCGDRDYLCRGAMALLRFNTWSSFVQSRLVPAQYYRDPSPDSYHSYLENSNFLADINNEREQKSEVYRKNIAGLTNFVMYMFEDDTTVIPRQTAWFHEVNDTRVIPLRERTMYKEDWLGLRALDKKGGLHFRSITGDHMQIPMQVLNDTMVEFFGPRRSRAETPSDLLVDEL	310	none	0.2	cyto_nucl 12.5, cyto 11.5, nucl 10.5, cysk 9	cyto_nucl	Cluster05557	O88531|PPT1_MOUSE|1e-56	-	PF02089|Palmitoyl protein thioesterase|1.9E-53;	PTHR11247:SF8||8.4E-117;PTHR11247||8.4E-117;	SSF53474||1.57E-73;	-	-	-	-	-	-	G3DSA:3.40.50.1820||9.7E-103;	-	-	PR00414|Palmitoyl protein thioesterase signature|1.9E-9;PR00414|Palmitoyl protein thioesterase signature|1.9E-9;PR00414|Palmitoyl protein thioesterase signature|1.9E-9;
g3847.t1	Dreco_g3847	MRTGRLLLAGAGLAAAQFPSKPDGLTVLRSKFHENVTISFKEPGICETTVGVKSYAGHVHLPPGFLDDVRGEPQNYPVNTFFWFFEAREDPANAPLAIWLNGGPGASSLMGLLQENGPCFVDADSESTIPNPWSWNRHVNMLYVDEPNQVGLSYDTPTNVTVLLSDKGSRVVPTDFGGGSPSTLNLTTRAGTVSSQNPSNTVNSTAQAAHALWHFAQTFFFEFPHYKPNDDRVSLWAESYGGHYGPGFFRFFQQQNERIRNGTIEAKGAHPIHLDTLGIVNGMIDAVIQEEAYISFPFNNTYDIQVFDRSTYDELMHNFTRPGGCREQLTACQEKLAGFDAATINGMAADQRPDVCKIAPWCDMPAIRAYLEKREAGWFDIGHPLNDPFPPPHIYGYMT…	0.314	17	0.408	17	0.61	4	0.515	0.466	Y	0.45	SignalP-noTM		extr 19, mito 4, cyto 1.5, cyto_nucl 1.5	FPSKPDGLTVLRSKFHENVTISFKEPGICETTVGVKSYAGHVHLPPGFLDDVRGEPQNYPVNTFFWFFEAREDPANAPLAIWLNGGPGASSLMGLLQENGPCFVDADSESTIPNPWSWNRHVNMLYVDEPNQVGLSYDTPTNVTVLLSDKGSRVVPTDFGGGSPSTLNLTTRAGTVSSQNPSNTVNSTAQAAHALWHFAQTFFFEFPHYKPNDDRVSLWAESYGGHYGPGFFRFFQQQNERIRNGTIEAKGAHPIHLDTLGIVNGMIDAVIQEEAYISFPFNNTYDIQVFDRSTYDELMHNFTRPGGCREQLTACQEKLAGFDAATINGMAADQRPDVCKIAPWCDMPAIRAYLEKREAGWFDIGHPLNDPFPPPHIYGYMTQSSVLSALGSPVNFSAV…	594	none	0.02	cyto 19, nucl 6, extr 4	cyto	Cluster05556	Q5J6J1|SPCA_TRIRU|0	901|PHI:901|um01886||5270|Ustilagomaydis|Unaffectedpathogenicity|1e-31	PF00450|Serine carboxypeptidase|3.4E-79;	PTHR11802:SF67||6.6E-164;PTHR11802||6.6E-164;PTHR11802||6.6E-164;PTHR11802||6.6E-164;PTHR11802:SF67||6.6E-164;PTHR11802:SF67||6.6E-164;	SSF53474||4.5E-96;SSF53474||4.5E-96;	-	-	-	-	-	-	G3DSA:3.40.50.1820||1.5E-111;G3DSA:3.40.50.1820||1.5E-111;	-	-	PR00724|Carboxypeptidase C serine protease (S10) family signature|6.0E-9;PR00724|Carboxypeptidase C serine protease (S10) family signature|6.0E-9;PR00724|Carboxypeptidase C serine protease (S10) family signature|6.0E-9;PR00724|Carboxypeptidase C serine protease (S10) family signature|6.0E-9;
g3858.t1	Dreco_g3858	MMLLSIAFVAVAALVASASAHAVSCRGEVACPLNDGQLIDLLVQFQKLQKQGKGSRYYKPGVQIACADGPGASMCAFYQRGAGGNVNTAAKLVQSLLDRKCSRCGSFHPARRDVSKGELVINLVTRACCEGNCICPR	0.576	23	0.727	21	0.991	11	0.951	0.848	Y	0.45	SignalP-noTM		extr 22, plas 2, mito 1, E.R. 1, vacu 1	SCRGEVACPLNDGQLIDLLVQFQKLQKQGKGSRYYKPGVQIACADGPGASMCAFYQRGAGGNVNTAAKLVQSLLDRKCSRCGSFHPARRDVSKGELVINLVTRACCEGNCICPR	114	none	0.16	extr 26, cyto 4	extr	Cluster03328	-	-	PF09044|Kp4|7.7E-21;	-	SSF55221||9.94E-18;	-	-	-	-	-	-	G3DSA:3.30.430.10||5.6E-22;	-	-	-
g3895.t1	Dreco_g3895	MLTLRSLGALGAFVAVAKGCEKDPMLEDCEYNPYVKVEYQPVVSVCRSGERITTANLCTFTREHTRSAFKPVPTNDDWEHARKNRKHDDNREKPNPCTYGHTYSCCHVLTRNQCGVSQEECVVYEEEKKRPKKHHPEIGSNPCTWGPSYWCSCPSHLTECNVPPSVCKDKIGEDPCTEGPAFWCSSPARMRQCRATQADCDELIGSDPCTWGPAYWCSSPKHMAQCKVSPADCASFTSTATGRPTNTAIGGNPCTEGPAYWCSSPAHMRECGVTPEICARYTSTATATATTTAIGSNPCTEGPAYWCSSPEHQIDYVWSHLRSHLRCYLRCHLWSHFRCHFRCHLWSHIRRDERCYLRWHFRCHVGWHLRCHLRWYIGCHLRRYVGCYLCRYVGRHLRR…	0.379	20	0.511	20	0.826	1	0.666	0.595	Y	0.45	SignalP-noTM		extr 11, nucl 4, mito 4, mito_nucl 4, cyto 3, plas 3	EKDPMLEDCEYNPYVKVEYQPVVSVCRSGERITTANLCTFTREHTRSAFKPVPTNDDWEHARKNRKHDDNREKPNPCTYGHTYSCCHVLTRNQCGVSQEECVVYEEEKKRPKKHHPEIGSNPCTWGPSYWCSCPSHLTECNVPPSVCKDKIGEDPCTEGPAFWCSSPARMRQCRATQADCDELIGSDPCTWGPAYWCSSPKHMAQCKVSPADCASFTSTATGRPTNTAIGGNPCTEGPAYWCSSPAHMRECGVTPEICARYTSTATATATTTAIGSNPCTEGPAYWCSSPEHQIDYVWSHLRSHLRCYLRCHLWSHFRCHFRCHLWSHIRRDERCYLRWHFRCHVGWHLRCHLRWYIGCHLRRYVGCYLCRYVGRHLRRHLRCYFGRNLCCDDRCHFGR…	478	129 - KRPK - 132	0.46	nucl 15, cyto_nucl 14.5, cyto 12, extr 5	nucl		-	-	PF02199|Saposin A-type domain|6.6E-5;PF02199|Saposin A-type domain|3.1E-6;PF02199|Saposin A-type domain|4.9E-5;	-	-	-	-	-	PS51110|Saposin A-type domain profile.|8.528;PS51110|Saposin A-type domain profile.|6.837;PS51110|Saposin A-type domain profile.|
g3909.t1	Dreco_g3909	MRPSELVLLVHAAALGLPWAGALGVPDSNAGAAARSGDGLAGMPIRSPRCQGTDAHPGLVAPRHLGYPLVASHQRSHAYVGAAARVASIHGRSEHETDGDADGERDVGFDDTNYVGTSGPTTSSGGSAGRDQVVPSTDIFTWLYRMDYPADCFFVMTAALLGTSIAEIYEITGMPEPRRGPGNGIDEADMHVAIERLGLSYRMYTFRGIEEFQPSGPIRHVHCRWNTVAFPRRGLPRRLAVTILTVDGLFHILLATNVGTPYARFTDLRPGRVGVDRTRLVRNSRVCEYIFVDFDASAGSFVQAQRPRVRQMNRDAQVEAQHAEAAARISPPVQYEPVPGMAVDPHDGTVNLASLPPQLTSRIFADLLTPDQCAILLALGVTAASGPLGRRSISGASLP…	0.595	25	0.673	25	0.916	14	0.762	0.721	Y	0.45	SignalP-noTM		extr 17, cyto 3, plas 3, mito 2, pero 2	PDSNAGAAARSGDGLAGMPIRSPRCQGTDAHPGLVAPRHLGYPLVASHQRSHAYVGAAARVASIHGRSEHETDGDADGERDVGFDDTNYVGTSGPTTSSGGSAGRDQVVPSTDIFTWLYRMDYPADCFFVMTAALLGTSIAEIYEITGMPEPRRGPGNGIDEADMHVAIERLGLSYRMYTFRGIEEFQPSGPIRHVHCRWNTVAFPRRGLPRRLAVTILTVDGLFHILLATNVGTPYARFTDLRPGRVGVDRTRLVRNSRVCEYIFVDFDASAGSFVQAQRPRVRQMNRDAQVEAQHAEAAARISPPVQYEPVPGMAVDPHDGTVNLASLPPQLTSRIFADLLTPDQCAILLALGVTAASGPLGRRSISGASLPEDGTKVHVNGCARLRAIVMESKDVS…	714	none	0.12	cyto 14.5, cyto_nucl 11.5, nucl 7.5, mito 5, mito_pero 5, pero 3	cyto	Cluster00138	-	-	-	-	-	-	-	-	-	-	-	-	-	-	-
g3912.t1	Dreco_g3912	MPRLTPSVALLLQAYAVSSSVIDVRADGSSIDRRDIFGQVAPRDVFKANPTCPTERAAFKEFQRANKGEALDNLLYGCTPPTLRGQLYPTFDDSNQNTIAGRGVDSNTVEETGKSSQSCNDITRAWGCVRGLDCRYVQTCSRRSLKELHGGGTIKLGDRETVPCAKGTVPREMHCKISTNPAAAAEVAFDRLIFELIMDDGQPASGKIRAEVGNGQSVSIFDGSLSKNRAIIPVNIPSLFGGETRFSLQQVMGNHVKLYYDPKSGGDDAFKIKSFTLFARLAGTNLVFQTMPLVDQKFDAGRGHTEIWSHQLDLEGWNTVAGVEKPISPFLCLSTETSEECSARLRYG	0.331	20	0.458	20	0.72	12	0.634	0.553	Y	0.45	SignalP-noTM		extr 19, mito 4, cyto 3.5	VIDVRADGSSIDRRDIFGQVAPRDVFKANPTCPTERAAFKEFQRANKGEALDNLLYGCTPPTLRGQLYPTFDDSNQNTIAGRGVDSNTVEETGKSSQSCNDITRAWGCVRGLDCRYVQTCSRRSLKELHGGGTIKLGDRETVPCAKGTVPREMHCKISTNPAAAAEVAFDRLIFELIMDDGQPASGKIRAEVGNGQSVSIFDGSLSKNRAIIPVNIPSLFGGETRFSLQQVMGNHVKLYYDPKSGGDDAFKIKSFTLFARLAGTNLVFQTMPLVDQKFDAGRGHTEIWSHQLDLEGWNTVAGVEKPISPFLCLSTETSEECSARLRYG	328	none	0.19	cyto 12, cyto_nucl 11, nucl 6, cysk 5, E.R. 3, mito 2, lyso 2	cyto	Cluster12786	-	-	-	-	-	-	-	-	-	-	-	-	-	-	-
g3913.t1	Dreco_g3913	MLRLTASVALLLQATVVSSSVIDGRADGSGIDRRDIFGRVVPRDVFKANPTCPTDREAFKAHKAANKVEALDELLYGCMPRSLRGQLYPSFDDSNQNTLDDGDGNSIARRGVDSNTVQEKQKSTQSCEEITRAWGCVRGLDCHYSQACRKSGLQSLHREILKLDGAELIPCGNQPKPREMHCRMLRNPVAAEEVMFDRLSIDIVLGGGKGDAPAGKIFAEVGGSARASIFDGVFNENEAMVPINVPEMFDGESEFSLKQVMQHRVKLHYLPAGSRGGELIQIRSLTMFARLKGTNILFNTTPLRDQKFQSARGGSVLWSHQLDFGGWNAVVGFQKPPSPFQCLSTESMDECSDRLRYG	0.557	20	0.699	20	0.927	2	0.873	0.793	Y	0.45	SignalP-noTM		extr 20, plas 3, golg 2	VIDGRADGSGIDRRDIFGRVVPRDVFKANPTCPTDREAFKAHKAANKVEALDELLYGCMPRSLRGQLYPSFDDSNQNTLDDGDGNSIARRGVDSNTVQEKQKSTQSCEEITRAWGCVRGLDCHYSQACRKSGLQSLHREILKLDGAELIPCGNQPKPREMHCRMLRNPVAAEEVMFDRLSIDIVLGGGKGDAPAGKIFAEVGGSARASIFDGVFNENEAMVPINVPEMFDGESEFSLKQVMQHRVKLHYLPAGSRGGELIQIRSLTMFARLKGTNILFNTTPLRDQKFQSARGGSVLWSHQLDFGGWNAVVGFQKPPSPFQCLSTESMDECSDRLRYG	338	none	0.28	cyto 16, cyto_nucl 11, mito 5, nucl 4, extr 3, E.R._mito 3, mito_pero 3	cyto	Cluster12786	-	-	-	-	-	-	-	-	-	-	-	-	-	-	-
g3931.t1	Dreco_g3931	MYTSMHLRLTSMHLRLGVIGLMVAATTATNTSPAADGSAMFYCGVEDHSHRPEMQGLQKREWIEDDGRFLELDAVVHLCCPPGVDCPTGESVSLQMDLVAKKYKQADIGFRLVTAHRITQDPWCHTNTLRDTKGMNEFRRRHHQGGPSTANIYYMPYLEGSWKGICYMPSMDSNITEVLGDLDGCIVAMDTLPGRSHGYNPPAEQKGGCSGFFGCFWHWFTSRSIDELTLTSRSLEESEPTSRNMVKESDPSSRSVRRAPQGQDAHENAFFHLTTVHELGHFLSLPHWNRTENNIMVASYDLVNHFVYDFDDEQIPILRQMAMKRLHELDPNYAPKQNSQWQPQRQKQSKWQWNGHSQDKDEHQHQGQGQGQGQGQNKNGPSSCKPKEGLPQTIHCPGF…	0.541	29	0.648	29	0.917	16	0.764	0.711	Y	0.45	SignalP-noTM		extr 13, mito 7, nucl 3.5, cyto_nucl 2.5, plas 1, golg 1, vacu 1	NTSPAADGSAMFYCGVEDHSHRPEMQGLQKREWIEDDGRFLELDAVVHLCCPPGVDCPTGESVSLQMDLVAKKYKQADIGFRLVTAHRITQDPWCHTNTLRDTKGMNEFRRRHHQGGPSTANIYYMPYLEGSWKGICYMPSMDSNITEVLGDLDGCIVAMDTLPGRSHGYNPPAEQKGGCSGFFGCFWHWFTSRSIDELTLTSRSLEESEPTSRNMVKESDPSSRSVRRAPQGQDAHENAFFHLTTVHELGHFLSLPHWNRTENNIMVASYDLVNHFVYDFDDEQIPILRQMAMKRLHELDPNYAPKQNSQWQPQRQKQSKWQWNGHSQDKDEHQHQGQGQGQGQGQNKNGPSSCKPKEGLPQTIHCPGFPDDLSCLNNAWGSGGGDGAADDLALIYVI…	424	none	0.59	nucl 17.5, cyto_nucl 16.5, cyto 12.5	nucl		E4V4I7|MEP6_ARTGP|8e-13	-	-	-	SSF55486||2.69E-6;SSF55486||2.69E-6;	-	-	-	-	-	-	G3DSA:3.40.390.10||3.0E-4;	-	-	-
g3940.t1	Dreco_g3940	MKWYSLVAAIAAVTTAQEPPLLPINHLAIRAAADFNPTDSASEACFTAVSKVRECVSLVGDVEIITAASSILECACCLTGSQRPTPMADAYSSCSDYLSSRAPLLTSAYPPYGDLYSICKKSAACGKGMTATRTPMVTGTATPRREVTTIFSLPLGTHTESIGPLIPACSSMFGFYVSCAEHVSNFDNLPYGEQAPCYCCVVNRGATIWTDELDKHAQTCRNWASSGAPTIIYEVASTFASFCKTFSNACVSPTRTSAVTMATLTDVMNMGGTGRVQSVPTSASTSRSAAASNLRLSPAAGSAAGSAALAVALAAAVF	0.551	17	0.505	17	0.593	2	0.425	0.462	Y	0.45	SignalP-noTM		extr 16, mito 7, plas 4	EPPLLPINHLAIRAAADFNPTDSASEACFTAVSKVRECVSLVGDVEIITAASSILECACCLTGSQRPTPMADAYSSCSDYLSSRAPLLTSAYPPYGDLYSICKKSAACGKGMTATRTPMVTGTATPRREVTTIFSLPLGTHTESIGPLIPACSSMFGFYVSCAEHVSNFDNLPYGEQAPCYCCVVNRGATIWTDELDKHAQTCRNWASSGAPTIIYEVASTFASFCKTFSNACVSPTRTSAVTMATLTDVMNMGGTGRVQSVPTSASTSRSAAASNLRLSPAAGSAAGSAALAVALAAAVF	301	none	0.16	cyto 9, E.R._mito 6.66667, mito_pero 5.83333, plas 5.5, E.R. 5, pero 5, mito 4, extr_plas 3.5	cyto		-	-	-	-	-	-	-	-	-	-	-	-	-	-	-
g3999.t1	Dreco_g3999	MVLLSLILSLATSALAALPTVKGRCVEAVAGAFLFELNDGYGQDALDKFIGVVGTKRTGLNYKLFKAISIQMKDTKNADRMAAIVAQDAAVKDFYPVCRYRRAEQKDAWSDVGPTAAHLTDMQKRAPGSKSVRIAMVDSGANFTHQDLGGCYGLGCRIAFGRDMVGNFTGTGVPKPSDDPPMDDAYSHGTHIAGILIAQPNHLGFVGVVPDATLGVYSVTGPSGISGGTETYIAAFLQAYEDDADVITSSFGAPGAWPEDPWAIVTGRIVEAGVPCIVAAGNDGSAGLFYPDKPGNGKGVVSAAIFQNTVIPQIRYKVKYSIGSGEDVDFGYMPGDPYNWDGVTLDVYATSTDMTVEGDACSKLPEDTPDLSEKIVLIRYSTCCANILATNAVAKGAKY…	0.778	17	0.867	17	0.988	9	0.961	0.918	Y	0.45	SignalP-noTM		extr 26	LPTVKGRCVEAVAGAFLFELNDGYGQDALDKFIGVVGTKRTGLNYKLFKAISIQMKDTKNADRMAAIVAQDAAVKDFYPVCRYRRAEQKDAWSDVGPTAAHLTDMQKRAPGSKSVRIAMVDSGANFTHQDLGGCYGLGCRIAFGRDMVGNFTGTGVPKPSDDPPMDDAYSHGTHIAGILIAQPNHLGFVGVVPDATLGVYSVTGPSGISGGTETYIAAFLQAYEDDADVITSSFGAPGAWPEDPWAIVTGRIVEAGVPCIVAAGNDGSAGLFYPDKPGNGKGVVSAAIFQNTVIPQIRYKVKYSIGSGEDVDFGYMPGDPYNWDGVTLDVYATSTDMTVEGDACSKLPEDTPDLSEKIVLIRYSTCCANILATNAVAKGAKYIILYDVKPSVTLDLNDV…	841	none	0.04	cyto 15, cyto_nucl 12.3333, cyto_pero 10.5, nucl 6.5, mito 5, pero 4.5	cyto	Cluster00057	P29141|SUBV_BACSU|6e-22	-	PF00082|Subtilase family|7.0E-32;PF06280|Fn3-like domain|6.8E-17;	PTHR10795||8.9E-56;PTHR10795:SF363||8.9E-56;PTHR10795:SF363||8.9E-56;PTHR10795:SF363||8.9E-56;PTHR10795||8.9E-56;PTHR10795||8.9E-56;	SSF52743||5.76E-53;SSF52743||5.76E-53;	-	-	PS00138|Serine proteases, subtilase family, serine active site.|-;	-	-	-	G3DSA:3.40.50.200||6.1E-53;G3DSA:3.40.50.200||6.1E-53;G3DSA:3.50.30.30||2.8E-4;	-	-	PR00723|Subtilisin serine protease family (S8) signature|1.2E-13;PR00723|Subtilisin serine protease family (S8) signature|1.2E-13;PR00723|Subtilisin serine protease family (S8) signature|1.2E-13;
g4017.t1	Dreco_g4017	MKLKVLVVSWLAAGAAAQDSSMHAVGLPVKRTPSTRKCTSRFPGYNIGQLKRAKWRSTDIGGFADVSTCNTGSGIIQAYTCSYRDPSSLDLIRCQYRLDGTLIQKCNGRNSYQSCKPLGEEPEPSRSKDQCERKKARLGGICDVYSDVGSIIGKFCPISRSIEDVFATSLQSVAVAVQGLTKQNTEGDQRLNEAKVKFFTALGLTIGVGVAAVAAPEAAFLASAFRIYQGVCAGLTGFSIAASSCDLLYSKYNLIEDCNKLKRREEPQHVNLGYGRSLFIRAEESVCTSFIENFLPKAEDCMNRLPKPDCGITVAQYMEAGATESEATVLFNNCPTLFTLKDNFDKVCEIREALVDFLPFCVPGPDIGNNTTDRPSNTTTTSGNNSTSSGSGSNNGDSG…	0.694	18	0.758	18	0.884	15	0.824	0.794	Y	0.45	SignalP-noTM		extr 26	DSSMHAVGLPVKRTPSTRKCTSRFPGYNIGQLKRAKWRSTDIGGFADVSTCNTGSGIIQAYTCSYRDPSSLDLIRCQYRLDGTLIQKCNGRNSYQSCKPLGEEPEPSRSKDQCERKKARLGGICDVYSDVGSIIGKFCPISRSIEDVFATSLQSVAVAVQGLTKQNTEGDQRLNEAKVKFFTALGLTIGVGVAAVAAPEAAFLASAFRIYQGVCAGLTGFSIAASSCDLLYSKYNLIEDCNKLKRREEPQHVNLGYGRSLFIRAEESVCTSFIENFLPKAEDCMNRLPKPDCGITVAQYMEAGATESEATVLFNNCPTLFTLKDNFDKVCEIREALVDFLPFCVPGPDIGNNTTDRPSNTTTTSGNNSTSSGSGSNNGDSGSNNGDSGSNNGDSGSTKD…	569	none	0.52	plas 13, mito 7, nucl 6, cyto 3	plas		-	-	-	-	-	-	-	-	-	-	-	-	-	-	-
g4028.t1	Dreco_g4028	MRLSTTLLLASALCAHATPTATRAGPRLAPSKVRRGQMPDGTRVALPATQVANFGDPNTAGVFLRGEDRNPAHVFELGFAPRGDDANLQHHLSFAGNSAYVSVTRSRRTARNYAFGRRGGSGEGSVGFVYVIYPDRMPDGYWIPHIYPADRAVHLNWEFAVAGAIPPSAIHGAFAFRPDEPDPFSYVVNPNYEPGRAGAYDPSLDFSMRQAHSILFVGCAAMVLGSHARLPRSVPEIGADAGGRGDAHDAAAVAVSKPYRREEGVNGRCDAVVGAWVANHGLACEHAAGQGTCKLRVVTAEDSKDRFDHLNVRLELSDDWWAGAYGRIGIHFGRPSANVTLFRSPDGGSFAQMNVNVTRIFGTDRPSLRSLERLVITQHLHGSQFNDQFEIRGILLRAH…	0.331	18	0.541	18	0.929	2	0.874	0.721	Y	0.45	SignalP-noTM		extr 13, mito 11, cyto 2	PTATRAGPRLAPSKVRRGQMPDGTRVALPATQVANFGDPNTAGVFLRGEDRNPAHVFELGFAPRGDDANLQHHLSFAGNSAYVSVTRSRRTARNYAFGRRGGSGEGSVGFVYVIYPDRMPDGYWIPHIYPADRAVHLNWEFAVAGAIPPSAIHGAFAFRPDEPDPFSYVVNPNYEPGRAGAYDPSLDFSMRQAHSILFVGCAAMVLGSHARLPRSVPEIGADAGGRGDAHDAAAVAVSKPYRREEGVNGRCDAVVGAWVANHGLACEHAAGQGTCKLRVVTAEDSKDRFDHLNVRLELSDDWWAGAYGRIGIHFGRPSANVTLFRSPDGGSFAQMNVNVTRIFGTDRPSLRSLERLVITQHLHGSQFNDQFEIRGILLRAHHVESGLHLEVAKYRAVET…	453	none	0.13	nucl 16, mito 13	nucl	Cluster05383	-	-	-	-	SSF56399||4.39E-16;	-	-	-	-	-	-	G3DSA:3.90.210.10||3.2E-23;	-	-	-
g4046.t1	Dreco_g4046	MSASFPRLRVAVLVAALAFLSPFAAADQKPLAKYGKGSGNPFDDDFARFANETLHRWHVPGLSIAVVDGQDIYAKGYGFASLPAMPARPETLWYAASTTKAFTAAVLSHLIHADEHEALARGWDTPIASIIRDDFVLQDEWATAHVTLEDAVSHRTGMPRHDITSRHLVDGRAARPRDIVRNLRNLPLTAEPRVRFQYCNLMYVALSHVVETLTGRWLGRVLGDTIWAPLGMNATYFDLDDALAAPTGRLAQGYWWSDADAAFREVPRMPVTEASGAGAVFSTVLDYARWVRSLLREAGPLSPAVHRDIKTPRIVVAMPSNGRDVETYGLGWERSAYRGQPMYTHSGGNHGFGAEVYWFPDIGYGVVAFANTAMTSNAAEEALIFALVDAKLGIAPEDR…	0.792	27	0.839	27	0.959	15	0.886	0.864	Y	0.45	SignalP-noTM		extr 17, plas 5, E.R. 3	QKPLAKYGKGSGNPFDDDFARFANETLHRWHVPGLSIAVVDGQDIYAKGYGFASLPAMPARPETLWYAASTTKAFTAAVLSHLIHADEHEALARGWDTPIASIIRDDFVLQDEWATAHVTLEDAVSHRTGMPRHDITSRHLVDGRAARPRDIVRNLRNLPLTAEPRVRFQYCNLMYVALSHVVETLTGRWLGRVLGDTIWAPLGMNATYFDLDDALAAPTGRLAQGYWWSDADAAFREVPRMPVTEASGAGAVFSTVLDYARWVRSLLREAGPLSPAVHRDIKTPRIVVAMPSNGRDVETYGLGWERSAYRGQPMYTHSGGNHGFGAEVYWFPDIGYGVVAFANTAMTSNAAEEALIFALVDAKLGIAPEDRVDVDKKWRDIMAGAQHMLDNALDDIYP…	523	none	0.01	cyto 19, cyto_nucl 15, nucl 7, extr 2, mito 2, pero 2, mito_pero 2	cyto	Cluster00382	Q6GDZ1|FLP_STAAR|2e-13	-	PF00144|Beta-lactamase|5.0E-49;	PTHR22935||4.8E-66;PTHR22935:SF68||4.8E-66;	SSF56601||5.98E-61;	-	-	-	-	-	-	G3DSA:3.40.710.10||4.7E-73;	-	-	-
g4056.t1	Dreco_g4056	MMRILFLLGLATLSLSRIEKKRFDWASITPSRDLEYYPCYDAFKCARLILPLDWLNASDTRTIALAVIKLPALVANSDATFAGPILTNPGGPGGSGVDFLKYFGHRLRNIVDEPGKRHYEIVSFDPRGISNSWPRTDCFPGDMLARDALRLEMRGSGPLDGSSGAVPYMLGLQDAFGQRCRAAESEGLNGGHIMEFASTPSVARDMVEMVDKMAELRKREGQGDDGRGAELRKRHDRHDDDEDDVPRLQYIGFSYGTILGNYFASMFPERIGRLVLDGVANADDYSNGPGWLTNLVDSDKIVNAFFSGCHSAGRHVCPLVRDGDESGSDIEARFHVFLSAIDEDPISGMTAAGMPVVVRSRDVREVMGSVLYRPLQQFKLLASALDGLMTGNATQFIKK…	0.432	17	0.605	17	0.884	1	0.833	0.728	Y	0.45	SignalP-noTM		extr 15, mito 9, plas 2	IEKKRFDWASITPSRDLEYYPCYDAFKCARLILPLDWLNASDTRTIALAVIKLPALVANSDATFAGPILTNPGGPGGSGVDFLKYFGHRLRNIVDEPGKRHYEIVSFDPRGISNSWPRTDCFPGDMLARDALRLEMRGSGPLDGSSGAVPYMLGLQDAFGQRCRAAESEGLNGGHIMEFASTPSVARDMVEMVDKMAELRKREGQGDDGRGAELRKRHDRHDDDEDDVPRLQYIGFSYGTILGNYFASMFPERIGRLVLDGVANADDYSNGPGWLTNLVDSDKIVNAFFSGCHSAGRHVCPLVRDGDESGSDIEARFHVFLSAIDEDPISGMTAAGMPVVVRSRDVREVMGSVLYRPLQQFKLLASALDGLMTGNATQFIKKMEARGSLPSLRDSCQSN…	598	none	0.43	nucl 21.5, cyto_nucl 16.5, cyto 8.5	nucl	Cluster00486	P65822|Y2247_MYCBO|3e-18	-	PF00561|alpha/beta hydrolase fold|1.1E-10;PF08386|TAP-like protein|1.6E-19;	PTHR10992||4.4E-40;PTHR10992||4.4E-40;PTHR10992:SF863||4.4E-40;PTHR10992:SF863||4.4E-40;PTHR10992:SF863||4.4E-40;PTHR10992||4.4E-40;PTHR10992||4.4E-40;PTHR10992:SF863||4.4E-40;PTHR10992:SF863||4.4E-40;PTHR10992:SF863||4.4E-40;PTHR10992||4.4E-40;PTHR10992||4.4E-40;	SSF53474||4.39E-16;SSF53474||4.39E-16;SSF53474||4.39E-16;SSF53474||4.39E-16;	-	-	-	-	-	-	G3DSA:3.40.50.1820||1.2E-33;G3DSA:3.40.50.1820||1.2E-33;G3DSA:3.40.50.1820||1.2E-33;	-	-	-
g4057.t1	Dreco_g4057	MRSATTFGVVVAATLMPHVIAQAPSYGQGSFIPSIDIVLTGSSSPDGSGSDTEQSSQPEGPWNGDANSNLGNVPGGASGDPTCVMEGTTTVFVTVYPSRATPTGNGSSAGGPSPGSSPPGGSLPGGPLPGGSLPGGSSPGSSSSGGSSPGGPFPGGSFPGGSSPGGTVPGGNSPAGNSPGGSSPGGSSPYGSSPAGGSGSNQVSNANYPTITIRVSPFISAQTIQTFPSPFTTLTIDIWGDGSASGLPIGPPSDESPAIGPGGYDGHNGFPTSNPAAVSVASPLGTGLAAGANGPPQGSVNAPITPGSPQNGSPQNGSPQNGSPWYTVVTDSSIQWVQGSAGPSPVAVLSAHTITLGTGAANAPGSNSGNLNGGSALACITTTGPDGRPTVFEWPAGNS…	0.59	22	0.614	22	0.853	19	0.635	0.625	Y	0.45	SignalP-noTM		extr 26	APSYGQGSFIPSIDIVLTGSSSPDGSGSDTEQSSQPEGPWNGDANSNLGNVPGGASGDPTCVMEGTTTVFVTVYPSRATPTGNGSSAGGPSPGSSPPGGSLPGGPLPGGSLPGGSSPGSSSSGGSSPGGPFPGGSFPGGSSPGGTVPGGNSPAGNSPGGSSPGGSSPYGSSPAGGSGSNQVSNANYPTITIRVSPFISAQTIQTFPSPFTTLTIDIWGDGSASGLPIGPPSDESPAIGPGGYDGHNGFPTSNPAAVSVASPLGTGLAAGANGPPQGSVNAPITPGSPQNGSPQNGSPQNGSPWYTVVTDSSIQWVQGSAGPSPVAVLSAHTITLGTGAANAPGSNSGNLNGGSALACITTTGPDGRPTVFEWPAGNSQVNGGQPLSISAGLATNFPPRG…	1483	none	0.26	nucl 20, cyto_nucl 17.5, cyto 11	nucl	Cluster04271	-	-	-	-	-	-	-	-	-	-	-	-	-	-	-
g4070.t1	Dreco_g4070	MKFTSAIAAIALGLASVSVASPTPDDGFTVDPRDNILEPRKGCSGQRTNEDKCSGRRLGPQNSFHNCKNRDGKCCAKNKDGSGGLDASRGVGREDCGYCFTGKCKA	0.474	21	0.645	21	0.917	11	0.875	0.769	Y	0.45	SignalP-noTM		extr 25	PTPDDGFTVDPRDNILEPRKGCSGQRTNEDKCSGRRLGPQNSFHNCKNRDGKCCAKNKDGSGGLDASRGVGREDCGYCFTGKCKA	85	none	0.2	extr 27, mito 4	extr	Cluster06419	-	-	-	-	-	-	-	-	-	-	-	-	-	-	-
g4071.t1	Dreco_g4071	MLWTKALLPLLLGICHGGIVPEDGLVRRNPPGANGGSFVFRGDFRSPREIRADGGFQPRGDGWQNSNDAYSISRHYRSGPSGCSLDGFWDDGFNYQTAFVSMARERTTSELYGEWFYEIHATPNILDDGYPEGEVFALGGAHWRQIRRYGRMRNGRIDEADLMPNPEYDRERYERSAWASRCYVSTDFPPELEDGEGEDGDVDAALHAANEWMDSEEMHAILGTFPLAFESLPPRQDIPGPSSGHGSADDSGESEAGDAIRYYMDLGPDLLDALYPEGHRLVQEIFQGINPGDCSLGFLSKRAGAGAKPTGRNKGRAKTGRCCKKLAAFRKKIQTLPGVLPRECTHFDELKLGVQLGDGAYQGTWDTLVLAFGDGEEHTIASSPDPGFHEWQDIKLNET…	0.474	18	0.651	18	0.921	2	0.892	0.781	Y	0.45	SignalP-noTM		extr 11, cyto 5.5, mito 4, cyto_nucl 4, pero 2, nucl 1.5	IVPEDGLVRRNPPGANGGSFVFRGDFRSPREIRADGGFQPRGDGWQNSNDAYSISRHYRSGPSGCSLDGFWDDGFNYQTAFVSMARERTTSELYGEWFYEIHATPNILDDGYPEGEVFALGGAHWRQIRRYGRMRNGRIDEADLMPNPEYDRERYERSAWASRCYVSTDFPPELEDGEGEDGDVDAALHAANEWMDSEEMHAILGTFPLAFESLPPRQDIPGPSSGHGSADDSGESEAGDAIRYYMDLGPDLLDALYPEGHRLVQEIFQGINPGDCSLGFLSKRAGAGAKPTGRNKGRAKTGRCCKKLAAFRKKIQTLPGVLPRECTHFDELKLGVQLGDGAYQGTWDTLVLAFGDGEEHTIASSPDPGFHEWQDIKLNETFGTGAVAVDHIGKVEIKQ…	612	302 - RAGAGAKPTGRNKGRAKTG - 320	0.2	cyto 21.5, cyto_nucl 14.5, nucl 4.5, pero 4	cyto		A2PU44|CHELT_VIBCL|4e-06	-	PF01375|Heat-labile enterotoxin alpha chain|8.6E-9;	-	SSF56399||2.45E-13;	-	-	-	-	-	-	G3DSA:3.90.210.10||4.1E-26;	-	-	-
g4083.t1	Dreco_g4083	MKFLANILLLGALIAPVLGQRACQTDSDCGQCIGGGPRRNHCQANPRQECRNDNDCGQCIAGGPRGRHCQNTKLPCRVDADCGQCIIGPPPRNFCQANPRRDCRVDADCGKCFRNKCQ	0.886	20	0.917	20	0.98	12	0.95	0.935	Y	0.45	SignalP-noTM		extr 27	RACQTDSDCGQCIGGGPRRNHCQANPRQECRNDNDCGQCIAGGPRGRHCQNTKLPCRVDADCGQCIIGPPPRNFCQANPRRDCRVDADCGKCFRNKCQ	98	none	0.39	extr 29	extr	Cluster04171	-	-	-	-	-	-	-	-	-	-	-	-	-	-	-
g4088.t1	Dreco_g4088	MQRIVQCGLVVAALVSGISAVEPVPNSQLAAYMDRLSKAMMTMDDDRPPFYDGANQFEPTCIQNVGQCFTTEFWTRHYLAQIENVTIIPSVHVDAELINLKDEVGTIKSTKSVAVARGTTKGWTISAKATVSTLFSGKGGFAEVSGTYKDETTDLTTQTRTVEYASTCAAGRTCRIQTVTFQAVLRGVCRGEPFIWCSSERRMCDSGLQDSCSQYGDYFKKSCSSGVPLTSDCETTVQIRDGKNDLLSVVVLE	0.718	21	0.721	21	0.818	12	0.723	0.722	Y	0.45	SignalP-noTM		extr 20, cyto 2, golg 2, plas 1, cyto_nucl 1, pero 1, E.R. 1, cyto_mito 1	EPVPNSQLAAYMDRLSKAMMTMDDDRPPFYDGANQFEPTCIQNVGQCFTTEFWTRHYLAQIENVTIIPSVHVDAELINLKDEVGTIKSTKSVAVARGTTKGWTISAKATVSTLFSGKGGFAEVSGTYKDETTDLTTQTRTVEYASTCAAGRTCRIQTVTFQAVLRGVCRGEPFIWCSSERRMCDSGLQDSCSQYGDYFKKSCSSGVPLTSDCETTVQIRDGKNDLLSVVVLE	232	none	0.11	extr 12, cyto 12, cyto_nucl 11.5, nucl 7	extr		-	-	-	-	SSF56973||6.67E-5;	-	-	-	-	-	-	-	-	-	-
g4104.t1	Dreco_g4104	MKWPAASLVALALAQACLLPGESQAPTERVVYGKANSKSTDLAVGAGDRFRGGQSTPVGLGMSDRDLQSILNVGEVDSGLHALARAFKAVTIFPAPHRTFEDRIVYGLVIGRPRVFLLGGIHGRERGVPDSLVYFLSDLLTARAWGAGLSYGGQNYTNVQVNAALSAGIVAVPLANPDGAAHDHATRSCWRKNRNARVSEGRGHPTATGVDLNRNFAVMWDYKRIFHEAADLRFAASDQAASEVFHGTAPLSEPESQNVDWVFERQGGLSWFLDLHSNKGDIFYAWGDDDYQVDDAGQNFANRTYDGKRGFLAQEGERVPYREYIDPRDLVAQQSVVSAMRTAMERAGSVRYMASPHSSRYVTSGTSAEHAFGRDKAGSCAAKRVHGLTMEFGRHSESP…	0.242	17	0.472	17	0.942	5	0.917	0.713	Y	0.45	SignalP-noTM		extr 19, mito 4, cyto 3	LLPGESQAPTERVVYGKANSKSTDLAVGAGDRFRGGQSTPVGLGMSDRDLQSILNVGEVDSGLHALARAFKAVTIFPAPHRTFEDRIVYGLVIGRPRVFLLGGIHGRERGVPDSLVYFLSDLLTARAWGAGLSYGGQNYTNVQVNAALSAGIVAVPLANPDGAAHDHATRSCWRKNRNARVSEGRGHPTATGVDLNRNFAVMWDYKRIFHEAADLRFAASDQAASEVFHGTAPLSEPESQNVDWVFERQGGLSWFLDLHSNKGDIFYAWGDDDYQVDDAGQNFANRTYDGKRGFLAQEGERVPYREYIDPRDLVAQQSVVSAMRTAMERAGSVRYMASPHSSRYVTSGTSAEHAFGRDKAGSCAAKRVHGLTMEFGRHSESPFCPFYPDKDAYHENLRQ…	418	none	0.07	cyto_nucl 16, cyto 15.5, nucl 11.5, extr 3	cyto_nucl	Cluster04154	P04069|CBPB_ASTAS|2e-15	-	PF00246|Zinc carboxypeptidase|5.8E-24;	PTHR11705:SF56||1.0E-36;PTHR11705||1.0E-36;PTHR11705||1.0E-36;PTHR11705:SF56||1.0E-36;	SSF53187||6.95E-42;SSF53187||6.95E-42;	-	-	-	PS51257|Prokaryotic membrane lipoprotein lipid attachment site profile.|5.0;	SM00631||9.0E-8;	-	G3DSA:3.40.630.10||8.8E-46;G3DSA:3.40.630.10||8.8E-46;	-	-	-
g4107.t1	Dreco_g4107	MRHFFLAAFVLLEATHAATATPSADLVAATPPTVATPKLDAPPRVVVEKYPDAGHELSLVPGTVFVNALDADNATAATGDLMAFDVADVDLSRVGALGYIGLLLYMTFIAWNPGSQSFWMGDELAKA	0.784	21	0.829	21	0.939	12	0.871	0.852	Y	0.45	SignalP-noTM		extr 14, mito 3, cyto 3, E.R. 3, cyto_mito 3	PSADLVAATPPTVATPKLDAPPRVVVEKYPDAGHELSLVPGTVFVNALDADNATAATGDLMAFDVADVDLSRVGALGYIGLLLYMTFIAWNPGSQSFWMGDELAKA	106	none	0	extr 10, pero 7, nucl 6, cyto 6, cyto_nucl 6	extr		-	-	-	-	-	-	-	-	-	-	-	-	-	-	-
g4114.t1	Dreco_g4114	MLTSTWAVSLFSFALCLAPLPAPVSAVPLDLAEPSAGLSCDGDAAQSSSLPSASKDLSPVAKADAGASETLAAPVERPSRLSVPRKDPPPLTRGDGTPQGRPEEPPAASPTASVAATPAKPARPSTGNQAVDDHCNRFDDDAGASKCRRAVFRCSGMVARDAKVADFLACVDRVQICITEEDPFKSLQSENDACIARATRCQQDPSMPLGDLKKLSDCKDKTV	0.843	27	0.854	27	0.97	7	0.877	0.866	Y	0.45	SignalP-noTM		extr 22, pero 2, mito 1, cyto 1, E.R. 1, cyto_mito 1	PLDLAEPSAGLSCDGDAAQSSSLPSASKDLSPVAKADAGASETLAAPVERPSRLSVPRKDPPPLTRGDGTPQGRPEEPPAASPTASVAATPAKPARPSTGNQAVDDHCNRFDDDAGASKCRRAVFRCSGMVARDAKVADFLACVDRVQICITEEDPFKSLQSENDACIARATRCQQDPSMPLGDLKKLSDCKDKTV	196	none	0.41	cyto_nucl 13, nucl 12.5, extr 10, cyto 8.5	cyto_nucl		-	-	-	-	-	-	-	-	-	-	-	-	-	-	-
g4119.t1	Dreco_g4119	MKQVFSRWVVLASLHGYLQGGLASGTDCDAVIVEYQPVVKICSGTTVTTTMIKTTTTQLSAESAKALYMDGRVHESGSDGAKYGYKSGHKKGGHGYESDSEESGYGHKSGSKSSGHGRKSGSKGSGHGEKSGSKGSGHGGKSGSKGAGHGGKSGSKGGGRGHVDPCFDWYTEPNFWGDFGFYNIRHYPLRIGVGDDDHD	0.456	24	0.57	24	0.883	19	0.707	0.644	Y	0.45	SignalP-noTM		extr 15, cyto 6, cyto_mito 5.833, mito 4.5, cyto_nucl 3.833	GTDCDAVIVEYQPVVKICSGTTVTTTMIKTTTTQLSAESAKALYMDGRVHESGSDGAKYGYKSGHKKGGHGYESDSEESGYGHKSGSKSSGHGRKSGSKGSGHGEKSGSKGSGHGGKSGSKGAGHGGKSGSKGGGRGHVDPCFDWYTEPNFWGDFGFYNIRHYPLRIGVGDDDHD	175	110 - GSKSSGHGRKSGSKGSGHGEKSGSKGSGHGGKSGSKGAGHGGKSGSKGGGR - 160	0.08	cyto 14.5, cyto_nucl 10, extr 9, nucl 4.5, extr_plas 4.5	cyto		-	-	-	-	-	-	-	-	-	-	-	-	-	-	-
g4124.t1	Dreco_g4124	MGDSEVTDGSRSVSCCVLLLLSLPPQVCIGSLRALEGAGDELLAMAVPGVICHPSSNPITSASFHLVPQSHDASSSIITRSPSETIPSETPVRDGRYSTPTRRTDG	0.405	31	0.44	31	0.782	28	0.5	0.473	Y	0.45	SignalP-noTM		extr 20, cyto 3, plas 2, cyto_pero 2	LRALEGAGDELLAMAVPGVICHPSSNPITSASFHLVPQSHDASSSIITRSPSETIPSETPVRDGRYSTPTRRTDG	75	none	0.14	extr 16, cyto_nucl 7.33333, cyto 7, nucl 4.5, cyto_pero 4.5	extr		-	-	-	-	-	-	-	-	-	-	-	-	-	-	-
g4125.t1	Dreco_g4125	MPSGSLVLRASALGALAAAGLVDGASLKDIKHVVLFMQENRAFDHYFGTMAGVRGFGDPNVQVNPDGRSVFEQPLYLPRNGVKVLKPWHINHLGGEWVNASQCMGAGDNGWAAMHSAYAGGLGNNWNYADGGYSMGYYKREDVPAHFDIAEGWTLLDMSTQSILAATDPNRIQWMSGTINVPGSPTNPEGKGSVIIDNSASPGCEAPGLNCFPFLWKTFPEYLEEAGISWQVWQDLDNFEDNMLAYFEQYQLAAKDSPLRTKGNSYPGLAAFYESAAKGTLPQVSWIVGPQELAEHPPNRPVDGAWFQKKVIDAITSSPAYNETVLIISYDEQGGWADHVVPQPAAMDTPGEWMEDPYNELGCVPVGPGWRIPRYIISPYTRGGNVFTERADHSSDILF…	0.28	25	0.424	25	0.858	6	0.657	0.55	Y	0.45	SignalP-noTM		extr 26	SLKDIKHVVLFMQENRAFDHYFGTMAGVRGFGDPNVQVNPDGRSVFEQPLYLPRNGVKVLKPWHINHLGGEWVNASQCMGAGDNGWAAMHSAYAGGLGNNWNYADGGYSMGYYKREDVPAHFDIAEGWTLLDMSTQSILAATDPNRIQWMSGTINVPGSPTNPEGKGSVIIDNSASPGCEAPGLNCFPFLWKTFPEYLEEAGISWQVWQDLDNFEDNMLAYFEQYQLAAKDSPLRTKGNSYPGLAAFYESAAKGTLPQVSWIVGPQELAEHPPNRPVDGAWFQKKVIDAITSSPAYNETVLIISYDEQGGWADHVVPQPAAMDTPGEWMEDPYNELGCVPVGPGWRIPRYIISPYTRGGNVFTERADHSSDILFLEAWAAAHGYEGVRSKELTQWRRDH…	628	none	0.05	cyto_nucl 12.5, nucl 12, cyto 11, mito 3, cysk 3	cyto_nucl	Cluster03077	Q9RGS8|PHLN_BURPS|3e-71	-	PF04185|Phosphoesterase family|1.9E-77;	PTHR31956||2.7E-62;PTHR31956:SF1||2.7E-62;PTHR31956:SF1||2.7E-62;PTHR31956||2.7E-62;	-	-	-	-	-	-	-	-	-	-	-
g4130.t1	Dreco_g4130	MAAFQHRLLHYLLWLAFGALASYASTESTEQHGSTVLVEHLPMHVVCCGSTWTQTTITRTVTKACETCPPQTQVPTQTRESTDASWSSGLTASSQTSASSSASETTTQPPLPYPSRTAEQVKGIYADFWPDMDDIWDANPGGQSLYLIWADWEPVNKAPPCAADEQEYDGHCFLVVPEVDKAIGAWSDRKLVTTAIVYGTPAWARGRRPCAAGIYCVPDDAADFGRFAGMLARRYNGHNGHGRIADFVLDREVGNSNYFDIGCGPAKACDKSEWIDLIASNYKAGYDAVYAEQSTARIMTSIDNKFGLELEDVPGGQLCGMTVLEGLAANAGGRAWRVSINAYNKPGFVEISYYDFPYVTMGTVGVLVGWLRQRFPNAPALRTVQFVEQGLPGRPAERQ…	0.705	25	0.801	25	0.981	15	0.909	0.859	Y	0.45	SignalP-noTM		extr 19, mito 6, cyto 1.5, cyto_nucl 1.5	TESTEQHGSTVLVEHLPMHVVCCGSTWTQTTITRTVTKACETCPPQTQVPTQTRESTDASWSSGLTASSQTSASSSASETTTQPPLPYPSRTAEQVKGIYADFWPDMDDIWDANPGGQSLYLIWADWEPVNKAPPCAADEQEYDGHCFLVVPEVDKAIGAWSDRKLVTTAIVYGTPAWARGRRPCAAGIYCVPDDAADFGRFAGMLARRYNGHNGHGRIADFVLDREVGNSNYFDIGCGPAKACDKSEWIDLIASNYKAGYDAVYAEQSTARIMTSIDNKFGLELEDVPGGQLCGMTVLEGLAANAGGRAWRVSINAYNKPGFVEISYYDFPYVTMGTVGVLVGWLRQRFPNAPALRTVQFVEQGLPGRPAERQLQSRSLCTAFKNVLGTPGIDNYIYY…	569	none	0.04	nucl 12.5, cyto_nucl 10.5, cyto 7.5, extr 7, mito 4	nucl	Cluster00814	-	-	-	-	SSF51445||1.92E-6;SSF51445||1.92E-6;	-	-	-	-	-	-	G3DSA:3.20.20.80||5.3E-5;	-	-	-
g4160.t1	Dreco_g4160	MLFKPLVASLFTLGLATALPGGDHGHNLPGHRDHDRHDDHGFRGPALGKHFCGNVAVWNARLRACVCIKDGLVFDSNTKSCYVDCGREAYFNRNSRQCVCKNNELEFNPRNKDCSCPRGKKWDREARRCRSWVDCGREAVFDPRSRQCECKDHREEFNPRTKTCDVDCGRDATFDRRSRRCECKDRREEFSWKTKQCRVDCGREATFDRNSRKCECNDRREEFHWKTKTCSRYGHRDHGHKRDLRCGREADFDRKLNKCVCKIRTMDFNPRNKDCACPRGETFSVRARQCVVDCGRDATFNPRSRQCECRNRREEFHARTKTCRPDCGREANWDGRSRRCECKARGKRFDVRSKRCH	0.613	19	0.73	19	0.922	3	0.863	0.802	Y	0.45	SignalP-noTM		extr 7, nucl 6, pero 4, mito_nucl 4, cyto 3, vacu 3	PGGDHGHNLPGHRDHDRHDDHGFRGPALGKHFCGNVAVWNARLRACVCIKDGLVFDSNTKSCYVDCGREAYFNRNSRQCVCKNNELEFNPRNKDCSCPRGKKWDREARRCRSWVDCGREAVFDPRSRQCECKDHREEFNPRTKTCDVDCGRDATFDRRSRRCECKDRREEFSWKTKQCRVDCGREATFDRNSRKCECNDRREEFHWKTKTCSRYGHRDHGHKRDLRCGREADFDRKLNKCVCKIRTMDFNPRNKDCACPRGETFSVRARQCVVDCGRDATFNPRSRQCECRNRREEFHARTKTCRPDCGREANWDGRSRRCECKARGKRFDVRSKRCH	338	none	0.48	extr 11, cyto_nucl 10, nucl 9.5, cyto 9.5	extr	Cluster00464	-	-	-	-	-	-	-	-	-	-	-	-	-	-	-
g4161.t1	Dreco_g4161	MKITTVATLLVATAMAIPSPHQNNFQEPDGRDKCHDGKGYCHPKHLGGKHLPHHHKGHGGDRRPLIDLEIGGHKGRHYGGRPSSPRRGGRHPLLDLEIGNFPHRGGRGYSPFRGGSRGYSPRRGNRGYSPRRGNSRSHSRGRDHSPRRGNRGYSPRPGGRGYSPRRGYSPRPGGHGPGPRPGGRDYSPRRGRDYSPRRGRDNSPRRGRDNSPRRGRDYSLRRGNNDHRPHRGYSPRRGDNDHRPHRGYSPRRGDNDHRPNRGYSPRRGDNDHRPNRGYSPRRGDNDHRPHRGYSPRRGDNDHRPHRGYSPRRGDNNHSPIRGPIRLPPLNGGKFIPHRGGNDYKPHRGDNDHPHRDGNRSPHRGDNDYKPPRHRDDSPHRGGDRSPHRGDNDYKPPHRG…	0.314	17	0.472	17	0.835	9	0.715	0.603	Y	0.45	SignalP-noTM		extr 20, nucl 2, cyto 2, cyto_nucl 2	PSPHQNNFQEPDGRDKCHDGKGYCHPKHLGGKHLPHHHKGHGGDRRPLIDLEIGGHKGRHYGGRPSSPRRGGRHPLLDLEIGNFPHRGGRGYSPFRGGSRGYSPRRGNRGYSPRRGNSRSHSRGRDHSPRRGNRGYSPRPGGRGYSPRRGYSPRPGGHGPGPRPGGRDYSPRRGRDYSPRRGRDNSPRRGRDNSPRRGRDYSLRRGNNDHRPHRGYSPRRGDNDHRPHRGYSPRRGDNDHRPNRGYSPRRGDNDHRPNRGYSPRRGDNDHRPHRGYSPRRGDNDHRPHRGYSPRRGDNNHSPIRGPIRLPPLNGGKFIPHRGGNDYKPHRGDNDHPHRDGNRSPHRGDNDYKPPRHRDDSPHRGGDRSPHRGDNDYKPPHRGDNSPHGGNHDGPNRGGN…	585	72 - GHKGRHYGGRPSSPRRGGRH - 91	0.48	nucl 23, cyto_nucl 16, cyto 7	nucl		A4II09|EIF3A_XENTR|5e-08	-	-	-	-	-	-	-	-	-	-	-	-	-	-
g4163.t1	Dreco_g4163	MARAALLAGLLTGIGAAQDAISSSTLGFHYMGCVAAAPSSFPLSPAGIPKRYTAAECFRACVAAGANYAALGNGCHCDNAAPGQAPPYESVAESECSQECIIGDWRAGRCGGPPASNPGSKQVFSLYMRTSLASISQRGLMTDEEDCDDDKKAKEKSKVVPVVIKAADVTKTITSCPPDVVNCPAAHKATCPPGGCRPAVTKTKTKTMTTTEPCTEMGTPPPVVTKIAVDVEKVKAECPGGCHDAKVAVVADCPGGCHDSKKAVVPTCPGAGCNSTKTDSGERHCAGGCKGTTVVPPPPATTAWKAPTDVVVVVSEGAFRRPARTAGLFGLSLMMALVVDLF	0.326	17	0.494	17	0.868	15	0.73	0.621	Y	0.45	SignalP-noTM		extr 20, cyto 4, mito 3	QDAISSSTLGFHYMGCVAAAPSSFPLSPAGIPKRYTAAECFRACVAAGANYAALGNGCHCDNAAPGQAPPYESVAESECSQECIIGDWRAGRCGGPPASNPGSKQVFSLYMRTSLASISQRGLMTDEEDCDDDKKAKEKSKVVPVVIKAADVTKTITSCPPDVVNCPAAHKATCPPGGCRPAVTKTKTKTMTTTEPCTEMGTPPPVVTKIAVDVEKVKAECPGGCHDAKVAVVADCPGGCHDSKKAVVPTCPGAGCNSTKTDSGERHCAGGCKGTTVVPPPPATTAWKAPTDVVVVVSEGAFRRPARTAGLFGLSLMMALVVDLF	325	none	0.07	extr 26, mito 3.5, E.R._mito 2.5	extr		-	-	PF01822|WSC domain|9.7E-7;	-	-	-	-	-	PS51212|WSC domain profile.|8.107;	-	-	-	-	-	-
g4171.t1	Dreco_g4171	MNAQRFAIVAFVHLFINLVRGVEQINRFGTVFVDYQPFEIICSGTTLQSQHARTYTTYADATTAFFTTVTGIGTGSTPSTITIPPTGDGATGTVIVLRPRRTGEFTGPYTTVTAAATNSRTVTVSLPPSGTDKTGTVLVLTPESTLTVTRTTTLISSGPVPGTSTVSPPPGCTTGCTVSIIITITGAHLTETVYGPTPGTSSIRPPPGCVGFCPTKVVVTQTGGYVTESIFGPTPTTMTVLPSPGCTGHCPTRIIVVQTGGFVTESTWGPVAGTSTQPPPPGCRGYCPTKIIVTRTGGLVTESTFGPVPGTSTILPSPGCTGYCPTRVIVTQTAGLVTESVFGPVPGTSTVLPSAGCTGYCPTKVIVTRMAGYRTATVFGPTPGTRTIPPSAGCVGDCP…	0.785	22	0.762	22	0.869	21	0.736	0.748	Y	0.45	SignalP-noTM		extr 25	EQINRFGTVFVDYQPFEIICSGTTLQSQHARTYTTYADATTAFFTTVTGIGTGSTPSTITIPPTGDGATGTVIVLRPRRTGEFTGPYTTVTAAATNSRTVTVSLPPSGTDKTGTVLVLTPESTLTVTRTTTLISSGPVPGTSTVSPPPGCTTGCTVSIIITITGAHLTETVYGPTPGTSSIRPPPGCVGFCPTKVVVTQTGGYVTESIFGPTPTTMTVLPSPGCTGHCPTRIIVVQTGGFVTESTWGPVAGTSTQPPPPGCRGYCPTKIIVTRTGGLVTESTFGPVPGTSTILPSPGCTGYCPTRVIVTQTAGLVTESVFGPVPGTSTVLPSAGCTGYCPTKVIVTRMAGYRTATVFGPTPGTRTIPPSAGCVGDCPTQIIVTRTAGYRTETVFGPTPG…	475	none	0.11	cyto 12.5, cyto_nucl 12, nucl 8.5, cysk 7	cyto	Cluster07590	-	-	-	-	-	-	-	-	-	-	-	-	-	-	-
g4187.t1	Dreco_g4187	MLARSLGLLLLLAFVQCALCAEDYYKVFSFSFCDAGRSSSDAEPWQILGVDKSATDKQLKSAYRQLSKKFHPDKNPYATQPPIPSPPFPLPLASRLSSHAVSVRRKDSSAHDKFVEVSEAYDVLSDASLRSVYDQHGHEGVKQHRQGNTGGGHDPFDLFSRFFGGHGHFGKTSTEPRGHNVDVRVEISLRDFYNGATTNFQWDRQHICEACEGSGSADGEVEKCSGCNGHGIRIMKQQLAPGMFQQMQVRCEFCGGRGKSIRNKCTRCHGARVERKPTTVTLKVQPGTAREARVVFENEADESPDWVAGDLIVTIAEKGPSAGENPDGVDGIFFRRKGDDLYWTEVLSLREAWMGDWSRNLTHLDAHPVRLGRSRGQIVHPGHVETVVGQGMPRWHEDG…	0.851	21	0.901	21	0.982	4	0.952	0.929	Y	0.45	SignalP-noTM		extr 19, E.R. 3, golg 3	EDYYKVFSFSFCDAGRSSSDAEPWQILGVDKSATDKQLKSAYRQLSKKFHPDKNPYATQPPIPSPPFPLPLASRLSSHAVSVRRKDSSAHDKFVEVSEAYDVLSDASLRSVYDQHGHEGVKQHRQGNTGGGHDPFDLFSRFFGGHGHFGKTSTEPRGHNVDVRVEISLRDFYNGATTNFQWDRQHICEACEGSGSADGEVEKCSGCNGHGIRIMKQQLAPGMFQQMQVRCEFCGGRGKSIRNKCTRCHGARVERKPTTVTLKVQPGTAREARVVFENEADESPDWVAGDLIVTIAEKGPSAGENPDGVDGIFFRRKGDDLYWTEVLSLREAWMGDWSRNLTHLDAHPVRLGRSRGQIVHPGHVETVVGQGMPRWHEDGDSVYHKTEFGNLYVTYEVVLP…	441	none	0.12	cyto_nucl 15.5, cyto 14.5, nucl 13.5	cyto_nucl	Cluster01897	P25303|SCJ1_YEAST|8e-74	-	PF00226|DnaJ domain|6.6E-19;PF00684|DnaJ central domain|3.0E-13;PF01556|DnaJ C terminal domain|7.2E-20;	PTHR24078:SF207||7.3E-129;PTHR24078||7.3E-129;PTHR24078||7.3E-129;PTHR24078:SF207||7.3E-129;	SSF49493||1.57E-10;SSF57938||2.49E-16;SSF46565||2.62E-25;SSF46565||2.62E-25;SSF49493||3.79E-11;SSF49493||3.79E-11;	-	-	PS00636|Nt-dnaJ domain signature.|-;	PS50076|dnaJ domain profile.|18.988;PS51188|Zinc finger CR-type profile.|21.991;	SM00271|DnaJ molecular chaperone homology domain|1.0E-18;	-	G3DSA:1.10.287.110||4.0E-26;G3DSA:2.10.230.10||1.7E-16;G3DSA:2.60.260.20||3.1E-14;G3DSA:2.60.260.20||2.5E-15;G3DSA:2.60.260.20||2.5E-15;	-	-	PR00625|DnaJ domain signature|8.6E-22;PR00625|DnaJ domain signature|8.6E-22;PR00625|DnaJ domain signature|8.6E-22;PR00625|DnaJ domain signature|8.6E-22;
g4189.t1	Dreco_g4189	MKVIAALVSLAAMATAAPASPIINVSVAGGTSGAPGIFGQGSNLVSNIFDSAACLVSNVIGGGNPNCRGQGVGTTGDGIDPSTSVAFSYSYSTNQDGTLKVKVSLKNGKSCTYDLKADGKLLKDVIADAGHKCAVSK	0.494	20	0.63	20	0.907	10	0.788	0.715	Y	0.45	SignalP-noTM		extr 27	PIINVSVAGGTSGAPGIFGQGSNLVSNIFDSAACLVSNVIGGGNPNCRGQGVGTTGDGIDPSTSVAFSYSYSTNQDGTLKVKVSLKNGKSCTYDLKADGKLLKDVIADAGHKCAVSK	117	none	0.02	nucl 10, cyto 10, cyto_nucl 10, extr 8	nucl		-	-	-	-	-	-	-	-	-	-	-	-	-	-	-
g4195.t1	Dreco_g4195	MFFATRAAVAASAAVAVSALCTPLRPELGISVTPHEQYSSSIGALGCKLDTNRVAYWPEPVDCDNICVKVTHGDRSLHLLKVDQSTGAHDISYDAWNTLVFGEGAESKPHTGGGVAMTYRTVPADECKHLFAGGKLSLSAANSMNYVALCQSQPDSWVAKNLALVNILDPQCKYGHDEVCTLDMQTSNQAKCPHQLGAADPLNSSVVNLQYGTGKQVPS	0.295	20	0.466	20	0.907	2	0.709	0.597	Y	0.45	SignalP-noTM		extr 26	CTPLRPELGISVTPHEQYSSSIGALGCKLDTNRVAYWPEPVDCDNICVKVTHGDRSLHLLKVDQSTGAHDISYDAWNTLVFGEGAESKPHTGGGVAMTYRTVPADECKHLFAGGKLSLSAANSMNYVALCQSQPDSWVAKNLALVNILDPQCKYGHDEVCTLDMQTSNQAKCPHQLGAADPLNSSVVNLQYGTGKQVPS	199	none	0.01	extr 19, nucl 7, cyto_nucl 6.5, cyto 4	extr	Cluster00134	-	-	-	PTHR38850:SF2||4.9E-86;PTHR38850||4.9E-86;	-	-	-	-	-	-	-	-	-	-	-
g4198.t1	Dreco_g4198	MAGCSLPSRALAPLLLLLLLLLHSSPSTGKRLDTDARTPIKARNEAPALRSDPDSSKSNAGINSNSNSDSNSNAGTDVNMNGNMLIPPYTPIVTPSPDQSAILAAYSFRQETYYECRTRDGAEHCGWHIPLVKAEAGGPGLGTVASTGAVVAAVLCLAAVFAVAMM	0.806	30	0.865	30	0.98	18	0.929	0.9	Y	0.45	SignalP-noTM		extr 21, plas 4	RLDTDARTPIKARNEAPALRSDPDSSKSNAGINSNSNSDSNSNAGTDVNMNGNMLIPPYTPIVTPSPDQSAILAAYSFRQETYYECRTRDGAEHCGWHIPLVKAEAGGPGLGTVASTGAVVAAVLCLAAVFAVAMM	136	none	0.06	plas 23, nucl 4, cyto 2, mito 2, cyto_mito 2	plas		-	-	-	-	-	-	-	-	-	-	-	-	-	-	-
g4212.t1	Dreco_g4212	MSGAKFILGTWLAAGFGLQAHAGRPDHQIECPVHPVEILDCPEPPVHVIICHQPAVLSTVVEKETTLYIGGKTIVVDKCPTTIITEVTLTETSTKYFTKTMIGGNTTEFETTTTSITGRSTGTQGGSITGRTRSSTTGVSSTGTQGGTITRRTSSSTGTQGGTITERTTTRSSGTAGSSTGTGGGTITQRTTTRASSSAGSSTGTGGGTITQRTTTGASSSVGSSTGTGGAINNQCVELCRILHGNRGRHHYATNHHRCVKLHCVIHRHGRRHHHSANDSNVRRYNRFLRCHVGHDQRGFFDRSFHQRGLDDGSIHQCRSLYEPCHDVCSLDERRIQQRGLDFRVHHGRVHQCRSIYLGCHDKWCIDERCLYFGRIDKRCFNERRFDECCLDQRRFDKR…	0.301	23	0.459	23	0.803	12	0.701	0.59	Y	0.45	SignalP-noTM		extr 12, plas 7, nucl 3, vacu 2, cyto 1, pero 1, E.R. 1, cyto_pero 1	RPDHQIECPVHPVEILDCPEPPVHVIICHQPAVLSTVVEKETTLYIGGKTIVVDKCPTTIITEVTLTETSTKYFTKTMIGGNTTEFETTTTSITGRSTGTQGGSITGRTRSSTTGVSSTGTQGGTITRRTSSSTGTQGGTITERTTTRSSGTAGSSTGTGGGTITQRTTTRASSSAGSSTGTGGGTITQRTTTGASSSVGSSTGTGGAINNQCVELCRILHGNRGRHHYATNHHRCVKLHCVIHRHGRRHHHSANDSNVRRYNRFLRCHVGHDQRGFFDRSFHQRGLDDGSIHQCRSLYEPCHDVCSLDERRIQQRGLDFRVHHGRVHQCRSIYLGCHDKWCIDERCLYFGRIDKRCFNERRFDECCLDQRRFDKRRVYVCCVDDGRFNKCWSVNYGGI…	1284	none	0.54	nucl 23, plas 5, pero 2	nucl		-	-	-	-	-	-	-	-	-	-	-	-	-	-	-
g4214.t1	Dreco_g4214	MRLSGFLTILGLTAVVAGWPTGRDILWRRQTPGAQNVVYWGQNGGNTVANNDLSYYCRSTSGIDVLVLAFIYQYGGSSNIPYGGFGQSCYVTSNGQGQNCAGLAAAIATCQAAGIKIILSIGGATSTYSLRSRAQAEAIGQYLWDSYGNSGNKVVQRPFGKVFVNGFDLDIESNGGSSQWYRYMVAKLRSNFAKDPKNRYYITGAPQCPIPEPNMGVIISNSQFDYLFVQFYNNNPNCALGVNGGAPMNYKSWASFLSNTPSKNAKIFIGVPAAPTAANGVSSGSIYYATPSQLASIVKTYRTDARFGGIMMWSAGFSDSNVSNGCTYAQHAKRILVSGAPCAPAPAKTTTAKTTAKTTPKTTTIAKKATTTTVKKTTTVPAKKATTTTAKKVTTAAAK…	0.616	19	0.745	19	0.939	2	0.899	0.828	Y	0.45	SignalP-noTM		extr 24, cyto 2	PTGRDILWRRQTPGAQNVVYWGQNGGNTVANNDLSYYCRSTSGIDVLVLAFIYQYGGSSNIPYGGFGQSCYVTSNGQGQNCAGLAAAIATCQAAGIKIILSIGGATSTYSLRSRAQAEAIGQYLWDSYGNSGNKVVQRPFGKVFVNGFDLDIESNGGSSQWYRYMVAKLRSNFAKDPKNRYYITGAPQCPIPEPNMGVIISNSQFDYLFVQFYNNNPNCALGVNGGAPMNYKSWASFLSNTPSKNAKIFIGVPAAPTAANGVSSGSIYYATPSQLASIVKTYRTDARFGGIMMWSAGFSDSNVSNGCTYAQHAKRILVSGAPCAPAPAKTTTAKTTAKTTPKTTTIAKKATTTTVKKTTTVPAKKATTTTAKKVTTAAAKKVTTTAAKKTTTAAAKKVA…	441	none	0.18	cyto 17.5, cyto_nucl 16, nucl 9.5, mito 3	cyto	Cluster00774	E9F9R9|CHI2_METRA|1e-163	2388|PHI:2388|Chi2|0|5530|Metarhiziumanisopliae|Mixedoutcome|2e-161	-	PTHR11177||4.0E-45;PTHR11177:SF157||4.0E-45;	SSF51445||1.52E-69;	-	-	PS01095|Chitinases family 18 active site.|-;	-	-	-	G3DSA:3.20.20.80||2.3E-89;	-	-	-
g4222.t1	Dreco_g4222	MPAAQLVLFLPIPLLPLHLHPHPSISPPPPHPKTRIAGSLSFRSSSKRRSCHTLLRKAPELAVDPSPATYLLLLLILPPSAADAPRAEQRRSRHSSLDTDAHGRISGTPYAASPRLGHASPRLVFVPRGRNVGTQAEPACIFRPPSVGLPRSTHDIRSVPRAPLPPRVAAFSLRFLEPHRMRLGCSSLSVPVATVTLIVVALHP	0.127	20	0.299	20	0.858	16	0.692	0.511	Y	0.45	SignalP-noTM		extr 14, mito 8, plas 3	PHPSISPPPPHPKTRIAGSLSFRSSSKRRSCHTLLRKAPELAVDPSPATYLLLLLILPPSAADAPRAEQRRSRHSSLDTDAHGRISGTPYAASPRLGHASPRLVFVPRGRNVGTQAEPACIFRPPSVGLPRSTHDIRSVPRAPLPPRVAAFSLRFLEPHRMRLGCSSLSVPVATVTLIVVALHP	184	none	0.73	mito 14, nucl 6, plas 5, E.R. 4	mito		-	-	-	-	-	-	-	-	-	-	-	-	-	-	-
g4238.t1	Dreco_g4238	MKITSAIISALISGALAVPQAVVDSDSDLRDLEGTAASATEVGNVDSVGFLDKRYVVVSNGGAQVGALEARGGAKTQGATNGAAKQRGKKATQARSQGATKAQGKARTQGKARTQGKARTQGKARTQGKARTQGKARTQGQTKAQGKTQGKTQGKTQGRGNANKATNNKAGQTKEEQPRVTSSFDAPGVV	0.636	18	0.719	18	0.867	3	0.816	0.771	Y	0.45	SignalP-noTM		extr 25	PQAVVDSDSDLRDLEGTAASATEVGNVDSVGFLDKRYVVVSNGGAQVGALEARGGAKTQGATNGAAKQRGKKATQARSQGATKAQGKARTQGKARTQGKARTQGKARTQGKARTQGKARTQGQTKAQGKTQGKTQGKTQGRGNANKATNNKAGQTKEEQPRVTSSFDAPGVV	172	84 - AKQRGKKATQARSQGATKAQGKARTQGKARTQGKARTQGKARTQGKARTQGKART - 138	0.21	cyto 20.5, cyto_nucl 13, extr 7, nucl 4.5	cyto		-	-	-	-	-	-	-	-	-	-	-	-	-	-	-
g4244.t1	Dreco_g4244	MKFLANLLLLGTLAAPIMAAAVPEEAKAVEGDVSAADMPEVNQWGRCRPRDCAWNGPRECNHRRDLGCEWRWGPGSGQYVCRCRRR	0.719	20	0.82	20	0.979	12	0.933	0.881	Y	0.45	SignalP-noTM		extr 16, mito 4, plas 4, E.R. 3	AVPEEAKAVEGDVSAADMPEVNQWGRCRPRDCAWNGPRECNHRRDLGCEWRWGPGSGQYVCRCRRR	66	none	0.18	extr 31	extr		-	-	-	-	-	-	-	-	-	-	-	-	-	-	-
g4260.t1	Dreco_g4260	MLGSTALGFVAFGLAPFALAQEPPAVGLGIGLGMPPPTPTPTPSPRLDDVLVRRNLDSVCVSSVLAGLAMPLTSVNPNLLRWARASAAAAATAARTGAVAAPTSSCTMTAPASLSTAFTEYLSILDHYLHTIDAKAAAVSTDCGAPGQLSLSFTGICTTSITLLFVDANNMVTTTSVPPLHSPPNRIPIGPQGAATITSLPSSSHPPSASNSAAAAPAIPNLLLPVAALAAVLGPVLAL	0.817	21	0.79	21	0.846	1	0.756	0.772	Y	0.45	SignalP-noTM		extr 10, plas 8, mito 4, vacu 4	EPPAVGLGIGLGMPPPTPTPTPSPRLDDVLVRRNLDSVCVSSVLAGLAMPLTSVNPNLLRWARASAAAAATAARTGAVAAPTSSCTMTAPASLSTAFTEYLSILDHYLHTIDAKAAAVSTDCGAPGQLSLSFTGICTTSITLLFVDANNMVTTTSVPPLHSPPNRIPIGPQGAATITSLPSSSHPPSASNSAAAAPAIPNLLLPVAALAAVLGPVLAL	218	none	0.1	plas 32	plas		-	-	-	-	-	-	-	-	-	-	-	-	-	-	-
g4262.t1	Dreco_g4262	MGKSLRARVLATLASTLVVRAAQIPQPRQGPPDIYWCNALNTNDVEQTCYCSKFWEVGWDGIDPTYKYIFDIEFKTDDHLASLNALFDGMERAVREGKDAYSTNVQALYQGSQSTHNLTMQLSPIDWRDWSTLNKVGAIRAFRRGSYEKRRLVGNIKWLVRTDTQFWNWTPEHCWRDTQCGSFNNCNFAEGGYMSVLVGWGWYS	0.601	22	0.698	22	0.933	21	0.812	0.76	Y	0.45	SignalP-noTM		extr 19, mito 6	QIPQPRQGPPDIYWCNALNTNDVEQTCYCSKFWEVGWDGIDPTYKYIFDIEFKTDDHLASLNALFDGMERAVREGKDAYSTNVQALYQGSQSTHNLTMQLSPIDWRDWSTLNKVGAIRAFRRGSYEKRRLVGNIKWLVRTDTQFWNWTPEHCWRDTQCGSFNNCNFAEGGYMSVLVGWGWYS	182	none	0.15	extr 18, cyto 7.5, cyto_nucl 6, nucl 3.5	extr	Cluster03251	-	-	-	-	-	-	-	-	-	-	-	-	-	-	-
g4273.t1	Dreco_g4273	MQFFAIAALVATAAALPALEVRGSDACPTDGLYTNPLCCSTDVLDVASLDCKVPSESFSGPRSFRRVCAKQGQKAQCCAVPVAGQALLCMDVIGA	0.461	27	0.57	16	0.955	11	0.912	0.754	Y	0.45	SignalP-noTM		extr 25	PTDGLYTNPLCCSTDVLDVASLDCKVPSESFSGPRSFRRVCAKQGQKAQCCAVPVAGQALLCMDVIGA	68	none	0	extr 17, nucl 10.5, cyto_nucl 8, cyto 4.5	extr		P52754|HYP1_HYPJE|1e-18	291|PHI:291|CPPH1|CAD10781|5111|Clavicepspurpurea|Unaffectedpathogenicity|2e-17	PF06766|Fungal hydrophobin|1.3E-24;	PTHR42341||2.0E-23;	SSF101751||6.28E-23;	-	-	-	-	-	-	G3DSA:3.20.120.10||7.6E-27;	-	-	-
g4301.t1	Dreco_g4301	MFEVLTTLLLAGSAMASPSKLMASISADGEAKADGCGGMGDLTVNNFYFHGVTGRDSILSEVYWHTSEIYFTLHSTAVDFERSAGPRPR	0.637	17	0.679	17	0.805	8	0.719	0.7	Y	0.45	SignalP-noTM		extr 13, mito 8, cyto 5	PSKLMASISADGEAKADGCGGMGDLTVNNFYFHGVTGRDSILSEVYWHTSEIYFTLHSTAVDFERSAGPRPR	72	none	0.02	cyto_nucl 16.5, nucl 14, cyto 13, extr 5	cyto_nucl		-	-	-	-	-	-	-	-	-	-	-	-	-	-	-
g4310.t1	Dreco_g4310	MALTKLSLALLALAGSVMADLQPIEMKGSKFFYKNGTQFFMKGVAYQQDSSAAGATNNNENATYVDPLADTNACKRDVPLLKELGTNTIRTYAIDPTLNHDGCMKLLQDAGIYVISDLGEPGLSINRDNPEWNTELFNRYQRVVDNLAKYSNVIGFFAGNEVSNNRSNTDASAYVKAAVRDTKAYIKFRNYRWMGVGYAANDDVDIRQEIADYFNCGPTTDSIDFWGYNIYSWCGESDMEKSGYTKQTEFFQNYSVPVFFAEYGCNLPDGAENRIFQETEALYSDAMTPVFSGGIVYMYFQETNDYGVVKVGSDGKATKQKDFSALKTQVNKADPKAVDRDSYTSSNKPANCPTLSDTWKASGKKLPPTPDVALCDCMSKSRSCVKSKNLGEKSFGAIF…	0.76	20	0.838	20	0.965	3	0.921	0.883	Y	0.45	SignalP-noTM		extr 24, mito 1, E.R. 1, golg 1	LQPIEMKGSKFFYKNGTQFFMKGVAYQQDSSAAGATNNNENATYVDPLADTNACKRDVPLLKELGTNTIRTYAIDPTLNHDGCMKLLQDAGIYVISDLGEPGLSINRDNPEWNTELFNRYQRVVDNLAKYSNVIGFFAGNEVSNNRSNTDASAYVKAAVRDTKAYIKFRNYRWMGVGYAANDDVDIRQEIADYFNCGPTTDSIDFWGYNIYSWCGESDMEKSGYTKQTEFFQNYSVPVFFAEYGCNLPDGAENRIFQETEALYSDAMTPVFSGGIVYMYFQETNDYGVVKVGSDGKATKQKDFSALKTQVNKADPKAVDRDSYTSSNKPANCPTLSDTWKASGKKLPPTPDVALCDCMSKSRSCVKSKNLGEKSFGAIFGFICGADPEICTAIKGNAST…	511	none	0.04	cyto 10, mito_pero 6.5, pero 6, cyto_golg 6, mito 5, plas 4.5	cyto	Cluster00140	D4ATC3|GAS1_ARTBC|1e-178	2808|PHI:2808|gas1|Q2KN79|59765|Fusariumoxysporumf.sp.Lycopersici|Reducedvirulence|0.0	PF03198|Glucanosyltransferase|2.9E-127;PF07983|X8 domain|2.0E-22;	PTHR31468||2.7E-229;PTHR31468:SF2||2.7E-229;	SSF51445||4.23E-57;	-	-	-	-	SM00768|Possibly involved in carbohydrate binding|5.5E-21;	-	G3DSA:3.20.20.80||2.8E-39;	-	-	-
g4326.t1	Dreco_g4326	MAFTYHILLALSLCLATSLALPCTSFTVNGSNPTVFSFYRFYDFRKASASTTLQQGQATIYQPGSGSLPPTQQVSGSSNLSDWMVQYSHREPSLAGRPSLDYLPANVVIDNDTQQGGQLFFGLADVTSVSFRVSAYISGDPGAVAGIFTYRNDTQESDIEVLTRESGHNVHFTNQPSQDDNGQDVPGASQNITLPAGGTVINWMNYRLDWFKDSQESVWYVNGLKLANTTINVPEAASTLILNMWSNGGYWSGNMAVGDLATLKIRWIEVAFNSPSQPSGQPGRTCAIDP	0.77	21	0.863	21	0.989	14	0.971	0.921	Y	0.45	SignalP-noTM		extr 27	PCTSFTVNGSNPTVFSFYRFYDFRKASASTTLQQGQATIYQPGSGSLPPTQQVSGSSNLSDWMVQYSHREPSLAGRPSLDYLPANVVIDNDTQQGGQLFFGLADVTSVSFRVSAYISGDPGAVAGIFTYRNDTQESDIEVLTRESGHNVHFTNQPSQDDNGQDVPGASQNITLPAGGTVINWMNYRLDWFKDSQESVWYVNGLKLANTTINVPEAASTLILNMWSNGGYWSGNMAVGDLATLKIRWIEVAFNSPSQPSGQPGRTCAIDP	269	none	0.21	nucl 14.5, cyto_nucl 12, mito 7, cyto 6.5	nucl	Cluster02633	-	-	-	PTHR38121||1.8E-32;PTHR38121:SF1||1.8E-32;	SSF49899||1.46E-23;	-	-	-	-	-	-	G3DSA:2.60.120.200||2.7E-25;	-	-	-
g4331.t1	Dreco_g4331	MLLFTALCLLQGIVLALPSAATGQGFACRSELPSEDSLRKLAKSQHRAFCVVKPHPHGGDDAPAIVDALSIKCRSNALVYLPGPVYNIKTVMTTAKLDDVAIHQPGRLLWSTDIAYWRSVSMPVDFQNQTTVWYFGGNRVTWDGYGVGTLDGNGQIWYDWAKSRGNLPRRPMNINFRGLTNSVIRRLRFVQSQMWTMAITYSKRVDLDDIYVSSVSNSKWNTLNTDGCDTIYSDDITFRRWYVNNGDDAIALKPNSSNIKVLDSVFENGQGVAIGSMGQYDGRYDYITNFYARNITLRNTAHVSYLKTWAGLSRGYPPNGGGGGLGRASNIVMEDVRAERLRRQPFFAWQCENYSGFAGKDCHSSKFKMDELVWRNVRGTVDDAVNEVGWFQCSAAAGG…	0.758	17	0.857	17	0.98	10	0.967	0.916	Y	0.45	SignalP-noTM		extr 27	PSAATGQGFACRSELPSEDSLRKLAKSQHRAFCVVKPHPHGGDDAPAIVDALSIKCRSNALVYLPGPVYNIKTVMTTAKLDDVAIHQPGRLLWSTDIAYWRSVSMPVDFQNQTTVWYFGGNRVTWDGYGVGTLDGNGQIWYDWAKSRGNLPRRPMNINFRGLTNSVIRRLRFVQSQMWTMAITYSKRVDLDDIYVSSVSNSKWNTLNTDGCDTIYSDDITFRRWYVNNGDDAIALKPNSSNIKVLDSVFENGQGVAIGSMGQYDGRYDYITNFYARNITLRNTAHVSYLKTWAGLSRGYPPNGGGGGLGRASNIVMEDVRAERLRRQPFFAWQCENYSGFAGKDCHSSKFKMDELVWRNVRGTVDDAVNEVGWFQCSAAAGGCNGITVAKINFRKVNGT…	417	none	0.05	cyto 13.5, cyto_nucl 13.5, nucl 8.5, E.R. 3, mito 2, pero 2, mito_pero 2, E.R._golg 2	cyto	Cluster01809	A2QG68|RGXB_ASPNC|3e-97	115|PHI:115|PGX1|AAC26146|5017|Cochlioboluscarbonum|Unaffectedpathogenicity|1e-42	PF00295|Glycosyl hydrolases family 28|1.1E-32;	PTHR31736||2.1E-125;PTHR31736:SF8||2.1E-125;	SSF51126||9.6E-66;	-	-	-	-	-	-	G3DSA:2.160.20.10||4.6E-68;	-	-	-
g4348.t1	Dreco_g4348	MAVAILTLLAAAAAVLSPSARAATLPPQEAQQQHHAGTALEVRDAPSSLSLVGVGPSSLAIRAVDRAPSGYTPSSVDCPEQRPSIRNGSELSPMELAWLPKRRNETIPHIRALLRRLAIPGFDSDKYLEQVERNATALPNIGLAVSGGGYRAMLNGAGALASWDSRSDGSQTKGNLGGLLQCATYLSGLSGGGWLVGSIYTNNFTSVQDAVNSPNIWQFGSSILKGPEQYSLLQYYRNILDDIEAKEKAGYDRSITDYWGRMLSYQLINATNGGPAFTFSSIADDADFASGKTPLPFLVADGRAPGETLIALNSTVFEFSPWELGSFDPSLNGFVPLRYVGSKFANGSLPASEKCVSGFDNAGFVMGTSSSLFNQIVLYLRDPSSNYVPADTPKFVVDA…	0.623	23	0.736	23	0.979	10	0.87	0.808	Y	0.45	SignalP-noTM		extr 23, plas 3	TLPPQEAQQQHHAGTALEVRDAPSSLSLVGVGPSSLAIRAVDRAPSGYTPSSVDCPEQRPSIRNGSELSPMELAWLPKRRNETIPHIRALLRRLAIPGFDSDKYLEQVERNATALPNIGLAVSGGGYRAMLNGAGALASWDSRSDGSQTKGNLGGLLQCATYLSGLSGGGWLVGSIYTNNFTSVQDAVNSPNIWQFGSSILKGPEQYSLLQYYRNILDDIEAKEKAGYDRSITDYWGRMLSYQLINATNGGPAFTFSSIADDADFASGKTPLPFLVADGRAPGETLIALNSTVFEFSPWELGSFDPSLNGFVPLRYVGSKFANGSLPASEKCVSGFDNAGFVMGTSSSLFNQIVLYLRDPSSNYVPADTPKFVVDALTSLLQTLGEANNDIADWTPNPF…	649	none	0.33	cyto 9, nucl 7, plas 5.5, mito 4.5, cyto_golg 4.5, extr_plas 3.5, mito_pero 3.5	cyto	Cluster01813	D4ANV2|PLB1_ARTBC|0	105|PHI:105|PLB1|AAC61890|5476|Candidaalbicans|Reducedvirulence|5e-128	PF01735|Lysophospholipase catalytic domain|8.7E-179;	PTHR10728||9.3E-196;PTHR10728:SF33||9.3E-196;	SSF52151||1.57E-135;	-	-	-	PS51210|PLA2c domain profile.|118.265;	SM00022|Cytoplasmic phospholipase A2, catalytic subunit|2.0E-212;	-	G3DSA:3.40.1090.10||2.4E-135;	-	-	-
g4352.t1	Dreco_g4352	MKFTAVATVAMAALVSAADIPDCAKPCILDAAKAPTTNCEGNYACICKNIEAVRPLATGCVIKACSDKIAQVLKGIEDVCKEALSAPPAASGPASSAAATGVASTSVAASVPASSPASKPSTPQASATATHAATAVSSVDCSTTLAPSVTPHKNTTVPTTSAIVTAGAAGLASVGGLAMLALGALAL	0.621	18	0.711	18	0.875	4	0.817	0.768	Y	0.45	SignalP-noTM		extr 24, mito 2	DIPDCAKPCILDAAKAPTTNCEGNYACICKNIEAVRPLATGCVIKACSDKIAQVLKGIEDVCKEALSAPPAASGPASSAAATGVASTSVAASVPASSPASKPSTPQASATATHAATAVSSVDCSTTLAPSVTPHKNTTVPTTSAIVTAGAAGLASVGGLAMLALGALAL	169	none	0.04	plas 20, mito 5.5, cyto_mito 5, cyto 3.5	plas		-	-	PF05730|CFEM domain|6.9E-7;	PTHR35607||1.5E-13;	-	-	-	-	-	SM00747||0.0066;	-	-	-	-	-
g4389.t1	Dreco_g4389	MKLHAIAFTALLAASNVYAASDPPTKVIRSERSTRIAARQAKGVQHPSEVPLPGSFKSQGCFSSQGNLTMHKAPDKMSTGSCNNVCKADNFWVAGMKGSQCFCGFAYPPTNALVDDKKCNYPCPFYDLEACGGLGTPGAWSIFNTGINVDVSNFDESSSTTSSSAKPTSSSGDEATKAPAATETQAPADSSGDDKKSGPNTAGIAAGVVAGVVGAAALIGGIFFFLRRRRNSEIEEGHRRNAAVNAFINGSKPPGSSGSISMTDARLDPVLAHRRMSDGSIADNEDYSRRILRVTNA	0.694	20	0.757	20	0.876	1	0.816	0.789	Y	0.45	SignalP-noTM		extr 26	SDPPTKVIRSERSTRIAARQAKGVQHPSEVPLPGSFKSQGCFSSQGNLTMHKAPDKMSTGSCNNVCKADNFWVAGMKGSQCFCGFAYPPTNALVDDKKCNYPCPFYDLEACGGLGTPGAWSIFNTGINVDVSNFDESSSTTSSSAKPTSSSGDEATKAPAATETQAPADSSGDDKKSGPNTAGIAAGVVAGVVGAAALIGGIFFFLRRRRNSEIEEGHRRNAAVNAFINGSKPPGSSGSISMTDARLDPVLAHRRMSDGSIADNEDYSRRILRVTNA	277	none	0.34	plas 19, extr_plas 12.5, extr 4, nucl 4, cyto 2	plas	Cluster02599	-	-	PF01822|WSC domain|1.1E-12;	PTHR19297||1.6E-18;	-	TIGR01167|LPXTG_anchor: LPXTG cell wall anchor domain|0.0025;	-	-	PS51212|WSC domain profile.|9.898;	SM00321|present in yeast cell wall integrity and stress response component proteins|9.0E-7;	-	G3DSA:
g4393.t1	Dreco_g4393	MICPHWLAILWLGIIGATSAWAAENATVSPAKLVAGAFILECESGQICESVAKAVEKRGGTLRRTFNSDVFHGISVQLSNLTAEEDKKALVAQFKGIKGTWPVQGLAQSSDSTAKSQPEDKLEEKSTPGQGRGELLEKRLAATPKTYKRHKCLRGRAEDDHVESPWNHLMTHVDKLHKEGYMGSGIKIAVVDTGVDYNHPALGGCFGPACKVATGDNFSNEGDKGDPLDCHGHGTIVASILAGHDKAKGFVGVAPNATIMAYRVLNCRATGSEDDMIAGWLKAKEDGAQIIISSSGFEGQNWAQRPLAMVASRIVASGVPCIVGLGNMQNEGLFFTLNPATGRGVTAVNSFARTDVALEDRGTYSIGNRSEPVEFMFAPGWRGPRDWDKEWRPLHDVDA…	0.858	23	0.902	23	0.982	12	0.948	0.927	Y	0.45	SignalP-noTM		extr 20, cyto 3.5, cyto_nucl 2.5, mito 2	ENATVSPAKLVAGAFILECESGQICESVAKAVEKRGGTLRRTFNSDVFHGISVQLSNLTAEEDKKALVAQFKGIKGTWPVQGLAQSSDSTAKSQPEDKLEEKSTPGQGRGELLEKRLAATPKTYKRHKCLRGRAEDDHVESPWNHLMTHVDKLHKEGYMGSGIKIAVVDTGVDYNHPALGGCFGPACKVATGDNFSNEGDKGDPLDCHGHGTIVASILAGHDKAKGFVGVAPNATIMAYRVLNCRATGSEDDMIAGWLKAKEDGAQIIISSSGFEGQNWAQRPLAMVASRIVASGVPCIVGLGNMQNEGLFFTLNPATGRGVTAVNSFARTDVALEDRGTYSIGNRSEPVEFMFAPGWRGPRDWDKEWRPLHDVDADFGDKPDDDLMGGKDVPIAIDDW…	991	none	0.2	cyto 8, pero 7.5, mito_pero 6.83333, E.R. 6.5, E.R._mito 5.5, nucl 4, cyto_golg 4	cyto	Cluster00057	P16271|P1P_LACLC|8e-25	3662|PspB(notPD0218)|PHI:3662|Q87ET0|2371|Xylellafastidiosa|Increasedvirulence(Hypervirulence)|2e-09	PF00082|Subtilase family|1.7E-34;PF06280|Fn3-like domain|1.2E-15;	PTHR10795:SF359||5.3E-52;PTHR10795:SF359||5.3E-52;PTHR10795:SF359||5.3E-52;PTHR10795||5.3E-52;PTHR10795||5.3E-52;PTHR10795||5.3E-52;	SSF52743||1.24E-62;SSF52743||1.24E-62;	-	-	PS00137|Serine proteases, subtilase family, histidine active site.|-;PS00138|Serine proteases, subtilase family, serine active site.|-;PS00136|Serine proteases, subtilase family, aspartic acid active site.|-;	-	-	-	G3DSA:3.50.30.30||2.5E-6;G3DSA:3.40.50.200||2.9E-67;G3DSA:3.40.50.200||2.9E-67;	-	-	PR00723|Subtilisin serine protease family (S8) signature|3.3E-16;PR00723|Subtilisin serine protease family (S8) signature|3.3E-16;PR00723|Subtilisin serine protease family (S8) signature|3.3E-16;
g4397.t1	Dreco_g4397	MKFSAGAAVAALASLVAADTITVQNLLTPYCTSRGFVGKIPCFRVVFTDGGGSRFSSKCGFASPANTCNGYWENQRSDVDLGGGYIFTSDGKTAYVRSGNGLYNARCVPQGDGRTPGMGCTLTGDTDSQS	0.595	19	0.696	19	0.868	2	0.806	0.755	Y	0.45	SignalP-noTM		extr 26	TITVQNLLTPYCTSRGFVGKIPCFRVVFTDGGGSRFSSKCGFASPANTCNGYWENQRSDVDLGGGYIFTSDGKTAYVRSGNGLYNARCVPQGDGRTPGMGCTLTGDTDSQS	111	none	0.06	extr 13, mito 10, cyto 5, E.R._mito 5, mito_pero 5	extr		-	-	-	-	-	-	-	-	-	-	-	-	-	-	-
g4404.t1	Dreco_g4404	MHFFSAINAVLAATVVGASATSAPAPITETVNVNNFSAKITIDGQQNGKMAIHFNVDAKDAEDVECSAKDLEPNLISGELNCNHPEFSFVVVNSVDEIYFTLRLLRKKLRTATLWGQDMVPTSRCEPDAAGGGLLCEQNGEMRMIIDNAQSPP	0.41	21	0.589	21	0.913	12	0.843	0.726	Y	0.45	SignalP-noTM		extr 13, cyto 4.5, cyto_nucl 4.5, mito 4, nucl 3.5	SAPAPITETVNVNNFSAKITIDGQQNGKMAIHFNVDAKDAEDVECSAKDLEPNLISGELNCNHPEFSFVVVNSVDEIYFTLRLLRKKLRTATLWGQDMVPTSRCEPDAAGGGLLCEQNGEMRMIIDNAQSPP	132	none	0.05	extr 14, cyto_nucl 7.33333, extr_plas 7.33333, cyto 7, cysk 5	extr		-	-	-	-	-	-	-	-	-	-	-	-	-	-	-
g4405.t1	Dreco_g4405	MTKTRINRLFILLPWAVAVVSASYAVAPQAALVSGTITGKSKILRGANGAVNSFLGITYAEKPQRFGLAVPPKPWKLPLNTSSFGSSCIQYIIKTDTGPGQDILDELFNSHPPESEDCLSINAFAPANPAPPKDVLLSLTFPGAASSWATASSISPVFGFPNAHDIPVSQRNLGLHNQRLALDWVQANAKAFGGDPGRVTIWGESASAMSTDLHLLAYADIHPPPFQRAILSSGQMSFGLLSTARNAHNGRAWNAVSARVGCSGSKDRLTCMRNIPAATLLKGLEESNQTFMPVTDYFTVPGGEARTSVQGAYIDDDRC	0.455	23	0.651	23	0.977	16	0.932	0.803	Y	0.45	SignalP-noTM		extr 27	YAVAPQAALVSGTITGKSKILRGANGAVNSFLGITYAEKPQRFGLAVPPKPWKLPLNTSSFGSSCIQYIIKTDTGPGQDILDELFNSHPPESEDCLSINAFAPANPAPPKDVLLSLTFPGAASSWATASSISPVFGFPNAHDIPVSQRNLGLHNQRLALDWVQANAKAFGGDPGRVTIWGESASAMSTDLHLLAYADIHPPPFQRAILSSGQMSFGLLSTARNAHNGRAWNAVSARVGCSGSKDRLTCMRNIPAATLLKGLEESNQTFMPVTDYFTVPGGEARTSVQGAYIDDDRC	296	none	0.09	mito 14, cyto_nucl 8.33333, mito_pero 8.33333, cyto 7.5, cyto_pero 5.83333	mito	Cluster06619	P32946|LIP2_CANRU|6e-22	541|PHI:541|LIP1|AAU87359|332648|Botrytiscinerea|Unaffectedpathogenicity|2e-19	PF00135|Carboxylesterase family|5.6E-18;PF00135|Carboxylesterase family|1.2E-25;	PTHR11559||3.3E-47;PTHR11559:SF142||3.3E-47;	SSF53474||1.87E-48;	-	-	-	-	-	-	G3DSA:3.40.50.1820||9.0E-57;	-	-	-
g4420.t1	Dreco_g4420	MALNVALNVALNMVSIRLVAPALLFATPAIVNGQVDLGSLSSFGLLAATDLTSLGTSIVDGNIGTYPGFFMTGFPPGIVNNGAIYGPDAITQKAQNDLSAAMSQAIALTATAVSLSLELGGLVFSPGVIDMPEEGSASLSSTVYLVTNDPSAMWIFRIPGSFTIAPTGAVELINGGVSCNVIWLVGNEVFAEGPSALKGNFLVGRDIILGNGTTSMGGLYSSDGQVALDNGTVDRCVSPPRSESTVTAMTSTAMTGSDASTTTMTDPPPTTLGNCQHDHSHIDGGWYREITHRGNRHHLDSGRCREITLYYSHNGYPFDAHAHGDAYCGY	0.338	34	0.42	34	0.848	15	0.566	0.499	Y	0.45	SignalP-noTM		extr 27	VDLGSLSSFGLLAATDLTSLGTSIVDGNIGTYPGFFMTGFPPGIVNNGAIYGPDAITQKAQNDLSAAMSQAIALTATAVSLSLELGGLVFSPGVIDMPEEGSASLSSTVYLVTNDPSAMWIFRIPGSFTIAPTGAVELINGGVSCNVIWLVGNEVFAEGPSALKGNFLVGRDIILGNGTTSMGGLYSSDGQVALDNGTVDRCVSPPRSESTVTAMTSTAMTGSDASTTTMTDPPPTTLGNCQHDHSHIDGGWYREITHRGNRHHLDSGRCREITLYYSHNGYPFDAHAHGDAYCGY	296	none	0.01	cyto 10, nucl 8, cyto_mito 8, extr 6, mito 6, cyto_golg 6	cyto	Cluster14082	-	-	PF11999|Protein of unknown function (DUF3494)|2.7E-35;	-	-	-	-	-	-	-	-	-	-	-	-
g4430.t1	Dreco_g4430	MNYNVLLLLAALSSSAVAQTTASSGRSSLFSACSEAAKAVSTAFAAFPTPTGAVMSYLEAAEKTAADPCSWIASAPTSLSAEVGSFSSQLSSLIAGNSAAFQQAISCAALIGSAATAPLATVTPYLHITDCAKPMATEQKKAVVSANAGPLPTGAAAAAVAGAALLGVAGLL	0.668	19	0.773	19	0.928	2	0.894	0.838	Y	0.45	SignalP-noTM		extr 27	TTASSGRSSLFSACSEAAKAVSTAFAAFPTPTGAVMSYLEAAEKTAADPCSWIASAPTSLSAEVGSFSSQLSSLIAGNSAAFQQAISCAALIGSAATAPLATVTPYLHITDCAKPMATEQKKAVVSANAGPLPTGAAAAAVAGAALLGVAGLL	153	none	0.03	extr 22, mito 10	extr		-	-	-	-	-	-	-	-	-	-	-	-	-	-	-
g4431.t1	Dreco_g4431	MSLRQVSIATTVGLLATGASAKTITVEVGKGSLTYSPDSITAAEGDIILFRFDSTHDVVAGDFQKPCQPASSGGFYSGTLPAGGKSSFSITVNNTDPIFYYCSISNHCQDGMVGVINQGQGLDTLDAYRSAAAKTTSSTAPNTAFGGTEPSSTKSSTTSSSKTASTTTSGAAAATSTQPASAERVAGTLVVVSSLALLMAALLAF	0.774	22	0.613	22	0.598	12	0.482	0.542	Y	0.45	SignalP-noTM		extr 23, mito 4	TITVEVGKGSLTYSPDSITAAEGDIILFRFDSTHDVVAGDFQKPCQPASSGGFYSGTLPAGGKSSFSITVNNTDPIFYYCSISNHCQDGMVGVINQGQGLDTLDAYRSAAAKTTSSTAPNTAFGGTEPSSTKSSTTSSSKTASTTTSGAAAATSTQPASAERVAGTLVVVSSLALLMAALLAF	183	none	0.06	plas 11, extr 10, mito 5, cyto 4	plas	Cluster00630	P0DN32|CUPR1_ARTBC|6e-24	-	-	PTHR34883||1.2E-37;	SSF49503||4.13E-18;	-	-	-	-	-	-	G3DSA:2.60.40.420||6.5E-15;	-	-	-
g4435.t1	Dreco_g4435	MKFACLLVLAAAAVASPVGSVDDYVKLLEKRQSFVSDTDYKKLKFYVQHTSAAYCNIGKAAGDPVTCRGTCNSVERNQVSIVSTFVGPLTAVGGYIAVDHARHEITLAIRGSNNIRNFITDILFIWQNCDLTPKCKVHTGFATAWREISKSVTQGIQDALEENPSYKIIITGHSLGGAVATIATAYLRRSGIVADVYTFGTPRVGNSHFADFMTTSHGGQWRVTHRDDPVPRLPPIFTGYRHMSPEYWLSNGNSDQVDYKLQNIKRCDGTANVACNAGTFGFNIVAHLNYLGRTSGCAPLPLQWKRDEEQQISNKQLENRLNEWSRRDQEFVKNGQE	0.502	21	0.648	21	0.967	1	0.822	0.742	Y	0.45	SignalP-noTM		extr 27	DDYVKLLEKRQSFVSDTDYKKLKFYVQHTSAAYCNIGKAAGDPVTCRGTCNSVERNQVSIVSTFVGPLTAVGGYIAVDHARHEITLAIRGSNNIRNFITDILFIWQNCDLTPKCKVHTGFATAWREISKSVTQGIQDALEENPSYKIIITGHSLGGAVATIATAYLRRSGIVADVYTFGTPRVGNSHFADFMTTSHGGQWRVTHRDDPVPRLPPIFTGYRHMSPEYWLSNGNSDQVDYKLQNIKRCDGTANVACNAGTFGFNIVAHLNYLGRTSGCAPLPLQWKRDEEQQISNKQLENRLNEWSRRDQEFVKNGQE	316	none	0.13	cyto 20, cyto_nucl 12, extr 6, E.R. 3, extr_plas 3	cyto	Cluster00405	O59952|LIP_THELA|4e-55	2924|PHI:2924|lip1|J9MXG1|59765|Fusariumoxysporumf.sp.Lycopersici|Unaffectedpathogenicity|3e-110	PF01764|Lipase (class 3)|7.9E-38;	PTHR21493||2.1E-57;	SSF53474||4.12E-54;	-	-	-	-	-	Coil||-;	G3DSA:3.40.50.1820||1.8E-66;	-	-	-
g4464.t1	Dreco_g4464	MTSAMTYLAKIGLQLPLFLHSLAATSASNGSSVPANGSSGSFTARAADSYDSPGGGGGGPDLFPAGFMDSVLVTAGSSSPLMQVVLFLYRQVGARLGLDPSVLLTLLGFLWALSKIGSQIWDHVWDAVDRHFMCAMYVSEYDHIYSELLKWLSLQQSIRTSRYLMAQTVWRSAWEEEEEEIETALFLTDGNDGEGERIYLNFSNQAAKIGPRYVPAIGLTTFWHGGTYFRVHRRRETLIDTNGWGSGTKDVEELRLSCFGRSMEPIKRLLAEAKSAYYHDRYRKTSIYRPKPKEMRRDSNMWHQVARRPIRPMRTVVLDAQEKHSVLADVNEYLHPATPRWYASRGIPLRRGYLFHGPPGTGKTSFSFALAGVFGIDIYVISLQDVNITEEDLAALFTR…	0.334	28	0.482	28	0.871	20	0.684	0.591	Y	0.45	SignalP-noTM		extr 9, mito 6, cyto 5.5, cyto_nucl 4, nucl 1.5, plas 1, pero 1, E.R. 1, golg 1, vacu 1	NGSSVPANGSSGSFTARAADSYDSPGGGGGGPDLFPAGFMDSVLVTAGSSSPLMQVVLFLYRQVGARLGLDPSVLLTLLGFLWALSKIGSQIWDHVWDAVDRHFMCAMYVSEYDHIYSELLKWLSLQQSIRTSRYLMAQTVWRSAWEEEEEEIETALFLTDGNDGEGERIYLNFSNQAAKIGPRYVPAIGLTTFWHGGTYFRVHRRRETLIDTNGWGSGTKDVEELRLSCFGRSMEPIKRLLAEAKSAYYHDRYRKTSIYRPKPKEMRRDSNMWHQVARRPIRPMRTVVLDAQEKHSVLADVNEYLHPATPRWYASRGIPLRRGYLFHGPPGTGKTSFSFALAGVFGIDIYVISLQDVNITEEDLAALFTRLPRRCIVLLEDIDTAGLKRDEAGDSKAE…	748	425 - KAEKKAKKKQ - 434	0.61	cyto 14.5, nucl 10, cyto_mito 8.33333, pero 3.5, plas 3	cyto	Cluster14085	Q54DY9|BCS1B_DICDI|1e-27	2715|PHI:2715|PEX6|I1RNL3|5518|Fusariumgraminearum|Reducedvirulence|1e-07	PF00004|ATPase family associated with various cellular activities (AAA)|1.0E-8;PF00004|ATPase family associated with various cellular activities (AAA)|4.1E-6;PF08740|BCS1 N terminal|1.0E-39;	PTHR23070:SF11||1.2E-172;PTHR23070||1.2E-172;PTHR23070||1.2E-172;PTHR23070||1.2E-172;PTHR23070:SF11||1.2E-172;PTHR23070:SF11||1.2E-172;PTHR23070||1.2E-172;PTHR23070:SF11||1.2E-172;	SSF52540||7.52E-9;SSF52540||3.87E-18;	-	-	PS00674|AAA-protein family signature.|-;	-	SM00382|ATPases associated with a variety of cellular activities|2.5E-11;SM01024||6.5E-35;	Coil||-;	G3DSA:3.40.50.300||1.3E-50;G3DSA:3.40.50.300||1.3E-50;	-	-	-
g4467.t1	Dreco_g4467	MRCYPLLIAALADLLMAASAPRPAAHYRMPLPVDGQAASVDGQAASVAAKKVGPQVGHFVQPIDHRNPSRGNFTQRFWWNADYYRGPGSPVIMMAPIEDDPSWKVSWMNSSKLPGAFAEAVGGAIVMMEHRYYGESSPVANLTAETLQPVNLDNMIQDIAGSSKPDMAPWVLTGCSYAGALTAWTHHFAPGTFWAYHASCATVQAIESYSAYWDAVEAVLPRNCSADMKQVMAHIDDVFTTGTNESRQEIKTRFGFGDLKHDDDFLAALAETLPAWQAGQFFHGDMGVTRMCNYVENIWPADGNGTGHFGTATAEIPGKEGVGGKKAMDGLSKWYRELAIPETCSWYDDYYKDYDKNTVECFDTYNPLSPRYTNTSTSHTWGRQYEWVKCNEPWGQFRV…	0.194	18	0.399	18	0.888	17	0.82	0.626	Y	0.45	SignalP-noTM		extr 21, mito 4	SAPRPAAHYRMPLPVDGQAASVDGQAASVAAKKVGPQVGHFVQPIDHRNPSRGNFTQRFWWNADYYRGPGSPVIMMAPIEDDPSWKVSWMNSSKLPGAFAEAVGGAIVMMEHRYYGESSPVANLTAETLQPVNLDNMIQDIAGSSKPDMAPWVLTGCSYAGALTAWTHHFAPGTFWAYHASCATVQAIESYSAYWDAVEAVLPRNCSADMKQVMAHIDDVFTTGTNESRQEIKTRFGFGDLKHDDDFLAALAETLPAWQAGQFFHGDMGVTRMCNYVENIWPADGNGTGHFGTATAEIPGKEGVGGKKAMDGLSKWYRELAIPETCSWYDDYYKDYDKNTVECFDTYNPLSPRYTNTSTSHTWGRQYEWVKCNEPWGQFRVGGPNATNGIVSKHYTSEY…	562	none	0.08	cyto 12, mito 12, cyto_mito 12	cyto	Cluster00346	D4AYS6|A1345_ARTBC|1e-28	-	PF05577|Serine carboxypeptidase S28|7.1E-38;	PTHR11010:SF23||1.6E-110;PTHR11010||1.6E-110;PTHR11010:SF23||1.6E-110;PTHR11010||1.6E-110;	SSF53474||1.25E-9;SSF53474||1.25E-9;SSF53474||1.25E-9;	-	-	-	-	-	-	G3DSA:3.40.50.1820||2.3E-8;	-	-	-
g4468.t1	Dreco_g4468	MTNVLPALVLALAALTLAAPGHGAPNMAGGFTGRLPEGTEETPVVWDVQAFPDGPTLTLNGTVQSVHDQLRAINPNYEGDFDDHPLEKRTDWTGAGILCDRNLFGGTRPKGYAEAIRYLRRLRGRPRMGPGPRKCGRVSCSYLTAIWLCNDTAEEKRLESWNSVVSGIEAIWNKCNPSQCCYRGGQIFHWTHWNIMMTSDSC	0.753	24	0.809	24	0.972	11	0.872	0.843	Y	0.45	SignalP-noTM		extr 15, cyto 5, mito 4, pero 2	PNMAGGFTGRLPEGTEETPVVWDVQAFPDGPTLTLNGTVQSVHDQLRAINPNYEGDFDDHPLEKRTDWTGAGILCDRNLFGGTRPKGYAEAIRYLRRLRGRPRMGPGPRKCGRVSCSYLTAIWLCNDTAEEKRLESWNSVVSGIEAIWNKCNPSQCCYRGGQIFHWTHWNIMMTSDSC	178	120 - RRLRGRPRMGPGP - 132	0.16	extr 29, cyto_nucl 2	extr	Cluster08028	-	-	-	PTHR35605:SF1||3.8E-23;PTHR35605||3.8E-23;	-	-	-	-	-	-	-	-	-	-	-
g4469.t1	Dreco_g4469	MRFLATSLVLVGLVAVPALSAPRSRRRSASSSASASVPASAAVGVAASPQPTVTVTVTVTAPAPAAASPSSSSSGAAAAAGSSPSSSSSSPSSPATYGNGSFKNTTTSTRGQNVLYWGQNGGGARENNDLSSYCTDSSGVDIVILSFLYQYGNGVLAPGGTIGQSCTISNGQGQGCDELAKAIDVCKSRGVKVLLSLGGAVGTYGLGSQQEAEAIGQSLWDSYGKSGGGGGGGGNGTYGAAGRPFGQTFVDGWDFDIESNNGNSFYPYLIAKLRANFASDPSSTYYITGAPQCPLPEPNMSGMIGGAQFDYLFVQFYNNPSCSVDGTINWDGWKGHLAGTPSAGAKIFIGVPAAPLGATGTDSGAKYYLDPSRLATLVNQHKSDAAFGGVMMWAAAFSD…	0.293	21	0.509	21	0.962	2	0.877	0.708	Y	0.45	SignalP-noTM		extr 26	PRSRRRSASSSASASVPASAAVGVAASPQPTVTVTVTVTAPAPAAASPSSSSSGAAAAAGSSPSSSSSSPSSPATYGNGSFKNTTTSTRGQNVLYWGQNGGGARENNDLSSYCTDSSGVDIVILSFLYQYGNGVLAPGGTIGQSCTISNGQGQGCDELAKAIDVCKSRGVKVLLSLGGAVGTYGLGSQQEAEAIGQSLWDSYGKSGGGGGGGGNGTYGAAGRPFGQTFVDGWDFDIESNNGNSFYPYLIAKLRANFASDPSSTYYITGAPQCPLPEPNMSGMIGGAQFDYLFVQFYNNPSCSVDGTINWDGWKGHLAGTPSAGAKIFIGVPAAPLGATGTDSGAKYYLDPSRLATLVNQHKSDAAFGGVMMWAAAFSDANVNNGCTYAQQAKRILTTGA…	401	none	0.26	mito 16.5, cyto_mito 11.3333, nucl 7.5, cyto_nucl 6, extr 5	mito	Cluster00774	E9F9R9|CHI2_METRA|1e-124	2388|PHI:2388|Chi2|0|5530|Metarhiziumanisopliae|Mixedoutcome|6e-124	PF00704|Glycosyl hydrolases family 18|3.3E-18;	PTHR11177||8.9E-43;	SSF51445||1.01E-63;	-	-	-	-	-	-	G3DSA:3.20.20.80||2.2E-83;	-	-	-
g4476.t1	Dreco_g4476	MKSHHSWFIDSMRHEHLCILIHILIRIVMADDASFRPALIVVDFQEDFCPPNGSLAVPDGRSIAPQINELLTCPFAVKIATRDWHPPNHISFAPNHPPASTTVTVRHPTEPHREYSTALWPVHCVQSTPGAELVPELDAALLHDVVDKGTDPRFEMYSAFYDPFTISDTGLTDRLKAERITDVFVVGLAADFCVRATAEHARDEGFRSHIIEQATRPVVPDKWPECRRDILAKGVLIVSAQGPEVSRVRSLAVA	0.772	31	0.604	31	0.811	30	0.443	0.517	Y	0.45	SignalP-noTM		extr 12, plas 7, cyto 2, pero 2, golg 2, cyto_pero 2	DASFRPALIVVDFQEDFCPPNGSLAVPDGRSIAPQINELLTCPFAVKIATRDWHPPNHISFAPNHPPASTTVTVRHPTEPHREYSTALWPVHCVQSTPGAELVPELDAALLHDVVDKGTDPRFEMYSAFYDPFTISDTGLTDRLKAERITDVFVVGLAADFCVRATAEHARDEGFRSHIIEQATRPVVPDKWPECRRDILAKGVLIVSAQGPEVSRVRSLAVA	223	none	0.05	cysk 26, cyto 3	cysk	Cluster00891	Q9USS0|PNC1_SCHPO|4e-35	-	PF00857|Isochorismatase family|6.0E-26;	PTHR11080:SF2||7.0E-62;PTHR11080||7.0E-62;	SSF52499||2.75E-43;	-	-	-	-	-	-	G3DSA:3.40.50.850||1.6E-53;	-	-	-
g4477.t1	Dreco_g4477	MKRPTLRGAAFSAHLVGLALGQGDGNGTFASVVLIEDQLVHFSCEGVTLTGPHEGVATRTLVGVTPSGGPLVGTVTATLIGPTPGTNTVPPPADCSEICVTTVQITITPPSSPGAGSSSPGVGSPTPGAGSSIPAVESSSPAVGSPTPGAGSSSPAVESSTPAAGGSSSSVITETHIGSTSGTSTVMPSSDCTDICVTTVQVTIIATTPAAGTSGTAPNASNLVTRTTTGPTAGTSTIPPAADCTTSCQTTLLVTVAPIIDPPKPIPSVSATIYSTFSTTGPTAGTSTYPVPDGCTEGCVATVMVTNAPIIDPPKPTPSVGGPSVSGTSYTTFSTTGPTAGTSTYPVPAGCTENCVATVMVTEAPVVDPSPNVSSPSVSGTSYTTFSTTGPTAGTSTYP…	0.413	22	0.503	22	0.845	1	0.602	0.556	Y	0.45	SignalP-noTM		extr 21, mito 3, cyto 3, cyto_mito 3	GDGNGTFASVVLIEDQLVHFSCEGVTLTGPHEGVATRTLVGVTPSGGPLVGTVTATLIGPTPGTNTVPPPADCSEICVTTVQITITPPSSPGAGSSSPGVGSPTPGAGSSIPAVESSSPAVGSPTPGAGSSSPAVESSTPAAGGSSSSVITETHIGSTSGTSTVMPSSDCTDICVTTVQVTIIATTPAAGTSGTAPNASNLVTRTTTGPTAGTSTIPPAADCTTSCQTTLLVTVAPIIDPPKPIPSVSATIYSTFSTTGPTAGTSTYPVPDGCTEGCVATVMVTNAPIIDPPKPTPSVGGPSVSGTSYTTFSTTGPTAGTSTYPVPAGCTENCVATVMVTEAPVVDPSPNVSSPSVSGTSYTTFSTTGPTAGTSTYPVPAGCTENCVATVMVTNAPIID…	995	none	0.13	cyto_nucl 14, nucl 13.5, cyto 11.5, mito 4	cyto_nucl	Cluster07590	-	-	PF10528|GLEYA domain|1.3E-14;	-	-	-	-	-	-	-	-	G3DSA:3.90.182.10||1.9E-6;	-	-	-
g4481.t1	Dreco_g4481	MISPLFCLLALVGVGVADRWVGMESLPDGLYSGQTHDDGSTTMTSLQSGAKFTFPLVGDDGERAKRSVDDALAKRDTSCWGYELDHDGVDEGVVALKNWAGNNGQTISSGDTTSYFGFNRKGVYVYYCINQAHSQGNLDINDINYALRNMDGTCRRYEAGYFLWPGTPELVGKCRSGTAVCLG	0.706	18	0.808	18	0.953	9	0.918	0.868	Y	0.45	SignalP-noTM		extr 24, golg 2	RWVGMESLPDGLYSGQTHDDGSTTMTSLQSGAKFTFPLVGDDGERAKRSVDDALAKRDTSCWGYELDHDGVDEGVVALKNWAGNNGQTISSGDTTSYFGFNRKGVYVYYCINQAHSQGNLDINDINYALRNMDGTCRRYEAGYFLWPGTPELVGKCRSGTAVCLG	165	none	0.09	extr 18, nucl 7.5, cyto_nucl 7.5, cyto 4.5	extr		-	-	-	-	-	-	-	-	-	-	-	-	-	-	-
g4484.t1	Dreco_g4484	MHASITILVAALAGLGLAAPWSKADFRAPVATGNDYFYDQGNRGDTWGNGQRQEAEWDNYPGDNQWDDGENDESFSFCSRNPRACGLIVD	0.608	19	0.749	19	0.951	4	0.923	0.843	Y	0.45	SignalP-noTM		extr 27	PWSKADFRAPVATGNDYFYDQGNRGDTWGNGQRQEAEWDNYPGDNQWDDGENDESFSFCSRNPRACGLIVD	71	none	0.09	extr 24, nucl 7	extr		-	-	-	-	-	-	-	-	-	-	-	-	-	-	-
g4485.t1	Dreco_g4485	MRIASLVGLAALAGPSHAVLVPRDYANNDYYVIHIEKRASVAPIADHLNMVYERQLGDLPHHYVFRAPKSEHDIVQRELLERRRRKRDRPVDLHLDAILLSARQEPRMRLKKHVVAPRHEEPLRPRARGPPAPAALAEQLSVMKALDIADPIFKEQWHLFNTIELGHDVNVTGLWLEGVTGKGATVAIVDDGVDMYSDDLKENYFAKGSWDFNDSGPEPKPRLSDDRHGTRCAGEVAAVRNDVCGVGVAYDAKFAGIRILSKPISDADEAEAMIYGYQENQIYSCSWGPRDDGRSMEAPGVLIRRAMLRGIQEGRGGLGSIYVFASGNGAASDDNCNFDGYTNSIYSITVGAVDRAGQHPYYSELCSAQLVVTYSSGSGDSIHTTDVGKNRCAVGHGGT…	0.734	19	0.707	19	0.766	1	0.663	0.683	Y	0.45	SignalP-noTM		extr 14, mito 4, cyto 4, cyto_mito 4	LVPRDYANNDYYVIHIEKRASVAPIADHLNMVYERQLGDLPHHYVFRAPKSEHDIVQRELLERRRRKRDRPVDLHLDAILLSARQEPRMRLKKHVVAPRHEEPLRPRARGPPAPAALAEQLSVMKALDIADPIFKEQWHLFNTIELGHDVNVTGLWLEGVTGKGATVAIVDDGVDMYSDDLKENYFAKGSWDFNDSGPEPKPRLSDDRHGTRCAGEVAAVRNDVCGVGVAYDAKFAGIRILSKPISDADEAEAMIYGYQENQIYSCSWGPRDDGRSMEAPGVLIRRAMLRGIQEGRGGLGSIYVFASGNGAASDDNCNFDGYTNSIYSITVGAVDRAGQHPYYSELCSAQLVVTYSSGSGDSIHTTDVGKNRCAVGHGGTSAAAPLAAGIFALVMEVRN…	818	82 - RRRRKR - 87	0.34	cyto 16, cyto_nucl 11.5, nucl 5, mito_pero 5, mito 4.5, pero 4.5	cyto	Cluster06917	O13359|KEX2_CANAW|0	306|PHI:306|KEX2|AAB80929|5476|Candidaalbicans|Reducedvirulence|0.0	PF01483|Proprotein convertase P-domain|2.7E-26;PF00082|Subtilase family|1.9E-37;	PTHR10795:SF416||8.7E-198;PTHR10795||8.7E-198;PTHR10795:SF416||8.7E-198;PTHR10795||8.7E-198;	SSF49785||5.1E-40;SSF52743||9.69E-89;	-	-	PS00138|Serine proteases, subtilase family, serine active site.|-;PS00137|Serine proteases, subtilase family, histidine active site.|-;	-	-	-	G3DSA:3.40.50.200||2.5E-99;G3DSA:2.60.120.260||1.4E-42;	-	-	PR00723|Subtilisin serine protease family (S8) signature|6.0E-17;PR00723|Subtilisin serine protease family (S8) signature|6.0E-17;PR00723|Subtilisin serine protease family (S8) signature|6.0E-17;
g4517.t1	Dreco_g4517	MRLWVGLVCACAASAALPNGDPTAPCSGYRASNVVTTDSGLTADLTLASDACNAFGTDLKHLTLEVVYETDDRVHVKIQDRDDQVYQVPEDVFPRPGGRSPAAASNLRFDYIASPFSFQIRRAASNEILFDTSAASLVFESQYLRLRTSLPDNPYLYGLGEHSDPLRLKTSSYVRTLWNRDSYGVPLESNLYGTHPFYLEHRKTGSHGVFLLNSNGMDVVIDKTPQGRQYLEYNTLGGVFDFWFVAGPSPIEAVQQYGRIAGTPAMQPYWGLGFHQCRYGYQDVYDVAEVVQNYSQAGIPLETMWTDIDYMDRRRVFSLDPERFPLKTVRELVSQLHARDQHYIVMVDPAVAYHDYPPLHQGVESDAFLRRDNGSLWLGVVWPGLTVYPDWFSTKVAQY…	0.248	17	0.468	17	0.945	9	0.877	0.689	Y	0.45	SignalP-noTM		extr 22, cyto 2.5, mito 2, cyto_nucl 2	PNGDPTAPCSGYRASNVVTTDSGLTADLTLASDACNAFGTDLKHLTLEVVYETDDRVHVKIQDRDDQVYQVPEDVFPRPGGRSPAAASNLRFDYIASPFSFQIRRAASNEILFDTSAASLVFESQYLRLRTSLPDNPYLYGLGEHSDPLRLKTSSYVRTLWNRDSYGVPLESNLYGTHPFYLEHRKTGSHGVFLLNSNGMDVVIDKTPQGRQYLEYNTLGGVFDFWFVAGPSPIEAVQQYGRIAGTPAMQPYWGLGFHQCRYGYQDVYDVAEVVQNYSQAGIPLETMWTDIDYMDRRRVFSLDPERFPLKTVRELVSQLHARDQHYIVMVDPAVAYHDYPPLHQGVESDAFLRRDNGSLWLGVVWPGLTVYPDWFSTKVAQYWNGAFARFFSKESGVDI…	933	none	0.24	nucl 21, cyto_nucl 16.5, cyto 8	nucl	Cluster01389	Q4WRH9|AGDC_ASPFU|0	1071|PHI:1071|Gas1|CAF05793|5270|Ustilagomaydis|Lossofpathogenicity|9e-41	PF16863|N-terminal barrel of NtMGAM and CtMGAM, maltase-glucoamylase|1.3E-30;PF13802|Galactose mutarotase-like|1.2E-12;PF01055|Glycosyl hydrolases family 31|1.8E-139;	PTHR22762||0.0;PTHR22762||0.0;PTHR22762:SF67||0.0;PTHR22762:SF67||0.0;	SSF51011||1.22E-16;SSF51445||4.45E-76;SSF51445||4.45E-76;SSF74650||8.79E-52;	-	-	PS00129|Glycosyl hydrolases family 31 active site.|-;	-	-	-	-	-	-	-
g4535.t1	Dreco_g4535	MLLSLAVAGLMATVTTACSGGSNDGHDDGHPHTISRRSACVPTEFDVSVNLCCSGNETPCGTQEQFESALAMANEKFGPAKVKFTLKKFNIFQNNTCTEADVTQDSAAEIKKTVCEHGSGIIDILYLPTNLGHGISKGFSNIPNITNGWPISAILHGIDGPRMAMDTLTGVTDQYGTVTNDLLLTHELGHAFGLYHDDGHEDSLMYPSVGPLTGHRKSFKYAFNETEKDIICSVANKRKAEGGEILGDKLKSTGPADSAEPGSAPTRQPVGPKNGTYDSEPLYPNPHDAHNANKTRPSCGRHRKGAHKGSHKGSDKGSVPGPATPAGQRTPNAPPADGSMPIVNPSGGNNGQISNGGNGQHPHPSSPQANQCLCTCPGLQQPLAAAVLPTRPDLLYIPK…	0.481	18	0.654	18	0.953	1	0.869	0.77	Y	0.45	SignalP-noTM		extr 26	SGGSNDGHDDGHPHTISRRSACVPTEFDVSVNLCCSGNETPCGTQEQFESALAMANEKFGPAKVKFTLKKFNIFQNNTCTEADVTQDSAAEIKKTVCEHGSGIIDILYLPTNLGHGISKGFSNIPNITNGWPISAILHGIDGPRMAMDTLTGVTDQYGTVTNDLLLTHELGHAFGLYHDDGHEDSLMYPSVGPLTGHRKSFKYAFNETEKDIICSVANKRKAEGGEILGDKLKSTGPADSAEPGSAPTRQPVGPKNGTYDSEPLYPNPHDAHNANKTRPSCGRHRKGAHKGSHKGSDKGSVPGPATPAGQRTPNAPPADGSMPIVNPSGGNNGQISNGGNGQHPHPSSPQANQCLCTCPGLQQPLAAAVLPTRPDLLYIPKQPGYSPTGSNRDQGTKNL…	646	301 - RHRKGAHKGSHK - 312	0.72	nucl 26, cyto 4	nucl		-	-	PF13582|Metallo-peptidase family M12B Reprolysin-like|3.2E-5;	PTHR23106||1.2E-13;PTHR23106:SF14||1.2E-13;	SSF55486||7.84E-11;	-	-	-	-	-	-	G3DSA:3.40.390.10||8.2E-6;	-	-	-
g4538.t1	Dreco_g4538	MRNNIFAAIGLLLAGAGALAVGSDEACAKVSDLWISHIDSHKPGSPKVPAALAYQCLNSVPLDRTAALDLVYSLEPYLQFQSDAAYKADPPTGYPFPAYDLFANLAKVKQNLKDRKYTSEYTFQVDLLETVFMPGHDSHFQFIPDLLFNAVAWSRTDVLASVSEDGLSLPAIKRYDDVRKNPETAPVIAAINGIDAATFMESIAARGTEWTDIDAGYNSMFFDRSTYSKTAQVGNFVSGYNYIGLLYPGATTTYTYANNGTPVTVDNLAVLQGDWRTLRNGTAVFNMFCAPKGSSTPIPQPTHPYIFDVPSMAAAAKGHFFTYPEPKMATSDLVVSGYYLEDSGLENTAVLALAAFASNSTAEFQSVCRTFLEMAAGAGKTKLVIDLQSNVGGLFVQFI…	0.37	21	0.582	21	0.958	12	0.918	0.763	Y	0.45	SignalP-noTM		extr 24, pero 2	GSDEACAKVSDLWISHIDSHKPGSPKVPAALAYQCLNSVPLDRTAALDLVYSLEPYLQFQSDAAYKADPPTGYPFPAYDLFANLAKVKQNLKDRKYTSEYTFQVDLLETVFMPGHDSHFQFIPDLLFNAVAWSRTDVLASVSEDGLSLPAIKRYDDVRKNPETAPVIAAINGIDAATFMESIAARGTEWTDIDAGYNSMFFDRSTYSKTAQVGNFVSGYNYIGLLYPGATTTYTYANNGTPVTVDNLAVLQGDWRTLRNGTAVFNMFCAPKGSSTPIPQPTHPYIFDVPSMAAAAKGHFFTYPEPKMATSDLVVSGYYLEDSGLENTAVLALAAFASNSTAEFQSVCRTFLEMAAGAGKTKLVIDLQSNVGGLFVQFIDLLHQIIPDIEEDYYFRGKMS…	673	none	0.05	cyto 13.5, cyto_nucl 11, cyto_mito 11, mito 8	cyto	Cluster00544	-	-	PF03572|Peptidase family S41|1.2E-5;	PTHR37049||2.0E-175;PTHR37049:SF2||2.0E-175;	SSF52096||8.45E-8;SSF52096||8.45E-8;	-	-	-	-	-	-	G3DSA:3.90.226.10||1.5E-10;G3DSA:3.90.226.10||1.5E-10;	-	-	-
g4539.t1	Dreco_g4539	MRNGILVATGLLLTSAAAAVVGEIDHPRTPPTRQPPXXXXXXYPFAAHDIFTSLAMVKRKLLDGMYGGEYAFQQDLNKSSFSPAHDSHFIFVPDLMAKAAQWKRTEVFVSISEDGSALPVIKRYVDVRDNPETAPVITHINDVDAASCVEALARGVGGNFHFGGYSGFIYPGATTGYLVENGSKSDTENLPTLHGNWGNRRDGTAVHKAFCNIENPSPLGRFQGTGTSSRPEAATSNLAVPGYYLHGPGLDDVAVLRIASFVGNSTTEFQSVCRKFLRMTAAAGKTKLVIDIKANVDGIYLLTLDLLHQLVPDIEEDIFLRGMMSDGSIVLYTDYRFGVDVEDRKFSKFEDKFSSQIFQGTNYTTLYRWDLEDPLITTNKQYGAGINITGYGALSKPEK…	0.416	20	0.609	20	0.937	4	0.894	0.763	Y	0.45	SignalP-noTM		extr 22, mito 2, cyto 2, cyto_mito 2	VGEIDHPRTPPTRQPPXXXXXXYPFAAHDIFTSLAMVKRKLLDGMYGGEYAFQQDLNKSSFSPAHDSHFIFVPDLMAKAAQWKRTEVFVSISEDGSALPVIKRYVDVRDNPETAPVITHINDVDAASCVEALARGVGGNFHFGGYSGFIYPGATTGYLVENGSKSDTENLPTLHGNWGNRRDGTAVHKAFCNIENPSPLGRFQGTGTSSRPEAATSNLAVPGYYLHGPGLDDVAVLRIASFVGNSTTEFQSVCRKFLRMTAAAGKTKLVIDIKANVDGIYLLTLDLLHQLVPDIEEDIFLRGMMSDGSIVLYTDYRFGVDVEDRKFSKFEDKFSSQIFQGTNYTTLYRWDLEDPLITTNKQYGAGINITGYGALSKPEKALFVAENIVVLHDGI	394	none	0.13	cyto 17, extr 5, nucl 4, E.R. 4	cyto	Cluster00544	-	-	-	PTHR37049:SF2||4.1E-60;PTHR37049||4.1E-60;	-	-	-	-	-	-	-	G3DSA:3.90.226.10||5.7E-4;	-	-	-
g4545.t1	Dreco_g4545	MALSSRTRLALAAGLLLGLVDGQQYKIDTVDNIKTSASTLAYDLMLFYPGNKTGGIPGTLPGPPPAGPYYWWEGGAMMGTYIDYWHWTGDSSYNKVVMQGMLHQVGENENYMPANHTASLGNDDQGFWGMSAMLAAENKFPNPPDDKPQWLALAQAVWNTMVDPSRHDTTCNGGMRWQIPFSNAGYGYKNTIANGCFFNIGARLARYTGNKTYAEHAEKTWDWLWGVNYINHDNYYVYDGAHVDMNCSDVNKATFSYNAAIMLQGAAFLYNFTNGDEKWKTRVDKLTEGLLNNFFPKGIAYEVPCEGRQGACTPDMLSFKGYVHRWLAVVTQVAPYTRDKIMPILQKSTQAAVQQCTGGATGRVCGFYWSGGKFVDPSVDKTTGAGEAMNVLAAVSSLL…	0.67	23	0.749	23	0.906	1	0.837	0.796	Y	0.45	SignalP-noTM		extr 25	QYKIDTVDNIKTSASTLAYDLMLFYPGNKTGGIPGTLPGPPPAGPYYWWEGGAMMGTYIDYWHWTGDSSYNKVVMQGMLHQVGENENYMPANHTASLGNDDQGFWGMSAMLAAENKFPNPPDDKPQWLALAQAVWNTMVDPSRHDTTCNGGMRWQIPFSNAGYGYKNTIANGCFFNIGARLARYTGNKTYAEHAEKTWDWLWGVNYINHDNYYVYDGAHVDMNCSDVNKATFSYNAAIMLQGAAFLYNFTNGDEKWKTRVDKLTEGLLNNFFPKGIAYEVPCEGRQGACTPDMLSFKGYVHRWLAVVTQVAPYTRDKIMPILQKSTQAAVQQCTGGATGRVCGFYWSGGKFVDPSVDKTTGAGEAMNVLAAVSSLLIDSARPPVTNSTGGISKGNVNAG…	442	none	0.01	cyto 12.5, cyto_nucl 7.5, mito 7, E.R. 6, extr 4, mito_pero 4	cyto	Cluster00066	P36091|DCW1_YEAST|1e-102	-	PF03663|Glycosyl hydrolase family 76|8.8E-150;	PTHR12145:SF23||3.3E-249;PTHR12145||3.3E-249;	SSF48208||5.53E-59;	-	-	-	-	-	-	G3DSA:1.50.10.10||4.3E-24;	-	PIRSF016302||6.8E-185;	-
g4546.t1	Dreco_g4546	MQLTQTLVATLMAASTAFAAPTGQGEVMARAANGAQWTIRDLRRVCAQDDSSCTWTFGIDARDGTATTGCKYVVAAAHASRANGGPATCGDYTITSGWSGQFGEGNGFTTFSVINKKKQIAWPAYTDKSVQTGGVVKPDLSFDVKVLG	0.616	20	0.681	20	0.842	13	0.758	0.723	Y	0.45	SignalP-noTM		extr 22, mito 3, cyto 1.5, cyto_nucl 1.5	PTGQGEVMARAANGAQWTIRDLRRVCAQDDSSCTWTFGIDARDGTATTGCKYVVAAAHASRANGGPATCGDYTITSGWSGQFGEGNGFTTFSVINKKKQIAWPAYTDKSVQTGGVVKPDLSFDVKVLG	128	none	0.05	extr 18, cyto 9.5, cyto_nucl 8, nucl 3.5	extr	Cluster02650	-	-	-	PTHR39602||5.3E-27;PTHR39602:SF1||5.3E-27;	-	-	-	-	-	-	-	-	-	-	-
g4547.t1	Dreco_g4547	MKSAIALLALPALGAAAAVSWRPRPFDPIEGVCTFGGSQGADGQMKIFEFVRCMEACAVSVTAAESCVGCDECLTQYRLTKLSSRQRDNTPITPKSRPATPYSTKTFSSPNSAVESPGAEPLVPAEQGDAVAAPDLSENLI	0.257	17	0.485	17	0.966	14	0.91	0.714	Y	0.45	SignalP-noTM		extr 19, mito 3, E.R. 3	AVSWRPRPFDPIEGVCTFGGSQGADGQMKIFEFVRCMEACAVSVTAAESCVGCDECLTQYRLTKLSSRQRDNTPITPKSRPATPYSTKTFSSPNSAVESPGAEPLVPAEQGDAVAAPDLSENLI	124	none	0.04	nucl 14.5, cyto_nucl 11, extr 9, cyto 6.5	nucl		-	-	-	-	-	-	-	-	-	-	-	-	-	-	-
g4549.t1	Dreco_g4549	MGHSLLLWAASLLTAAPAVFGAALPTADGRVSRQADGRPGSPPQIITGLYFPAKIAIHDAQGNPSWSWGSDDYDGQQVPSRLKGCLKASGVLPDAKWANGGRSILAIVGSAAVMINHHPENPSTDKQITFGMCLDSAPFANTHSLELVTPQRLAIATTSDSSVGNVRIVDPTVGAQNPDPPLLQGLDGMTACHSLVWDDEAGLLWAVGNDQPPLGTTPSRSILNSYAFDRRSGAFDSAPAGTYVIGPPQMLSQEWPGPKETWWDGSHHATPVPNKRQLFISTDLDVHLFDMGTKTFRHGDEVLKTVPSLRAFQPGPTHRDRLPRGDIKSASFDGKGNALFTQADWGDVLTRSVHRLGRRGAAQAVALSQQLYRSRWFAPAAGWRTSA	0.712	22	0.822	22	0.982	14	0.949	0.891	Y	0.45	SignalP-noTM		extr 24, mito 2	ALPTADGRVSRQADGRPGSPPQIITGLYFPAKIAIHDAQGNPSWSWGSDDYDGQQVPSRLKGCLKASGVLPDAKWANGGRSILAIVGSAAVMINHHPENPSTDKQITFGMCLDSAPFANTHSLELVTPQRLAIATTSDSSVGNVRIVDPTVGAQNPDPPLLQGLDGMTACHSLVWDDEAGLLWAVGNDQPPLGTTPSRSILNSYAFDRRSGAFDSAPAGTYVIGPPQMLSQEWPGPKETWWDGSHHATPVPNKRQLFISTDLDVHLFDMGTKTFRHGDEVLKTVPSLRAFQPGPTHRDRLPRGDIKSASFDGKGNALFTQADWGDVLTRSVHRLGRRGAAQAVALSQQLYRSRWFAPAAGWRTSA	365	none	0.17	cyto_nucl 16.5, cyto 15.5, nucl 14.5	cyto_nucl	Cluster02161	-	-	-	-	SSF50952||2.48E-5;SSF50952||2.48E-5;	-	-	-	-	-	-	-	-	-	-
g4556.t1	Dreco_g4556	MFAPSCLVLLAAALGASAKPVPETCTTTMMAPFPQMQMGPTLTVWPTTVVETAAVDCGDCLLQVGHRGRGPGPVRQITATVTAAEPSTTTVYECKATGN	0.818	19	0.863	19	0.954	11	0.903	0.885	Y	0.45	SignalP-noTM		extr 16, vacu 4, E.R. 3, cyto 2	PVPETCTTTMMAPFPQMQMGPTLTVWPTTVVETAAVDCGDCLLQVGHRGRGPGPVRQITATVTAAEPSTTTVYECKATGN	80	none	0.05	extr 31	extr		-	-	-	-	-	-	-	-	-	-	-	-	-	-	-
g4567.t1	Dreco_g4567	MRVSSSVLSAGLTVLLCSSGALGQNSHNSAIDTRLRQLEKALQLRVGGDDAAYRDGNSRSESSCFRRWWTCHDTRFFDRHRLANQTSHRLSTVSQIDADIDIPNYNGSDAQKFPDKVTAKTSTAVANKTSEGWSIAVTVSGGIGEVKSLAGDVGFDHTWSRASARTVTKEVMTEAPCLPGFRCFILTYTYHVTIDGFCRPEPWLDCGGEMNACKLNRNSDGSKSALAEMECDQYTDYAFWNCDRRAKPCQVYTPLLHADGSPVTSQAVMRQELSGNTIFRRASKKTKVGKKGGGRQMAKAGLPTFEFLDDVDSVLRSF	0.693	24	0.733	24	0.856	5	0.775	0.756	Y	0.45	SignalP-noTM		extr 24, mito 2	NSHNSAIDTRLRQLEKALQLRVGGDDAAYRDGNSRSESSCFRRWWTCHDTRFFDRHRLANQTSHRLSTVSQIDADIDIPNYNGSDAQKFPDKVTAKTSTAVANKTSEGWSIAVTVSGGIGEVKSLAGDVGFDHTWSRASARTVTKEVMTEAPCLPGFRCFILTYTYHVTIDGFCRPEPWLDCGGEMNACKLNRNSDGSKSALAEMECDQYTDYAFWNCDRRAKPCQVYTPLLHADGSPVTSQAVMRQELSGNTIFRRASKKTKVGKKGGGRQMAKAGLPTFEFLDDVDSVLRSF	294	280 - RRASKKTKVGKKGGGR - 295	0.26	extr 13, cyto 10.5, cyto_nucl 9, nucl 6.5, extr_plas 6.5	extr	Cluster01786	-	-	-	-	-	-	-	-	-	-	-	-	-	-	-
g4599.t1	Dreco_g4599	MKLIAALAVTLATLAVATPTPDENRFDIDPRDNILVARKSCSANRLKSDRCSGKKLRKQNSWHNCKDKGGKCCAKNANGSGGRNVKDGIGREDCGYCFSGQCKG	0.5	18	0.673	18	0.943	2	0.895	0.793	Y	0.45	SignalP-noTM		extr 26	PTPDENRFDIDPRDNILVARKSCSANRLKSDRCSGKKLRKQNSWHNCKDKGGKCCAKNANGSGGRNVKDGIGREDCGYCFSGQCKG	86	none	0.23	extr 26, cyto 3	extr	Cluster06419	-	-	-	-	-	-	-	-	-	-	-	-	-	-	-
g4604.t1	Dreco_g4604	MRPVSVAFLASSVLARGLQHADAGAVEVLAANADEADRSSAVPTRQGVIMNGNHSTDFISVHRRATKDELKKLNQYEIYAWLRNMDLRTDCFFITVARLLGYTTSEALQAAGVPAPPRGISHGVTLAQMYLAMDRLGVRLRLLTFQGYTELNSAGPQRTANLRCAPTMYRQRWSTTPPRTMGVAFRRRGGSSHIAIVRNAGRGPLTQYLDYQSNPFGQDISADVESSNICFYFYIDLDTSTGTFISGRRRPIREMNRQAAIDASSARLPAAATQPQQPAPTAQRTQSDPLEAPATDNHEVLVEDITDRLSRIHLSEGDAGNSANTVDDFDDISDDISDLSDSNEESTRDEPDGSKTAVAAGPSVLIPSGALDLATIGPNTIDSIFSNQLTSNECAQFLA…	0.236	24	0.356	16	0.675	15	0.581	0.478	Y	0.45	SignalP-noTM		extr 17, nucl 5, mito 2, cyto 2, cyto_mito 2	AVEVLAANADEADRSSAVPTRQGVIMNGNHSTDFISVHRRATKDELKKLNQYEIYAWLRNMDLRTDCFFITVARLLGYTTSEALQAAGVPAPPRGISHGVTLAQMYLAMDRLGVRLRLLTFQGYTELNSAGPQRTANLRCAPTMYRQRWSTTPPRTMGVAFRRRGGSSHIAIVRNAGRGPLTQYLDYQSNPFGQDISADVESSNICFYFYIDLDTSTGTFISGRRRPIREMNRQAAIDASSARLPAAATQPQQPAPTAQRTQSDPLEAPATDNHEVLVEDITDRLSRIHLSEGDAGNSANTVDDFDDISDDISDLSDSNEESTRDEPDGSKTAVAAGPSVLIPSGALDLATIGPNTIDSIFSNQLTSNECAQFLASEAIFLRTSGAARPPPNESNHERR…	705	none	0.65	nucl 25, cyto_nucl 17, cyto 5	nucl	Cluster00138	-	-	-	-	-	-	-	-	-	-	-	-	-	-	-
g4607.t1	Dreco_g4607	MAIPLLTVLFLCHVAAWELSNNPSSWNQTHWSLASHEYLPGHFQGRLSLANGYVGASVAAAGPFFEIDVNDTDPSGPPPTNGWPLFDPRISFSTISGFYNIQKNATGTNYPWLGQYGWDSFIAGIPHPTAIVFSFGSVYLDSTVSNETIFNYTQTLSMSTGMTEWSYKWKPPSMSAEFDLFFSVIFSRERPNVIASKATIVASKDIDGEVTDLLDGRSAVRSYLADKGRHSGRDGNGIFVSVHPNGLPNVTAWLVSNEDFATADKPRLAKGPYVSANESTVGQTFTLNLKAGQPVTLFKYVGVASTDKFPDAKDVATRAASSAKAKGWDGLVAEHVDAWKALMPPDSVDDFTDPTSGTLPLDPNLETLQIGTIASTFHLLQNLQPDGSNLNDNSIPVSG…	0.434	17	0.637	17	0.953	14	0.932	0.796	Y	0.45	SignalP-noTM		extr 27	ELSNNPSSWNQTHWSLASHEYLPGHFQGRLSLANGYVGASVAAAGPFFEIDVNDTDPSGPPPTNGWPLFDPRISFSTISGFYNIQKNATGTNYPWLGQYGWDSFIAGIPHPTAIVFSFGSVYLDSTVSNETIFNYTQTLSMSTGMTEWSYKWKPPSMSAEFDLFFSVIFSRERPNVIASKATIVASKDIDGEVTDLLDGRSAVRSYLADKGRHSGRDGNGIFVSVHPNGLPNVTAWLVSNEDFATADKPRLAKGPYVSANESTVGQTFTLNLKAGQPVTLFKYVGVASTDKFPDAKDVATRAASSAKAKGWDGLVAEHVDAWKALMPPDSVDDFTDPTSGTLPLDPNLETLQIGTIASTFHLLQNLQPDGSNLNDNSIPVSGLASDSYAGQIFWDADTW…	963	none	0.16	nucl 18, cyto_nucl 15.5, cyto 9, extr 2	nucl	Cluster03100	D4B5H9|ATC1_ARTBC|0	3076|CpATC1|PHI:3076|G8BDA6|5480|Candidaparapsilosis|mixedoutcome|5e-123	PF03632|Glycosyl hydrolase family 65 central catalytic domain|5.0E-24;PF03636|Glycosyl hydrolase family 65, N-terminal domain|7.7E-26;	PTHR11051:SF8||9.3E-250;PTHR11051:SF8||9.3E-250;PTHR11051||9.3E-250;PTHR11051:SF8||9.3E-250;PTHR11051||9.3E-250;PTHR11051||9.3E-250;	SSF74650||2.82E-15;SSF48208||9.01E-66;	-	-	-	-	-	-	G3DSA:1.50.10.10||1.4E-80;G3DSA:2.70.98.40||6.4E-22;G3DSA:2.60.420.10||1.2E-4;	-	-	-
g4611.t1	Dreco_g4611	MQSNILLLSTFVASVSATVNVYAALEARNGVRADLVPRQTLDAKCQSILVSIGKSVPTAPPKLASELIAHPQTDPCHFTPPAGLDSEFSSYSSELVSWAEKNKDILNECAELSRFQDITADCSGAVASKTSATTTATTSSTNTASTSSTTTNTETTTSSSTTSTNTGSTTSSTTGTSTGTTTTTTSRTTTTSSSAIQAGAARETAMALAAMAAAGLAMAL	0.668	18	0.732	18	0.87	4	0.812	0.775	Y	0.45	SignalP-noTM		extr 24, plas 1, E.R. 1, golg 1	VNVYAALEARNGVRADLVPRQTLDAKCQSILVSIGKSVPTAPPKLASELIAHPQTDPCHFTPPAGLDSEFSSYSSELVSWAEKNKDILNECAELSRFQDITADCSGAVASKTSATTTATTSSTNTASTSSTTTNTETTTSSSTTSTNTGSTTSSTTGTSTGTTTTTTSRTTTTSSSAIQAGAARETAMALAAMAAAGLAMAL	202	none	0.21	plas 15, extr_plas 9, cyto 5, nucl 4, mito 4, mito_nucl 4	plas		-	-	-	-	-	-	-	-	-	-	-	-	-	-	-
g4649.t1	Dreco_g4649	MRWAAQLLLGASLAAALPHLDSPRQRLLNGLELPDKYLTHNKAGSQPYTPGHRDPYDGKVDAVGRRLDPRPWRNGQGASVLGPYNRDRSRQSPDMVRPPSTDHGTMQNMRWSFADSHTRIEQGGWTRQTTIRELPSSVELAGVNMRLGAGVIRELHWHKEAEWAYVLEGEVRVTALDYDGGNFIDDLKKGDLWYFPSGVPHSLQGLGDNGTEFLLIFDDGRFSEESTFILTDWLAHTPKSVIAENFHLAPELFEHLPAGEKYIFQGSRPGSIDEERPRGKHVKKSEYRFTHKMLDQEPKRTTGGQVRITDSNNFPVSKTVAAAHAIIEPGALREMHWHPLADEWSFFIRGRARVTIFAAEGTARTFDYVAGDVGIVPKNMGHFVENIGDEPVEMLEIFR…	0.434	17	0.598	17	0.89	3	0.804	0.709	Y	0.45	SignalP-noTM		extr 12, mito 9, cyto 3, pero 2	PHLDSPRQRLLNGLELPDKYLTHNKAGSQPYTPGHRDPYDGKVDAVGRRLDPRPWRNGQGASVLGPYNRDRSRQSPDMVRPPSTDHGTMQNMRWSFADSHTRIEQGGWTRQTTIRELPSSVELAGVNMRLGAGVIRELHWHKEAEWAYVLEGEVRVTALDYDGGNFIDDLKKGDLWYFPSGVPHSLQGLGDNGTEFLLIFDDGRFSEESTFILTDWLAHTPKSVIAENFHLAPELFEHLPAGEKYIFQGSRPGSIDEERPRGKHVKKSEYRFTHKMLDQEPKRTTGGQVRITDSNNFPVSKTVAAAHAIIEPGALREMHWHPLADEWSFFIRGRARVTIFAAEGTARTFDYVAGDVGIVPKNMGHFVENIGDEPVEMLEIFRADQFRDFSLFQWMGETP…	433	none	0.21	cyto 13.5, cyto_nucl 12.5, pero 8, nucl 6.5	cyto	Cluster03216	O34714|OXDC_BACSU|1e-149	-	PF00190|Cupin|2.2E-18;PF00190|Cupin|1.7E-18;	PTHR31238||9.4E-104;PTHR31238:SF37||9.4E-104;	SSF51182||1.41E-90;	TIGR03404|bicupin_oxalic: bicupin, oxalate decarboxylase family|1.2E-168;	-	-	-	SM00835|Cupin|1.0E-9;SM00835|Cupin|3.9E-31;	-	G3DSA:2.60.120.10||6.3E-56;G3DSA:2.60.120.10||1.0E-65;	-	-	-
g4665.t1	Dreco_g4665	MPGKWTSLLLFFAALWGAAVLRHSPLLYGASSGPTGSWANSPINIVPTMAYADNEGDLFVAAAGHMALLHNTIIRGFNSIHQQASHVKPQDAADFLSYTRTWLKFLRAHHATEEATLFPVIKDVLEDQSVLGEMHHEHERLHGGLSELDKLIASTDQGAPYDARQLLDILESLRPTLEYHMHHEVSSIAELSRHSNAPARNSAEATAAGDLMATWGKNSISKGGLFDMVPFFLLNTDSTVDDGRWVAWPGMPKPVRWALVNVAGAVHGGWWRFASCNGHGRPRQLYATPVDDEAEAKNAEL	0.259	22	0.499	22	0.987	13	0.962	0.749	Y	0.45	SignalP-noTM		extr 22, E.R. 3	HSPLLYGASSGPTGSWANSPINIVPTMAYADNEGDLFVAAAGHMALLHNTIIRGFNSIHQQASHVKPQDAADFLSYTRTWLKFLRAHHATEEATLFPVIKDVLEDQSVLGEMHHEHERLHGGLSELDKLIASTDQGAPYDARQLLDILESLRPTLEYHMHHEVSSIAELSRHSNAPARNSAEATAAGDLMATWGKNSISKGGLFDMVPFFLLNTDSTVDDGRWVAWPGMPKPVRWALVNVAGAVHGGWWRFASCNGHGRPRQLYATPVDDEAEAKNAEL	279	none	0.02	cyto_nucl 15, nucl 13.5, cyto 13.5, mito 3	cyto_nucl	Cluster05687	-	-	PF01814|Hemerythrin HHE cation binding domain|5.9E-11;	PTHR38048||6.9E-88;PTHR38048:SF2||6.9E-88;	-	-	-	-	-	-	-	G3DSA:1.20.120.520||1.6E-15;	-	-	-
g4673.t1	Dreco_g4673	MMKLTVGLVAALAGFSSALQPTAQVYIIPAREASAAPPSLSPGLARLVLLQRLAAIGQGPSINDVPNDANTEDAVSAMTRFGKTSPVLFGGENNGEPSQLVMMLDEMTEQQMEDLGRAFDMKPAFTITDPPSSNAHEELVTVDFRIAGITDVNQCSLREIANPLEECWNGKQAAVAKYNANQDPDVLQQLPQRLAQLVQLAKSGELETTILLLPSTSNSKSWSDLPQELRRRQAEQVISSYDKAAASSTSAVPEKPIAFPSKMPIAACFNSKKSCMIATGNCSSHGSCLDRYASAEEDGKKKEACFACHCLSTKSESGKVTHWAGPSCAKADISVAFWLFVGFTVAMVGIVWLAIVMLFNVGEEPLPGVIGAGVSRSK	0.53	19	0.665	19	0.903	10	0.834	0.756	Y	0.45	SignalP-noTM		extr 17, mito 4, cyto 2, golg 2, mito_nucl 2	QPTAQVYIIPAREASAAPPSLSPGLARLVLLQRLAAIGQGPSINDVPNDANTEDAVSAMTRFGKTSPVLFGGENNGEPSQLVMMLDEMTEQQMEDLGRAFDMKPAFTITDPPSSNAHEELVTVDFRIAGITDVNQCSLREIANPLEECWNGKQAAVAKYNANQDPDVLQQLPQRLAQLVQLAKSGELETTILLLPSTSNSKSWSDLPQELRRRQAEQVISSYDKAAASSTSAVPEKPIAFPSKMPIAACFNSKKSCMIATGNCSSHGSCLDRYASAEEDGKKKEACFACHCLSTKSESGKVTHWAGPSCAKADISVAFWLFVGFTVAMVGIVWLAIVMLFNVGEEPLPGVIGAGVSRSK	359	none	0.32	pero 10, plas 6.5, extr_plas 6, cyto 4, mito 4, cyto_mito 4	pero	Cluster07555	O74728|YH93_SCHPO|2e-18	-	PF12955|Domain of unknown function (DUF3844)|1.3E-35;	PTHR36853||6.2E-33;PTHR36853:SF1||6.2E-33;	-	-	-	-	-	-	-	-	-	-	-
g4680.t1	Dreco_g4680	MVSKLVFAVAAAQCVSAHFGISYPAWRADTLTKDTNYSQWTYPCAGVPYGVGNVTEWPLEGAAIKLDLHHTWTYVFVNLGFGENVTNFNVSLTPQFLNATGKGTLCLDKLPLPAGLEDGSLATVQVVTVGNKGSALYNCADVRFKKDAKPVADCNSGNISVVKIQQQTGNATATNATAGSRQAVDSAAGLVNVDTLALGSVVGLASAFVLGLSL	0.392	18	0.491	18	0.743	16	0.613	0.557	Y	0.45	SignalP-noTM		extr 27	FGISYPAWRADTLTKDTNYSQWTYPCAGVPYGVGNVTEWPLEGAAIKLDLHHTWTYVFVNLGFGENVTNFNVSLTPQFLNATGKGTLCLDKLPLPAGLEDGSLATVQVVTVGNKGSALYNCADVRFKKDAKPVADCNSGNISVVKIQQQTGNATATNATAGSRQAVDSAAGLVNVDTLALGSVVGLASAFVLGLSL	196	none	0.02	plas 18, cyto 4, mito 4, cyto_mito 4	plas	Cluster07562	Q4WCX9|YA280_ASPFU|1e-12	-	-	PTHR34992:SF2||2.3E-69;PTHR34992||2.3E-69;	-	-	-	-	-	-	-	-	-	-	-
g4695.t1	Dreco_g4695	MVNLKNIAVAATTLLAYAGAAPFVSETGEFKTSAKTSKVIPGKYIITLKDGLQARDLDSHLDWVNGVHKRGLSASQFKGVERTYNGKHINFRGYAGHFDQATVAEIRKNPDVALVEADQVWELAFIDPAEEVVGIQQKRDLTTQTGAPWGLGTVSHRSKGSTDYVYDTNAGAGTFAYVVDTGIVTTHEEFEGRAEAAFTAFPNDANVDTFGHGTHVAGTIAGKTFGVAKKAKIQAVKVFQGSSSATSIILAGYNWAVEDIIAKGRTGSAAINLSLGGPKSVSFNNVVDAASKKGVLSIIAAGNESQDASRVSPASAESAVTVGALTKDWTMSYFSNWGTVLDIFAPGSDVNSAWIGSNSATKSISGTSMATPHVVGLALTAMSVDGVQGVDAVTKHLTG…	0.249	21	0.399	21	0.795	18	0.643	0.531	Y	0.45	SignalP-noTM		extr 22, cyto 4	PFVSETGEFKTSAKTSKVIPGKYIITLKDGLQARDLDSHLDWVNGVHKRGLSASQFKGVERTYNGKHINFRGYAGHFDQATVAEIRKNPDVALVEADQVWELAFIDPAEEVVGIQQKRDLTTQTGAPWGLGTVSHRSKGSTDYVYDTNAGAGTFAYVVDTGIVTTHEEFEGRAEAAFTAFPNDANVDTFGHGTHVAGTIAGKTFGVAKKAKIQAVKVFQGSSSATSIILAGYNWAVEDIIAKGRTGSAAINLSLGGPKSVSFNNVVDAASKKGVLSIIAAGNESQDASRVSPASAESAVTVGALTKDWTMSYFSNWGTVLDIFAPGSDVNSAWIGSNSATKSISGTSMATPHVVGLALTAMSVDGVQGVDAVTKHLTGHGTKDKITGNIRGSPNVIGNN…	404	none	0.01	cyto 19, cyto_nucl 16.5, nucl 10	cyto	Cluster02543	A1CIA7|ORYZ_ASPCL|1e-129	2117|PHI:2117|SPM1|P58371|148305|Magnaportheoryzae(related:Magnaporthegrisea)|Reducedvirulence|5e-72	PF05922|Peptidase inhibitor I9|4.9E-16;PF00082|Subtilase family|1.4E-33;	PTHR10795:SF420||2.2E-116;PTHR10795:SF420||2.2E-116;PTHR10795||2.2E-116;PTHR10795||2.2E-116;	SSF52743||2.75E-64;SSF54897||6.23E-15;	-	-	PS00137|Serine proteases, subtilase family, histidine active site.|-;PS00138|Serine proteases, subtilase family, serine active site.|-;PS00136|Serine proteases, subtilase family, aspartic acid active site.|-;	-	-	-	G3DSA:3.30.70.80||1.9E-18;G3DSA:3.40.50.200||3.3E-66;	-	-	PR00723|Subtilisin serine protease family (S8) signature|6.3E-16;PR00723|Subtilisin serine protease family (S8) signature|6.3E-16;PR00723|Subtilisin serine protease family (S8) signature|6.3E-16;
g4700.t1	Dreco_g4700	MRFLTILAPLLGLAAAAPNTAAVAPKKVRVRGVSLLGSGCPAGTANVQVDATGSLFEATFSAYEVQTGPGTRASDWRKNCKLTLNMEFDAGYQFTILDTDMIGFAEIPKGARGQCTNTFSFTGSAARHVDYAISLPGKYSGNFNLQSRPGIESWSDCGGSTAILNMNTACNISPTHLPALIAVDHISGKLTVKFAVKWRYCRK	0.664	17	0.792	17	0.96	4	0.943	0.873	Y	0.45	SignalP-noTM		extr 22, mito 4	PNTAAVAPKKVRVRGVSLLGSGCPAGTANVQVDATGSLFEATFSAYEVQTGPGTRASDWRKNCKLTLNMEFDAGYQFTILDTDMIGFAEIPKGARGQCTNTFSFTGSAARHVDYAISLPGKYSGNFNLQSRPGIESWSDCGGSTAILNMNTACNISPTHLPALIAVDHISGKLTVKFAVKWRYCRK	186	none	0.02	cyto 13, cyto_nucl 12.3333, cyto_pero 9.66667, mito 7, nucl 6.5, pero 4.5	cyto	Cluster00763	D4ATM6|A7590_ARTBC|3e-18	-	PF14273|Domain of unknown function (DUF4360)|5.8E-46;	PTHR38847||5.0E-28;PTHR38847:SF3||5.0E-28;	-	-	-	-	-	-	-	-	-	-	-
g4716.t1	Dreco_g4716	MKLSLGVLCTSLLGAEAAAARRPQLTPEAVAADVDWIGLKNVLGNLYTIAKNHGGNRAFGLPGYRFSMDYVLQRVRIRFDKYFHTEVQEFTQLYYQLNEISLAGPEGQDIPVFSMIYNAATPRPHGITAPLINIPVDDDRGSACFADQWNGIDASGKIALIKRGKCSVDAKAKLATAHGALAVIIYSEAGGINYPAYLTAENAGKLVPIGGVGAGVGSNWSQRLAAGEQLKVRLIVDAITEPRRCWNIISETREGDPNNVVLIGTHLDSVPTGPGINDNGSGIAALLEMVNSFRKFTGLKNKIRFAWWGAEEVGLVGSSHYASSLNETEADKIRLYMNFDTIGSRRPNYTVEANDDADRIAAAPLLEHLLLHGGLPAKIVPYSPMSSNYYGFIKLGIPT…	0.401	21	0.531	21	0.886	14	0.696	0.62	Y	0.45	SignalP-noTM		extr 22, cyto 4	RPQLTPEAVAADVDWIGLKNVLGNLYTIAKNHGGNRAFGLPGYRFSMDYVLQRVRIRFDKYFHTEVQEFTQLYYQLNEISLAGPEGQDIPVFSMIYNAATPRPHGITAPLINIPVDDDRGSACFADQWNGIDASGKIALIKRGKCSVDAKAKLATAHGALAVIIYSEAGGINYPAYLTAENAGKLVPIGGVGAGVGSNWSQRLAAGEQLKVRLIVDAITEPRRCWNIISETREGDPNNVVLIGTHLDSVPTGPGINDNGSGIAALLEMVNSFRKFTGLKNKIRFAWWGAEEVGLVGSSHYASSLNETEADKIRLYMNFDTIGSRRPNYTVEANDDADRIAAAPLLEHLLLHGGLPAKIVPYSPMSSNYYGFIKLGIPTTGITAGTMFPLDNPPDPCFHE…	454	none	0.01	cysk 31	cysk	Cluster00271	P96264|LPQL_MYCTU|1e-53	-	PF02225|PA domain|4.3E-11;PF04389|Peptidase family M28|7.5E-37;	PTHR12147||2.8E-78;PTHR12147:SF19||2.8E-78;	SSF53187||2.73E-49;SSF52025||1.03E-13;	-	-	-	-	-	-	G3DSA:3.40.630.10||2.2E-53;G3DSA:3.40.630.10||2.2E-53;G3DSA:3.50.30.30||3.7E-19;	-	-	-
g4749.t1	Dreco_g4749	MAAMRLMLAALLLTSSRFSHAQFIHRYENARNLTVKTYPGNVTVSFKEPRGVCNTASDAQKQYTGWVSVPNEYPTNIFFYFVEARNATDNLTVWINGGPGASSMYGFFTGNGPCEVVERGLDEYETVAREWGWDRASNMLFIDQPVQTGFSYDVPTDGTLYRMKASTVTPPIYNPDTVPSWDLVNGTFSSGNVNNTAGTSQEAALAVWHVIQAFLTTLPELKLPLNASTLEVSLFAESYGGIFAPIFAETWQAQNQNRKRLAGHADGPLPVEIRLASVGIVSGIIDMATEIPAYLRFLNNNTYGIEPLSGEVTESLLRNFTAVGGSQQILAQCAASARQSEAGRATNETEADDICTQGYQSYAEILRAFRRKYGRSWYDIAERFYSPFPSLHFLEYLNQ…	0.853	22	0.849	22	0.929	4	0.843	0.846	Y	0.45	SignalP-noTM		extr 24, mito 2	FIHRYENARNLTVKTYPGNVTVSFKEPRGVCNTASDAQKQYTGWVSVPNEYPTNIFFYFVEARNATDNLTVWINGGPGASSMYGFFTGNGPCEVVERGLDEYETVAREWGWDRASNMLFIDQPVQTGFSYDVPTDGTLYRMKASTVTPPIYNPDTVPSWDLVNGTFSSGNVNNTAGTSQEAALAVWHVIQAFLTTLPELKLPLNASTLEVSLFAESYGGIFAPIFAETWQAQNQNRKRLAGHADGPLPVEIRLASVGIVSGIIDMATEIPAYLRFLNNNTYGIEPLSGEVTESLLRNFTAVGGSQQILAQCAASARQSEAGRATNETEADDICTQGYQSYAEILRAFRRKYGRSWYDIAERFYSPFPSLHFLEYLNQADVLAAIGSPVNFTLTSNAVYD…	597	none	0.22	nucl 13, cyto 12, pero 3, mito 2	nucl	Cluster00403	C5FW30|SPCA_ARTOC|1e-107	901|PHI:901|um01886||5270|Ustilagomaydis|Unaffectedpathogenicity|8e-28	PF00450|Serine carboxypeptidase|5.0E-67;	PTHR11802:SF93||1.3E-152;PTHR11802:SF93||1.3E-152;PTHR11802||1.3E-152;PTHR11802||1.3E-152;	SSF53474||3.71E-78;SSF53474||3.71E-78;	-	-	-	-	-	-	G3DSA:3.40.50.1820||5.7E-94;	-	-	PR00724|Carboxypeptidase C serine protease (S10) family signature|2.7E-7;PR00724|Carboxypeptidase C serine protease (S10) family signature|2.7E-7;PR00724|Carboxypeptidase C serine protease (S10) family signature|2.7E-7;PR00724|Carboxypeptidase C serine protease (S10) family signature|2.7E-7;
g4757.t1	Dreco_g4757	MPSFPANMVPSLLGLVLLLLPLVAALPAHVVPRSGPPIVNAGAKDIIPNKYIAVYNSSFSSDAINAHFTSFSTALKKRNLHKRGLNGVLLSTDVVSFHMAAWHAMAFEADDSTINDVNNADEIAYVEADHWVTTQEAVMQTNSPIGLNRLSHAQAGQKGYVFDSSAGEGVTCYVVDTGVMTEHSEFENRASWGANFVDLINRDEQGHGSHVAGIIAGATFGVAKKAKIVAVKVLDGSGQGQNSNIIRGLQFVANHATQNNLRGRACMNMSLGGSKSPALDAAVEQVAAAGVIPIVAAGNENRDTANISPASAPAAITVGAIDANTDQRAGFSNFGQHVDIYAPGVNILSVGTRSNIDQRVLSGTSMACPHVAGLVAYLITLAAKTSQGAYGNFDMGTLL…	0.816	26	0.885	26	0.989	18	0.956	0.924	Y	0.45	SignalP-noTM		extr 22, cyto 5	PAHVVPRSGPPIVNAGAKDIIPNKYIAVYNSSFSSDAINAHFTSFSTALKKRNLHKRGLNGVLLSTDVVSFHMAAWHAMAFEADDSTINDVNNADEIAYVEADHWVTTQEAVMQTNSPIGLNRLSHAQAGQKGYVFDSSAGEGVTCYVVDTGVMTEHSEFENRASWGANFVDLINRDEQGHGSHVAGIIAGATFGVAKKAKIVAVKVLDGSGQGQNSNIIRGLQFVANHATQNNLRGRACMNMSLGGSKSPALDAAVEQVAAAGVIPIVAAGNENRDTANISPASAPAAITVGAIDANTDQRAGFSNFGQHVDIYAPGVNILSVGTRSNIDQRVLSGTSMACPHVAGLVAYLITLAAKTSQGAYGNFDMGTLLKILASRTGAQVVNNVQGTTSLIANNG…	402	none	0.02	mito 15, cyto 8, cyto_nucl 7, nucl 4, pero 4	mito	Cluster00143	L8FSM5|SUB2_PSED2|8e-69	2117|PHI:2117|SPM1|P58371|148305|Magnaportheoryzae(related:Magnaporthegrisea)|Reducedvirulence|5e-38	PF00082|Subtilase family|2.7E-41;	PTHR10795||3.3E-123;PTHR10795:SF420||3.3E-123;	SSF54897||5.95E-6;SSF52743||1.02E-68;	-	-	PS00138|Serine proteases, subtilase family, serine active site.|-;PS00137|Serine proteases, subtilase family, histidine active site.|-;	-	-	-	G3DSA:3.30.70.80||5.8E-9;G3DSA:3.40.50.200||3.7E-71;	-	-	PR00723|Subtilisin serine protease family (S8) signature|3.3E-18;PR00723|Subtilisin serine protease family (S8) signature|3.3E-18;PR00723|Subtilisin serine protease family (S8) signature|3.3E-18;
g4772.t1	Dreco_g4772	MPLRSSSLPLLAALLLLVCGTLAVTTLDDDDLRNIPSPGGDLDYRNGTLLAPILIPRVPGSEGSRKAQRHFVDFFKTKLPNWELEWQNSTSKTPATGNRDVPFSNLIFRRDPPGAPIGDISRLTLVAHYDSKYEPTGFLGAIDSAAPCAMLLHVARSIEDALKAKWDSDGGYDAMDGANGVQIILLDGEEAFVSWTDDDSLYGARSLAAEWESQAYPPKSTHKTPLHSIDLFVLLDLLGSTNPRVPSYFLTTHWAYKNMAGIEKRMRALGLLESKSDKPFLPEMEKAHEAFSGWMSISDDHVPFIKRGVNVLHIIPSPFPDVWHKMEDNGENLDGPTTKDWAKIVTAFTAEWLDLKGHMPKKVVTGEKSSVSRSVTSMKTEL	0.84	24	0.899	24	0.987	8	0.96	0.932	Y	0.45	SignalP-noTM		extr 18, golg 5, E.R. 2	TTLDDDDLRNIPSPGGDLDYRNGTLLAPILIPRVPGSEGSRKAQRHFVDFFKTKLPNWELEWQNSTSKTPATGNRDVPFSNLIFRRDPPGAPIGDISRLTLVAHYDSKYEPTGFLGAIDSAAPCAMLLHVARSIEDALKAKWDSDGGYDAMDGANGVQIILLDGEEAFVSWTDDDSLYGARSLAAEWESQAYPPKSTHKTPLHSIDLFVLLDLLGSTNPRVPSYFLTTHWAYKNMAGIEKRMRALGLLESKSDKPFLPEMEKAHEAFSGWMSISDDHVPFIKRGVNVLHIIPSPFPDVWHKMEDNGENLDGPTTKDWAKIVTAFTAEWLDLKGHMPKKVVTGEKSSVSRSVTSMKTEL	358	none	0.15	cyto 20.5, cyto_nucl 16, nucl 8.5	cyto	Cluster06144	Q90YA8|QPCT_GLOBL|6e-67	-	PF04389|Peptidase family M28|7.4E-34;	PTHR12283||2.6E-187;PTHR12283:SF2||2.6E-187;	SSF53187||2.68E-37;	-	-	-	-	-	-	G3DSA:3.40.630.10||7.3E-16;	-	-	-
g4773.t1	Dreco_g4773	MRFSTASTLIALAGAVHASASWSFSDGTVTLTSKKADDVTETFSNTEQVRDPLRLGDRDILKVSLTTKVGTTAKRPHQAFLILKESSGLEAPFPFTMKESGEGKVQFGQKDLPVQFVVSNSTLKASIVLGSSGSDQGSLTTVFEVSLARDPAAMSPTYEAPLRYGRLPEIHHIFREDPKNPPKIVSLVFSVAVLATVPALLVGWFHLGANVNHLQNALNGAPVSHILFFASILAMEGVFTMYYCHWKLFQTLPAIVLVTAVALESGKRALGEVQRRRLAGKR	0.367	19	0.53	19	0.853	18	0.767	0.658	Y	0.45	SignalP-noTM		extr 19, E.R. 4, plas 3	ASWSFSDGTVTLTSKKADDVTETFSNTEQVRDPLRLGDRDILKVSLTTKVGTTAKRPHQAFLILKESSGLEAPFPFTMKESGEGKVQFGQKDLPVQFVVSNSTLKASIVLGSSGSDQGSLTTVFEVSLARDPAAMSPTYEAPLRYGRLPEIHHIFREDPKNPPKIVSLVFSVAVLATVPALLVGWFHLGANVNHLQNALNGAPVSHILFFASILAMEGVFTMYYCHWKLFQTLPAIVLVTAVALESGKRALGEVQRRRLAGKR	263	276 - RRLAGKR - 282	0.08	plas 10, cyto 7, extr_plas 7, nucl 4, E.R. 4, cyto_pero 4, cyto_golg 4	plas	Cluster06145	P04844|RPN2_HUMAN|5e-11	-	PF05817|Oligosaccharyltransferase subunit Ribophorin II|1.8E-29;	PTHR12640||2.5E-69;PTHR12640:SF0||2.5E-69;	-	-	-	-	-	-	-	-	-	-	-
g4776.t1	Dreco_g4776	MPSFLCAVLSTVATLASVAQADYSIDPKSVSASIRQAWCQSERATCPIICQQTGPGTTLVNTCDPDLLTYGCLCGDNKRPNVSEYSLTLPYFICQEWGNQCVKACGSNNKCSSDCREKNPCGAQEPKKYTSTAEAPAATSTDANAIYTNLPGGPATMGSSGAAVAVEAGRSYSLAVVLAGLFAGFAML	0.664	22	0.738	22	0.91	12	0.816	0.78	Y	0.45	SignalP-noTM		extr 26	YSIDPKSVSASIRQAWCQSERATCPIICQQTGPGTTLVNTCDPDLLTYGCLCGDNKRPNVSEYSLTLPYFICQEWGNQCVKACGSNNKCSSDCREKNPCGAQEPKKYTSTAEAPAATSTDANAIYTNLPGGPATMGSSGAAVAVEAGRSYSLAVVLAGLFAGFAML	166	none	0.16	cyto 8, plas 6, mito 6, nucl 5, E.R. 5	cyto	Cluster06143	-	-	-	PTHR38118||6.5E-54;PTHR38118:SF2||6.5E-54;	-	-	-	-	-	-	-	-	-	-	-
g4784.t1	Dreco_g4784	MRPLFPSLAALLLAEPVAAVHLTGYDFIVVGSGAGGGPLAARLALAGHKTLLLEAGDDQGGSTNYSVPAYSARSSEDEALAWNFFVRHYADDERQARDFKTSYRTSDGGLYTGLNPPRGAEMLGTLYPRTGTLGGCTAHNALVAVYPHRSDFEYMAALTGDASWAPDKMRKYFVRIERNRYLLPGAKGHGYDGWLGTQTAPLTIPLQDPQLLSLVSGGAFALGNLSEAVSNLGTVLLGDANADSARRDAEGGYFQTPISTDGGRRVGSREFVVAVRDAKKKDGTKKYPLDVRLNCHVTKVVVDESGDEPRATGVEFLDGAYLYRASPRARSGGKGVAGSASARLEVIVAGGSYNSPQLLKLSGIGPKEELARFGIRLVKDLPGVGSNLQDHYEVAVQGR…	0.813	20	0.826	20	0.907	4	0.838	0.832	Y	0.45	SignalP-noTM		extr 24, mito 2	HLTGYDFIVVGSGAGGGPLAARLALAGHKTLLLEAGDDQGGSTNYSVPAYSARSSEDEALAWNFFVRHYADDERQARDFKTSYRTSDGGLYTGLNPPRGAEMLGTLYPRTGTLGGCTAHNALVAVYPHRSDFEYMAALTGDASWAPDKMRKYFVRIERNRYLLPGAKGHGYDGWLGTQTAPLTIPLQDPQLLSLVSGGAFALGNLSEAVSNLGTVLLGDANADSARRDAEGGYFQTPISTDGGRRVGSREFVVAVRDAKKKDGTKKYPLDVRLNCHVTKVVVDESGDEPRATGVEFLDGAYLYRASPRARSGGKGVAGSASARLEVIVAGGSYNSPQLLKLSGIGPKEELARFGIRLVKDLPGVGSNLQDHYEVAVQGRAPAPFASVADCTFRDDPDED…	622	none	0.08	nucl 16.5, cyto_nucl 16, cyto 14.5	nucl	Cluster00132	Q985M5|BETA_RHILO|1e-40	922|PHI:922|um03615||5270|Ustilagomaydis|Unaffectedpathogenicity|2e-16	PF05199|GMC oxidoreductase|9.7E-32;PF00732|GMC oxidoreductase|7.4E-28;PF00890|FAD binding domain|1.3E-4;	PTHR11552||0.0;PTHR11552||0.0;PTHR11552:SF100||0.0;PTHR11552:SF100||0.0;	SSF51905||6.6E-61;SSF51905||6.6E-61;SSF51905||6.6E-61;SSF51905||6.6E-61;SSF54373||4.22E-23;	-	-	PS00624|GMC oxidoreductases signature 2.|-;	-	-	-	G3DSA:3.50.50.60||8.5E-89;G3DSA:3.50.50.60||8.5E-89;G3DSA:3.50.50.60||8.5E-89;G3DSA:3.50.50.60||8.5E-89;	-	PIRSF000137||3.6E-145;	-
g4796.t1	Dreco_g4796	MATDDACCRWLSRPRWPSRVLSLLTTAFGLARTDSTDRPPTPEPHCLAIPSTGALRWPPCYPHLLLTLHVQLLLAACRCPTAYTLAMIQVDGPTGAISGSHIPEAHHGYGYDALLVHGNPSAFVCPTPCAVVQYVRATTDLGRINSCRVLNPRSRNHGLVYLTLSTAVRIPHTFC	0.231	34	0.375	34	0.78	29	0.584	0.488	Y	0.45	SignalP-noTM		extr 12, mito 10, cyto 4	STDRPPTPEPHCLAIPSTGALRWPPCYPHLLLTLHVQLLLAACRCPTAYTLAMIQVDGPTGAISGSHIPEAHHGYGYDALLVHGNPSAFVCPTPCAVVQYVRATTDLGRINSCRVLNPRSRNHGLVYLTLSTAVRIPHTFC	141	none	0.07	extr 21, cyto_nucl 5.5, cyto 5, nucl 4	extr		-	-	-	-	-	-	-	-	-	-	-	-	-	-	-
g4813.t1	Dreco_g4813	MGLSSAFLLLALAALTPFLYERSQVLVMFYNNAPERLVKINTFKSHSVKFADRIRSCEDVLLLEDEGIAVLACDPGRERWNTVMGVFAPGPVAAAGLYVYDYKVAADEGALRSIELVNFTTAADFHTLGMAYDKTTSTLYVSNHAKAGPRIETFKLSIGELTATHTRTIQHTLINGPNAIALINSDDFYVSNDHYFTATWSKALSKVETYLALPLGTVVHVKTHGGETRASVVARLPFANGIEILNSTTVAVASTSGSVVNLYDARRDGSLTYRSRIRVPFLPDNMSLSGGKLLIAGHPHPPALTKFTETRRICNDPDALEEASSEMKEYCAVGNALSAVAEWSESTGLRMLYLDTLYPTSATAVRDVNRGVGIVSGLYAKGVLVWRN	0.176	22	0.4	22	0.969	11	0.904	0.672	Y	0.45	SignalP-noTM		extr 21, E.R. 4	SQVLVMFYNNAPERLVKINTFKSHSVKFADRIRSCEDVLLLEDEGIAVLACDPGRERWNTVMGVFAPGPVAAAGLYVYDYKVAADEGALRSIELVNFTTAADFHTLGMAYDKTTSTLYVSNHAKAGPRIETFKLSIGELTATHTRTIQHTLINGPNAIALINSDDFYVSNDHYFTATWSKALSKVETYLALPLGTVVHVKTHGGETRASVVARLPFANGIEILNSTTVAVASTSGSVVNLYDARRDGSLTYRSRIRVPFLPDNMSLSGGKLLIAGHPHPPALTKFTETRRICNDPDALEEASSEMKEYCAVGNALSAVAEWSESTGLRMLYLDTLYPTSATAVRDVNRGVGIVSGLYAKGVLVWRN	366	none	0	cyto 14, cyto_nucl 13.5, nucl 9, extr 3, pero 3	cyto	Cluster02446	Q62086|PON2_MOUSE|2e-11	-	PF01731|Arylesterase|2.3E-5;	PTHR11799||2.4E-85;PTHR11799:SF2||2.4E-85;	SSF63829||6.21E-18;	-	-	-	-	-	-	G3DSA:2.120.10.30||7.7E-52;	-	-	-
g4814.t1	Dreco_g4814	MRSHRTFALVALVVAATVSAAPTLTVRQDASKTVPHTGVTHSVVAGLAGLRFDPDNVVAEIGDVIEWHFLPRNHSIAQSNFGNPCQPLADGASFFAGFNFFTQQGQAPDVFQIVVEDKKTIWYYCPQQGGSHCQNGMVGVINQNFDNQRFSLARHKELAAMTGVSVIPPVVQGGKVIRNPNPNGGF	0.662	21	0.781	21	0.965	6	0.924	0.858	Y	0.45	SignalP-noTM		extr 26	PTLTVRQDASKTVPHTGVTHSVVAGLAGLRFDPDNVVAEIGDVIEWHFLPRNHSIAQSNFGNPCQPLADGASFFAGFNFFTQQGQAPDVFQIVVEDKKTIWYYCPQQGGSHCQNGMVGVINQNFDNQRFSLARHKELAAMTGVSVIPPVVQGGKVIRNPNPNGGF	165	none	0.05	cyto 16, cyto_nucl 13, mito 8, nucl 4, E.R._mito 4	cyto	Cluster03051	D4B3I5|A3024_ARTBC|2e-15	-	-	PTHR34883:SF3||1.7E-35;PTHR34883||1.7E-35;	SSF49503||1.42E-17;	-	-	-	-	-	-	G3DSA:2.60.40.420||7.1E-12;	-	-	-
g4815.t1	Dreco_g4815	MIVQNVLTLVAFTALSQQALAFNPYRYVLRHAADKRAVRIVTEWETKHVIVHQGAVTPATQAVADGSSANVAQATLTASYASAVALSSSSTSAAAAATQNPYRNGTSSVGGANNSSMPFPSKRGLAYNDVSMANLLGASCPTCSWAYDWAASTTGLSSNLNYVPMLWGDQSDRASTWDSNAEKAIASGSKALFSFNEPDHTGQANLSPQQAAASHTKYMNKYAGRILIGAPAITNSGNANEGIQWLQNFVSVCNSQSEKCHYDFCNVHWYSEAEYASTLFDHLEAANKACGGKPIWLTEFAPTAGDTEGFLRSVVPKLDALGYLHAYSYFMVKTGSLMSSANSISSLGKLYASI	0.865	22	0.758	22	0.82	8	0.66	0.705	Y	0.45	SignalP-noTM		extr 24, nucl 1, mito 1, cyto 1, cyto_nucl 1, cyto_mito 1, mito_nucl 1	NPYRYVLRHAADKRAVRIVTEWETKHVIVHQGAVTPATQAVADGSSANVAQATLTASYASAVALSSSSTSAAAAATQNPYRNGTSSVGGANNSSMPFPSKRGLAYNDVSMANLLGASCPTCSWAYDWAASTTGLSSNLNYVPMLWGDQSDRASTWDSNAEKAIASGSKALFSFNEPDHTGQANLSPQQAAASHTKYMNKYAGRILIGAPAITNSGNANEGIQWLQNFVSVCNSQSEKCHYDFCNVHWYSEAEYASTLFDHLEAANKACGGKPIWLTEFAPTAGDTEGFLRSVVPKLDALGYLHAYSYFMVKTGSLMSSANSISSLGKLYASI	332	none	0.15	mito 22, cyto_pero 3.5, nucl 3, cyto 3, pero 2	mito	Cluster00802	Q09788|ASL1_SCHPO|2e-11	-	PF11790|Glycosyl hydrolase catalytic core|1.1E-52;	PTHR34154:SF3||5.7E-62;PTHR34154||5.7E-62;	SSF51445||6.6E-17;	-	-	-	-	-	-	G3DSA:3.20.20.80||1.2E-10;	-	-	-
g4843.t1	Dreco_g4843	MLSFALTLALLLGANAVPAPFRANPLAGQVQPLTNEQDRDDSTELLNSETFDSRAICLDQPKDHQEFLSTLGIRQTLSSQILGCYPDLNQLIHTVSGPTPVSGTASASKGHAYGDPEKKYQNPQVCATNINKWACMHGLACNLNAGIPTCYPSSTSQGNDGQYFDMLKMRVKLGSDIRAGTGTRIYAYFGNSTDSLQLDELFDTPWFGDQAEINVDLNRVFRSKVVSLDLLRHVNIVHQSGHDEYQVRDISLEIRDAHTHIHFKNSRWENLNLWLPLGDEEAEDPRPHLKVAWHGDIKKDDWQPTPPSSMTSLSPAPAPNRRFKNCYFSPIQCWFQE	0.614	17	0.762	17	0.97	9	0.941	0.859	Y	0.45	SignalP-noTM		extr 24, mito 1, golg 1, vacu 1	PAPFRANPLAGQVQPLTNEQDRDDSTELLNSETFDSRAICLDQPKDHQEFLSTLGIRQTLSSQILGCYPDLNQLIHTVSGPTPVSGTASASKGHAYGDPEKKYQNPQVCATNINKWACMHGLACNLNAGIPTCYPSSTSQGNDGQYFDMLKMRVKLGSDIRAGTGTRIYAYFGNSTDSLQLDELFDTPWFGDQAEINVDLNRVFRSKVVSLDLLRHVNIVHQSGHDEYQVRDISLEIRDAHTHIHFKNSRWENLNLWLPLGDEEAEDPRPHLKVAWHGDIKKDDWQPTPPSSMTSLSPAPAPNRRFKNCYFSPIQCWFQE	320	none	0.38	cyto_nucl 17, nucl 16, cyto 10, extr 5	cyto_nucl		-	-	-	-	-	-	-	-	-	-	-	-	-	-	-
g4891.t1	Dreco_g4891	MKPLSVASAIFGLLATSATVSASLSTSSKIQLPSDFLPPQVFKNANLVHIISLKKNYVKEQVNVLVENVSNEPQDEYYLPFTADQMSRVGGFEVNDRKDDNAGPFVVEEVEYDPSSDMQYYRIQLPAPLKPGSQQTLGISFYYLKAYTPLPASISQNDVQFLVYDFSLIASSAYPTTKQKTEVKAPSSNIPDYTAITGEKASEKFPVVQGSKLIYGPFTEKSPGDVFPAQVRVEFSKPVTHVSNLERDIEVSHWGGNVAFEERYTMYHRGANLSKPFNRVDWAQARHAGTPTSALQDIRVPLQVGSIDPYFTDVIGNVSTSRFRSNKREALLELQTRYPIYGGWKYPFTIGWNSNAASLVRRTPSGGYVLKVPFLEGPRQVEGVEYERINIRVLLPEGA…	0.478	23	0.611	23	0.895	15	0.781	0.702	Y	0.45	SignalP-noTM		extr 18, mito 3, cyto 3, cyto_mito 3	LSTSSKIQLPSDFLPPQVFKNANLVHIISLKKNYVKEQVNVLVENVSNEPQDEYYLPFTADQMSRVGGFEVNDRKDDNAGPFVVEEVEYDPSSDMQYYRIQLPAPLKPGSQQTLGISFYYLKAYTPLPASISQNDVQFLVYDFSLIASSAYPTTKQKTEVKAPSSNIPDYTAITGEKASEKFPVVQGSKLIYGPFTEKSPGDVFPAQVRVEFSKPVTHVSNLERDIEVSHWGGNVAFEERYTMYHRGANLSKPFNRVDWAQARHAGTPTSALQDIRVPLQVGSIDPYFTDVIGNVSTSRFRSNKREALLELQTRYPIYGGWKYPFTIGWNSNAASLVRRTPSGGYVLKVPFLEGPRQVEGVEYERINIRVLLPEGATNVKAFTGVPESAITEYSVGVHK…	466	none	0.08	cyto 17.5, cyto_nucl 9.5, pero 7, mito 4, E.R._mito 3.5	cyto	Cluster05407	Q9ZUA0|OST1B_ARATH|5e-44	-	PF04597|Ribophorin I|1.7E-143;	PTHR21049||8.0E-142;	-	-	-	-	-	-	-	-	-	-	-
g4897.t1	Dreco_g4897	MRFSTVILSGALAAAASAQTTVGETPAQASATACLNACGPSDVKCQAHCIVVPSPNESQAETTNNCVAACSQGNGSPADTQRYSDCTQKCIGDYFFHPAQGTPNDKSAGNGAGTNAGNGAGTNAGNGAGTNAGTTAGANAGTNAGTNAGANGSGSTATLSGSATATSTHTASAVSSGLAPIATAAPAAILGLVAAVLAL	0.524	19	0.661	19	0.906	13	0.83	0.752	Y	0.45	SignalP-noTM		extr 27	TTVGETPAQASATACLNACGPSDVKCQAHCIVVPSPNESQAETTNNCVAACSQGNGSPADTQRYSDCTQKCIGDYFFHPAQGTPNDKSAGNGAGTNAGNGAGTNAGNGAGTNAGTTAGANAGTNAGTNAGANGSGSTATLSGSATATSTHTASAVSSGLAPIATAAPAAILGLVAAVLAL	180	none	0.06	plas 16, extr 5, mito 5, cyto 4	plas	Cluster06175	-	-	-	-	-	-	-	-	-	-	-	-	-	-	-
g4908.t1	Dreco_g4908	MQFLAIVIASLASIAAANPTPNSPPSSCKPGTYECAVNSKTGQPGWNVCNTSSQWVYGGDCPPHTICKFNPVNQSPYCVPPSFMTE	0.646	18	0.755	18	0.948	9	0.886	0.826	Y	0.45	SignalP-noTM		extr 27	PTPNSPPSSCKPGTYECAVNSKTGQPGWNVCNTSSQWVYGGDCPPHTICKFNPVNQSPYCVPPSFMTE	68	none	0.04	extr 20, nucl 10, extr_plas 10	extr		-	-	-	-	-	-	-	-	-	-	-	-	-	-	-
g4933.t1	Dreco_g4933	MIPSIRSAALALFVAMAGVQAQTIPQSTANETSGGGRACNNSPELCGKQYNAITYMGAHGASFLRDGSTGNSVSGNQFQNATAALDAGLRLLQVQVHKSGSTLKLCHTSCSLLDAGSLESWLSVVNGWLSNNPNEVITLVLVNSDEAPASDFGPVFETSGIAKVSYNPGTSKATSNWPTLESMIGQGTRVVSFVTNMPFSSSTPYLLPEFDFIFETPFEVSDMSGFNCTVDRPTRARPVATALSKNYMSLVNHFKYQDVTSSIQVPDVDRIETINSPDTSAEGNLGKHLQQCATEWNKQPNFVLVDFWDKANPLQAADNLNRVSSPVSRKSTTSTPSTGGATNAGKGEYGALVSLLTAATLLLL	0.847	22	0.857	22	0.902	3	0.866	0.862	Y	0.45	SignalP-noTM		extr 26	TIPQSTANETSGGGRACNNSPELCGKQYNAITYMGAHGASFLRDGSTGNSVSGNQFQNATAALDAGLRLLQVQVHKSGSTLKLCHTSCSLLDAGSLESWLSVVNGWLSNNPNEVITLVLVNSDEAPASDFGPVFETSGIAKVSYNPGTSKATSNWPTLESMIGQGTRVVSFVTNMPFSSSTPYLLPEFDFIFETPFEVSDMSGFNCTVDRPTRARPVATALSKNYMSLVNHFKYQDVTSSIQVPDVDRIETINSPDTSAEGNLGKHLQQCATEWNKQPNFVLVDFWDKANPLQAADNLNRVSSPVSRKSTTSTPSTGGATNAGKGEYGALVSLLTAATLLLL	342	none	0.14	nucl 18, cyto_nucl 13.5, cyto 7, extr 5	nucl	Cluster06046	D4AK17|PLCX1_ARTBC|7e-54	-	-	PTHR13593:SF45||1.1E-116;PTHR13593||1.1E-116;	SSF51695||8.37E-40;	-	-	-	-	-	-	G3DSA:3.20.20.190||1.6E-14;	-	-	-
g4954.t1	Dreco_g4954	MRGDIVPLVFSLTLPFLAAARSKNAILLSEVQSLTLRGHGAQTTHRRLSAVPQLKCISQKDICALYDIDVMRCTNQGSSYGSEDIEWSCTANLPVELKLGSTDVVCEGYSSPNDPYVLKGSCGVEYRLLLTERGEASYPHIANPHGGLFSDGEGGTDLSAWLFAAIFVAVLGWIIYSACYANNHAPRRVNRRYGGGWGGGGGWGGGGDDDGDPPPPYSKPYSAGQSRWTPGFWTGLAGGAAAGYMAGNRSRDNGRERTDYGGNGWGSRQIPSSSGPSASGTRHESTGFGSTRRR	0.312	20	0.444	20	0.801	18	0.614	0.536	Y	0.45	SignalP-noTM		extr 21, plas 3, mito 2	RSKNAILLSEVQSLTLRGHGAQTTHRRLSAVPQLKCISQKDICALYDIDVMRCTNQGSSYGSEDIEWSCTANLPVELKLGSTDVVCEGYSSPNDPYVLKGSCGVEYRLLLTERGEASYPHIANPHGGLFSDGEGGTDLSAWLFAAIFVAVLGWIIYSACYANNHAPRRVNRRYGGGWGGGGGWGGGGDDDGDPPPPYSKPYSAGQSRWTPGFWTGLAGGAAAGYMAGNRSRDNGRERTDYGGNGWGSRQIPSSSGPSASGTRHESTGFGSTRRR	274	none	0.2	extr 19.5, extr_plas 11.5, mito 9	extr	Cluster06058	F1QPC3|SARAF_DANRE|5e-24	-	PF06682|SOCE-associated regulatory factor of calcium homoeostasis|2.0E-96;	PTHR15929||2.0E-75;	-	-	-	-	-	-	-	-	-	-	-
g4964.t1	Dreco_g4964	MRHWKFLLPCLVAVTLAADDNEASSTPAPVMQGADLPSTSQDHDMDLRGTQYHRVDLRATGITFWEEITWGFPFGRRLARANLPMGPRGKLAFSNALIVALYQRGIRQIIVDDPKALDAETIAAFELNGINVVVVDPEDLDWRGLHGDLFTAFRAHPDATLILESGRFPGWVAGVVQTQSMRATDTLPPLEFIYFWRNGVNSTIVASNLLEFALFTVSDEYTVPGDVPHPPLSRTQSEEDGEIWCESLQPSRPRPPTTEAPTAPPSPGSGCLPLGCLAVVSWIRHRGNPPHDKRSEPVTLPPTAEQNKTCEREMNLATRPRRTCDRLELVKIGIKLAPGFLEGTWDCLGLSLPGLVGPYPQKIAWKPDSGTDNWATLDLVRWLGPGTASIAIDKISRVN…	0.596	18	0.732	18	0.943	12	0.911	0.829	Y	0.45	SignalP-noTM		extr 15, cyto 5.5, cyto_nucl 3.5, pero 3, mito 2	DDNEASSTPAPVMQGADLPSTSQDHDMDLRGTQYHRVDLRATGITFWEEITWGFPFGRRLARANLPMGPRGKLAFSNALIVALYQRGIRQIIVDDPKALDAETIAAFELNGINVVVVDPEDLDWRGLHGDLFTAFRAHPDATLILESGRFPGWVAGVVQTQSMRATDTLPPLEFIYFWRNGVNSTIVASNLLEFALFTVSDEYTVPGDVPHPPLSRTQSEEDGEIWCESLQPSRPRPPTTEAPTAPPSPGSGCLPLGCLAVVSWIRHRGNPPHDKRSEPVTLPPTAEQNKTCEREMNLATRPRRTCDRLELVKIGIKLAPGFLEGTWDCLGLSLPGLVGPYPQKIAWKPDSGTDNWATLDLVRWLGPGTASIAIDKISRVNLTVENCGDFFGIHNDAFK…	597	none	0.12	nucl 14, cyto_nucl 14, cyto 10, extr 6	nucl	Cluster02646	-	-	-	-	-	-	-	-	-	-	-	-	-	-	-
g4971.t1	Dreco_g4971	MLFNAVVLVLSGLPLLASSAPVSESRPIDYDAIIVGGGPAGLSALSGLARVRRNTLLIDSGVYRNDKTRHMHDVLGFDGVTPAYFRAAAREQLSHYKTVSATNGTVTKVSPMANNTYFEVTSESADGRSRVLTARKVVLATGLRDILPSTPGLDANWGQGIYWCPWCDGHEHADQELGLIAGLEDIPGLVREVLTLNRNITAFVNGTDTAETRAATELKSPRWQEYLRLHRVTIDNRIISSIERLANGTTGHEDPRLPTAPELDRFRVHFASGPPVERSAFLTSFKSKQASTVGEEMGVTLYGGRLAADQSKGLATNIFGVYAIGDANSDNVTNVPHALFSGKRTAVYLHVQLERENAARELANLPAGNNVTKRSIDVEARSVWNIMNGPSDDMLHAGE…	0.629	20	0.759	20	0.969	11	0.916	0.844	Y	0.45	SignalP-noTM		extr 25	PVSESRPIDYDAIIVGGGPAGLSALSGLARVRRNTLLIDSGVYRNDKTRHMHDVLGFDGVTPAYFRAAAREQLSHYKTVSATNGTVTKVSPMANNTYFEVTSESADGRSRVLTARKVVLATGLRDILPSTPGLDANWGQGIYWCPWCDGHEHADQELGLIAGLEDIPGLVREVLTLNRNITAFVNGTDTAETRAATELKSPRWQEYLRLHRVTIDNRIISSIERLANGTTGHEDPRLPTAPELDRFRVHFASGPPVERSAFLTSFKSKQASTVGEEMGVTLYGGRLAADQSKGLATNIFGVYAIGDANSDNVTNVPHALFSGKRTAVYLHVQLERENAARELANLPAGNNVTKRSIDVEARSVWNIMNGPSDDMLHAGEFDQPSIRRDQLIPQ	393	none	0.14	cysk 19, cyto 6.5, cyto_nucl 6, nucl 4.5	cysk	Cluster00511	D4APQ6|TRXR_ARTBC|1e-89	-	PF07992|Pyridine nucleotide-disulphide oxidoreductase|3.4E-11;	PTHR22912||2.2E-102;PTHR22912||2.2E-102;PTHR22912:SF169||2.2E-102;PTHR22912:SF169||2.2E-102;	SSF51905||2.94E-25;SSF51905||2.94E-25;	-	-	-	-	-	-	G3DSA:3.50.50.60||1.2E-28;G3DSA:3.50.50.60||1.2E-28;G3DSA:3.50.50.60||1.3E-27;	-	-	PR00469|Pyridine nucleotide disulphide reductase class-II signature|2.1E-14;PR00469|Pyridine nucleotide disulphide reductase class-II signature|2.1E-14;PR00469|Pyridine nucleotide disulphide reductase class-II signature|2.1E-14;PR00469|Pyridine nucleotide disulphide reductase class-II signature|2.1E-14;PR00368|FAD-dependent pyridine nucleotide reductase signature|3.9E-10;PR00368|FAD-dependent pyr…
g4992.t1	Dreco_g4992	MAPSVLGLALGLIASLPLALAGFDSVSKKNIAVYWGQNSYGQGHGPHIQQNLAYYCASMEINIIPVAFMNGITPPITNFASAGDRCSTFPNNPNLLRCPEIENDIKTCQSKHGKTVVLSLGGATYSQGGWSSAAEAEKAAQNVWAMFGPVNSAAGVDRPFGSAVVDGFDFDFEAYTNHLPVFAATLRALMDGAGGKKYYLTAAPQCVFPDAAVGATLEAVPFDMVNIQFYNNWCGVANFQPGASTQFAFNFDVWDRWAKGSKNPNVKTLLGIPANTGAGGGYTDGAKLRAAIQYSKEHSSFGGVMMWDMSQLYANRGFLDEVVTGLA	0.661	22	0.783	22	0.964	14	0.928	0.861	Y	0.45	SignalP-noTM		extr 24, mito 1, plas 1, E.R. 1	FDSVSKKNIAVYWGQNSYGQGHGPHIQQNLAYYCASMEINIIPVAFMNGITPPITNFASAGDRCSTFPNNPNLLRCPEIENDIKTCQSKHGKTVVLSLGGATYSQGGWSSAAEAEKAAQNVWAMFGPVNSAAGVDRPFGSAVVDGFDFDFEAYTNHLPVFAATLRALMDGAGGKKYYLTAAPQCVFPDAAVGATLEAVPFDMVNIQFYNNWCGVANFQPGASTQFAFNFDVWDRWAKGSKNPNVKTLLGIPANTGAGGGYTDGAKLRAAIQYSKEHSSFGGVMMWDMSQLYANRGFLDEVVTGLA	305	none	0.03	cyto 13.5, cyto_nucl 13.5, nucl 8.5, extr 6	cyto	Cluster02858	Q12713|CHI33_TRIHA|1e-138	2388|PHI:2388|Chi2|0|5530|Metarhiziumanisopliae|Mixedoutcome|9e-32	PF00704|Glycosyl hydrolases family 18|7.2E-21;	PTHR11177||1.3E-101;PTHR11177:SF185||1.3E-101;	SSF51445||1.77E-72;	-	-	PS01095|Chitinases family 18 active site.|-;	-	-	-	G3DSA:3.20.20.80||6.2E-104;	-	-	-
g5020.t1	Dreco_g5020	MSPSRRLLASCVLGLAFTVPSARSSNDDSQAPLGRHSDACPDYASYAAYSHQPLSTGPLALPFQRPDPRCRTFKSDEIERVIKEMTSRMKNPDLARLFENTFPSTTDTTVKFHTKGHDTGTVPATSSRFLWDEGAWQGPQSFIITGDIVAEWLRDSTNQLRPYQALAKKDPAIFDLLLGAINTQSEYVIESPYCNAFQPPPISNLSGTSNGQDDVVHPMYEPSSVFECKYELDSLAHFLALANDFYEHTGSTTFLNDRWFLALAGLVEVLEQQSRPTFDPESGRQSRNHYTFQRWTNTGTETLNLQGIGNPLNGGTGLVRSAFRPSDDATILGFFIPANAMMSVELHRTSKLLKAVGKESSSEALQKWSEKLRAGIMEHGVVKHKKYGDVFAYEVDGYG…	0.572	25	0.634	25	0.839	12	0.71	0.675	Y	0.45	SignalP-noTM		extr 15, mito 4, cyto 3, nucl 1, plas 1, pero 1, golg 1, vacu 1	NDDSQAPLGRHSDACPDYASYAAYSHQPLSTGPLALPFQRPDPRCRTFKSDEIERVIKEMTSRMKNPDLARLFENTFPSTTDTTVKFHTKGHDTGTVPATSSRFLWDEGAWQGPQSFIITGDIVAEWLRDSTNQLRPYQALAKKDPAIFDLLLGAINTQSEYVIESPYCNAFQPPPISNLSGTSNGQDDVVHPMYEPSSVFECKYELDSLAHFLALANDFYEHTGSTTFLNDRWFLALAGLVEVLEQQSRPTFDPESGRQSRNHYTFQRWTNTGTETLNLQGIGNPLNGGTGLVRSAFRPSDDATILGFFIPANAMMSVELHRTSKLLKAVGKESSSEALQKWSEKLRAGIMEHGVVKHKKYGDVFAYEVDGYGSSILMDDANYPSLLALPVMGFCDVT…	521	none	0.43	nucl 23.5, cyto_nucl 15.5, cyto 4.5	nucl	Cluster00995	Q10449|MU157_SCHPO|0	785|PHI:785|MGG_04128|EDJ99431|318829|Magnaportheoryzae|Reducedvirulence|0.0	PF06824|Protein of unknown function (DUF1237)|1.9E-178;	PTHR31047:SF0||4.3E-291;PTHR31047||4.3E-291;	SSF48208||1.25E-167;	-	-	-	-	-	-	G3DSA:1.50.10.10||1.1E-178;	-	PIRSF028846||1.2E-134;	-
g5022.t1	Dreco_g5022	MVRVAHVVSLAAVASTAQAYSGCADAVPGAYIFEFFKDSHGLDSFYEHVGRVGSLRMNLTFELFNGASVQIFDKDDPYSIATKMAENPNVQAFYPICRFQSADPKAKWTGSNPPRDWENRLTKRARANETEDTFSTHIMTQVSMLRAKGWTGKGIKIAILDTGVDYTHPALGGGFGDGYRVSFGYDVIGNAYEPGGIPVPDKDPIDTCDGHGTHVAGIIAAQDTKFGFTGVAPGATLGAYRVVDCNGSTTSDMMIAGFNMAYQNGANIITASLGFHFGWSSDPIALTVQRIVEKGVPCTISQGNMGSLGLFAVATPASGKGVTSVASFENIITPALLSEVTYNIDGGKDIVSIGFEHTATRAWNETTLQVYATSLNTTVEDDACHPLPDTTPDLSNKVV…	0.397	20	0.514	20	0.836	10	0.683	0.605	Y	0.45	SignalP-noTM		extr 26	SGCADAVPGAYIFEFFKDSHGLDSFYEHVGRVGSLRMNLTFELFNGASVQIFDKDDPYSIATKMAENPNVQAFYPICRFQSADPKAKWTGSNPPRDWENRLTKRARANETEDTFSTHIMTQVSMLRAKGWTGKGIKIAILDTGVDYTHPALGGGFGDGYRVSFGYDVIGNAYEPGGIPVPDKDPIDTCDGHGTHVAGIIAAQDTKFGFTGVAPGATLGAYRVVDCNGSTTSDMMIAGFNMAYQNGANIITASLGFHFGWSSDPIALTVQRIVEKGVPCTISQGNMGSLGLFAVATPASGKGVTSVASFENIITPALLSEVTYNIDGGKDIVSIGFEHTATRAWNETTLQVYATSLNTTVEDDACHPLPDTTPDLSNKVVLIRRGPACQFEAKISNAAAK…	889	none	0.07	cyto 13.5, cyto_nucl 10.5, nucl 6.5, E.R. 6, pero 3.5, mito_pero 2.5	cyto	Cluster00057	P29141|SUBV_BACSU|1e-43	3662|PspB(notPD0218)|PHI:3662|Q87ET0|2371|Xylellafastidiosa|Increasedvirulence(Hypervirulence)|1e-06	PF06280|Fn3-like domain|1.7E-17;PF00082|Subtilase family|1.6E-46;PF02225|PA domain|1.4E-8;	PTHR10795:SF401||7.4E-81;PTHR10795:SF401||7.4E-81;PTHR10795||7.4E-81;PTHR10795||7.4E-81;	SSF52025||8.11E-5;SSF52743||2.36E-66;SSF52743||2.36E-66;	-	-	PS00137|Serine proteases, subtilase family, histidine active site.|-;PS00136|Serine proteases, subtilase family, aspartic acid active site.|-;PS00138|Serine proteases, subtilase family, serine active site.|-;	-	-	-	G3DSA:3.50.30.30||4.8E-12;G3DSA:3.40.50.200||1.2E-71;G3DSA:3.40.50.200||1.2E-71;	-	-	PR00723|Subtilisin serine protease family (S8) signature|6.7E-20;PR00723|Subtilisin serine protease family (S8) signature|6.7E-20;PR00723|Subtilisin serine protease family (S8) signature|6.7E-20;
g5040.t1	Dreco_g5040	MFLRILFVALARVALSAPQGGTSVEVTINMNSHFGTSEDTISVLEAATKKVIASSCSRSLSGGSFEGHPISANFDQHGQGNITIGAKTYTIHEDPKISGGMTCDRMYTSQELYITCDVSVPSDVAAGHKLNRRDTNCLKLAKRNGNGVPGLADIAAGHMNGVRNVQLGKRAGPRETEMQAHNASRDATSAAARAGAKTLDARIIPGCSAWELTTDKIGNGDPHQNYNAKQLSRKISCFGAKSCSVSENQSKSYTLTWSASSDVVKWISAGFSVSETWTTGSAHTCGGGRGDTVCIWYQTAFTAYTVQNRNVNFQCQKSMPLGGPKIIWSPNTNNVGGLGYYCVSGARFCHDQGSNYWTYDGPAGGPREREVCSTC	0.429	17	0.634	17	0.958	9	0.929	0.793	Y	0.45	SignalP-noTM		extr 27	PQGGTSVEVTINMNSHFGTSEDTISVLEAATKKVIASSCSRSLSGGSFEGHPISANFDQHGQGNITIGAKTYTIHEDPKISGGMTCDRMYTSQELYITCDVSVPSDVAAGHKLNRRDTNCLKLAKRNGNGVPGLADIAAGHMNGVRNVQLGKRAGPRETEMQAHNASRDATSAAARAGAKTLDARIIPGCSAWELTTDKIGNGDPHQNYNAKQLSRKISCFGAKSCSVSENQSKSYTLTWSASSDVVKWISAGFSVSETWTTGSAHTCGGGRGDTVCIWYQTAFTAYTVQNRNVNFQCQKSMPLGGPKIIWSPNTNNVGGLGYYCVSGARFCHDQGSNYWTYDGPAGGPREREVCSTC	358	none	0.23	cyto_nucl 17, nucl 16, cyto 12	cyto_nucl	Cluster03623	-	-	-	-	-	-	-	-	-	-	-	-	-	-	-
g5062.t1	Dreco_g5062	MRSVSFIAVLAALAQASCALKVDIRADTNRDGKVDTEGVTDVPGKHRWTDSLGALFLANIGDTNRRCGQMEGMQGNETVVSDETLMACHDAADDLQRAPQYLAPMRTMPLMNLSPSAFGSVSVVEEQSRTLVRVFRRVGGQEGWRIVKNDTVLAAEELANGLELGIDARDVRRPGWDGKATVQFSVTDGGQTSSDAVALRVAPLFTHHHLQKVETVLASDMSGERAYMNASEKAEASATIREIAKIVKAAGIDRPLRQLHTPDLWTEDYFEPTFMSIPGPEGPVVLRIMVSTSDEHRSYLTHRLPFQQLRDTGIGAVHYHPGDISNQNYMEAFGNLETIPPYEAPGTGKKYPMGRIIAGGAMSDRPPTGYDIFRAQGVQDPLLVDSQWLLVQHVDEFLQ…	0.736	20	0.804	20	0.939	11	0.874	0.842	Y	0.45	SignalP-noTM		extr 21, plas 3, mito 1, E.R. 1, golg 1	KVDIRADTNRDGKVDTEGVTDVPGKHRWTDSLGALFLANIGDTNRRCGQMEGMQGNETVVSDETLMACHDAADDLQRAPQYLAPMRTMPLMNLSPSAFGSVSVVEEQSRTLVRVFRRVGGQEGWRIVKNDTVLAAEELANGLELGIDARDVRRPGWDGKATVQFSVTDGGQTSSDAVALRVAPLFTHHHLQKVETVLASDMSGERAYMNASEKAEASATIREIAKIVKAAGIDRPLRQLHTPDLWTEDYFEPTFMSIPGPEGPVVLRIMVSTSDEHRSYLTHRLPFQQLRDTGIGAVHYHPGDISNQNYMEAFGNLETIPPYEAPGTGKKYPMGRIIAGGAMSDRPPTGYDIFRAQGVQDPLLVDSQWLLVQHVDEFLQFLPANTTRGWSIMINDPDAG…	590	none	0.45	nucl 12.5, cyto_nucl 12.5, cyto 11.5, extr 4	nucl	Cluster00212	Q9Z183|PADI4_MOUSE|9e-37	-	PF03068|Protein-arginine deiminase (PAD)|1.2E-102;	PTHR10837:SF8||2.6E-65;PTHR10837:SF8||2.6E-65;PTHR10837||2.6E-65;PTHR10837||2.6E-65;	SSF110083||5.36E-14;SSF55909||3.53E-69;SSF55909||3.53E-69;	-	-	-	-	-	-	-	-	-	-
g5066.t1	Dreco_g5066	MRPQSLFPLLALGNIAHGAATGDVSPGGLALTRRELEARGFVDDIWKKIKNVASCAGCEVSVGAVHAMGRRCGLHTRQGVLGLFKGLTWLGDGAFVRVTQTICKLAKVQDADVCEGAIALEGPVIANVIRNLKIGSKTSKTFCTTLFGLCGFPDVAPWSVPFPSVKPSRSRPKSGGKPPIKIVHYSDIHIDPLYVAGASADCSKPICCRPYTPADAPGKSKSPAGPNGDHKCDVPFSLEKSMYRAINKVAPDAAFAIFTGDIVDHAVWKTSQTSNAQIIDHAYTTMNDSLKLVYGTVGNHEQHPVDAIQPISVGNNANWLYGLLSSKWQSWIGKPSTASAESMGAYSTKYPKGNLRVISLNTNLYYQRNYWLYRNMEDKDPNSQIAWLVRELDAAEKAG…	0.401	22	0.458	22	0.705	16	0.519	0.491	Y	0.45	SignalP-noTM		extr 10, mito 8, cyto 6, cyto_nucl 4.5	DVSPGGLALTRRELEARGFVDDIWKKIKNVASCAGCEVSVGAVHAMGRRCGLHTRQGVLGLFKGLTWLGDGAFVRVTQTICKLAKVQDADVCEGAIALEGPVIANVIRNLKIGSKTSKTFCTTLFGLCGFPDVAPWSVPFPSVKPSRSRPKSGGKPPIKIVHYSDIHIDPLYVAGASADCSKPICCRPYTPADAPGKSKSPAGPNGDHKCDVPFSLEKSMYRAINKVAPDAAFAIFTGDIVDHAVWKTSQTSNAQIIDHAYTTMNDSLKLVYGTVGNHEQHPVDAIQPISVGNNANWLYGLLSSKWQSWIGKPSTASAESMGAYSTKYPKGNLRVISLNTNLYYQRNYWLYRNMEDKDPNSQIAWLVRELDAAEKAGENVYIIGHMPLGDKDALPDPSN…	641	170 - SRPKSGG - 176	0.11	nucl 14.5, cyto_nucl 14.5, cyto 13.5	nucl	Cluster01031	Q10916|ASM1_CAEEL|4e-60	-	PF00149|Calcineurin-like phosphoesterase|3.5E-13;	PTHR10340||6.0E-173;PTHR10340:SF34||6.0E-173;	SSF56300||5.12E-44;	-	-	-	-	-	Coil||-;	G3DSA:3.60.21.10||3.8E-51;	-	-	-
g5074.t1	Dreco_g5074	MASLKTVVVTALMASAYALPPVQRVSARRLKYHSLAVRQNAAAEKQGLSDVDILQFALTLENLESSFYREGFAKFPDAEFAALGLNERAISDLKSIGKTEEQHVGLLQSAVAQAGIQPVQPCTYNFNLTDAKSMVATAAVLENVGVSAYLGAAPLVSDKGILTTAASIVTIESRHQSAIRIFSGTSAIPQAFDAPLNPRSVFTLAAPFIKECPQGSNLAIQPFPALSMDSPGPAQVGSTISVTAANTAEAKFCAFTSGGVSPGDTMFTPLTDGRNCVVPSVAGVSYLSLTKEAPLDGVLKDDLILAGPMVVTVT	0.578	19	0.589	19	0.72	6	0.613	0.602	Y	0.45	SignalP-noTM		extr 15, mito 10	PPVQRVSARRLKYHSLAVRQNAAAEKQGLSDVDILQFALTLENLESSFYREGFAKFPDAEFAALGLNERAISDLKSIGKTEEQHVGLLQSAVAQAGIQPVQPCTYNFNLTDAKSMVATAAVLENVGVSAYLGAAPLVSDKGILTTAASIVTIESRHQSAIRIFSGTSAIPQAFDAPLNPRSVFTLAAPFIKECPQGSNLAIQPFPALSMDSPGPAQVGSTISVTAANTAEAKFCAFTSGGVSPGDTMFTPLTDGRNCVVPSVAGVSYLSLTKEAPLDGVLKDDLILAGPMVVTVT	295	none	0.04	mito 15, cyto_nucl 9, cyto 8.5, nucl 6.5	mito	Cluster01283	P53693|RDS1_SCHPO|3e-14	-	PF13668|Ferritin-like domain|1.6E-41;	PTHR31694:SF8||2.1E-108;PTHR31694||2.1E-108;	SSF47240||3.45E-13;	-	-	-	-	-	-	G3DSA:1.20.1260.10||4.1E-6;	-	-	-
g5091.t1	Dreco_g5091	MKFTTIFAATAFVATASAAAIEGSHEEKAWPTMKPWGGKNNTRTTEDHHGKTTKTTEHHDIKTKTKDHHDDDKKPHHTTYVIHSDFTTYCPEPTTICVGTKTYTVTKAATLTITDCPCTITKELPHTNVPVPPPHTYTKAPPAPAPPVYTHHAPAPAPAPAPAPAPAPAPAPAPAPAPAPAPAPAPAPAPAPAPAPAPAPAPAPAPAPAPAPVYTQASTPAETTEPSVVVGGADRAGAGVGALVVAGFVAMLL	0.419	19	0.587	19	0.86	1	0.815	0.71	Y	0.45	SignalP-noTM		extr 22, mito 3	AIEGSHEEKAWPTMKPWGGKNNTRTTEDHHGKTTKTTEHHDIKTKTKDHHDDDKKPHHTTYVIHSDFTTYCPEPTTICVGTKTYTVTKAATLTITDCPCTITKELPHTNVPVPPPHTYTKAPPAPAPPVYTHHAPAPAPAPAPAPAPAPAPAPAPAPAPAPAPAPAPAPAPAPAPAPAPAPAPAPAPAPAPAPVYTQASTPAETTEPSVVVGGADRAGAGVGALVVAGFVAMLL	234	none	0.08	plas 16, pero 7, cyto 5, nucl 2, mito 2, mito_nucl 2	plas		P40092|SPI1_YEAST|6e-09	-	-	PTHR35523:SF1||8.5E-14;PTHR35523||8.5E-14;	-	-	-	-	-	-	-	-	-	-	-
g5092.t1	Dreco_g5092	MHFTNTFLALAASAVVANAASVTFWPLDNSTRTIYFTSNPGSSSLPPVTVGLKNVTVQFPDQWVGNFYAVRKGQPNVPGMLGEVQFGGWKGLTYFDVSAIVTPGDHLNVKQMWPAQSQSPMSGCEVFPCNNAYYLPDDVQTKTTLEVDLFTTLGVGSTGLSFGGQSY	0.524	20	0.683	20	0.938	11	0.894	0.797	Y	0.45	SignalP-noTM		extr 25	SVTFWPLDNSTRTIYFTSNPGSSSLPPVTVGLKNVTVQFPDQWVGNFYAVRKGQPNVPGMLGEVQFGGWKGLTYFDVSAIVTPGDHLNVKQMWPAQSQSPMSGCEVFPCNNAYYLPDDVQTKTTLEVDLFTTLGVGSTGLSFGGQSY	147	none	0.01	nucl 15.5, cyto_nucl 14, cyto 7.5, extr 7	nucl	Cluster06513	-	-	-	-	-	-	-	-	-	-	-	-	-	-	-
g5094.t1	Dreco_g5094	MRFLSATVTAALTALAGMAALAEGAPGEVKPCPTVTSTSACSTCVRPFCVTESTLTCRYGCPTPVPTVVNKFPCGGHCPGGCNTFYVLTNCGKPGPTPTAA	0.542	25	0.681	25	0.948	3	0.86	0.777	Y	0.45	SignalP-noTM		extr 14, mito 5, cyto 3, pero 2, vacu 2	PGEVKPCPTVTSTSACSTCVRPFCVTESTLTCRYGCPTPVPTVVNKFPCGGHCPGGCNTFYVLTNCGKPGPTPTAA	76	none	0.04	extr 24, cyto_nucl 3, nucl 2.5, cyto 2.5	extr		-	-	-	-	-	-	-	-	-	-	-	-	-	-	-
g5095.t1	Dreco_g5095	MAVSRLLLPLLALAGSVVGELQPIEVKGSKFFYKNGTQFFMKGIAYQQELGPGSSGNGLSYVDPLADEESCRRDVPLLKELGTNTIRTYAVDPTADHSACMKLLDEAGIYVISDLGNPLESINRNTPQWNTALLKRYLLVVDELARYSNVIGFFAGNEVTNAKNNTDATAYVKAAVRDVKKHIKESKEITRWLGAGYAANDDPDVRDNMADYFNCDTVEDSIDFWGINIYSWCGDSDMKTASFGKQMDFFRNYSLPTFFAEYGCNQVPGGAEGRLFTETTALYSDEMTEVLSGGIVYMYFQETNDYGLVKVEKGKAKKMKNFAALKKHANGARPTALHIDDYKPAGMMRQCPAVTSNWELNKALPPTPDQGVCDCMVKSLSCAPASDITAEKMGEVFGI…	0.418	20	0.614	20	0.959	11	0.898	0.768	Y	0.45	SignalP-noTM		extr 20, plas 3, E.R. 2	LQPIEVKGSKFFYKNGTQFFMKGIAYQQELGPGSSGNGLSYVDPLADEESCRRDVPLLKELGTNTIRTYAVDPTADHSACMKLLDEAGIYVISDLGNPLESINRNTPQWNTALLKRYLLVVDELARYSNVIGFFAGNEVTNAKNNTDATAYVKAAVRDVKKHIKESKEITRWLGAGYAANDDPDVRDNMADYFNCDTVEDSIDFWGINIYSWCGDSDMKTASFGKQMDFFRNYSLPTFFAEYGCNQVPGGAEGRLFTETTALYSDEMTEVLSGGIVYMYFQETNDYGLVKVEKGKAKKMKNFAALKKHANGARPTALHIDDYKPAGMMRQCPAVTSNWELNKALPPTPDQGVCDCMVKSLSCAPASDITAEKMGEVFGIICGRDPSACVGISGNPATGI…	513	313 - KGKAKKMKNFAALKK - 327	0	cyto 13, mito_pero 6, mito 5, pero 5, nucl 3, plas 2.5, extr_plas 2.5	cyto	Cluster00140	D4ATC3|GAS1_ARTBC|1e-174	2808|PHI:2808|gas1|Q2KN79|59765|Fusariumoxysporumf.sp.Lycopersici|Reducedvirulence|0.0	PF03198|Glucanosyltransferase|2.9E-117;PF07983|X8 domain|6.6E-20;	PTHR31468||2.1E-211;PTHR31468:SF2||2.1E-211;	SSF51445||3.63E-54;	-	-	-	-	SM00768|Possibly involved in carbohydrate binding|3.3E-18;	-	G3DSA:3.20.20.80||7.6E-37;	-	-	-
g5128.t1	Dreco_g5128	MASGLFQTALLLAPLTSSTATLVCAWDQHVFHSALTRPETQPHAEAILPSFWRTLLPTGLPQVVAQLGATACTSTVALCLHGDLLRRRSAHGWYVAAATLAVAHLAYGPLVARSIKRVLDDERREGRSNVAVERVWVDVNLLRMLTTDLAAWACALVAVTKALTAHP	0.498	21	0.663	21	0.961	5	0.89	0.785	Y	0.45	SignalP-noTM		extr 12, mito 8, cyto 3, pero 2, E.R. 2	LVCAWDQHVFHSALTRPETQPHAEAILPSFWRTLLPTGLPQVVAQLGATACTSTVALCLHGDLLRRRSAHGWYVAAATLAVAHLAYGPLVARSIKRVLDDERREGRSNVAVERVWVDVNLLRMLTTDLAAWACALVAVTKALTAHP	146	none	0.13	extr 17, cyto 9.5, cyto_nucl 7.5, nucl 4.5	extr	Cluster06553	-	-	-	-	-	-	-	-	-	-	-	-	-	-	-
g5145.t1	Dreco_g5145	MLASALAFGLAGLAAASPIGERDSVAHYPATSLSKGFHLVVNVTDRCKDFDPPIHNTYITSIHTGAGLALVGNVAGPGTARIFYQNATSEQSKSGDGTVVTDSGTPPYPAGLKLVKDEASSTLRTAHLDAGLGTPGIGISKFPEPYAFLTQETWVACNESLSYFRGQHFIIFKSAKTTVGKDGTAHRNIPEGCAPVRLLPECTDLNALAVGSYASHAYALEGRCYQDVKSIKWSDFGP	0.657	17	0.734	17	0.864	1	0.802	0.77	Y	0.45	SignalP-noTM		extr 21, mito 4	PIGERDSVAHYPATSLSKGFHLVVNVTDRCKDFDPPIHNTYITSIHTGAGLALVGNVAGPGTARIFYQNATSEQSKSGDGTVVTDSGTPPYPAGLKLVKDEASSTLRTAHLDAGLGTPGIGISKFPEPYAFLTQETWVACNESLSYFRGQHFIIFKSAKTTVGKDGTAHRNIPEGCAPVRLLPECTDLNALAVGSYASHAYALEGRCYQDVKSIKWSDFGP	221	none	0	cyto 16.5, cyto_nucl 14, nucl 8.5, cyto_plas 8.5, cyto_golg 8.5	cyto	Cluster01023	-	-	-	-	-	-	-	-	-	-	-	-	-	-	-
g5160.t1	Dreco_g5160	MGSARLLVAAFLALVGIANAQAYVPASLSLFAVYSISSVSNVGVSNVYGSVGVGSSSVSGFPPGNVIGGAIYVPPAGELEMVESDVIDLFFQGLSAVINADLSGQNLGGMTLGPGGYSFTADAALTGTLVLDGQNDDGSQWIFEVFGNLIAADSARIVLINGALSCNIFWSVVGSVVIGSQATTRGTVSSIGTISLGEGAFHYGGLYSISDKVSLDSGIVVGCRATYDEPTTTTDMMTSSTAVTDTTMSLTHLGYGCDVLCSQLDGFDDCSRVHNGRSNDHGHRGYNDQYCDDYCRKYHGYGHVGHHNRGHDSYRYHSLHCYGIHVGYYNRNDGDGSHDYHDYGCVGYHNRGRNGYRYHNLHWNGFHCDGFHCYYCYRYYSDRSYGYHGHHGYGHVDCY…	0.81	23	0.861	21	0.959	4	0.924	0.895	Y	0.45	SignalP-noTM		extr 26	VPASLSLFAVYSISSVSNVGVSNVYGSVGVGSSSVSGFPPGNVIGGAIYVPPAGELEMVESDVIDLFFQGLSAVINADLSGQNLGGMTLGPGGYSFTADAALTGTLVLDGQNDDGSQWIFEVFGNLIAADSARIVLINGALSCNIFWSVVGSVVIGSQATTRGTVSSIGTISLGEGAFHYGGLYSISDKVSLDSGIVVGCRATYDEPTTTTDMMTSSTAVTDTTMSLTHLGYGCDVLCSQLDGFDDCSRVHNGRSNDHGHRGYNDQYCDDYCRKYHGYGHVGHHNRGHDSYRYHSLHCYGIHVGYYNRNDGDGSHDYHDYGCVGYHNRGRNGYRYHNLHWNGFHCDGFHCYYCYRYYSDRSYGYHGHHGYGHVDCYDGGHNGYRNYCLHCYGCHSYNCH…	593	none	0.19	extr 17.5, extr_plas 14.5, plas 10.5	extr		-	-	PF11999|Protein of unknown function (DUF3494)|1.3E-32;	-	-	-	-	-	-	-	-	-	-	-	-
g5193.t1	Dreco_g5193	MARLARLIAVAAAAATAAGVTAAGDESILTSEIGRLNNQSLLWGPYKPNLYFGMRPRLPQGLMAVLMWGRINNHADINEGIRYTCEQNDGMHGYGWDEYDARDGGVQTIHDDANMIDMTTSLVKIPGGNHGGSWAVRVKGKLMKNAAKDHKTAIYLYIAQEAAGELNVIGTGTEFGFEGDVRLDGKTEALGNYQILVTKGNGKHPTSDHPATLLKRLDTTVVASETYPNNLLWQARPLLYRELQKPAKHFEETYGSEDLPPASQMYRINHTPGRANTHMVQKTFEGDFQFDLVFMSASMGRNITSKDVTREIKRTSESFGERFSSVFDFQAPFKAAKYQQFGKSMFSNLLGGVGYFHGDQVIDRSYAAEYEEEDENFWVDAAEARARGHQKAEGPFELF…	0.368	23	0.529	23	0.948	3	0.761	0.654	Y	0.45	SignalP-noTM		extr 12, E.R. 4, golg 4, mito 3, plas 2, mito_nucl 2	GDESILTSEIGRLNNQSLLWGPYKPNLYFGMRPRLPQGLMAVLMWGRINNHADINEGIRYTCEQNDGMHGYGWDEYDARDGGVQTIHDDANMIDMTTSLVKIPGGNHGGSWAVRVKGKLMKNAAKDHKTAIYLYIAQEAAGELNVIGTGTEFGFEGDVRLDGKTEALGNYQILVTKGNGKHPTSDHPATLLKRLDTTVVASETYPNNLLWQARPLLYRELQKPAKHFEETYGSEDLPPASQMYRINHTPGRANTHMVQKTFEGDFQFDLVFMSASMGRNITSKDVTREIKRTSESFGERFSSVFDFQAPFKAAKYQQFGKSMFSNLLGGVGYFHGDQVIDRSYAAEYEEEDENFWVDAAEARARGHQKAEGPFELFTSIPSRPFFPRGFLWDEGFHLMP…	791	none	0.31	cyto 13.5, nucl 8, cyto_golg 7.5, extr 5, pero 3	cyto	Cluster05502	O14255|GCS1_SCHPO|0	-	PF16923|Glycosyl hydrolase family 63 N-terminal domain|2.2E-72;PF03200|Glycosyl hydrolase family 63 C-terminal domain|1.3E-165;	PTHR10412:SF11||0.0;PTHR10412:SF11||0.0;PTHR10412||0.0;PTHR10412||0.0;	SSF48208||6.8E-89;SSF48208||6.8E-89;	-	-	-	-	-	-	G3DSA:1.50.10.10||3.0E-4;	-	-	-
g5215.t1	Dreco_g5215	MTPTSMLALLTLLSHSLAWPEAEGRELHYATVPGYFLQDDASTDPDGFDYAAWNFGLVNRTYPTDDWFDPARSKTQWQRFAYWLDHLNNGCRRQERVRYKLLVFGRHGQGWHNTAESFYGTPAWNCYWAELDGNGTSVWADALLTGQGLAEAARANGYFASRFSHQGMPYFDSYYVSPLSRCVQTANATFASLDLPADRPFRPVIKELLREGISVHTCDRRSTRSRIRRFAPASFAFEPAFAEADELWQGGGPDGRGETEAHALARAKALLDDVFAHDDGMTISLTSHSGQIASLLTALRHRPFSLGTGQIIPVLVRASAAVEEREEPRASGTAPGFTREVTCTAPPVTSIAGTGCDGRRGRCEGTRTGEWAELDGNGTSVWADALLTGQRLAEASDRP…	0.741	25	0.779	19	0.911	15	0.88	0.833	Y	0.45	SignalP-noTM		extr 13, nucl 8, cyto 5	ELHYATVPGYFLQDDASTDPDGFDYAAWNFGLVNRTYPTDDWFDPARSKTQWQRFAYWLDHLNNGCRRQERVRYKLLVFGRHGQGWHNTAESFYGTPAWNCYWAELDGNGTSVWADALLTGQGLAEAARANGYFASRFSHQGMPYFDSYYVSPLSRCVQTANATFASLDLPADRPFRPVIKELLREGISVHTCDRRSTRSRIRRFAPASFAFEPAFAEADELWQGGGPDGRGETEAHALARAKALLDDVFAHDDGMTISLTSHSGQIASLLTALRHRPFSLGTGQIIPVLVRASAAVEEREEPRASGTAPGFTREVTCTAPPVTSIAGTGCDGRRGRCEGTRTGEWAELDGNGTSVWADALLTGQRLAEASDRPSIHRSDLVLVLSPSASIAPIRPRLP…	1053	none	0.63	nucl 27.5, cyto_nucl 17.5	nucl	Cluster07102	D4B4V1|PMU1_ARTBC|2e-71	-	PF00300|Histidine phosphatase superfamily (branch 1)|1.3E-10;	PTHR23029||2.6E-99;PTHR23029||2.6E-99;PTHR23029:SF52||2.6E-99;PTHR23029:SF52||2.6E-99;	SSF53254||5.77E-26;	-	-	-	-	-	-	G3DSA:3.40.50.1240||5.5E-18;	-	-	-
g5218.t1	Dreco_g5218	MSALALLTAYALTAAAAPSSEFGFINPRSIIEADCRGNAVVKNSLTQCAGMARTAAKAALDTSSNLMKDFFKFEDQNSRQQVADVYNAVAAECESKGQGQVKVTCDDTKDQGCSWAGGITKNGEVILCRGFFVKADIRNSQCGGIDAGNTMLHEMTHALRGTQDLSNLAPKNTLGGYGLNFIFSLNGQNNLIHADTYSQFAQAADLSCTDQELSNRAQKTPGEGATTAKDKAQATKQDAGQGGQIPPSSGMGSQGTDSSGIIDNTLGTDAQGTFSSGRNSAAQFGQNTALQSSQNENALGGVSGAPQRSEYAQGTGQYQYAQNGQYYQNGQYYQNGQYAQNGQYAQNGQYAQNGQYAQGQYAQGQYAQNGQYAQNGQYAQGQYAQGGAYQYYQ	0.276	17	0.472	17	0.864	15	0.8	0.649	Y	0.45	SignalP-noTM		extr 24, nucl 3	PSSEFGFINPRSIIEADCRGNAVVKNSLTQCAGMARTAAKAALDTSSNLMKDFFKFEDQNSRQQVADVYNAVAAECESKGQGQVKVTCDDTKDQGCSWAGGITKNGEVILCRGFFVKADIRNSQCGGIDAGNTMLHEMTHALRGTQDLSNLAPKNTLGGYGLNFIFSLNGQNNLIHADTYSQFAQAADLSCTDQELSNRAQKTPGEGATTAKDKAQATKQDAGQGGQIPPSSGMGSQGTDSSGIIDNTLGTDAQGTFSSGRNSAAQFGQNTALQSSQNENALGGVSGAPQRSEYAQGTGQYQYAQNGQYYQNGQYYQNGQYAQNGQYAQNGQYAQNGQYAQGQYAQGQYAQNGQYAQNGQYAQGQYAQGGAYQYYQ	376	none	0.31	cyto_nucl 13.5, cyto 12.5, nucl 11.5, cysk 5	cyto_nucl	Cluster07101	E3QWD3|NPIIA_COLGM|5e-18	2850|PHI:2850|AVR-Pita1|C1KJH9|148305|Magnaportheoryzae|Effector(plantavirulencedeterminant)|4e-08	PF02102|Deuterolysin metalloprotease (M35) family|4.4E-15;	PTHR37016||1.3E-26;	SSF55486||1.14E-26;	-	-	-	-	-	-	G3DSA:3.40.390.10||7.2E-33;	-	-	PR00768|Deuterolysin metalloprotease (M35) family signature|2.0E-8;PR00768|Deuterolysin metalloprotease (M35) family signature|2.0E-8;PR00768|Deuterolysin metalloprotease (M35) family signature|2.0E-8;
g5219.t1	Dreco_g5219	MASLPLLLSLWALTATAAPAIKDGRVAARSQISPSCGNNVWVRNSLKQCASLARTAAATAMNTSSTLMKDFFKFEDERSRKFVSEVYAMIAEECESEGQGLVTINCDESRQPQGCTWAAGITQGHEVTLCHGFFINGDNRSPRCGGIDAGNTMLHEMTHALNGTKDLSQFAPSNSLGGYGLNFIFSLNGENNLIHADTYSQFAQAADLSCSEQDLRDRAQKTPGEGAVHGAGTSRDRDADESEAPPARTPGTGPGRSLQTPGSNRNDPFQGQTPSIPAQSGQAPPRNTMDQNLQGTGQFSQGQFNGGAGTATTAPVQPQDLGGMLSSAVSAGLRFLGG	0.35	18	0.575	18	0.967	9	0.942	0.773	Y	0.45	SignalP-noTM		extr 25	PAIKDGRVAARSQISPSCGNNVWVRNSLKQCASLARTAAATAMNTSSTLMKDFFKFEDERSRKFVSEVYAMIAEECESEGQGLVTINCDESRQPQGCTWAAGITQGHEVTLCHGFFINGDNRSPRCGGIDAGNTMLHEMTHALNGTKDLSQFAPSNSLGGYGLNFIFSLNGENNLIHADTYSQFAQAADLSCSEQDLRDRAQKTPGEGAVHGAGTSRDRDADESEAPPARTPGTGPGRSLQTPGSNRNDPFQGQTPSIPAQSGQAPPRNTMDQNLQGTGQFSQGQFNGGAGTATTAPVQPQDLGGMLSSAVSAGLRFLGG	320	none	0.32	mito 13.5, nucl 10.5, cyto_mito 10.1667, cyto_nucl 9.5, cyto 5, cyto_pero 4.33333	mito	Cluster07101	E3QWD3|NPIIA_COLGM|7e-13	-	PF02102|Deuterolysin metalloprotease (M35) family|4.9E-14;	PTHR37016||2.7E-25;	SSF55486||7.69E-24;	-	-	-	-	-	-	G3DSA:3.40.390.10||4.9E-29;	-	-	-
g5239.t1	Dreco_g5239	MKFLAATIATLASVAVASPVPYQSGDSGDYNSNNCADGSYDCAQNMMPRQNFQGAMPGQDFQNVVPGQDFQNVIPGQDFQNVIPGQDFQNVIPGQDFQNVMPGQDFQNVMPGQDFQGGFQAGQGFQPGFQGGFMPPQNMQNGQYYPNYQNGQYYPNGQNWQNGQNWQNGQNWQNWQNGPFIQGGMCRPATYQCSQNFNNGLPGWSVCNTSGQWVHGGDCAPGQTCQFNFANGSPYCI	0.433	18	0.615	18	0.932	11	0.873	0.754	Y	0.45	SignalP-noTM		extr 23, E.R. 2	PVPYQSGDSGDYNSNNCADGSYDCAQNMMPRQNFQGAMPGQDFQNVVPGQDFQNVIPGQDFQNVIPGQDFQNVIPGQDFQNVMPGQDFQNVMPGQDFQGGFQAGQGFQPGFQGGFMPPQNMQNGQYYPNYQNGQYYPNGQNWQNGQNWQNGQNWQNWQNGPFIQGGMCRPATYQCSQNFNNGLPGWSVCNTSGQWVHGGDCAPGQTCQFNFANGSPYCI	219	none	0.2	extr 21, cyto 9.5, cyto_nucl 5.5	extr		-	-	-	-	-	-	-	-	-	-	-	-	-	-	-
g5240.t1	Dreco_g5240	MAPPLWLAFGCFLFIGVHGLASPVVVDARRNITYHGTRRNGIEAFLGIPYGLDTGGPNRFRPPRPHVPRVGDRIMATSHGAACPQQLGGWLIPISLSNVTSISEDCLTLNVARPRGTCHQDRLPVMVYIHGGSFWTGQSQEITIQPDGLVLESVQNGLPVIHVAMNYRLGLFGFAQSDALRAERSENAALRDQRLAMEWVRDNIAPFGGNPDSVTIFGQSSGGLAVGMHIVAYAGRKRAPFHRAICQSQALEPGITANFTSSAMRAVIEHVGCRSNDVHAKETMACLRDLDMQTLLNASLATYRGDISHNIGDIWLPVVDGDFLPAAPSRLVREAQFSHVTTMLGWCEDDVTFFTDIKIRTAEDTARFLAAYLQGVNEPSLRRLLSLYPVSDFPRVEAG…	0.665	20	0.789	20	0.956	16	0.939	0.87	Y	0.45	SignalP-noTM		extr 15, plas 5, mito 3, pero 2, cyto_mito 2	ASPVVVDARRNITYHGTRRNGIEAFLGIPYGLDTGGPNRFRPPRPHVPRVGDRIMATSHGAACPQQLGGWLIPISLSNVTSISEDCLTLNVARPRGTCHQDRLPVMVYIHGGSFWTGQSQEITIQPDGLVLESVQNGLPVIHVAMNYRLGLFGFAQSDALRAERSENAALRDQRLAMEWVRDNIAPFGGNPDSVTIFGQSSGGLAVGMHIVAYAGRKRAPFHRAICQSQALEPGITANFTSSAMRAVIEHVGCRSNDVHAKETMACLRDLDMQTLLNASLATYRGDISHNIGDIWLPVVDGDFLPAAPSRLVREAQFSHVTTMLGWCEDDVTFFTDIKIRTAEDTARFLAAYLQGVNEPSLRRLLSLYPVSDFPRVEAGALSSEFYRSARIFRDVLMVC…	557	none	0.24	mito 11, nucl 10.5, cyto_nucl 9, cyto 6.5, mito_pero 6.5	mito	Cluster07104	D4ASH1|LIP1_ARTBC|0	541|PHI:541|LIP1|AAU87359|332648|Botrytiscinerea|Unaffectedpathogenicity|5e-43	PF00135|Carboxylesterase family|3.7E-92;	PTHR11559:SF228||4.5E-186;PTHR11559||4.5E-186;	SSF53474||4.98E-96;	-	-	PS00122|Carboxylesterases type-B serine active site.|-;	-	-	Coil||-;	G3DSA:3.40.50.1820||5.2E-125;	-	-	-
g5254.t1	Dreco_g5254	MQTRELLAWAMLAVAGVVRAEADVPPPAESSEAVASDGVASDGEASEPAAPISIIPDDYTCVHPPYRAHIFSQSPLIVYLENFITPDERVHLQAIAHGKFQSSVVLNPEGRAVSNSVRSSQSTTVKADAVVRCVEARALDFQGFDIPAVHVEGIQLVKYAPTQQYLHHTDWLKDPHKSIKEGGNRISSFFGSVKAVNVTGGGTNFPLQTAPTDSRWCRFVDCDQPYDAGVTFRPIEGNVVYWNNLHEDGRGDDRTLHAGLPVVSGEKIGINIWTRQAAVPDWWRN	0.622	23	0.677	23	0.889	15	0.736	0.709	Y	0.45	SignalP-noTM		extr 20, cyto 4.5, cyto_nucl 3	VPPPAESSEAVASDGVASDGEASEPAAPISIIPDDYTCVHPPYRAHIFSQSPLIVYLENFITPDERVHLQAIAHGKFQSSVVLNPEGRAVSNSVRSSQSTTVKADAVVRCVEARALDFQGFDIPAVHVEGIQLVKYAPTQQYLHHTDWLKDPHKSIKEGGNRISSFFGSVKAVNVTGGGTNFPLQTAPTDSRWCRFVDCDQPYDAGVTFRPIEGNVVYWNNLHEDGRGDDRTLHAGLPVVSGEKIGINIWTRQAAVPDWWRN	262	none	0	cyto_nucl 13, nucl 10, cyto 10, cysk 6, extr 4	cyto_nucl	Cluster03760	Q9ZW86|P4H1_ARATH|3e-24	-	-	PTHR10869||1.7E-52;PTHR10869:SF57||1.7E-52;	-	-	-	-	-	SM00702|Prolyl 4-hydroxylase alpha subunit homologues.|2.8E-16;	-	-	-	-	-
g5259.t1	Dreco_g5259	MHTVTLLSTALATLAASVVASPTPNAAAPEQVEIRDFVATVVTDLKEYTTTYDAEFKIDGPVAKDLKCYMNGQKLGGRFEVNPCEGFQYNFGLTNTVDELFFMVRMGYNKGSGEEFSGQDMLPTSMCEEEAQPNKDIFVRKCRQNGPLTVTLDPK	0.675	21	0.778	21	0.959	11	0.894	0.84	Y	0.45	SignalP-noTM		extr 12, E.R. 9, mito 2, golg 2	PTPNAAAPEQVEIRDFVATVVTDLKEYTTTYDAEFKIDGPVAKDLKCYMNGQKLGGRFEVNPCEGFQYNFGLTNTVDELFFMVRMGYNKGSGEEFSGQDMLPTSMCEEEAQPNKDIFVRKCRQNGPLTVTLDPK	134	none	0.01	cyto 15.5, extr 13, cyto_nucl 8.5	cyto		-	-	-	-	-	-	-	-	-	-	-	-	-	-	-
g5261.t1	Dreco_g5261	MQLHVRLCGLFLASLSCVHAAAPTATDRCPQGEPTWPDLIRNVSTFDDGRRELSVRGLNCSRTKDGDYWCAPKRSADGEGDWHRFDKLSIRVDLGFRDDDKQEYNLDAYFGDESILKTGDEAHLTNLVRNLKGGEVAVVDVALPAVFGTKTPPLRALQNFKIVQNPTKKSGFVILGVRLMARHACSRLPLIHAQYHDINRRVHTKAVSDSFAWMFYNVVWTAPLDFRF	0.524	21	0.698	21	0.974	12	0.934	0.825	Y	0.45	SignalP-noTM		extr 22, mito 2, pero 2	APTATDRCPQGEPTWPDLIRNVSTFDDGRRELSVRGLNCSRTKDGDYWCAPKRSADGEGDWHRFDKLSIRVDLGFRDDDKQEYNLDAYFGDESILKTGDEAHLTNLVRNLKGGEVAVVDVALPAVFGTKTPPLRALQNFKIVQNPTKKSGFVILGVRLMARHACSRLPLIHAQYHDINRRVHTKAVSDSFAWMFYNVVWTAPLDFRF	207	none	0.08	cyto 19.5, cyto_nucl 16, nucl 7.5, mito 3	cyto		-	-	-	-	-	-	-	-	PS51257|Prokaryotic membrane lipoprotein lipid attachment site profile.|5.0;	-	-	-	-	-	-
g5263.t1	Dreco_g5263	MRALASLLFLASVASALPRNGGAGDAAGQQVVDDDHDAVPEFFFYEDDDAEPVKDEHYFEAKEAPKIRLLPMVHPSTKSESVDRLKPVAKHSRSHVHYGQSEYVELGYFAIISYNFTYPSVNLDDYKHIDVDYDPDTGLTVSFHSRKAYETAVQHWKGHDYLIFMARTTGCVDHHLDRCYFLASRLIFSRRDMSITATGEHHPVKELISDFDSKWSYWDPMGAMQSSQAPSPGAAAAPSSTKQRRDGTADSGDATDKLREDLREELLEDKSINPVYLDPYASFPDVDQDRDEIFRNAVDSAVGNLTREQLTEGSNTVDSAVGNLTGEQLTEGSNTVDKRSPLGYIKQRIYNATSIKINDTYRLSWIFPSAEAINHAQSWTGNVLRAAGRPVGQLEDALD…	0.653	17	0.765	17	0.949	10	0.896	0.836	Y	0.45	SignalP-noTM		extr 19, mito 4, cyto 4, cyto_mito 4	PRNGGAGDAAGQQVVDDDHDAVPEFFFYEDDDAEPVKDEHYFEAKEAPKIRLLPMVHPSTKSESVDRLKPVAKHSRSHVHYGQSEYVELGYFAIISYNFTYPSVNLDDYKHIDVDYDPDTGLTVSFHSRKAYETAVQHWKGHDYLIFMARTTGCVDHHLDRCYFLASRLIFSRRDMSITATGEHHPVKELISDFDSKWSYWDPMGAMQSSQAPSPGAAAAPSSTKQRRDGTADSGDATDKLREDLREELLEDKSINPVYLDPYASFPDVDQDRDEIFRNAVDSAVGNLTREQLTEGSNTVDSAVGNLTGEQLTEGSNTVDKRSPLGYIKQRIYNATSIKINDTYRLSWIFPSAEAINHAQSWTGNVLRAAGRPVGQLEDALDVGSPWPNSIFLGSFPAE…	687	none	0.15	nucl 19, cyto_nucl 13, cyto 5, golg 3, extr 2, cysk 2, E.R._golg 2	nucl	Cluster02119	-	-	-	-	-	-	-	-	-	-	-	-	-	-	-
g5271.t1	Dreco_g5271	MAIPFFLVAVAFLVINVHAADQPLVGPVGEPGPNKPKPNFIFIMTDDQDLLLDSLNYQPMVKKHFIDKGTSFKKHFCTIALCCPSRVSLLTGKAAHNTNVTALSPPYGGYSKFIAEGLNDKYLPVWLQDAGYNTYYTGKFMNGQTLSTYNKPFAAGWTRSDFLIEPNTYYYCNASMALDNGPVQFQTGKYSTDLIANRSVEFLGNAIEAGKPFFLGVMPVGPHSETTFGKTGAVRFGSPRPADRHKDLFPDVVIPRGPSFNPDTIRPGAVGYFTRLPALSKGQIRYVDKFYRKRLQSLQAVDDLVSDIMTKLEAHPDVLANTYLFYTSDNGYHIGQHRLPPGKTCNIEEDINIPFIARGPGIAAGKAVSFPSSHTDVVPTLFELAGIPLHDDFDGEPIP…	0.797	20	0.864	20	0.962	11	0.937	0.904	Y	0.45	SignalP-noTM		extr 22, plas 3	DQPLVGPVGEPGPNKPKPNFIFIMTDDQDLLLDSLNYQPMVKKHFIDKGTSFKKHFCTIALCCPSRVSLLTGKAAHNTNVTALSPPYGGYSKFIAEGLNDKYLPVWLQDAGYNTYYTGKFMNGQTLSTYNKPFAAGWTRSDFLIEPNTYYYCNASMALDNGPVQFQTGKYSTDLIANRSVEFLGNAIEAGKPFFLGVMPVGPHSETTFGKTGAVRFGSPRPADRHKDLFPDVVIPRGPSFNPDTIRPGAVGYFTRLPALSKGQIRYVDKFYRKRLQSLQAVDDLVSDIMTKLEAHPDVLANTYLFYTSDNGYHIGQHRLPPGKTCNIEEDINIPFIARGPGIAAGKAVSFPSSHTDVVPTLFELAGIPLHDDFDGEPIPLTTASQGSKKLKQEHINVEF…	796	none	0.14	cyto 12.5, cyto_nucl 11.5, nucl 9.5, extr 4, E.R. 2, cysk 2, extr_plas 2	cyto	Cluster00401	Q10723|ARS_VOLCA|1e-103	-	PF00884|Sulfatase|1.2E-52;PF00583|Acetyltransferase (GNAT) family|1.7E-5;	PTHR10342:SF218||9.2E-179;PTHR10342||9.2E-179;	SSF55729||6.41E-13;SSF53649||4.19E-84;	-	-	PS00523|Sulfatases signature 1.|-;	PS51186|Gcn5-related N-acetyltransferase (GNAT) domain profile.|11.047;	-	-	G3DSA:3.30.1120.10||8.1E-6;G3DSA:3.40.720.10||3.6E-69;G3DSA:3.40.720.10||3.6E-69;G3DSA:3.40.630.30||5.2E-18;	-	-	-
g5285.t1	Dreco_g5285	MRFDLALLALAAQSVQVFSNPAEAQEESQVETMAESHTLELKSFPQDKPVVAAWRHDRGGRGGGGRGRGGGGRGGGGRGGRHDPYPRPYPWPRYYACDYPCQGYSCYGSYPVCRWYTYPGYATQCYCSAT	0.396	25	0.512	20	0.839	7	0.672	0.599	Y	0.45	SignalP-noTM		extr 16, mito 5, cyto 3.5, cyto_nucl 3.5	EESQVETMAESHTLELKSFPQDKPVVAAWRHDRGGRGGGGRGRGGGGRGGGGRGGRHDPYPRPYPWPRYYACDYPCQGYSCYGSYPVCRWYTYPGYATQCYCSAT	105	56 - HDRGGRGGGGRGRGGGGRGGGGRGGRH - 82	0.25	extr 30	extr		-	-	-	-	-	-	-	-	-	-	-	-	-	-	-
g5294.t1	Dreco_g5294	MGIITLLTLALFALRVCCEEGHHYVSLEEAIEQEIQIFKVKNELYLKRLYLSAESIPSNDVALARESTCWRNWGLTCQDTVFIRRQQLINISAVEFGAIRHEDQALTTGQQLNDLFKIHASKVTTKKSTAVLRSLTKGWNAGFRIVNSLAPGPSASISAEGSYDYYEESTDANTVTNEAVFEHSCLQGYHCTIQTVSFYAKVRGVCRVKPFTRCNSGEQDACYGFRKVLAKDASCAARTGKTNFRSLWGSQAREPLKVDKNNNTVEVFEWNDCQQCDQFLDFSAKHCGGRETYQEEECEVIMPVRKADGSPHTHVVFTSIPRDEYLKKYAEKYPKKGKLTPEPEPKTKDIGPYEGKKEPGPEDGKRKREVKVWAKGGKGPQRLYYVEVLKRD	0.605	19	0.747	19	0.968	1	0.913	0.837	Y	0.45	SignalP-noTM		extr 10, cyto 5.5, cyto_nucl 4, plas 3, mito 2, E.R. 2, vacu 2	EGHHYVSLEEAIEQEIQIFKVKNELYLKRLYLSAESIPSNDVALARESTCWRNWGLTCQDTVFIRRQQLINISAVEFGAIRHEDQALTTGQQLNDLFKIHASKVTTKKSTAVLRSLTKGWNAGFRIVNSLAPGPSASISAEGSYDYYEESTDANTVTNEAVFEHSCLQGYHCTIQTVSFYAKVRGVCRVKPFTRCNSGEQDACYGFRKVLAKDASCAARTGKTNFRSLWGSQAREPLKVDKNNNTVEVFEWNDCQQCDQFLDFSAKHCGGRETYQEEECEVIMPVRKADGSPHTHVVFTSIPRDEYLKKYAEKYPKKGKLTPEPEPKTKDIGPYEGKKEPGPEDGKRKREVKVWAKGGKGPQRLYYVEVLKRD	373	333 - YPKKGKLTPEPEPKTKDIGPYEGKKEPGPEDGKRKREVKVWAKGGKG - 379	0.5	nucl 11, cyto 11, cyto_nucl 11	nucl	Cluster01786	-	-	-	-	-	-	-	-	-	-	-	-	-	-	-
g5296.t1	Dreco_g5296	MKLTNVLVFATAASAAAVQSQRIHLDISKDIGADFLEGMRLDIPQRVNIDIPQKVDTNTPQKVDTNIPQKVDINTPQKVDINTPQKVDTDILKKVDTILEAAVIALNQRNQSLNGEFFQSRFSPLLKFVEHESAKIVASRGDLSMDDAHRLFKPAENLPRLAVDLYSALDGEDVKATIIQNKACSIVQGSTCSLQAALNFLSMKVGYVFPEIKRNTGYKSLASFTDSLAETCAMFRDC	0.322	21	0.425	21	0.726	1	0.544	0.489	Y	0.45	SignalP-noTM		extr 10, mito 7, cyto 4.5, cyto_nucl 4, nucl 2.5	RIHLDISKDIGADFLEGMRLDIPQRVNIDIPQKVDTNTPQKVDTNIPQKVDINTPQKVDINTPQKVDTDILKKVDTILEAAVIALNQRNQSLNGEFFQSRFSPLLKFVEHESAKIVASRGDLSMDDAHRLFKPAENLPRLAVDLYSALDGEDVKATIIQNKACSIVQGSTCSLQAALNFLSMKVGYVFPEIKRNTGYKSLASFTDSLAETCAMFRDC	217	none	0.21	cyto 19, cyto_nucl 17.5, cyto_plas 12.5, nucl 6.5	cyto	Cluster12462	-	-	-	-	-	-	-	-	-	-	-	-	-	-	-
g5300.t1	Dreco_g5300	MRSPSALLLAAGLSAAGTANLVSAADSERILGVYLFHRHGDRTAKAWSPVNLTALGADQVHNSGTFYRARYVASEAGFRVSGLSSDDAVLSQLQVVSPKDAVLHNSALTFLQGLYPPTGRTELLANGSKIEAPLGGYQYIPIDAMSEAASGDRAESNAWLQGGSGCGNAVVSSNSYFASAEYKATYDDSAALYQSLLPVINSTYGTDAANFKNGYSIYDLINVATIHNSSISSHSLLTKETLARLYQLASVHEWNLAYNATEPVRSIAGAVLAGQILDALDAVVDGKPSAPKLNVQFGAYGTFMAFFGLAQLPQANADFYGVCNYASSMAFELVTTVQDAKPKPADISVRFLFANGTAADNGLKPFPLFGLAKETLSWNDFKSAMAKFAIADTEHWCNL…	0.383	25	0.496	25	0.852	4	0.655	0.582	Y	0.45	SignalP-noTM		extr 26	DSERILGVYLFHRHGDRTAKAWSPVNLTALGADQVHNSGTFYRARYVASEAGFRVSGLSSDDAVLSQLQVVSPKDAVLHNSALTFLQGLYPPTGRTELLANGSKIEAPLGGYQYIPIDAMSEAASGDRAESNAWLQGGSGCGNAVVSSNSYFASAEYKATYDDSAALYQSLLPVINSTYGTDAANFKNGYSIYDLINVATIHNSSISSHSLLTKETLARLYQLASVHEWNLAYNATEPVRSIAGAVLAGQILDALDAVVDGKPSAPKLNVQFGAYGTFMAFFGLAQLPQANADFYGVCNYASSMAFELVTTVQDAKPKPADISVRFLFANGTAADNGLKPFPLFGLAKETLSWNDFKSAMAKFAIADTEHWCNLCGNTSGKCANRATVAGGDVFQNPMA…	457	none	0.03	cyto 13, nucl 6, mito 6, mito_nucl 6	cyto	Cluster02464	-	-	PF00328|Histidine phosphatase superfamily (branch 2)|2.1E-4;	PTHR11567||3.7E-61;PTHR11567:SF127||3.7E-61;	SSF53254||4.04E-54;	-	-	-	-	-	-	G3DSA:3.40.50.1240||3.7E-47;	-	-	-
[truncated: 208 more rows]

## Sheet: Data for comparative analysis
	Drechmeria coniospora	Metarhizium acridum	Metarhizium anisopliae	Pochonia chlamydosporia	Arthrobotrys oligospora	Monacrosporium haptotylum	Fusarium graminearum	Fusarium oxysporum	Trichoderma reesei	Tolypocladium ophioglossoides CBS_100239	Hirsutella minnesotensis 3608	Ophiocordyceps sinensis CO18
[truncated: 10 more rows]

[truncated: 1 more sheets: Comparative analysis]
